# Supplementary material
Source: publisher figshare collection journal article supplement (https://gsapubs.figshare.com/articles/dataset/_/18730850)

# B1557 Cormacks Lake Complex, Small Grains

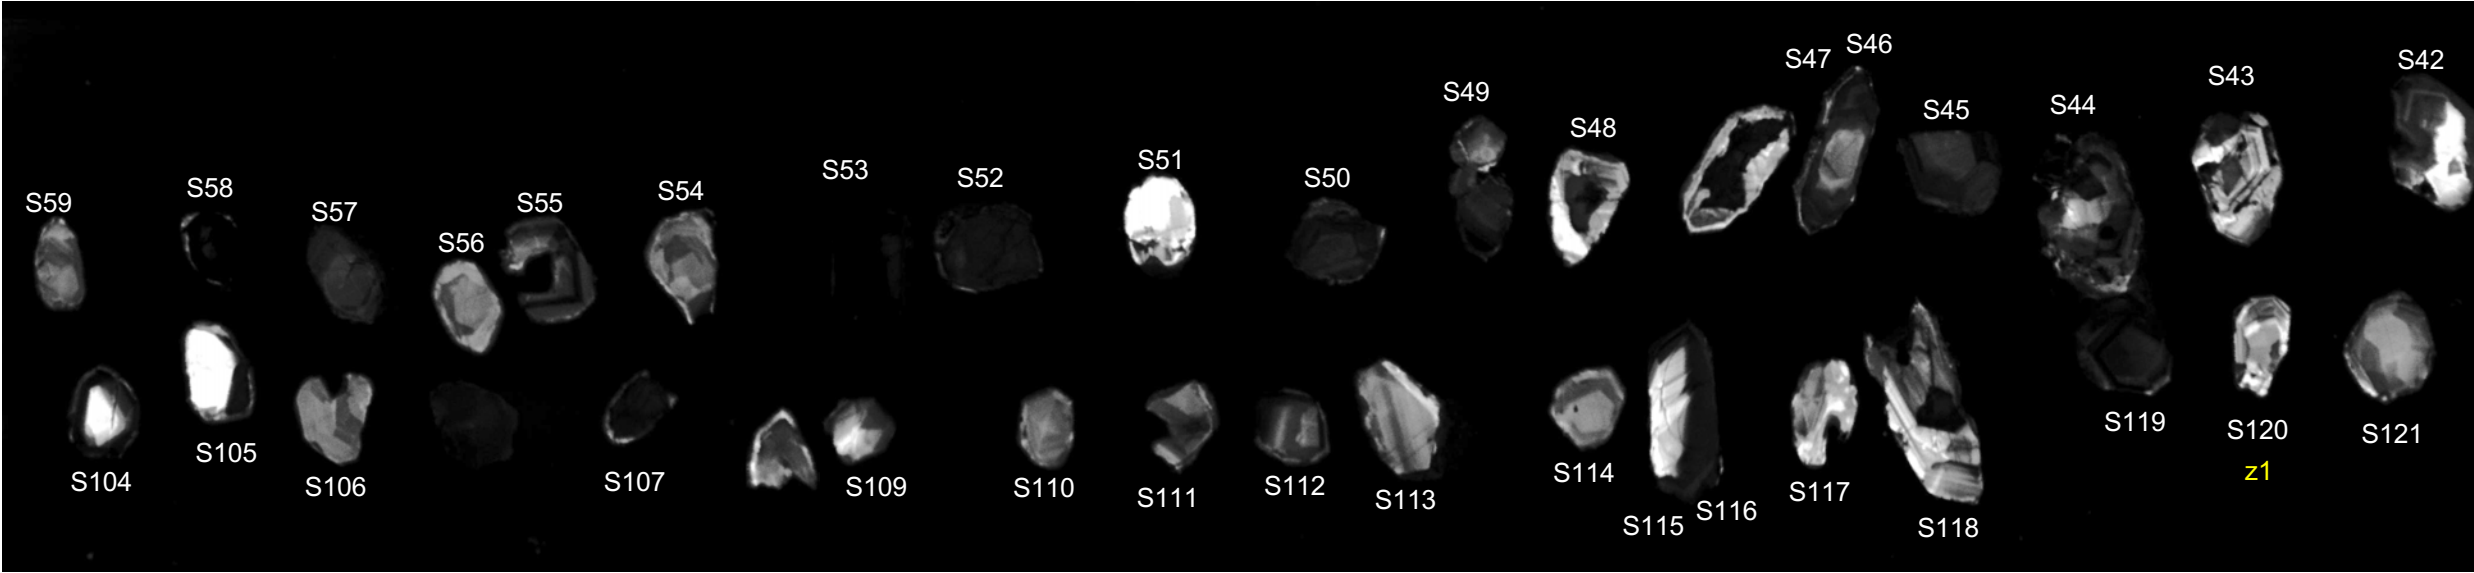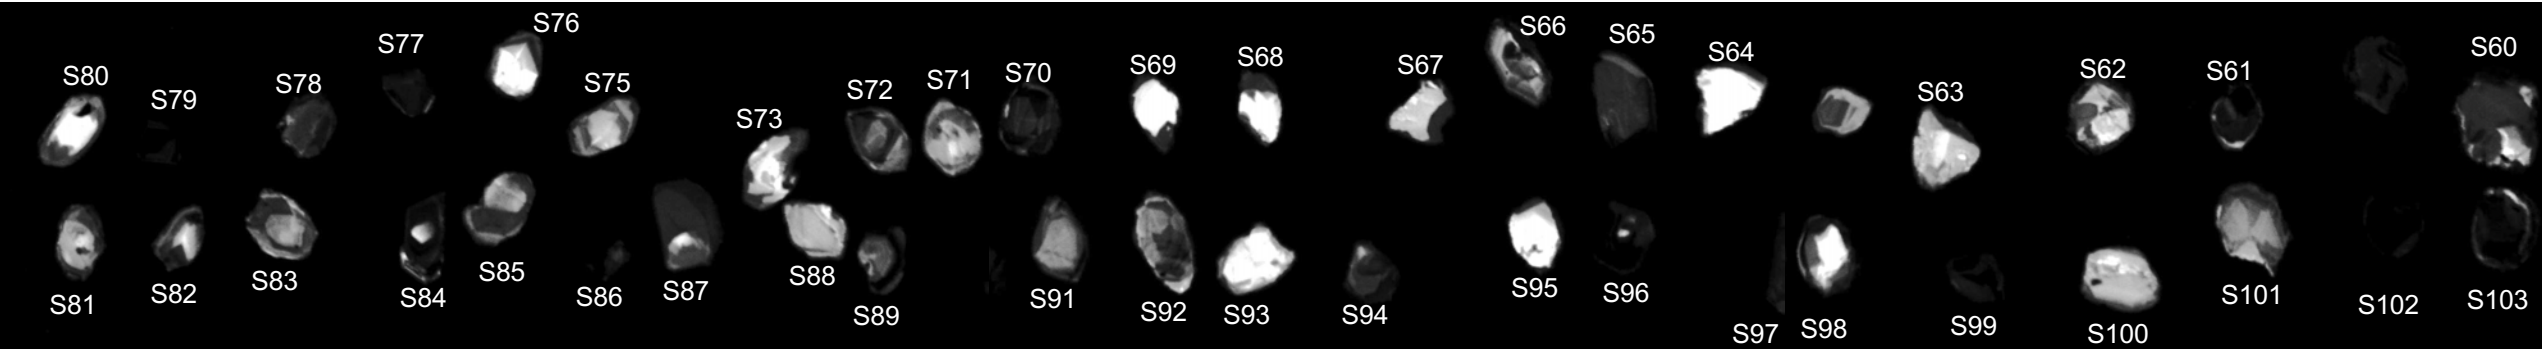

**B1557 Cormacks Lake Complex, Small Grains**

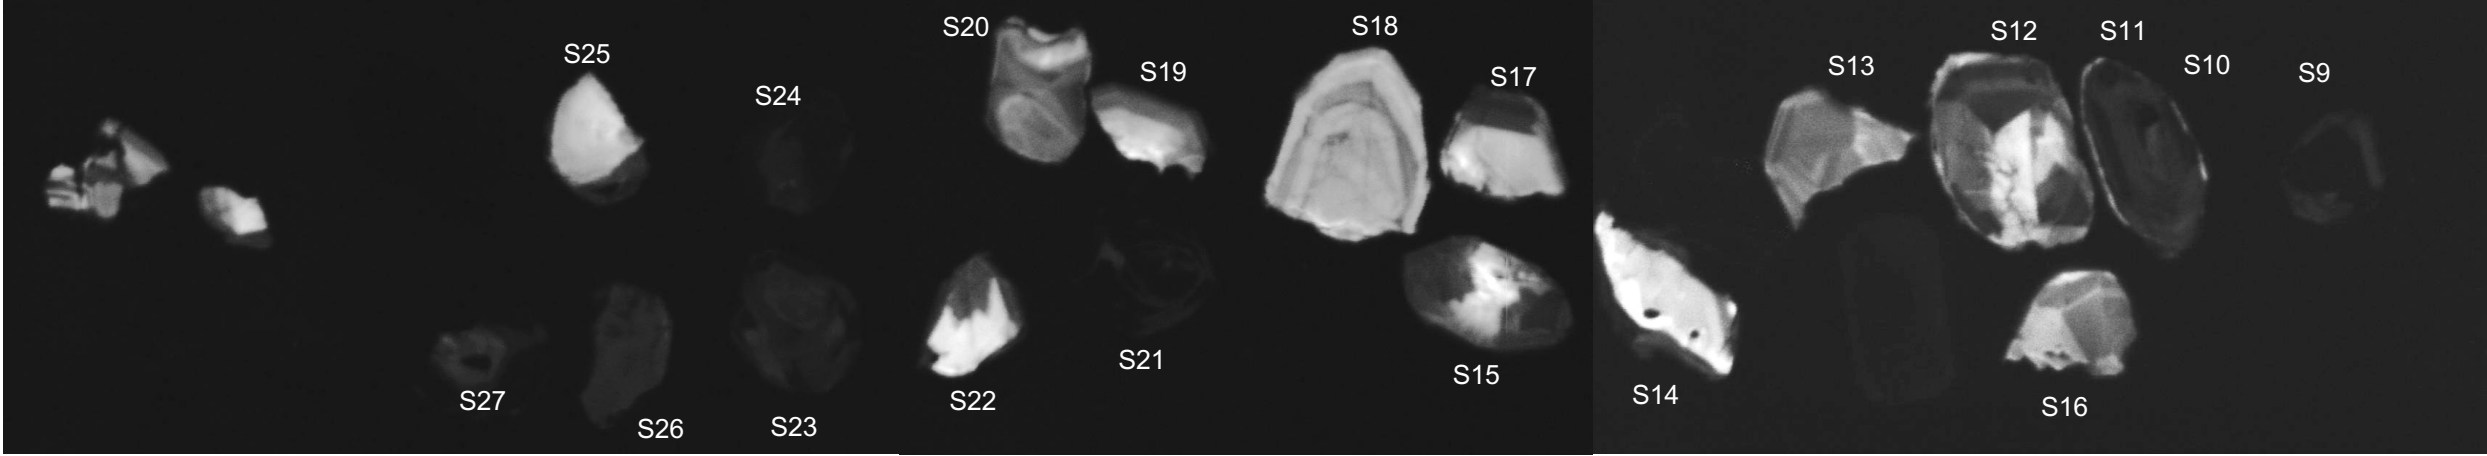

**B1557 Cormacks Lake Complex, Medium Grains**

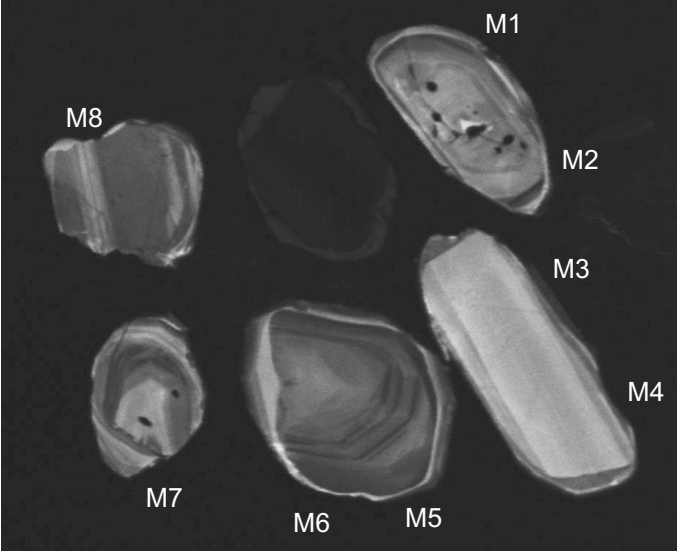

**B1559 Cormacks Lake Complex, Small Grains**

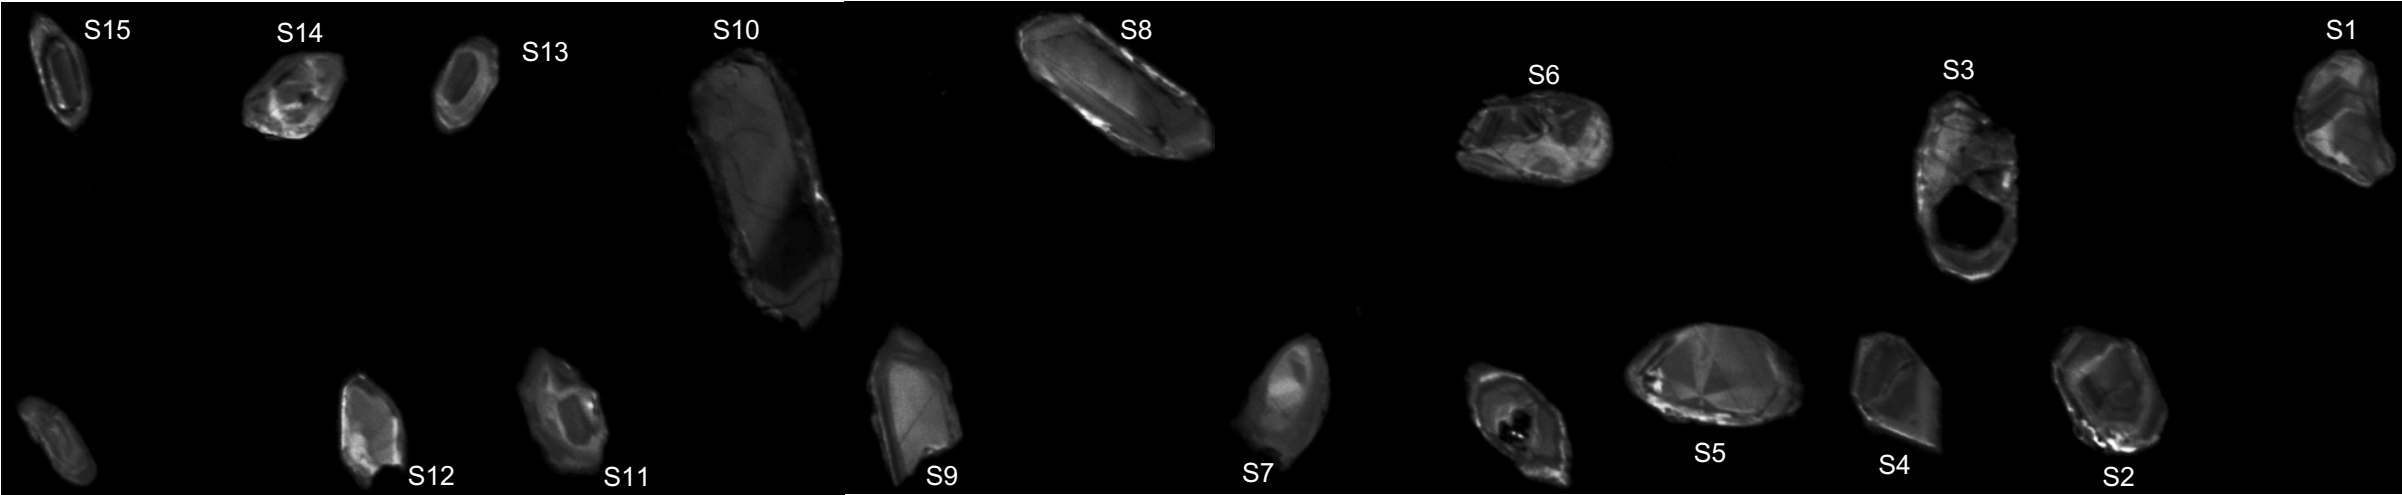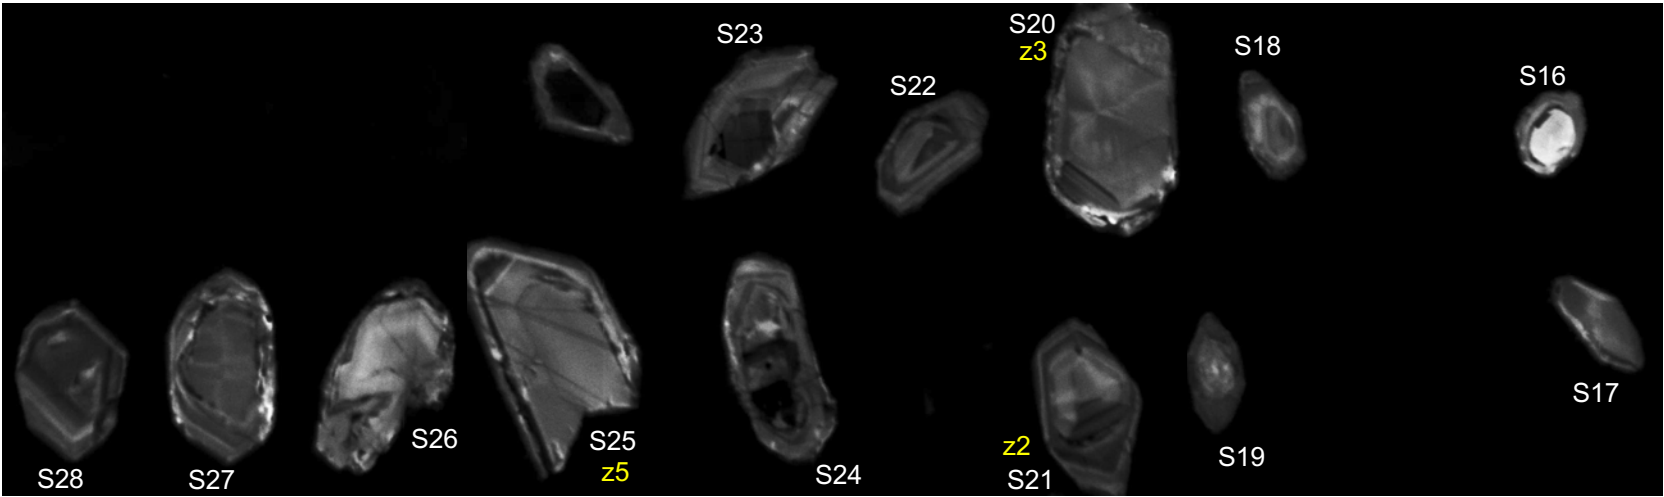

**B1557 Cormacks Lake Complex, Small Grains**

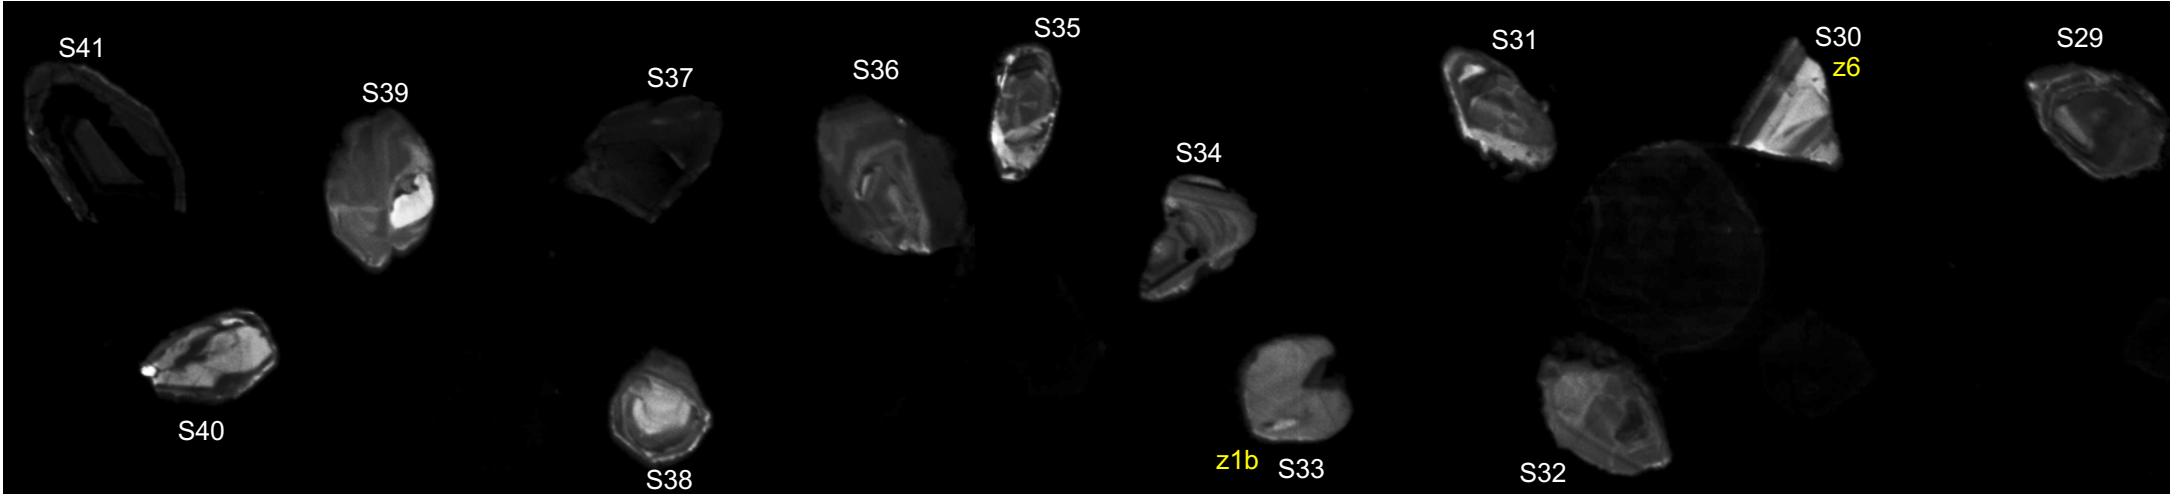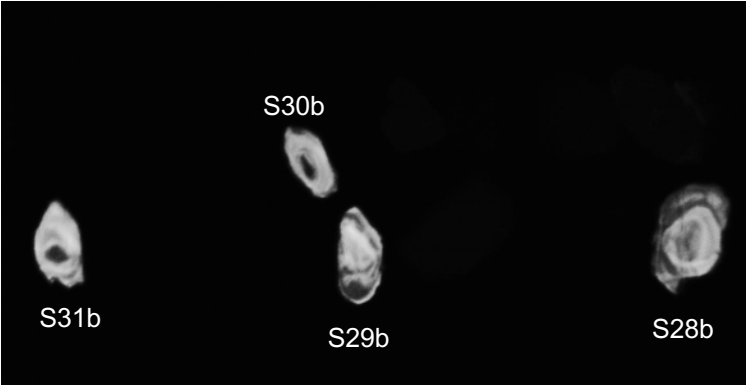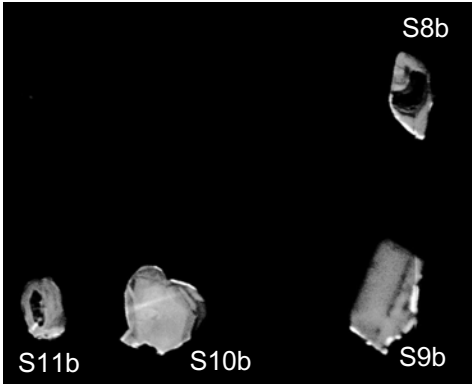



## NLJP01 Dennis Pond Complex, Large grains

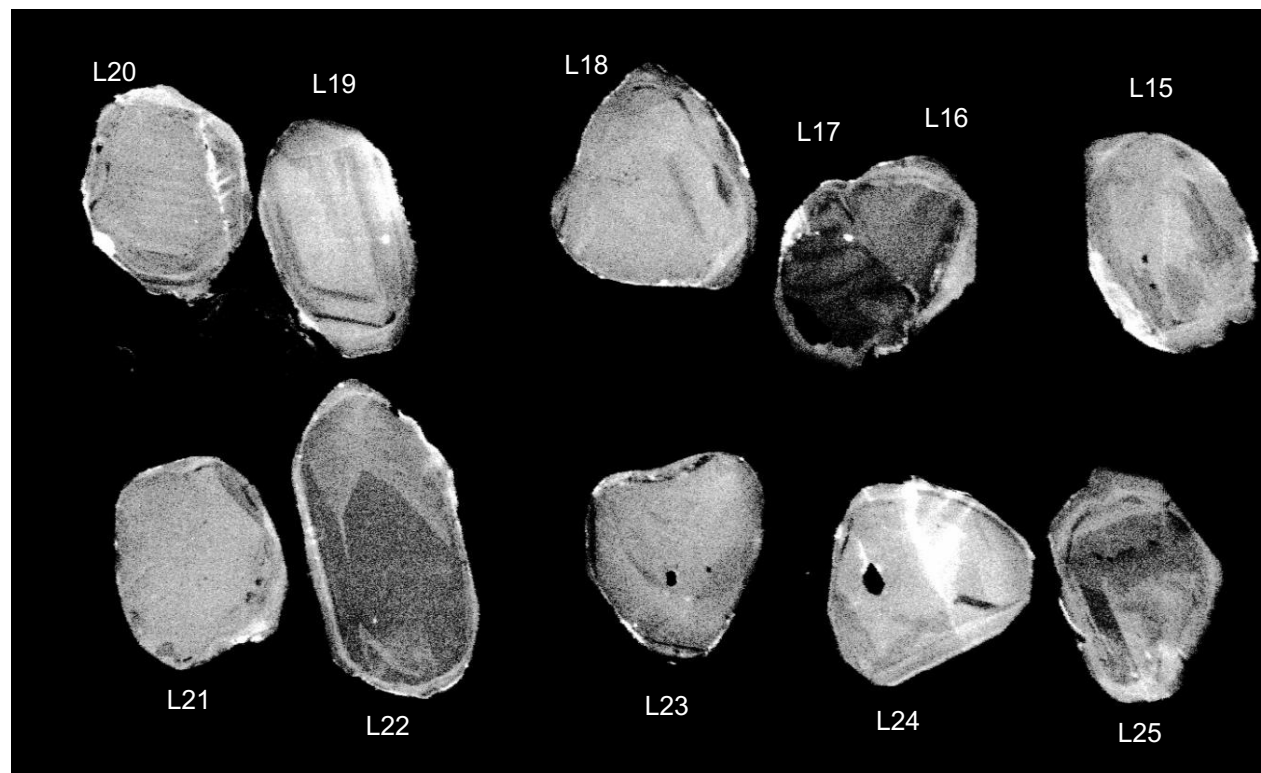

## NLJP01 Dennis Pond Complex, Medium grains

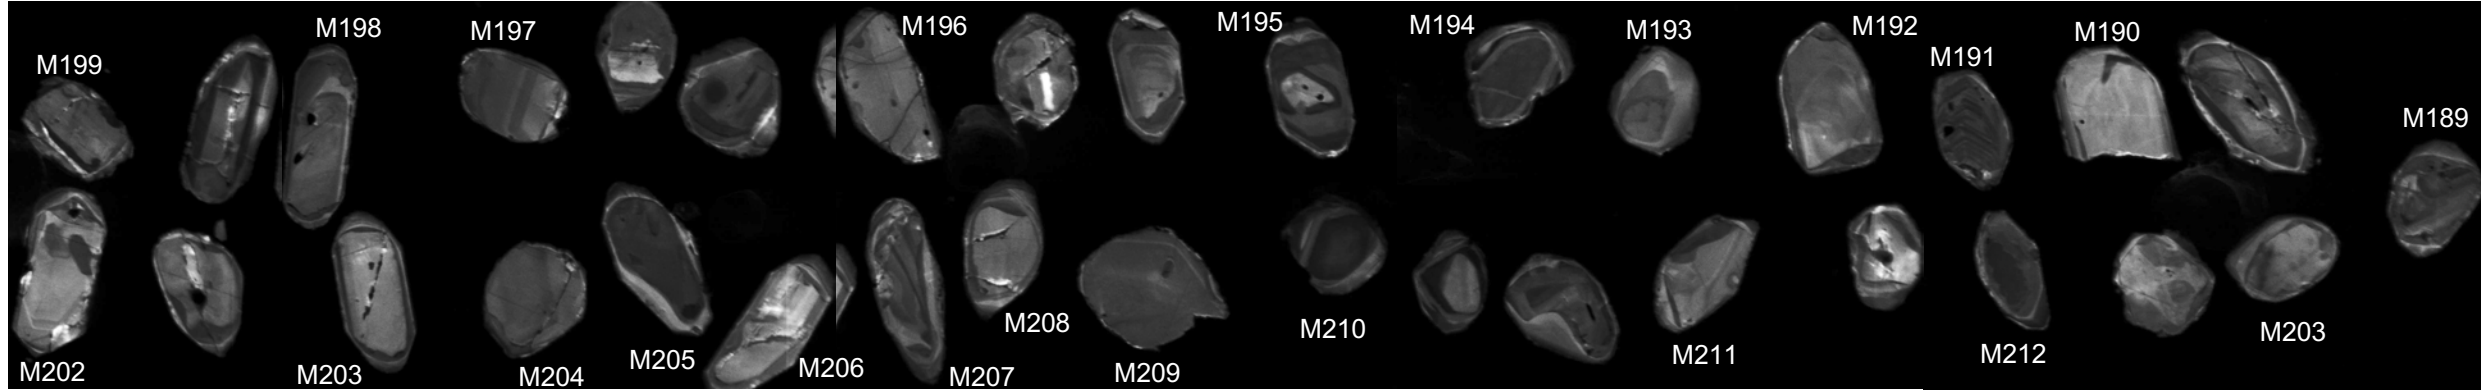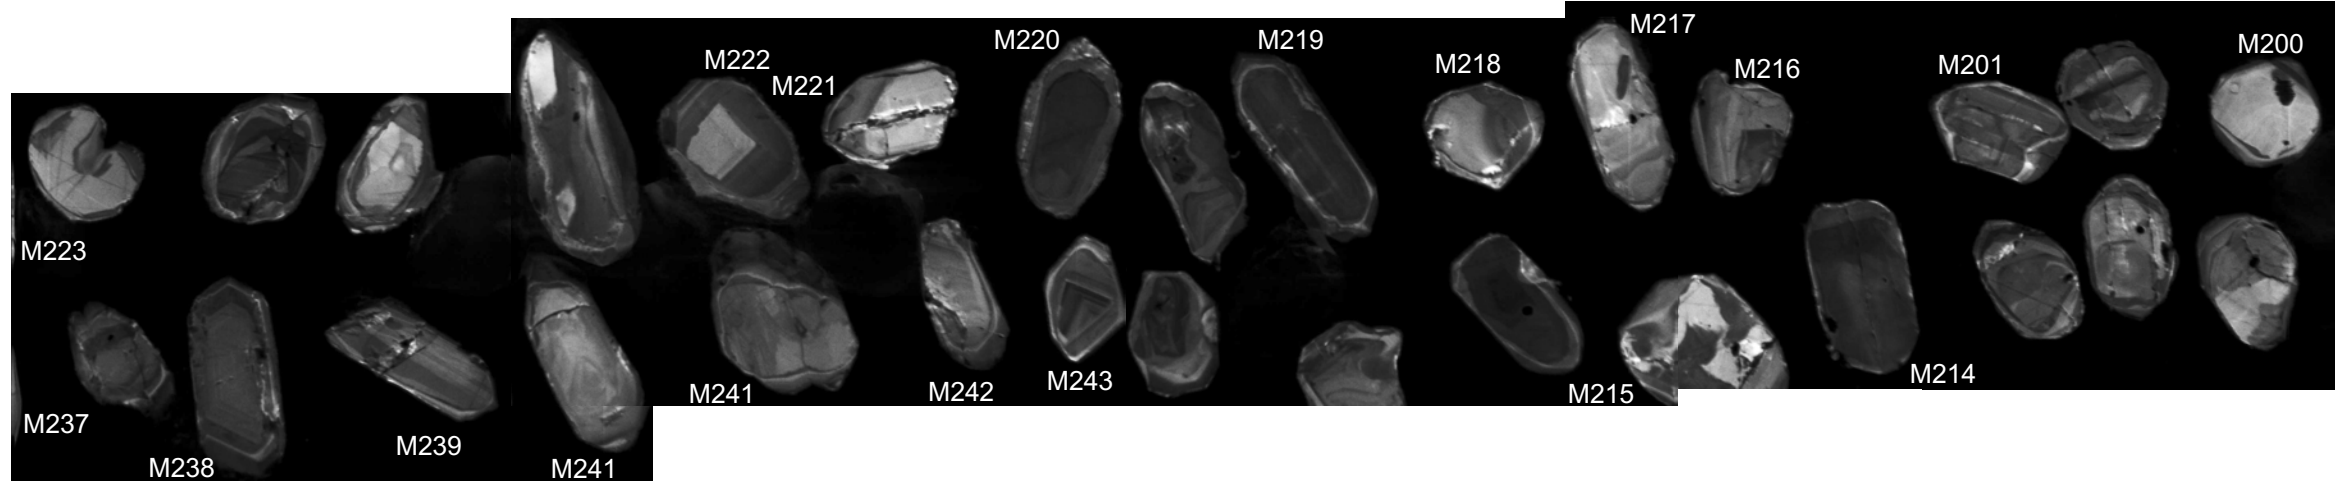

## NLJP01 Dennis Pond Complex, Medium grains

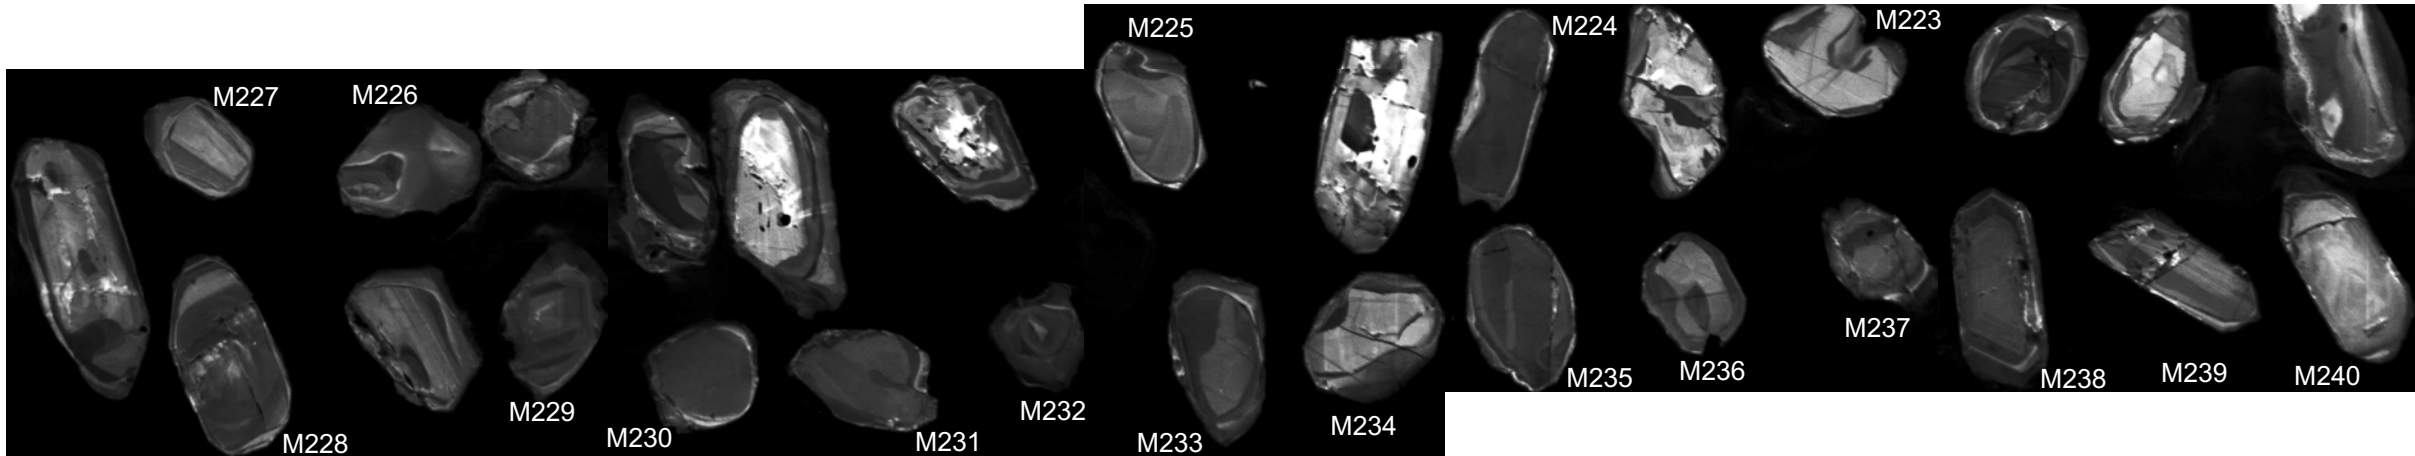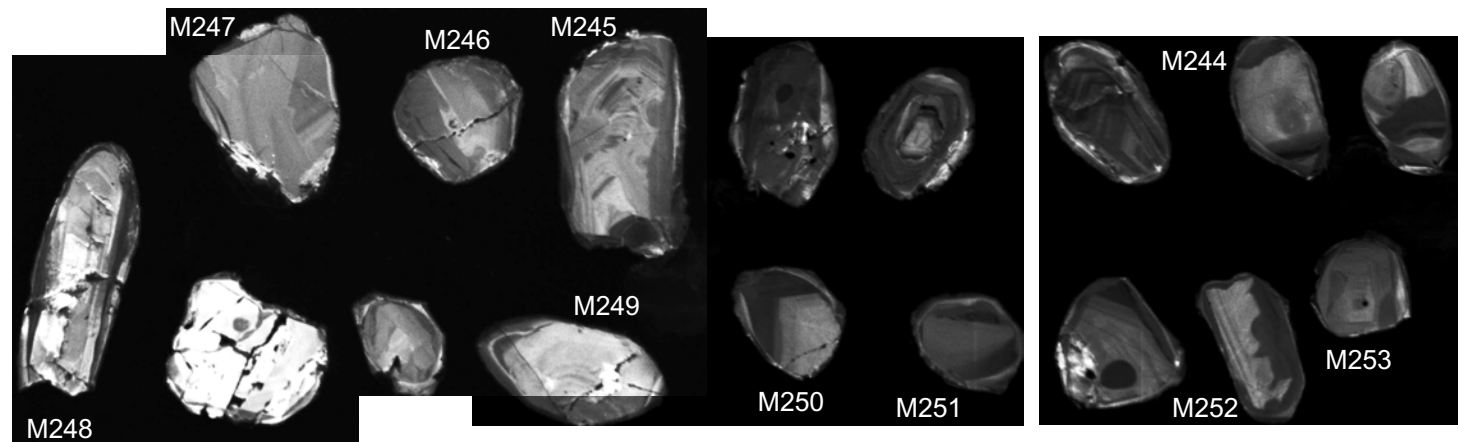

# NLJP01 Dennis Pond Complex, Medium grains

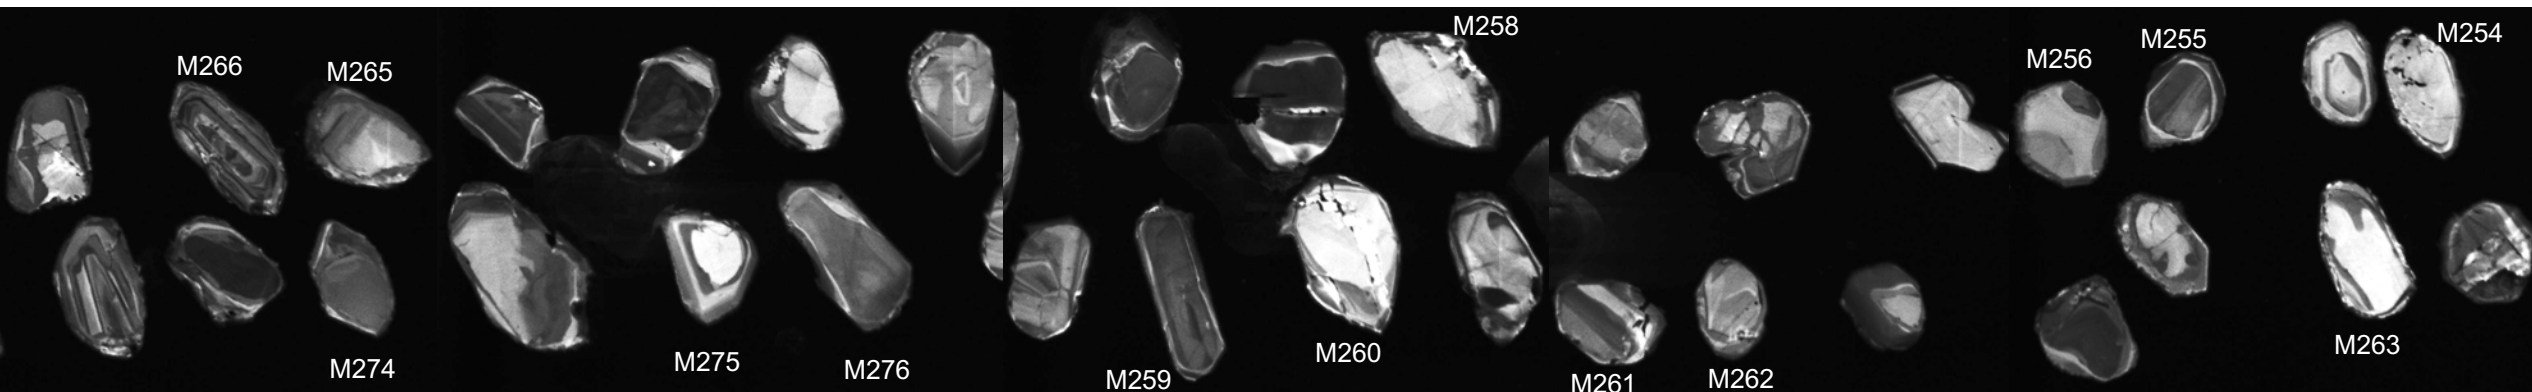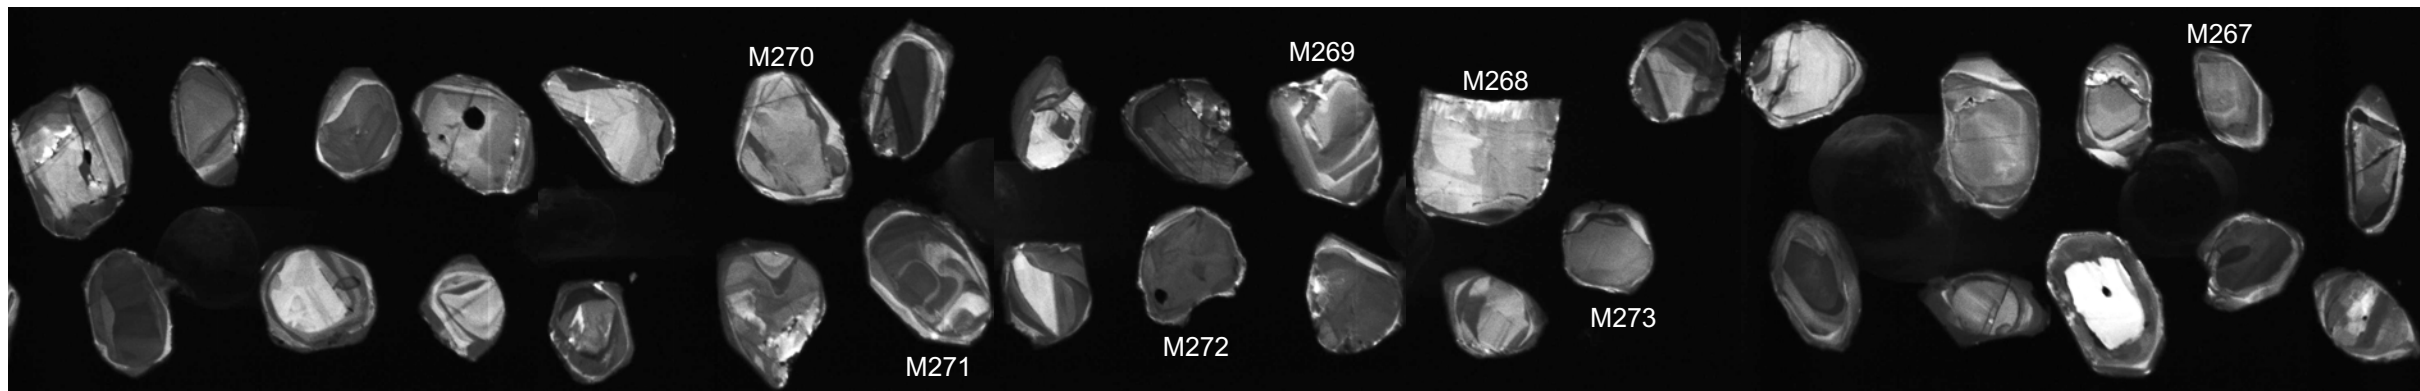

# NLJP01 Dennis Pond Complex, Small grains

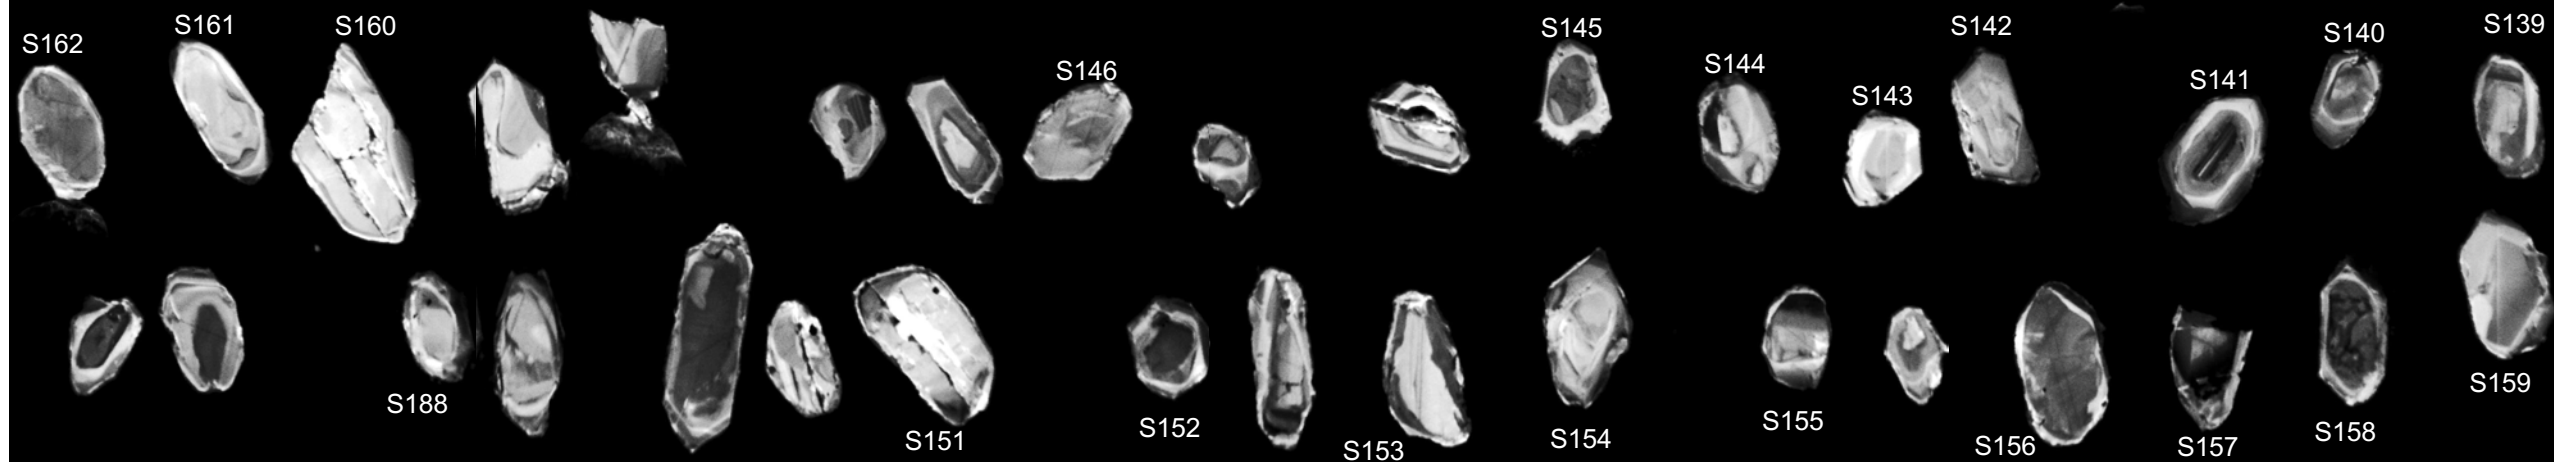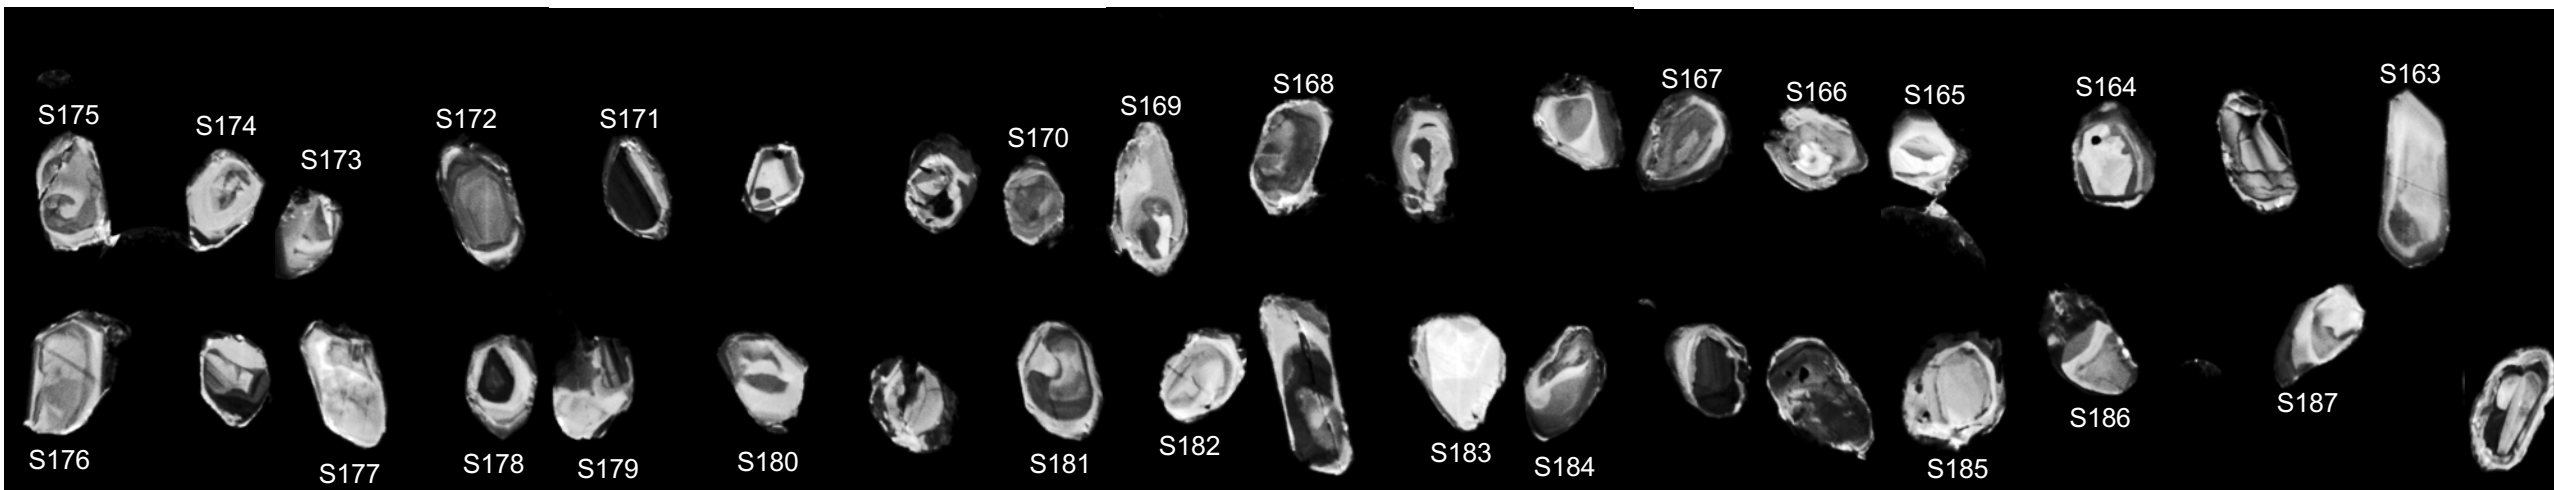

# NLJP02 Dennis Pond Complex, Large grains

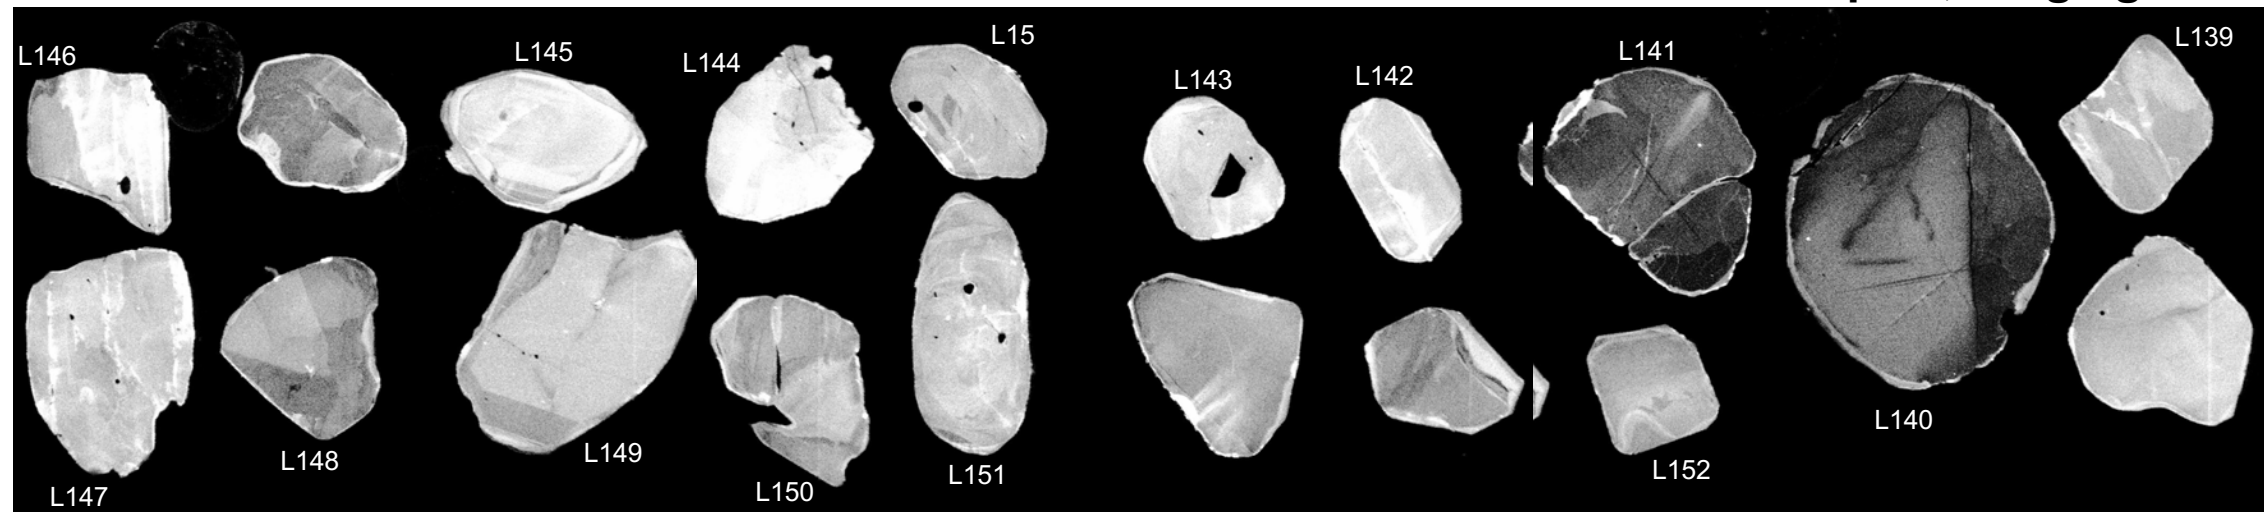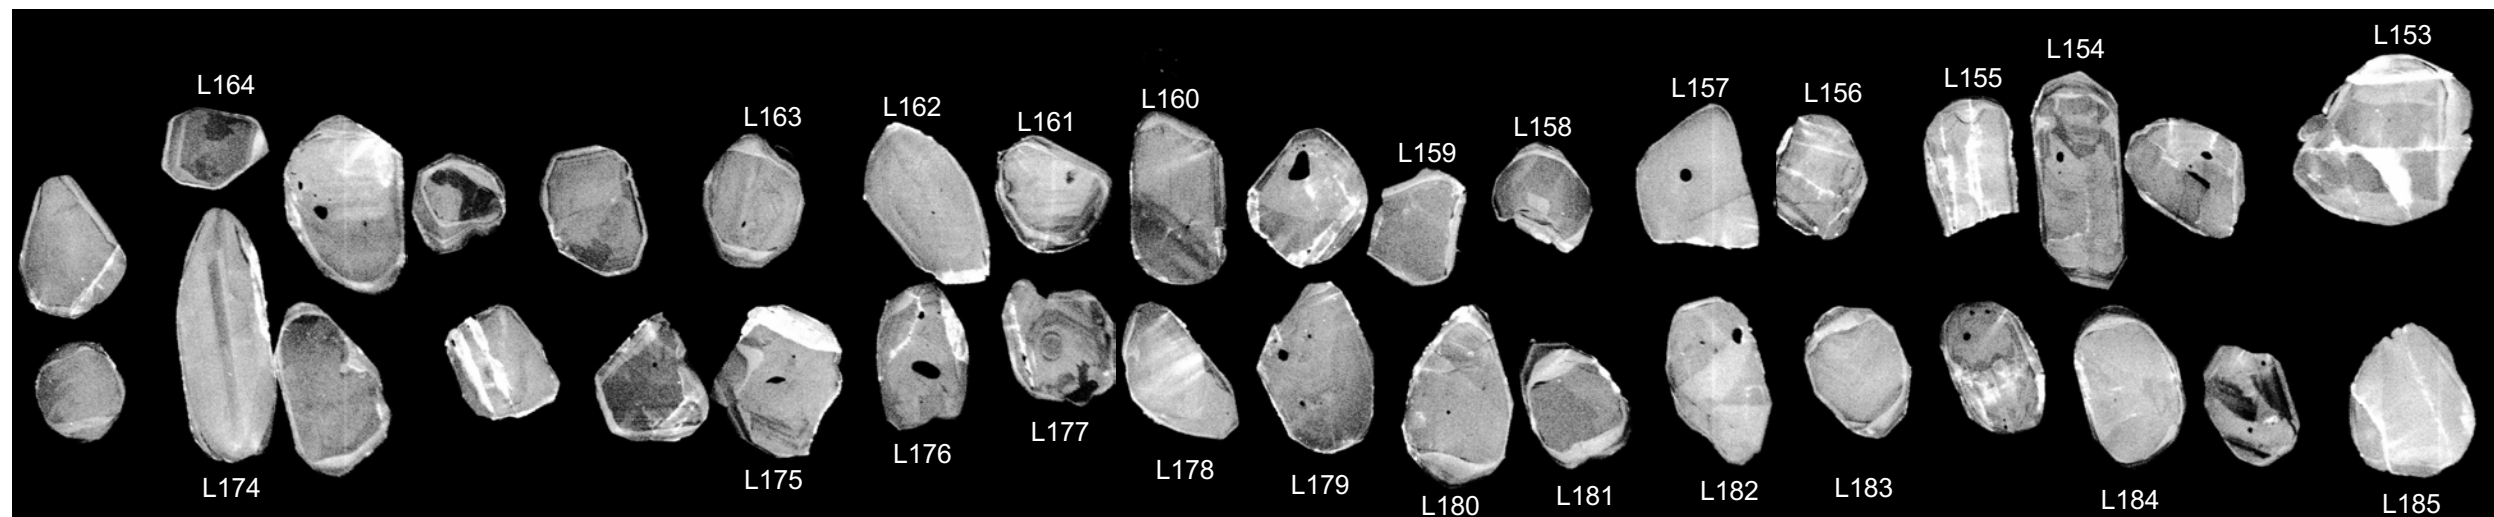

## NLJP02 Dennis Pond Complex, Large grains

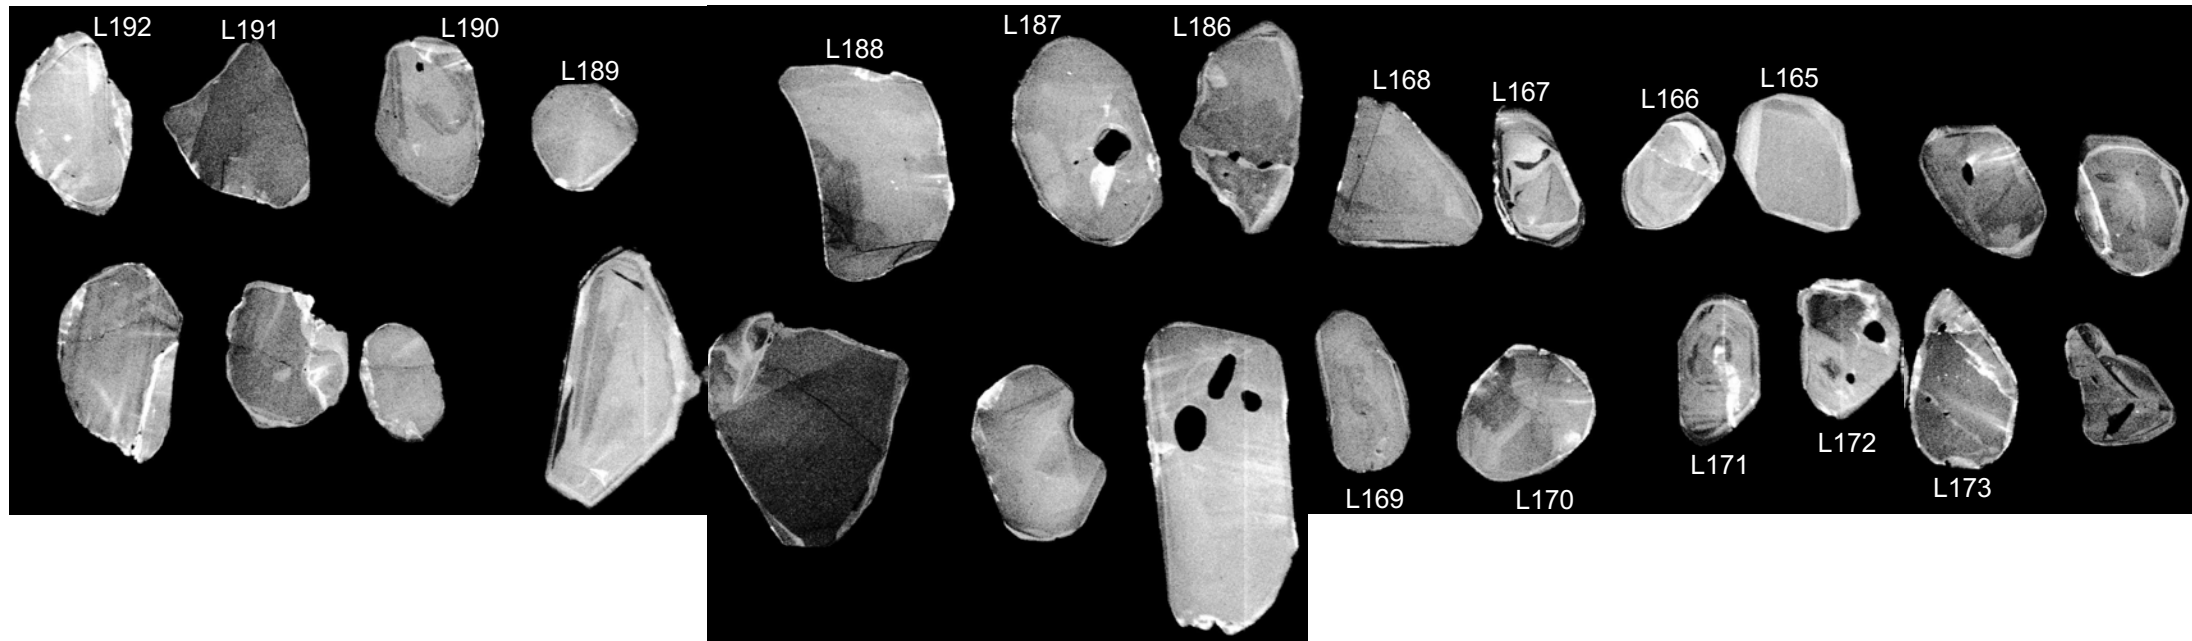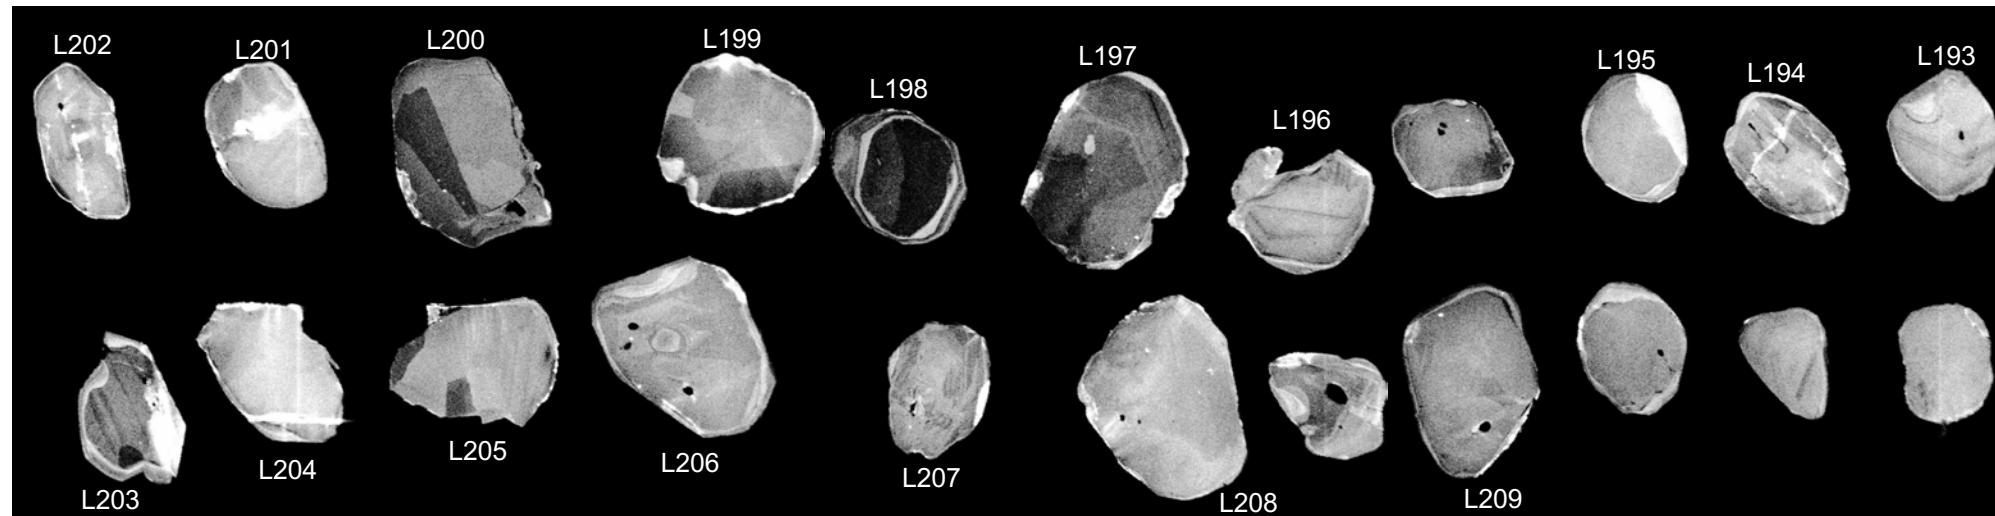

## NLJP02 Dennis Pond Complex, Medium grains

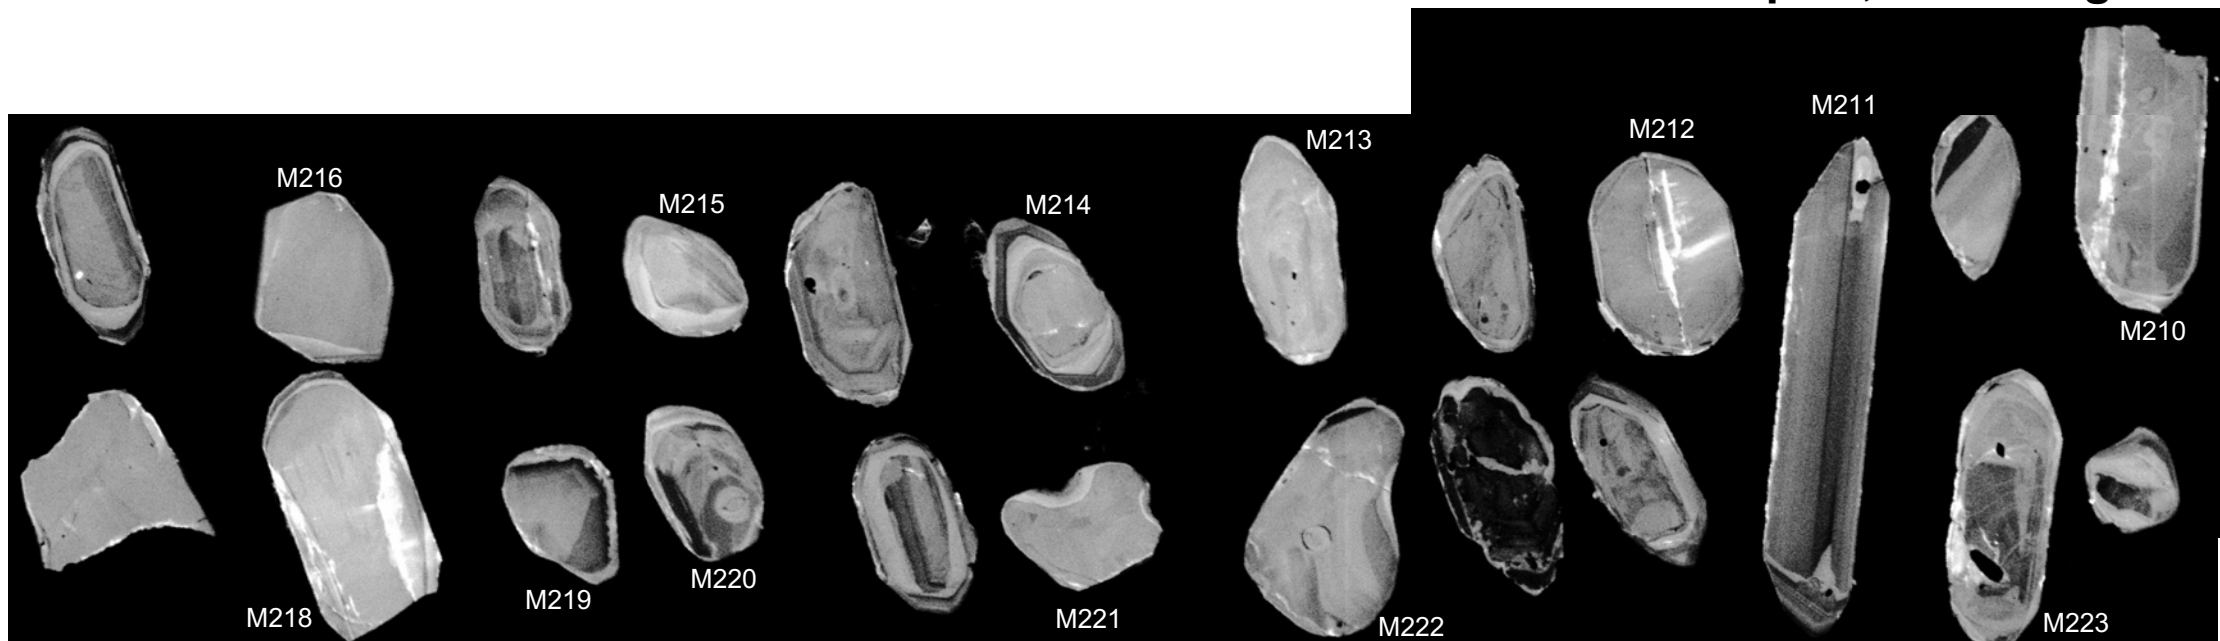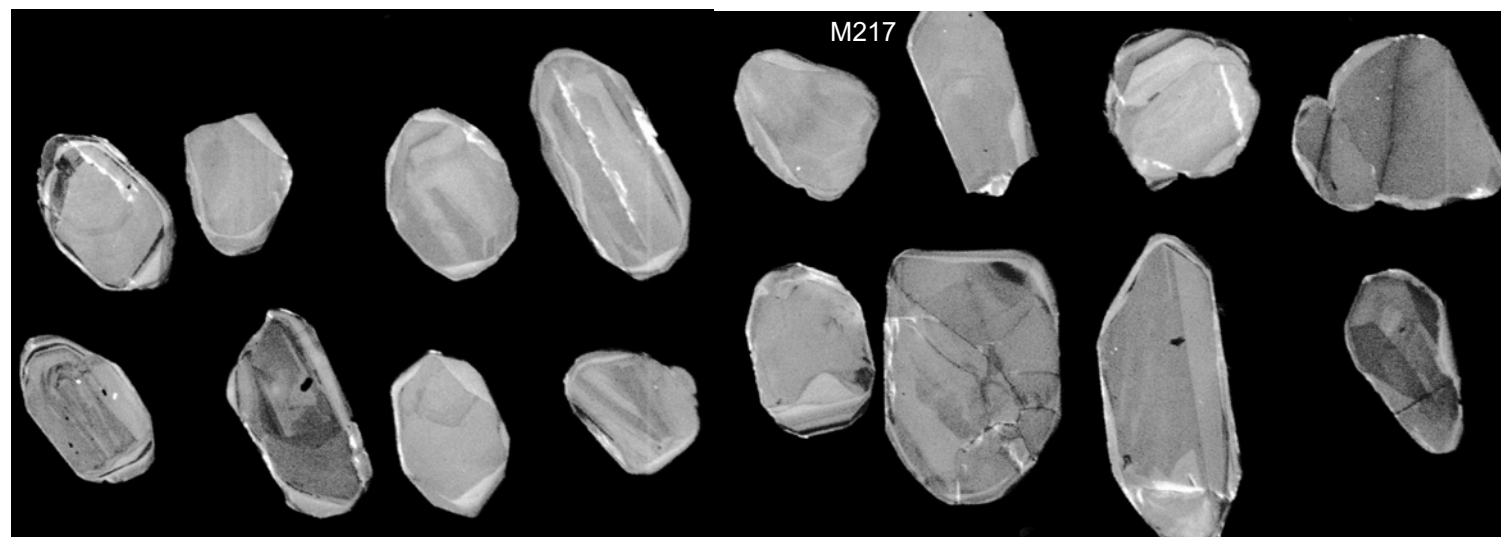



## NLJP02 Dennis Pond Complex, Medium grains

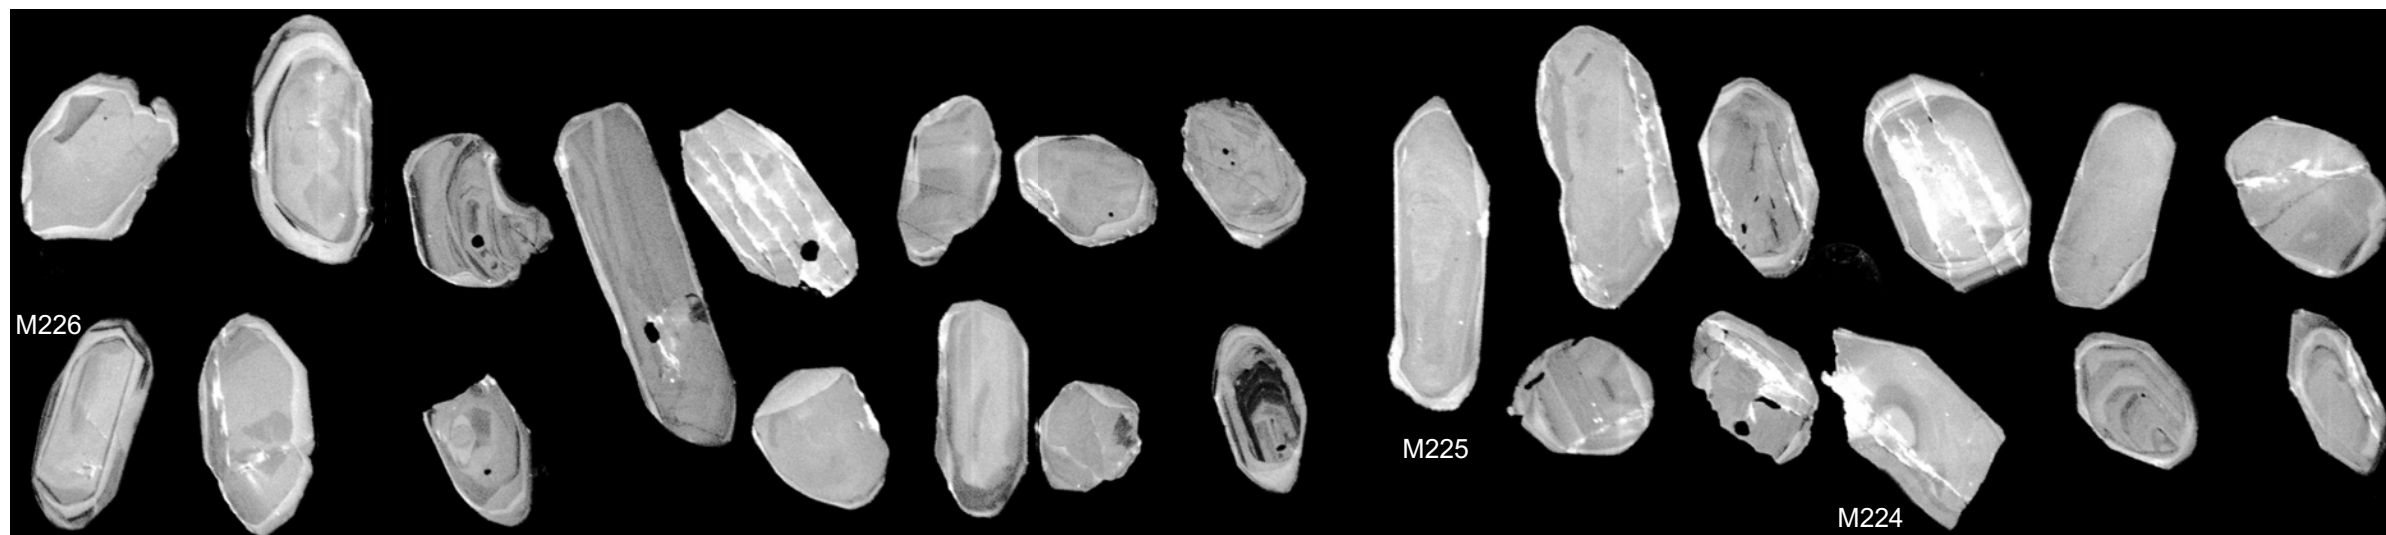

## NLJP02 Dennis Pond Complex, Small grains

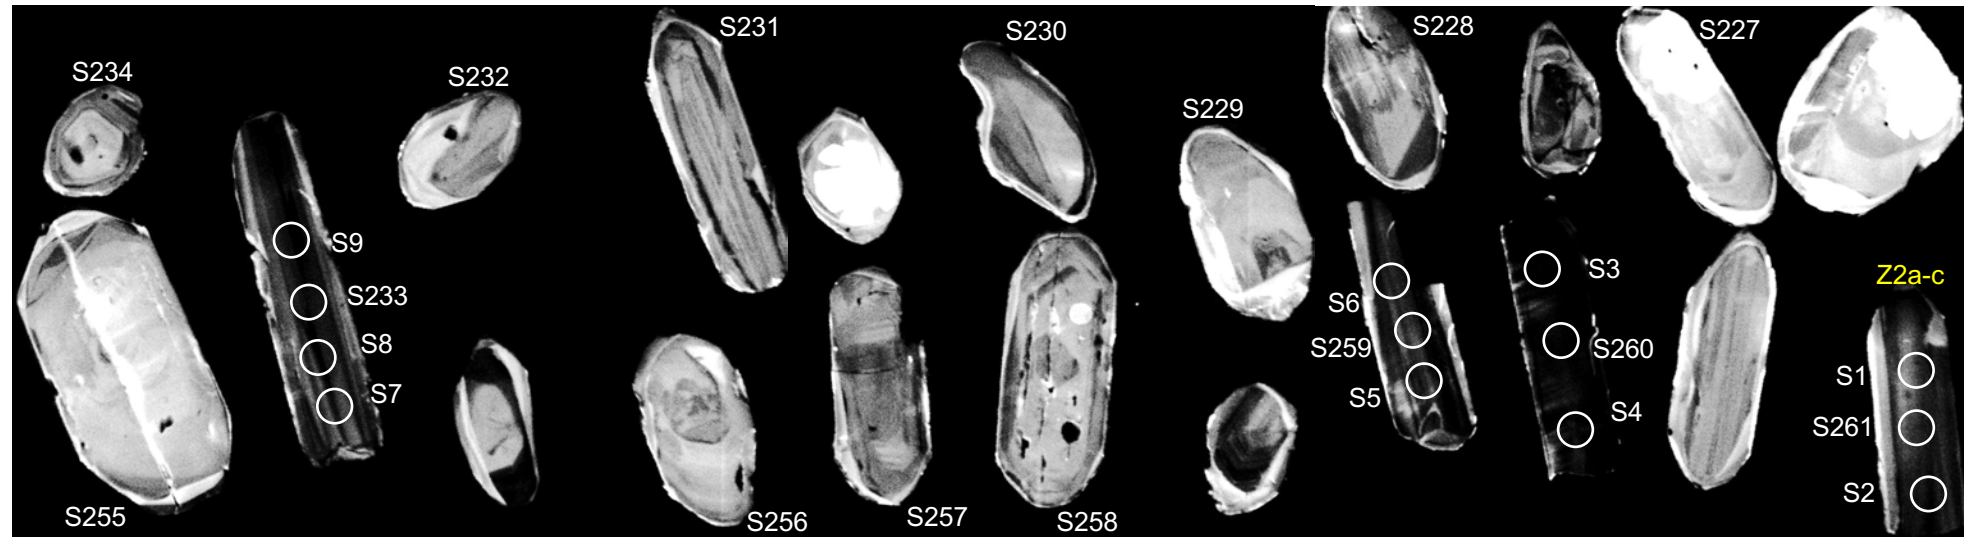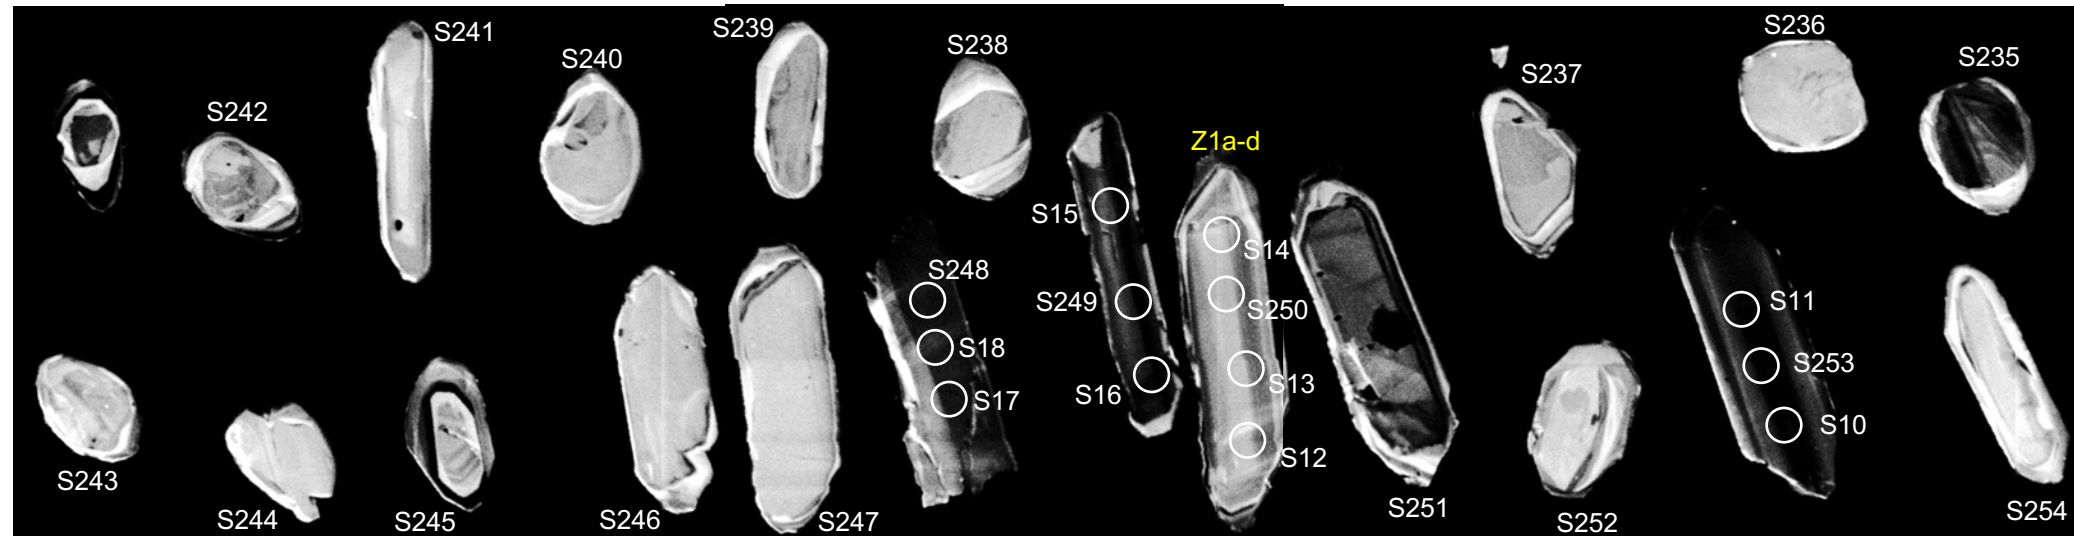

## NLJP02 Dennis Pond Complex, Small grains

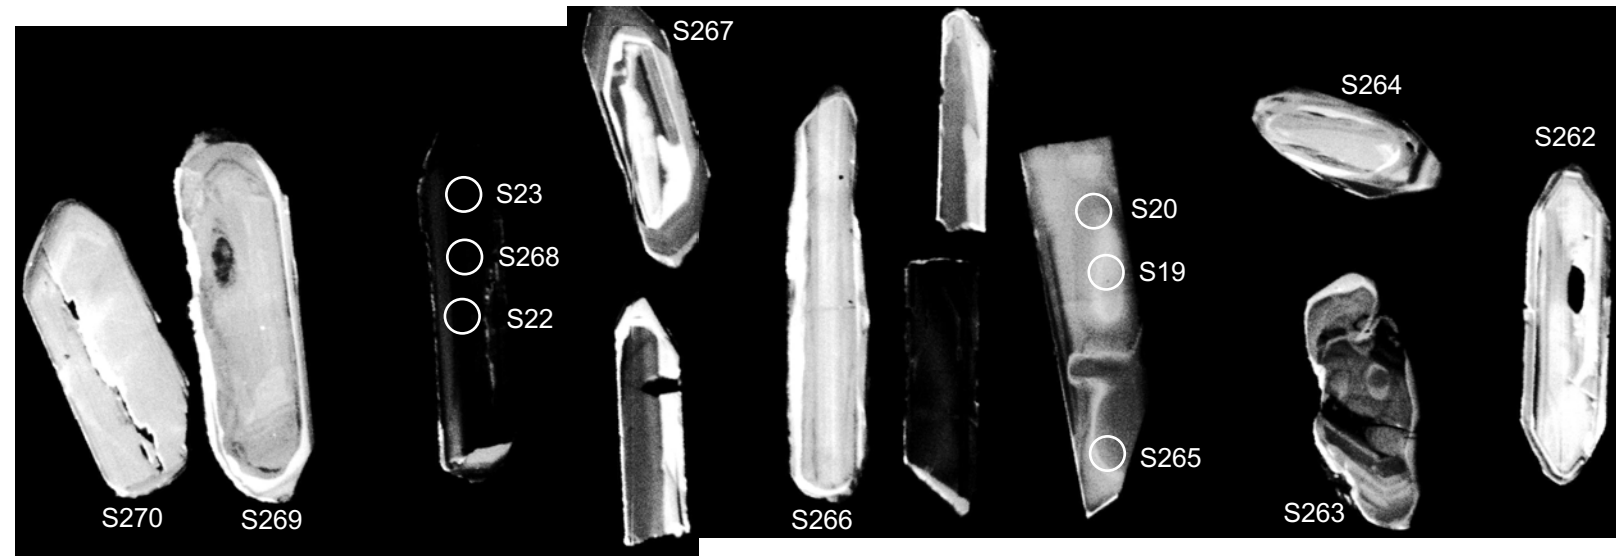

B1721A Dennis Pond Complex Xenolith at Bill Shears Pond, Large grains

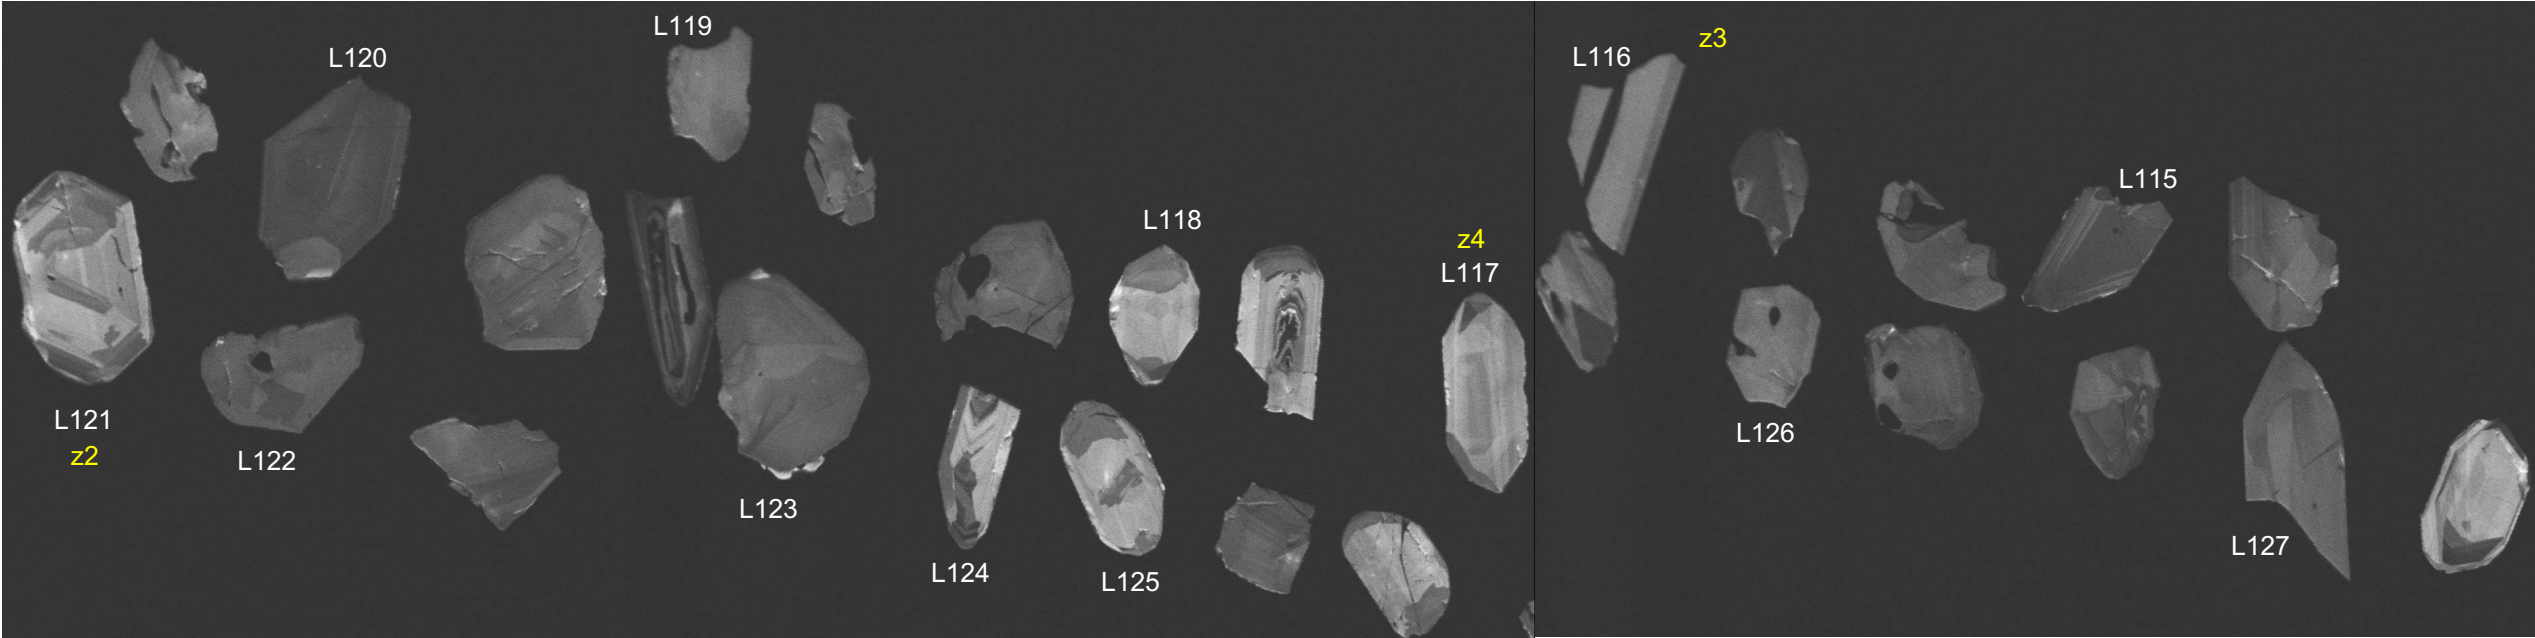

**B1721A Dennis Pond Complex Xenolith at Bill Shears Pond, Medium grains**

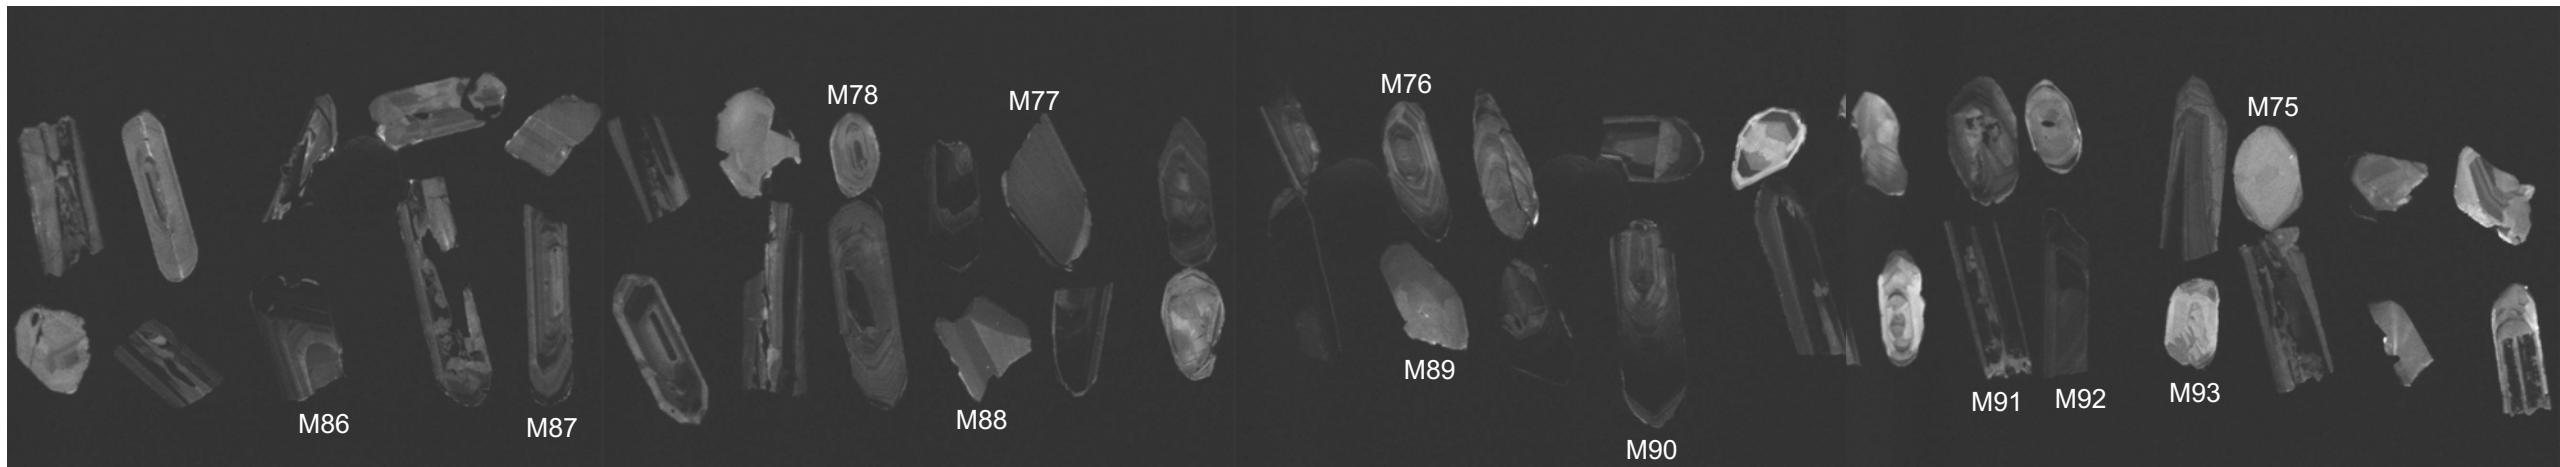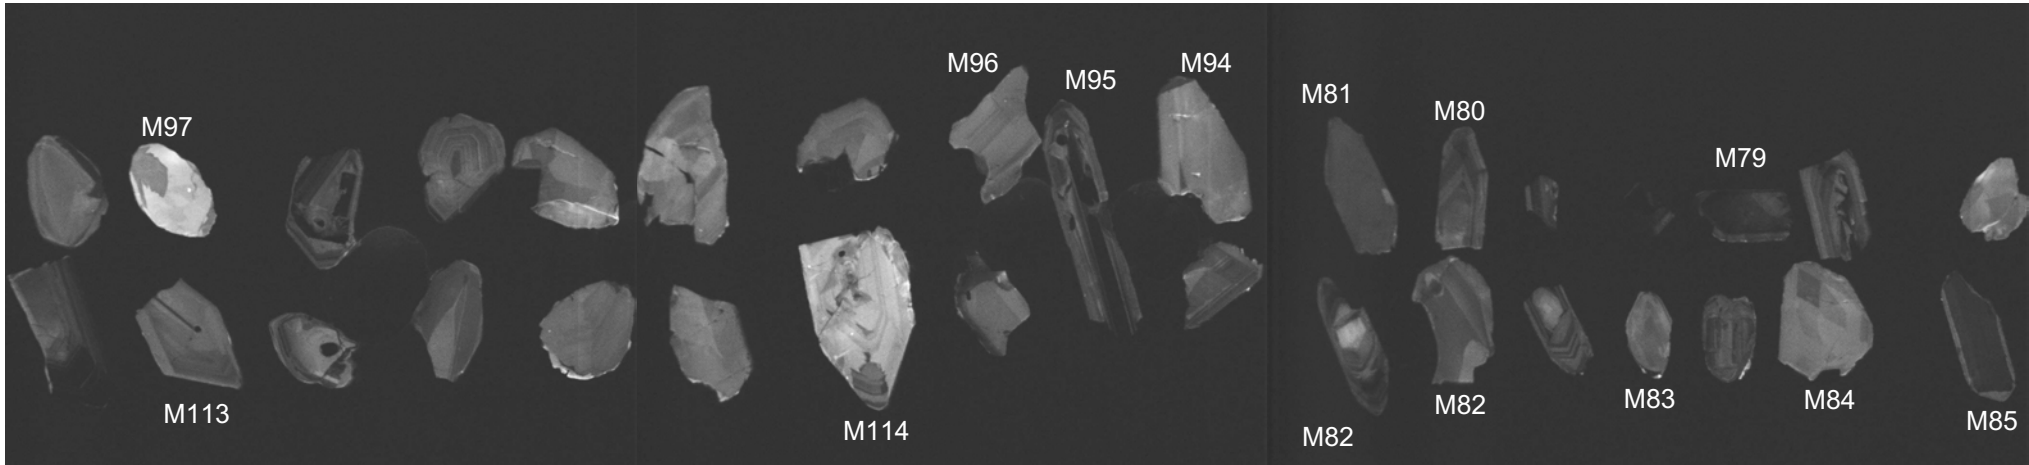

## B1721A Dennis Pond Complex Xenolith at Bill Shears Pond, Medium grains

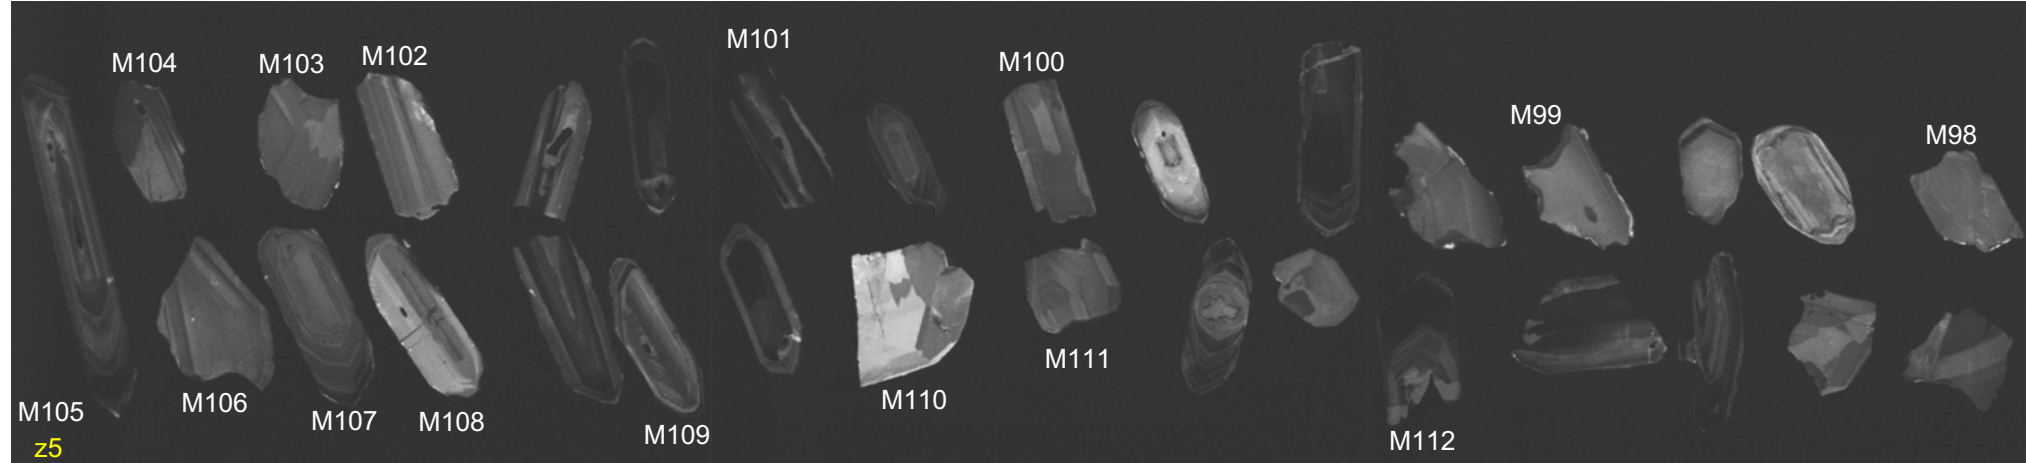



# B1721A Dennis Pond Complex Xenolith at Bill Shears Pond, Small grains

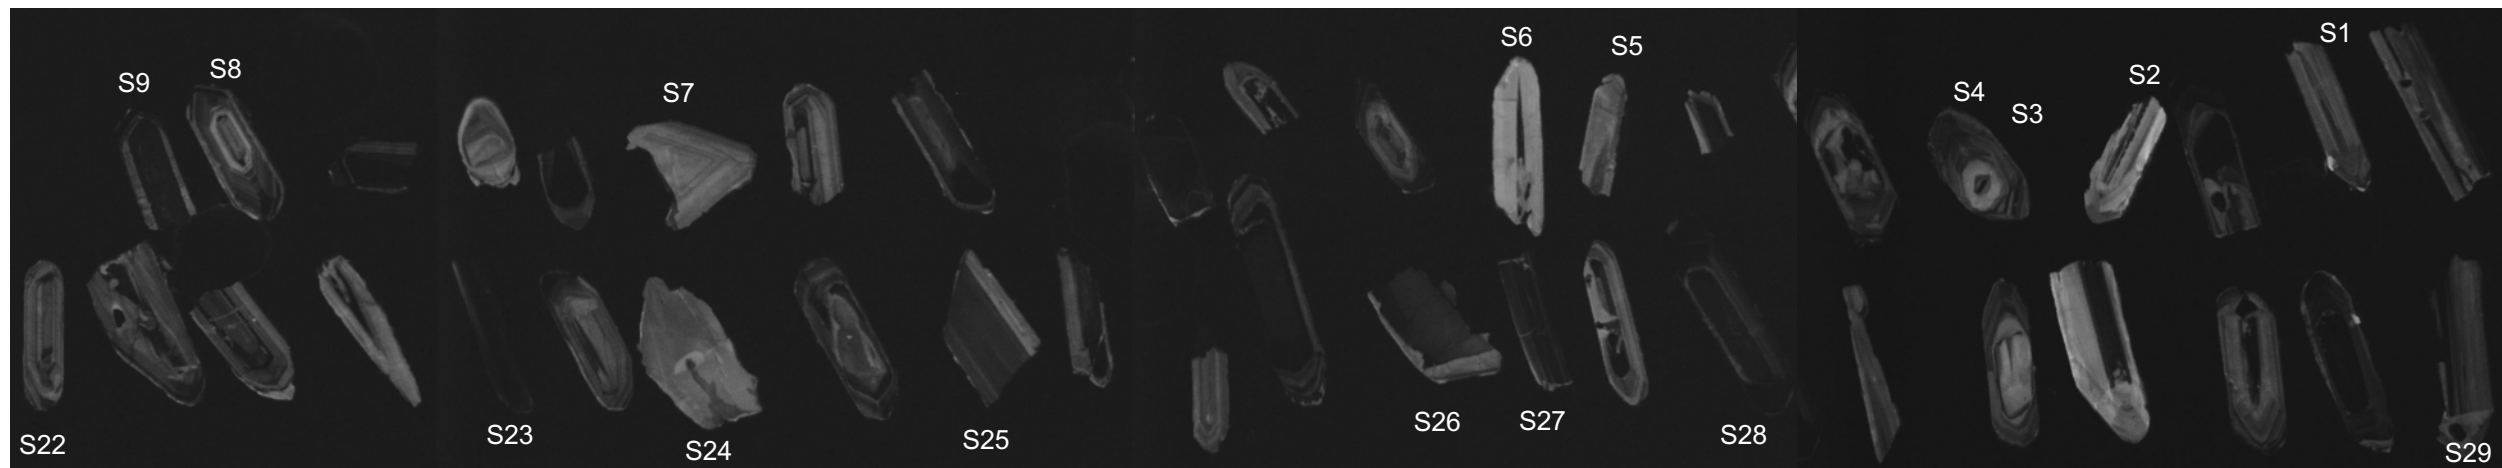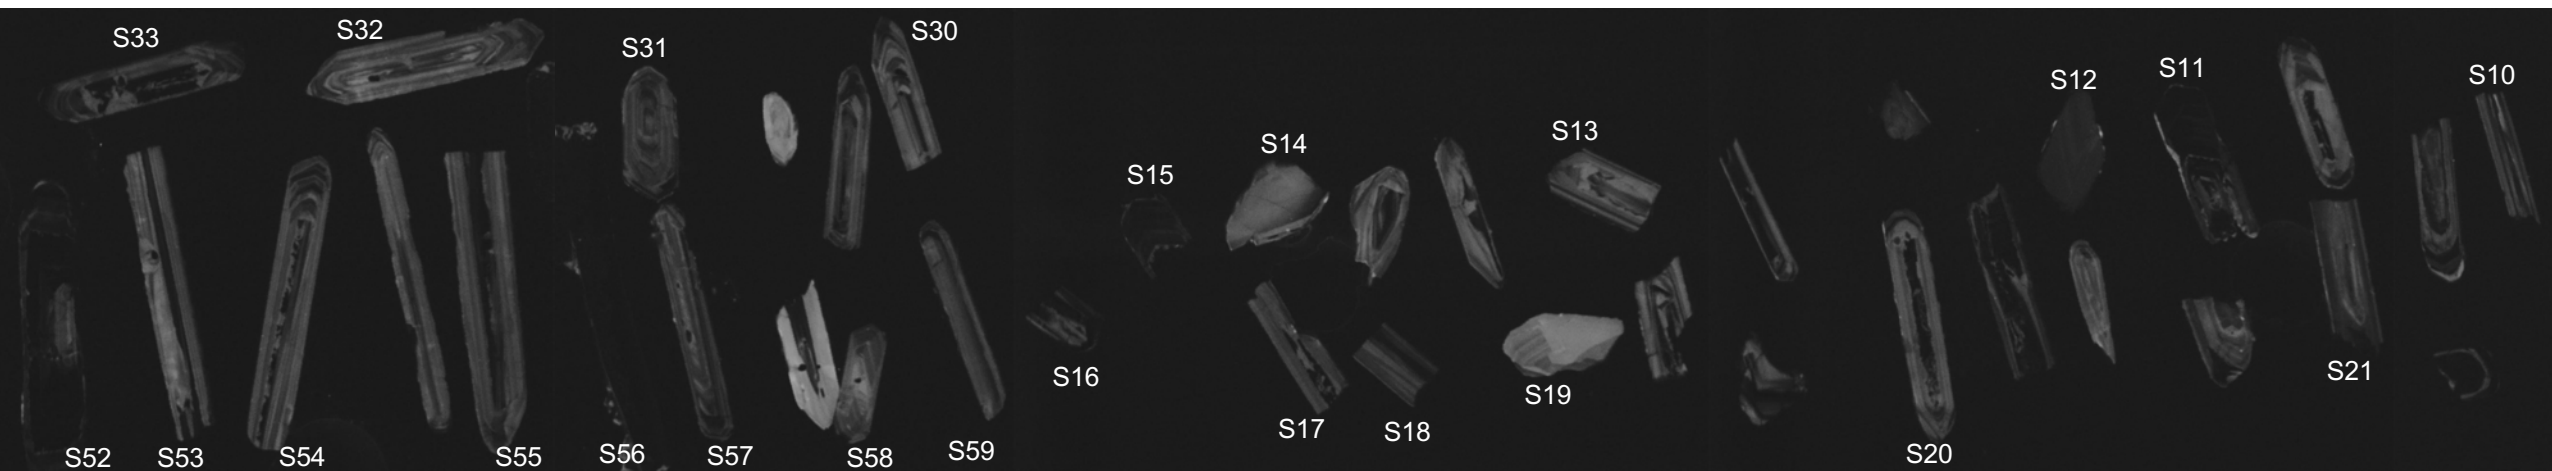

**B1721A Dennis Pond Complex Xenolith at Bill Shears Pond, Small grains**

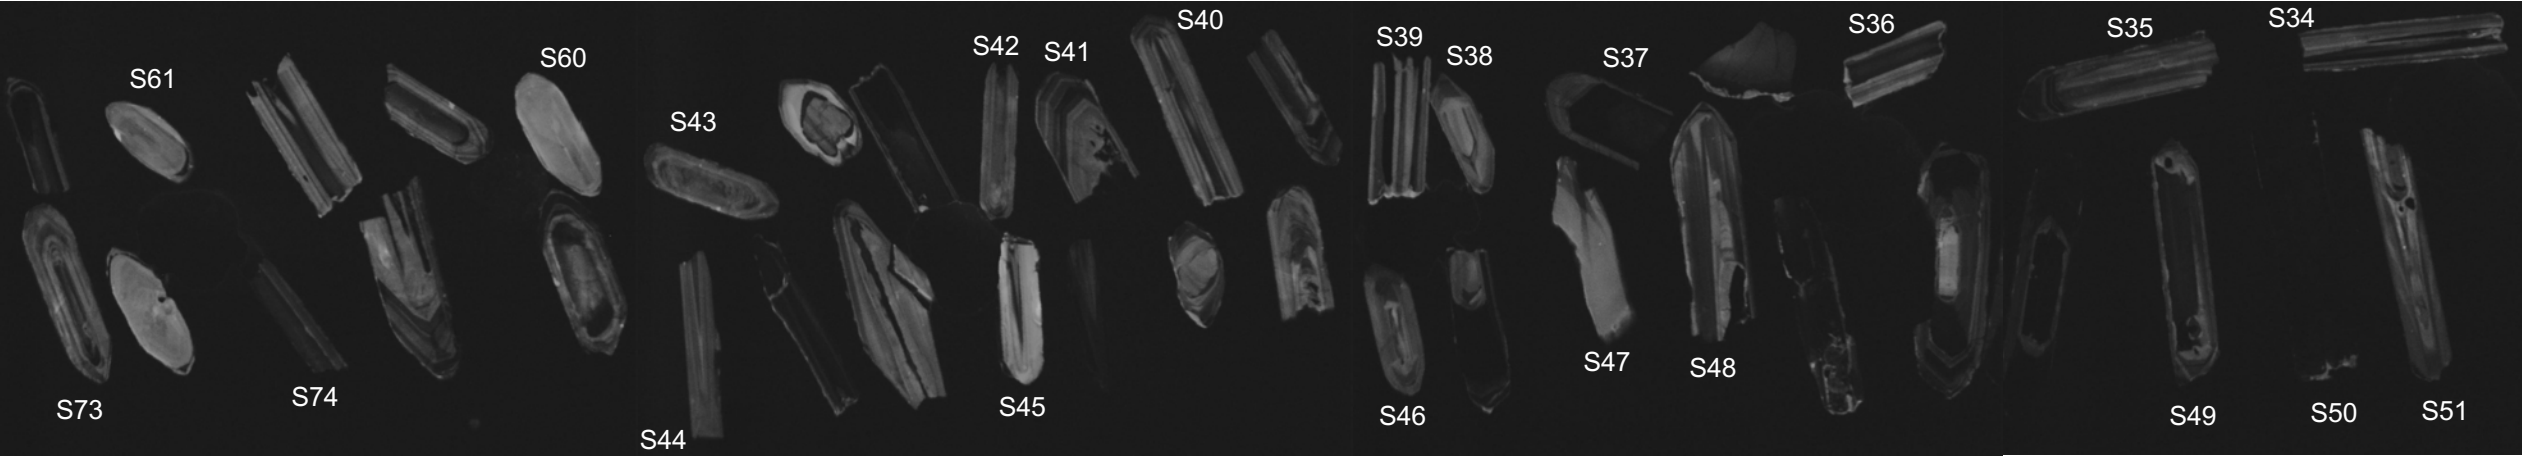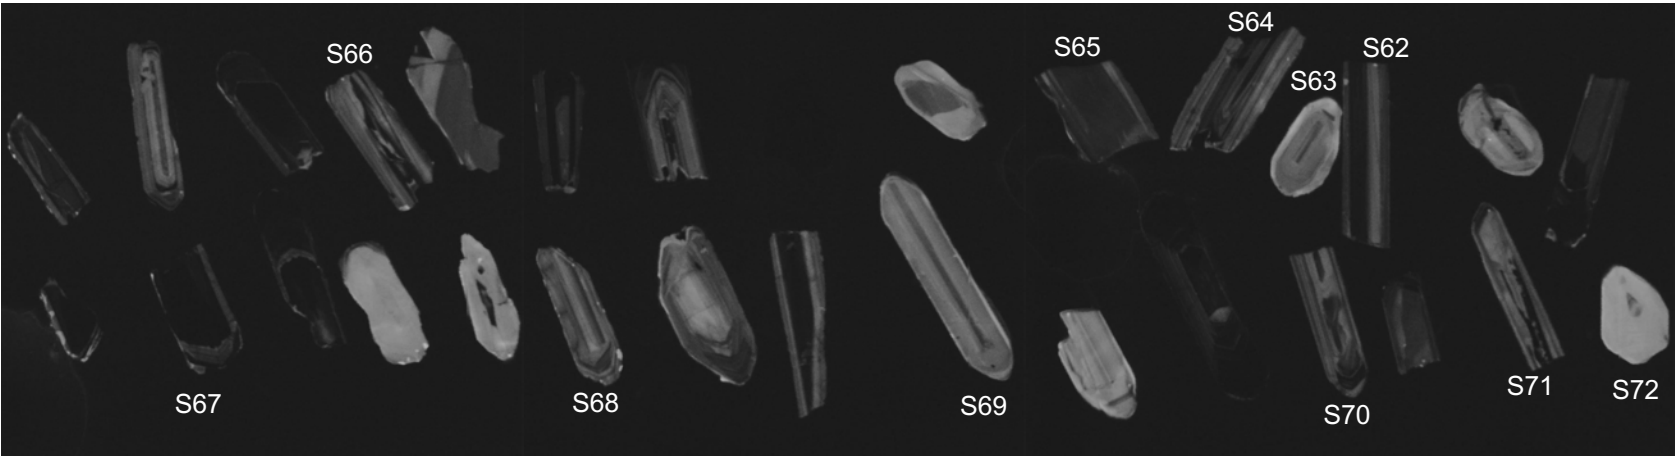



CP1803 Mischief mélange at Litte Codroy Pond, Medium grains

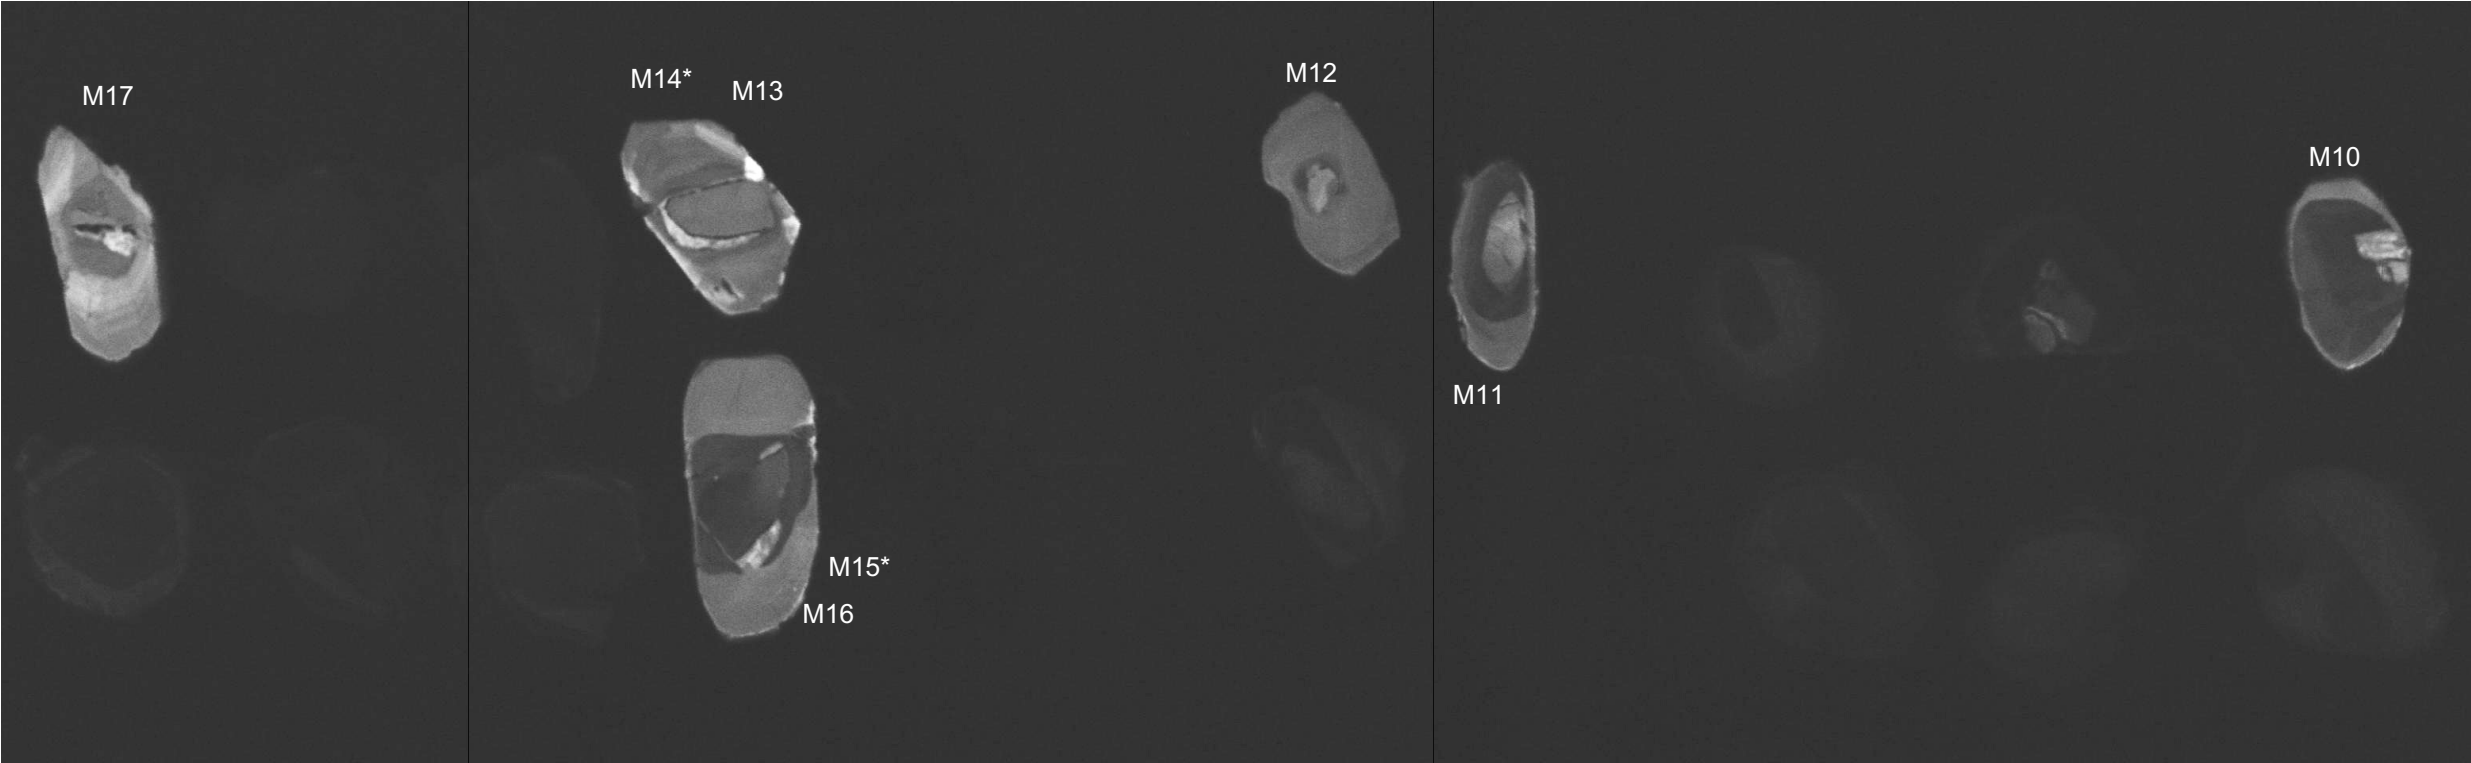

# CP1803 Mischief mélange at Litte Codroy Pond, Small grains

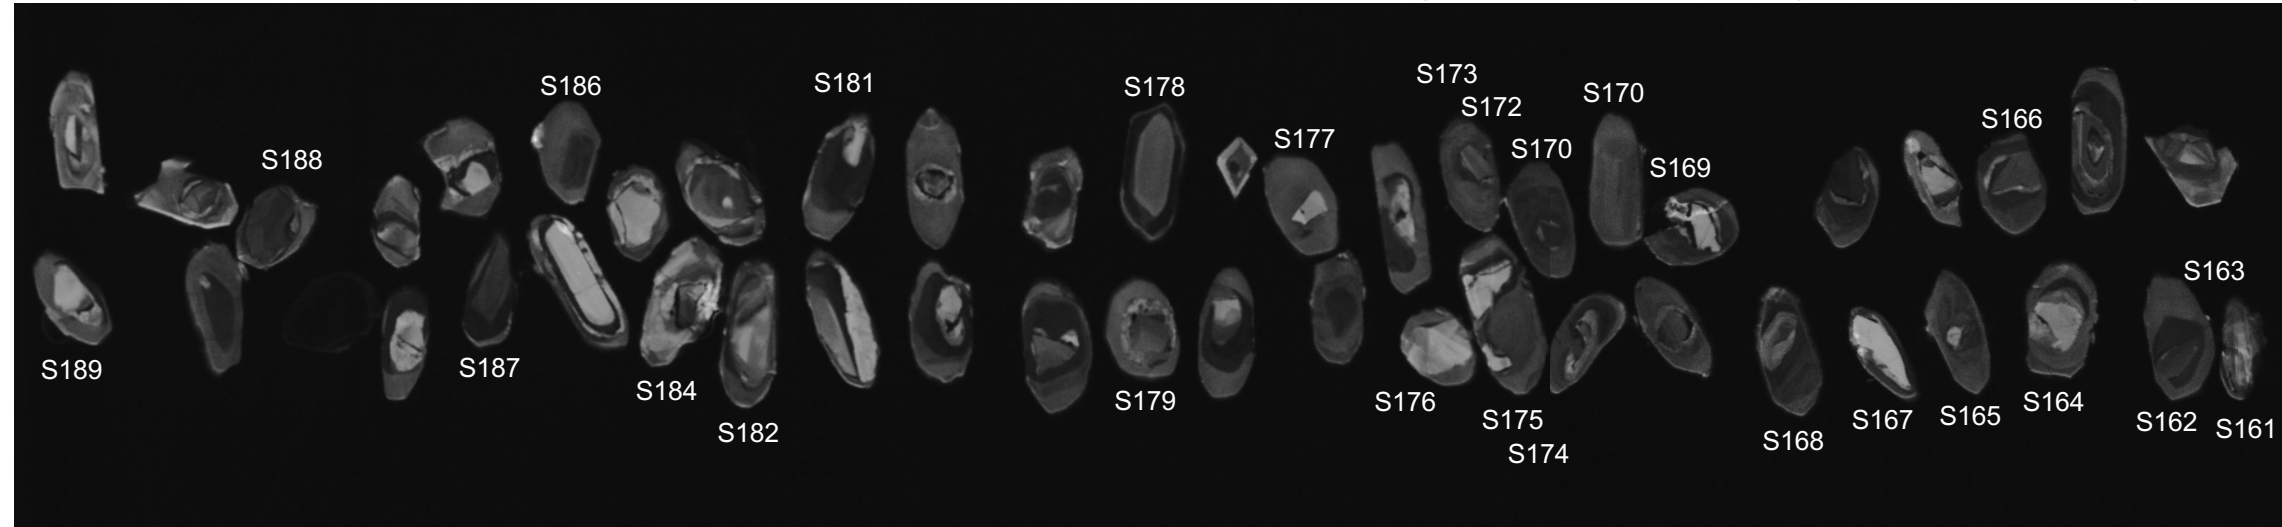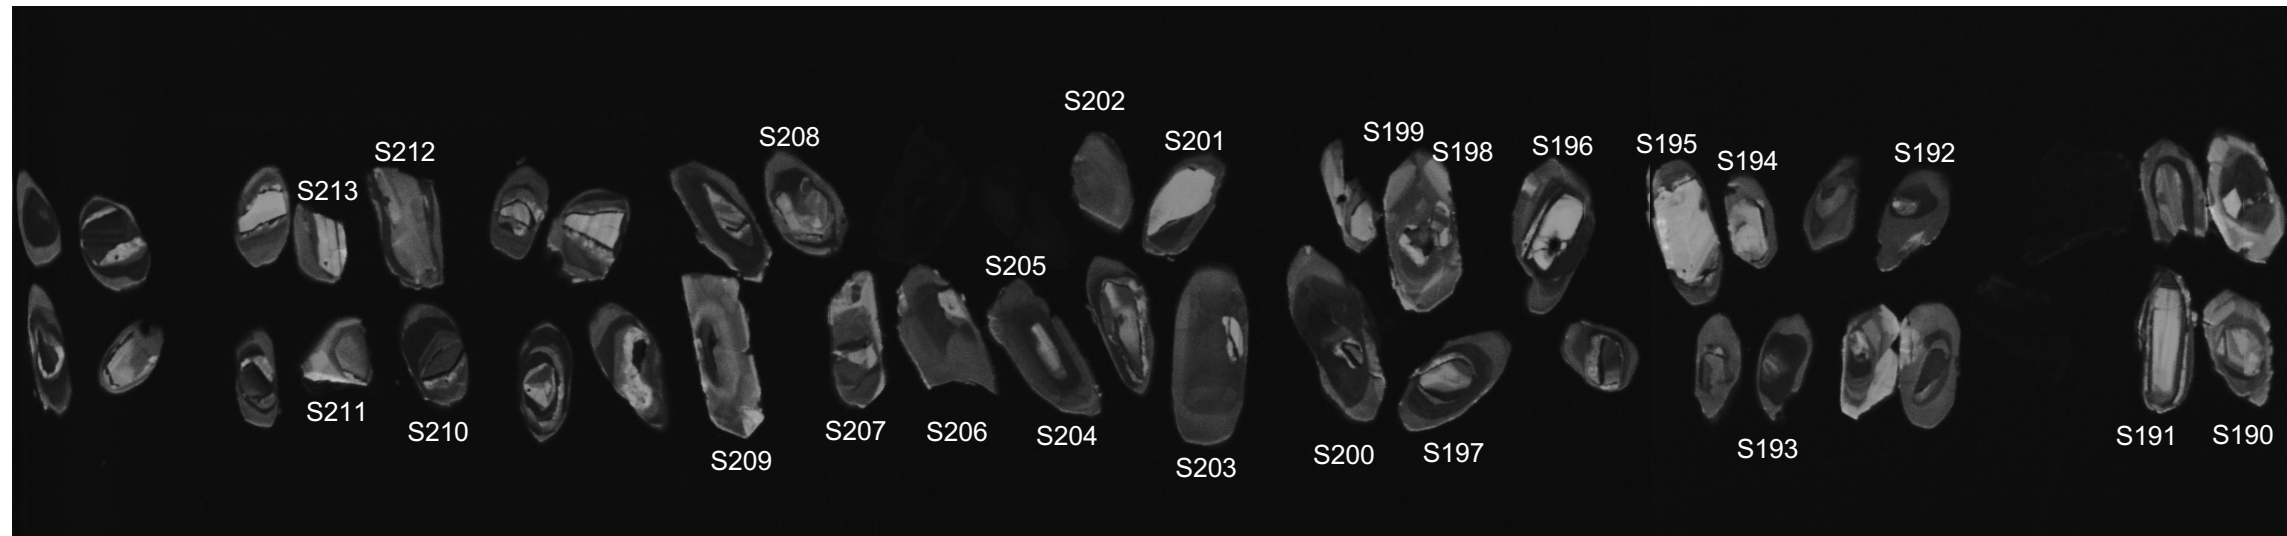

## CP1803 Mischief mélange at Litte Codroy Pond, Small grains

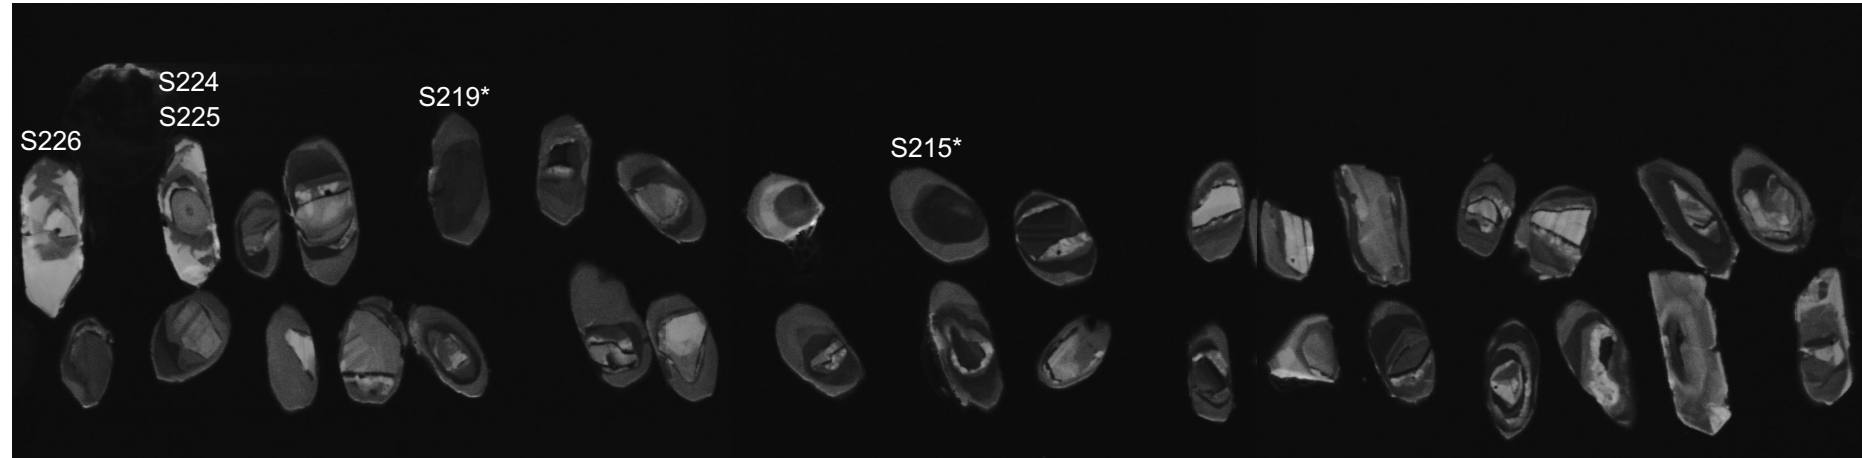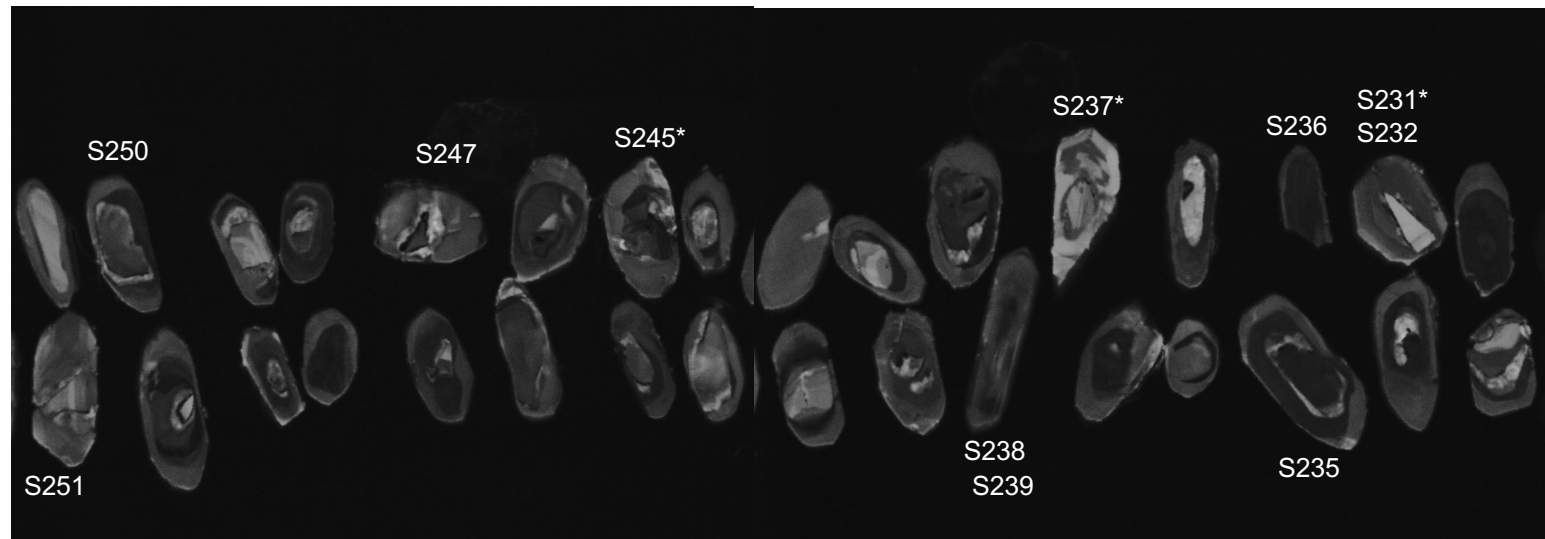

# CP1803 Mischief mélange at Litte Codroy Pond, Small grains

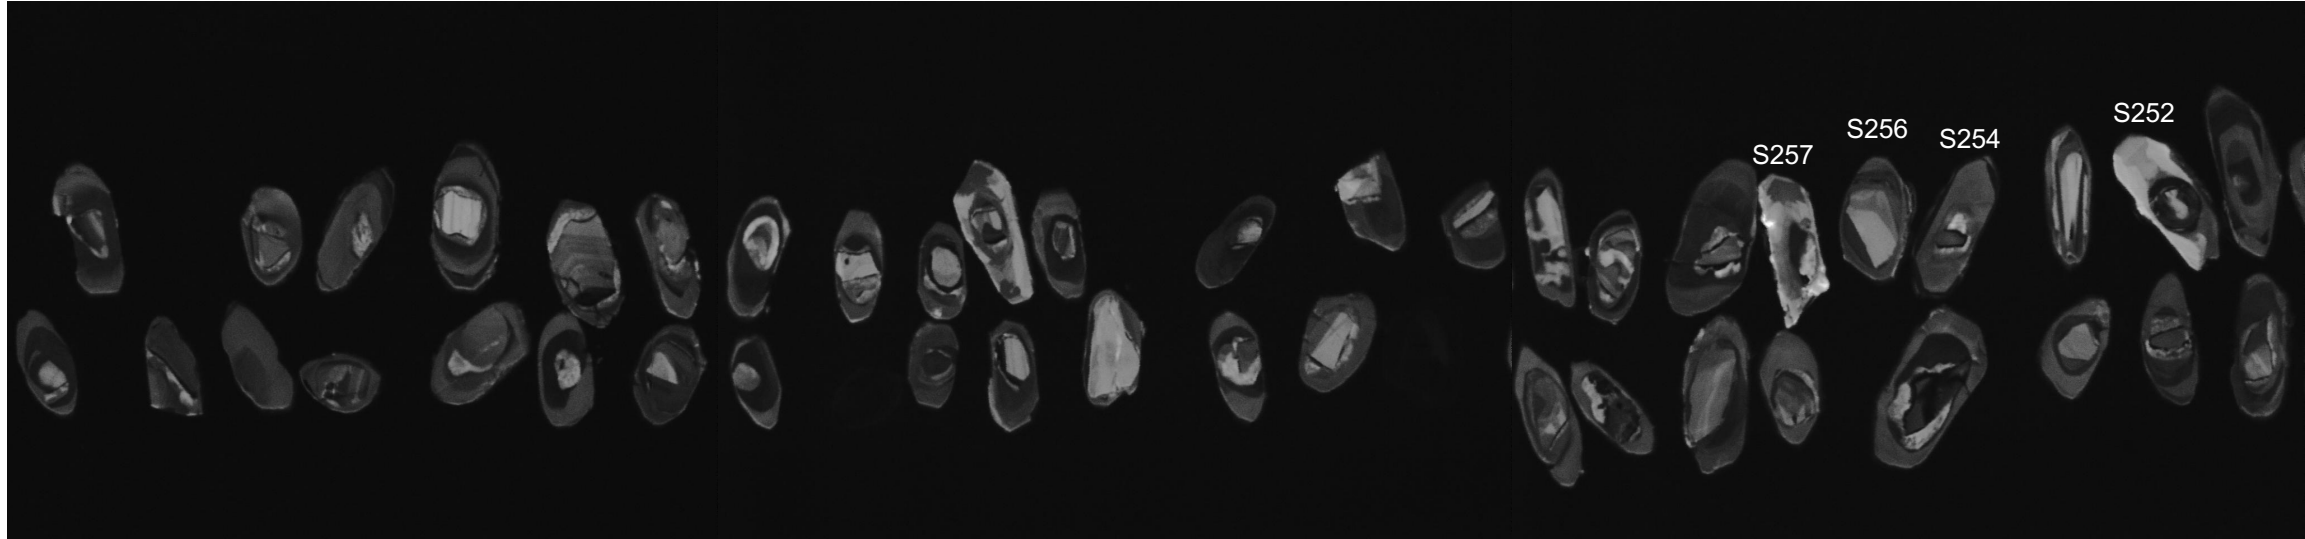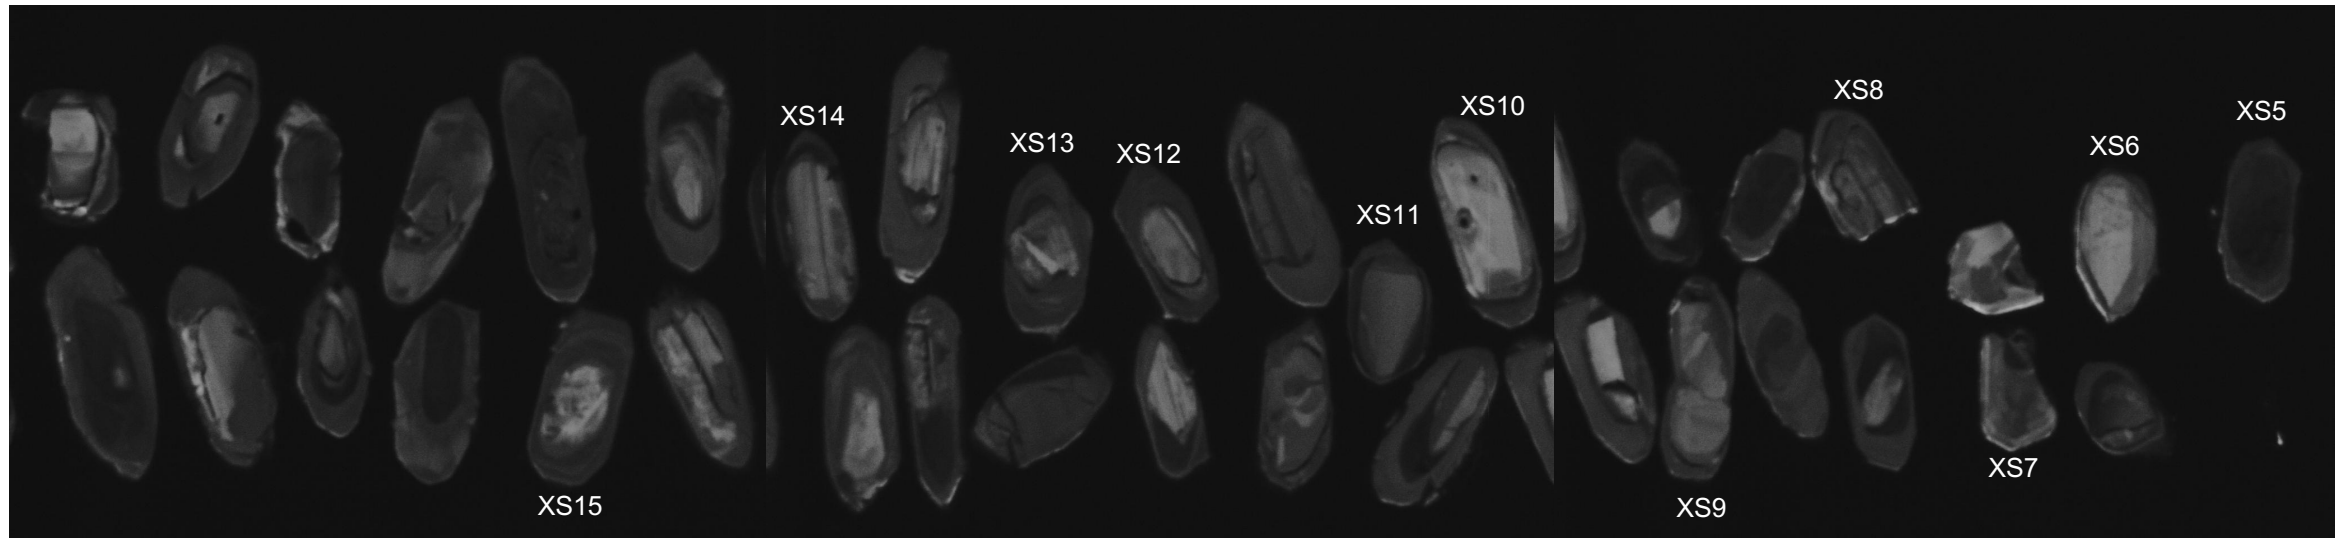

# CP1803 Mischief mélange at Litte Codroy Pond, Extra Small grains

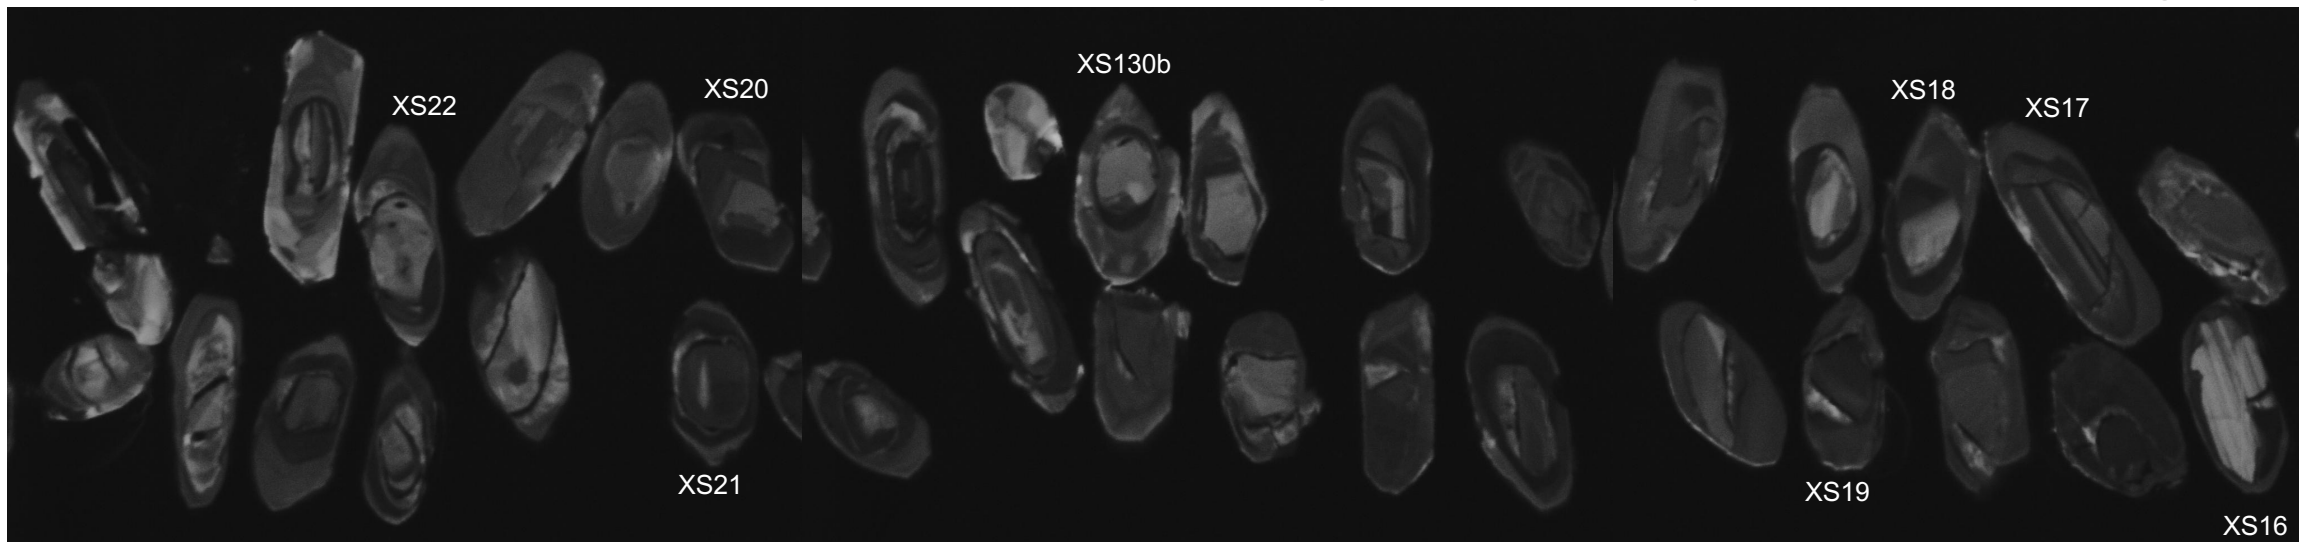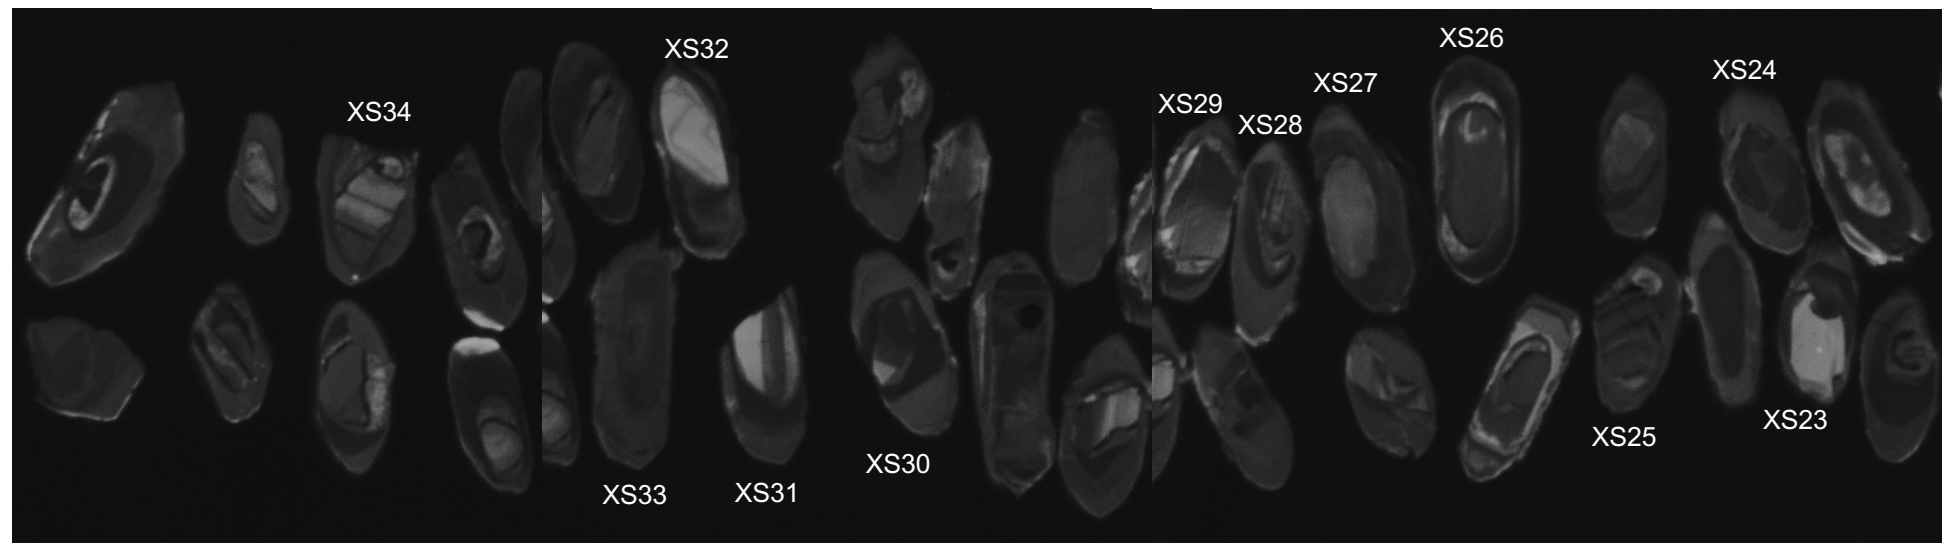

**B1728 Tonalite at Cormacks Lake, Large grains**

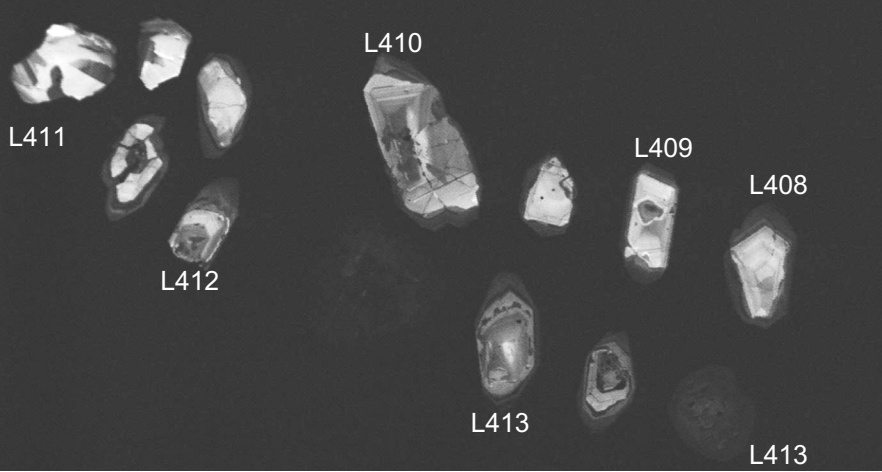

**B1728 Tonalite at Cormacks Lake, Medium grains**

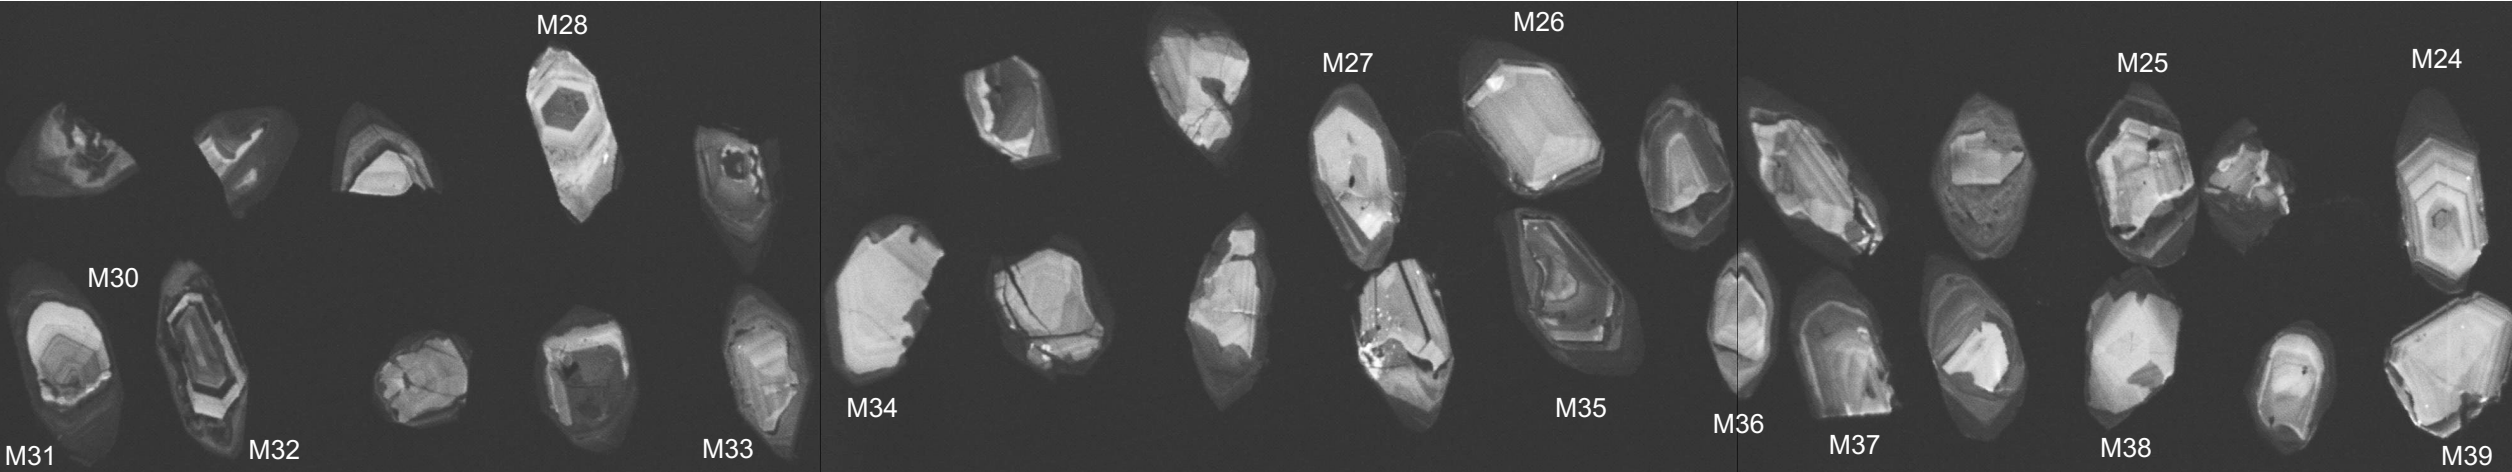

## B1728 Tonalite at Cormacks Lake, Medium grains

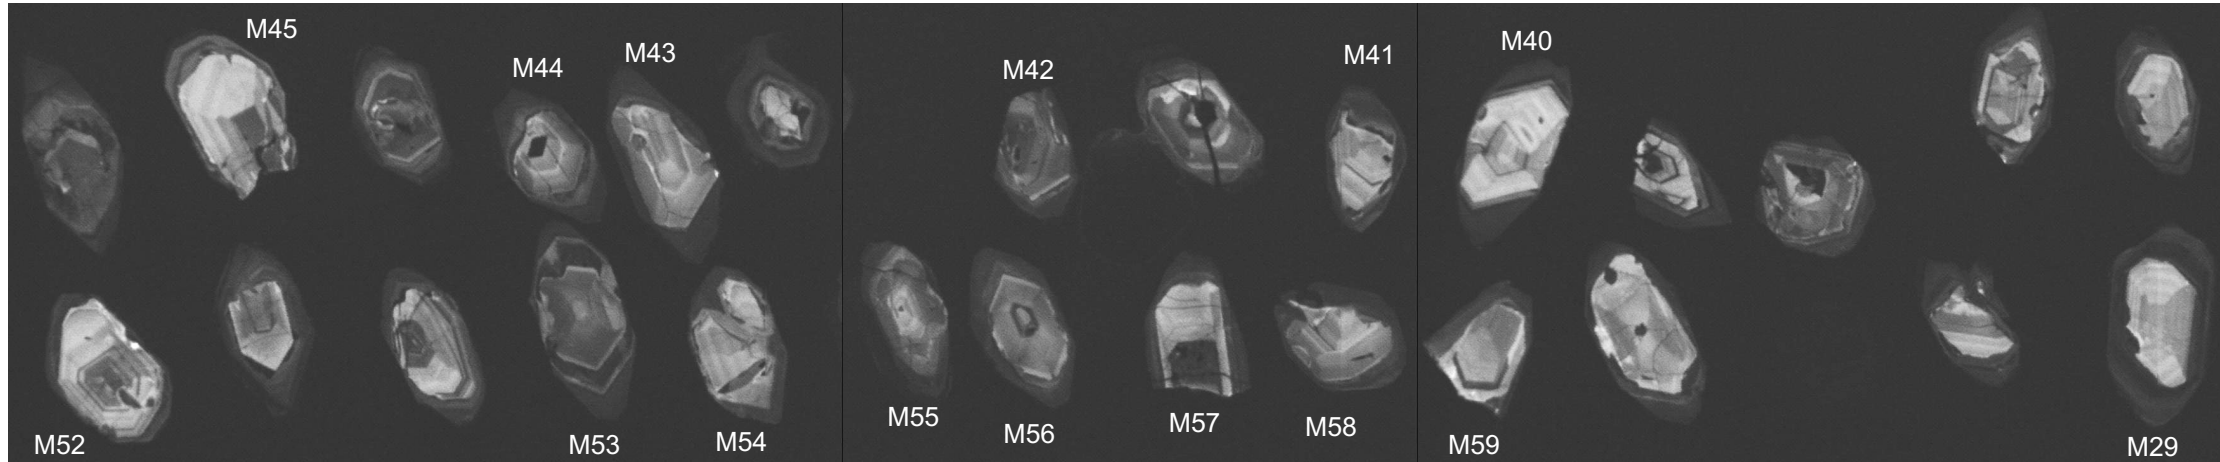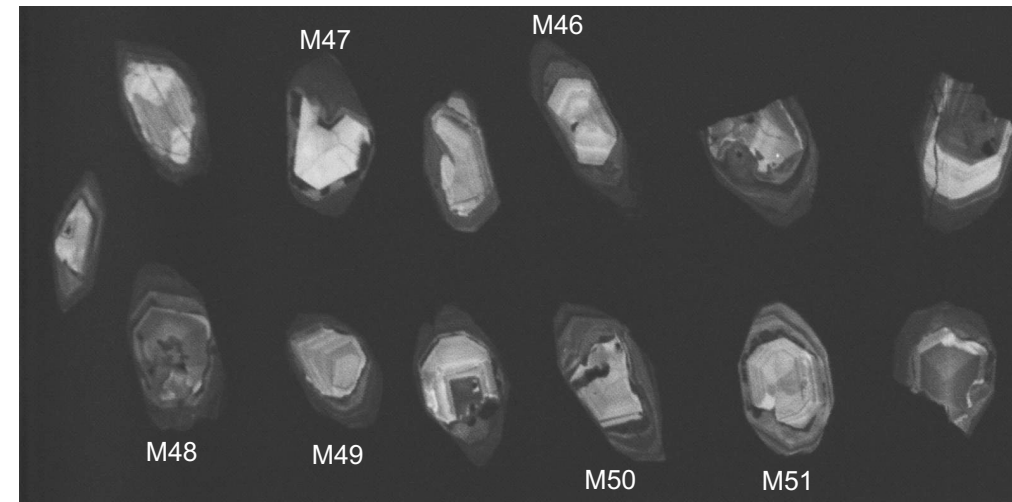

## B1728 Tonalite at Cormacks Lake, Small grains

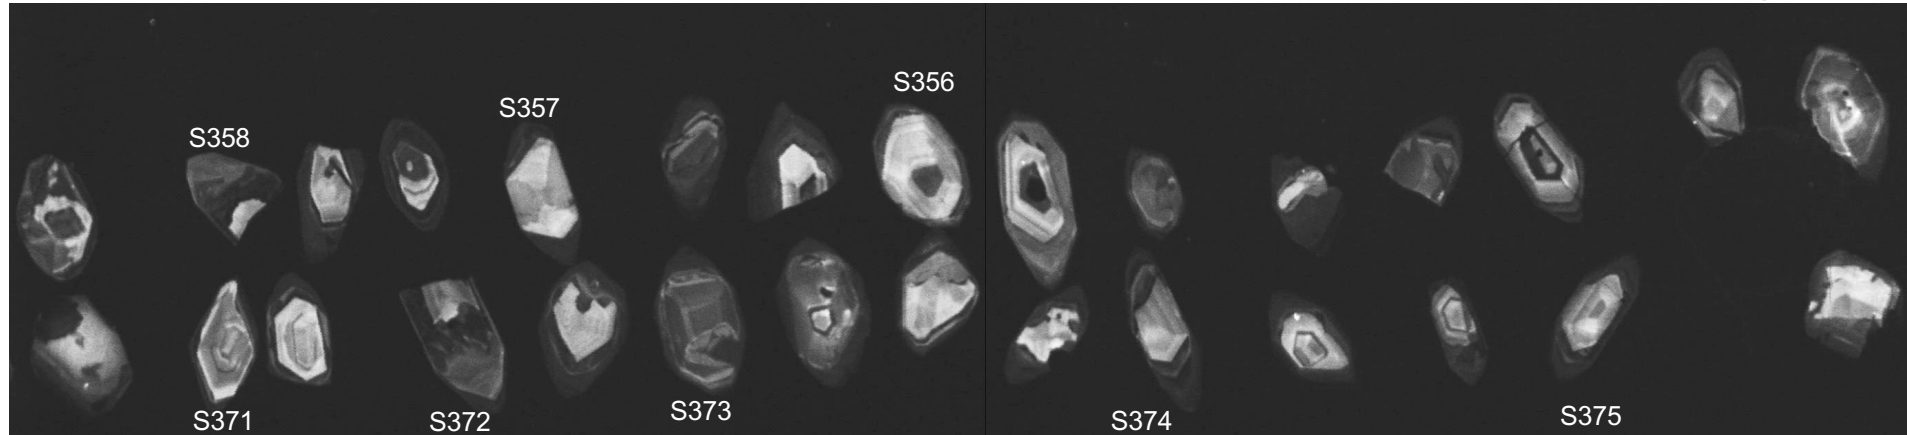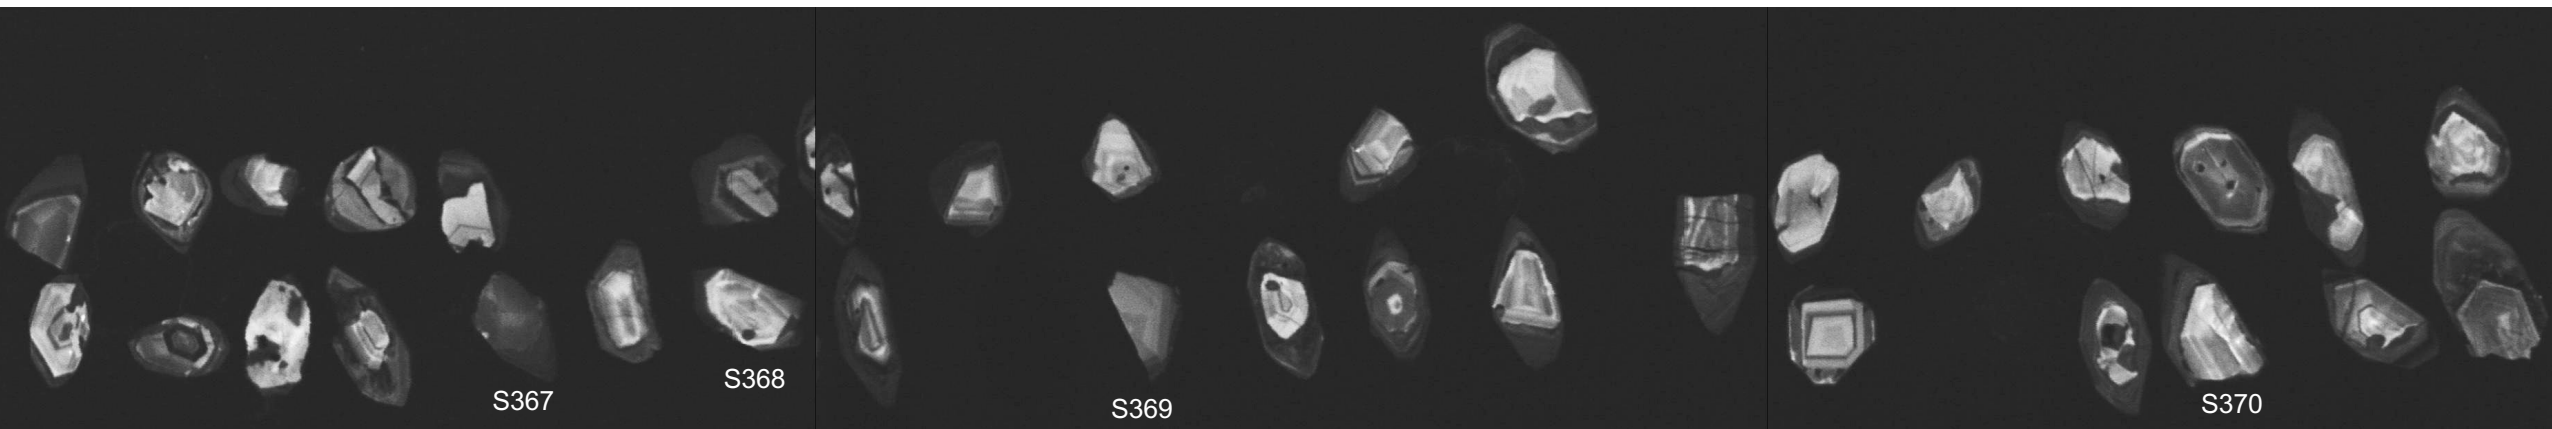



## B1728 Tonalite at Cormacks Lake, Small grains

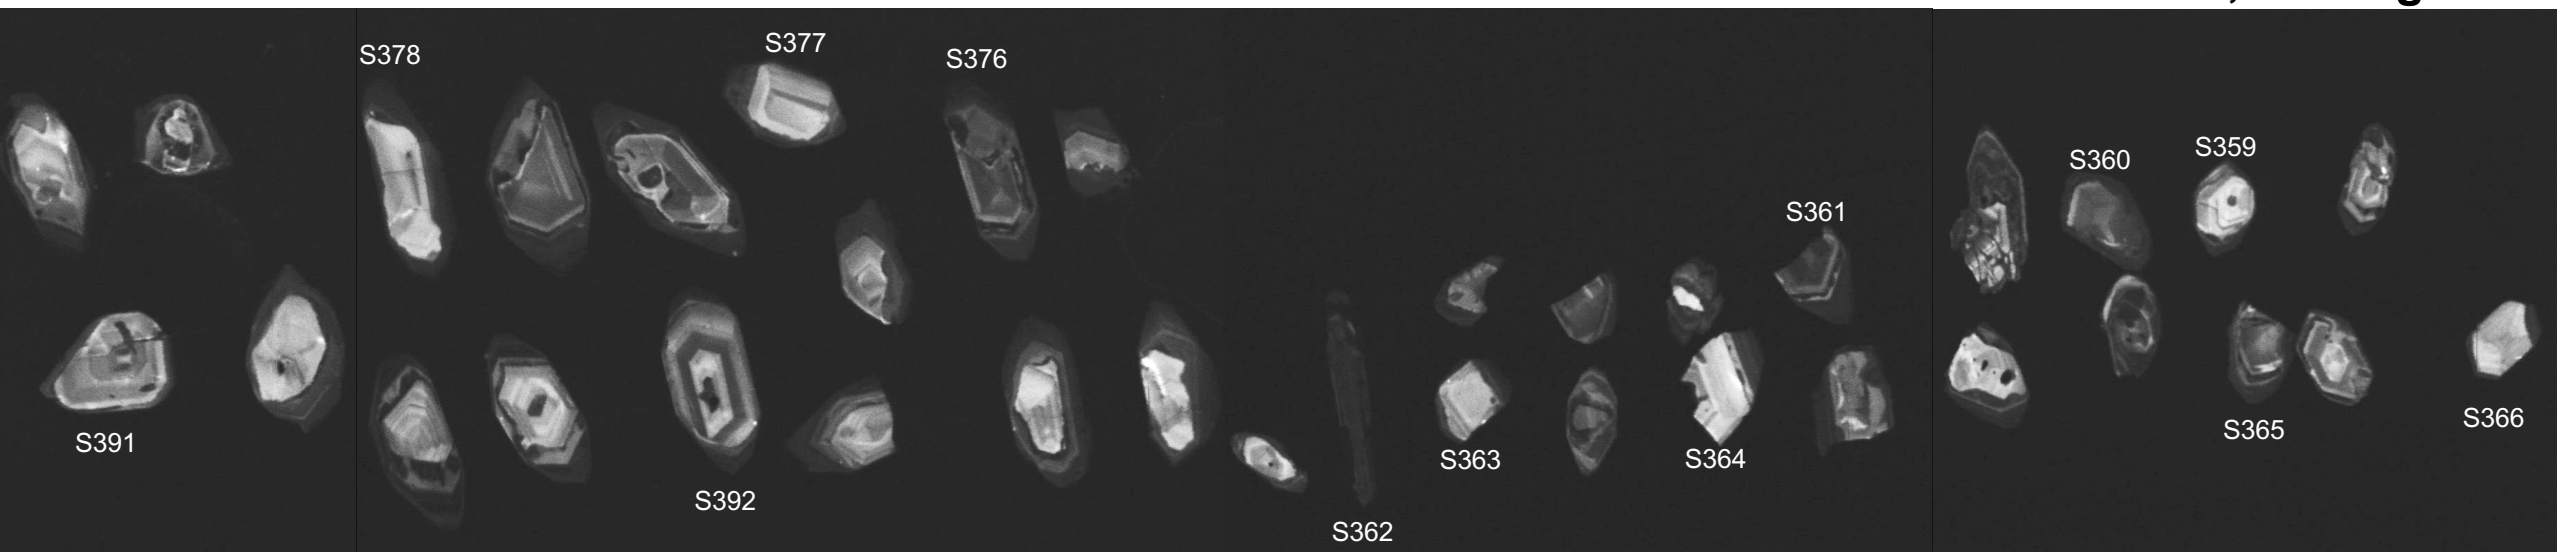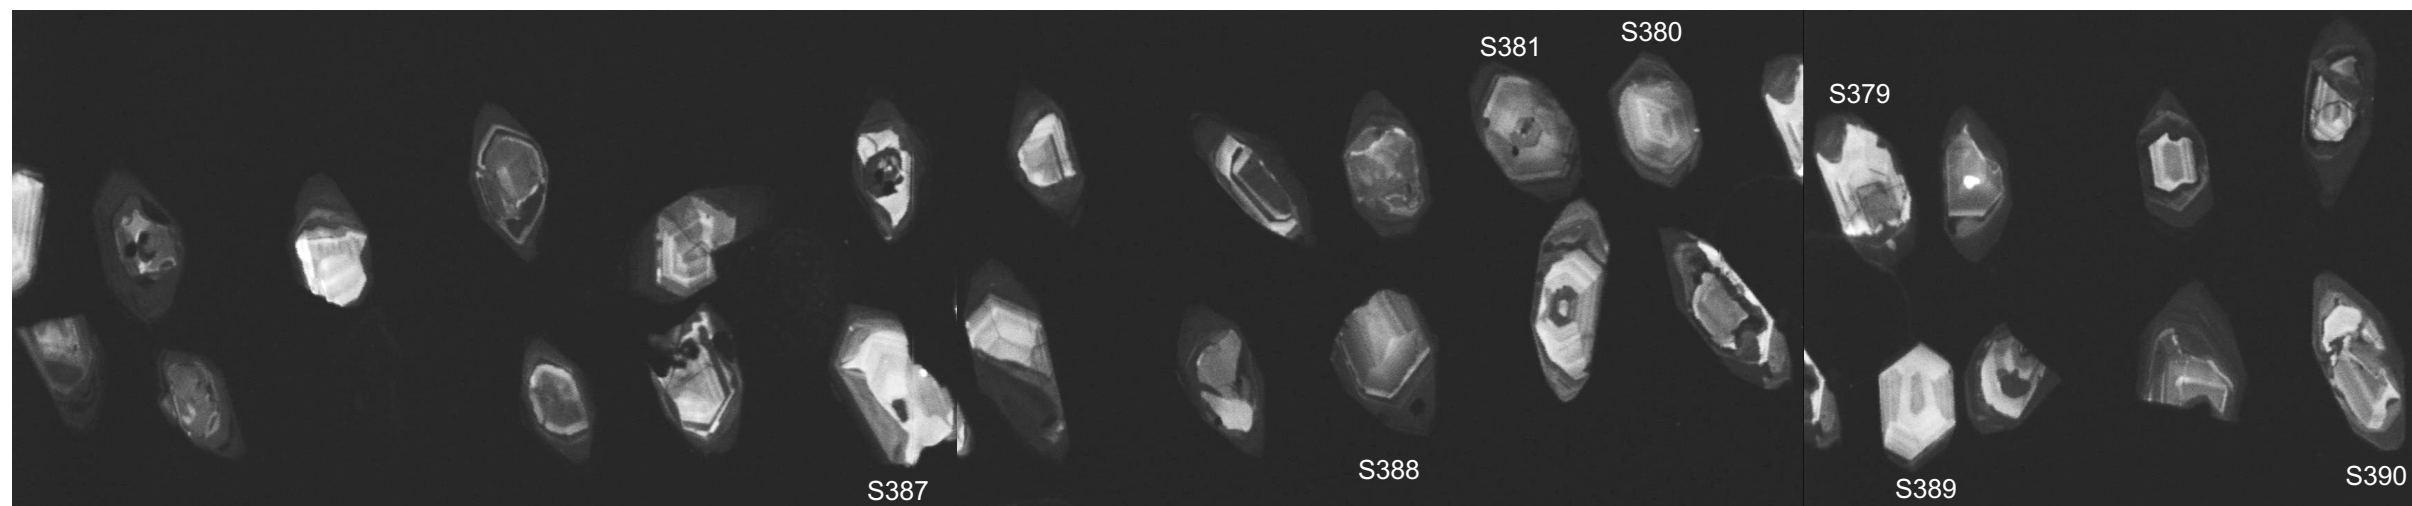

**B1728 Tonalite at Cormacks Lake, Small grains**

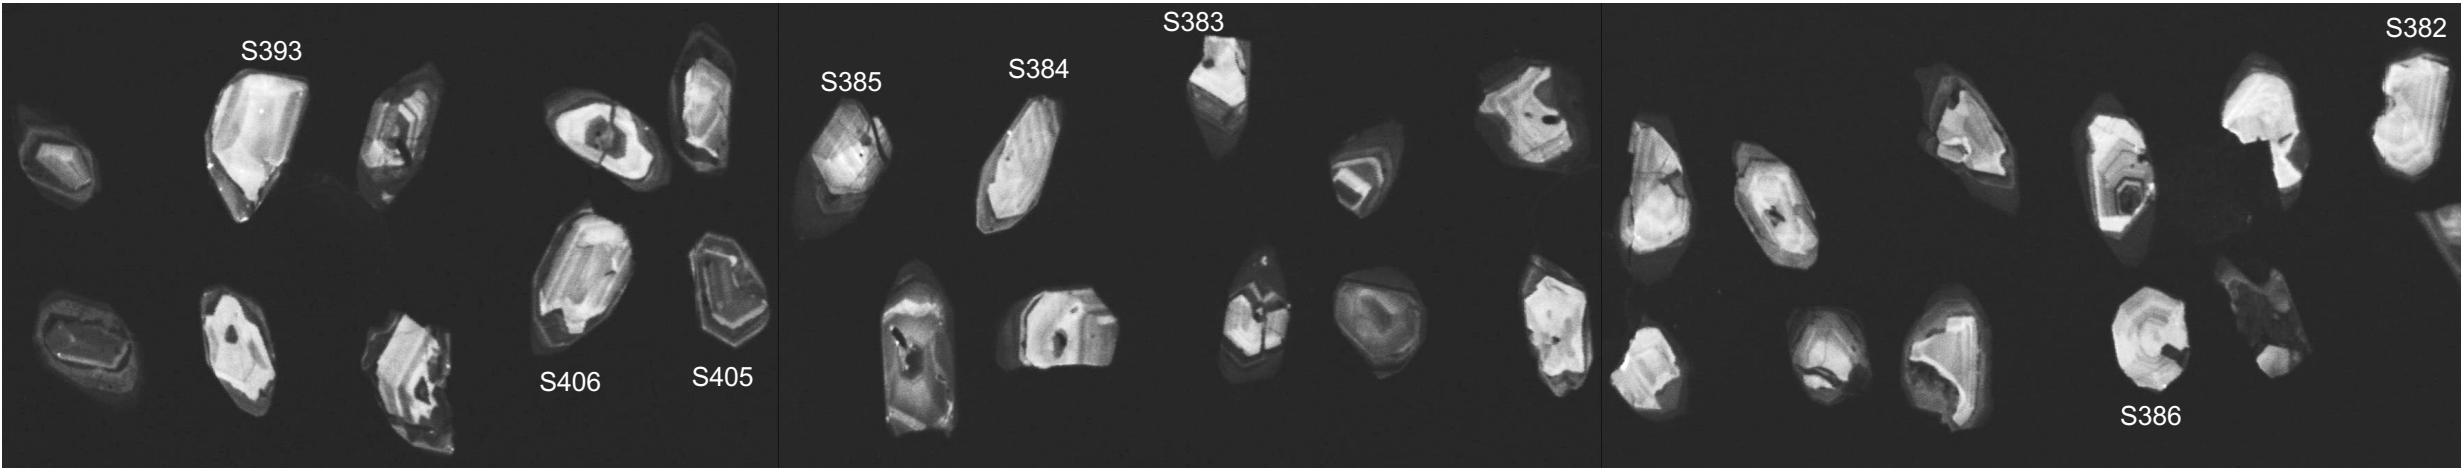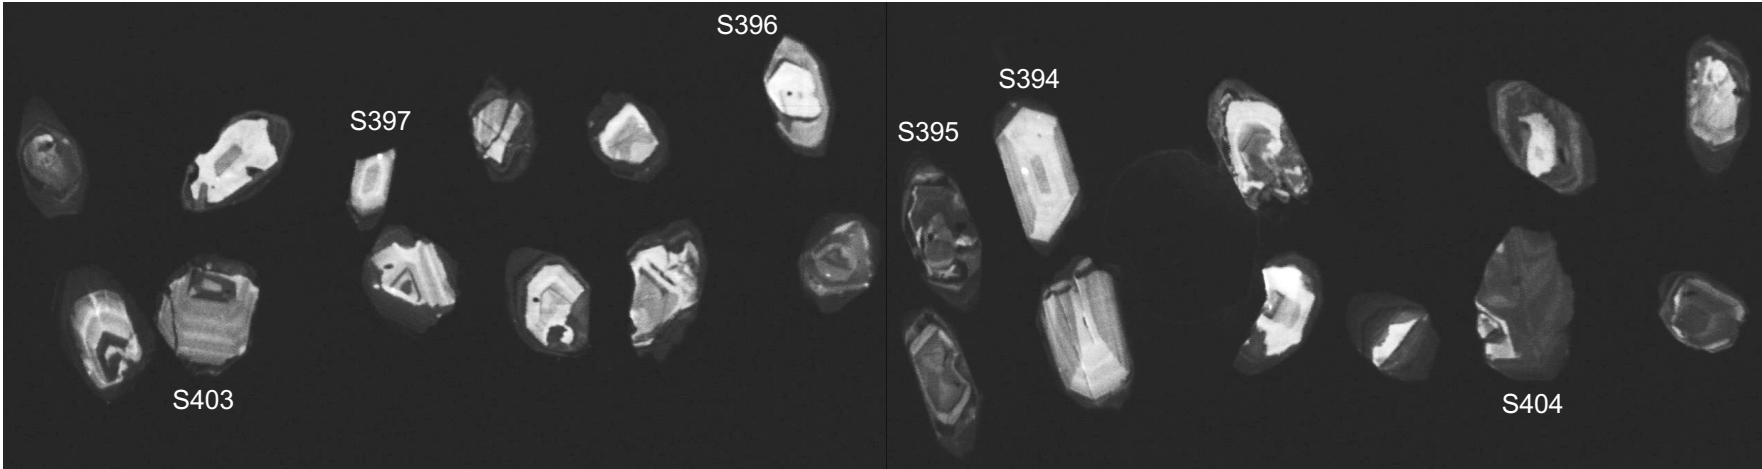

## B1728 Tonalite at Cormacks Lake, Small grains

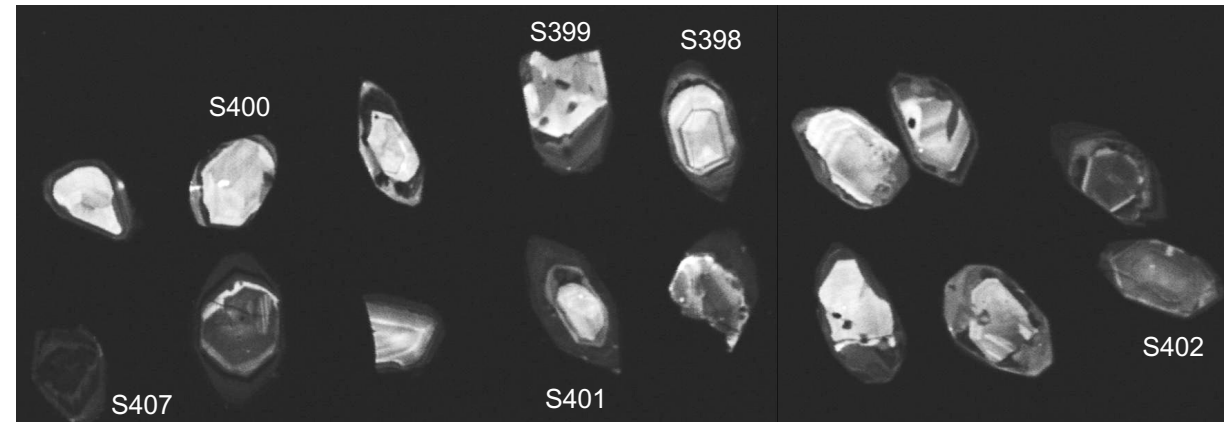

## B1725 granite near Bill Shears Pond Extra Large grains

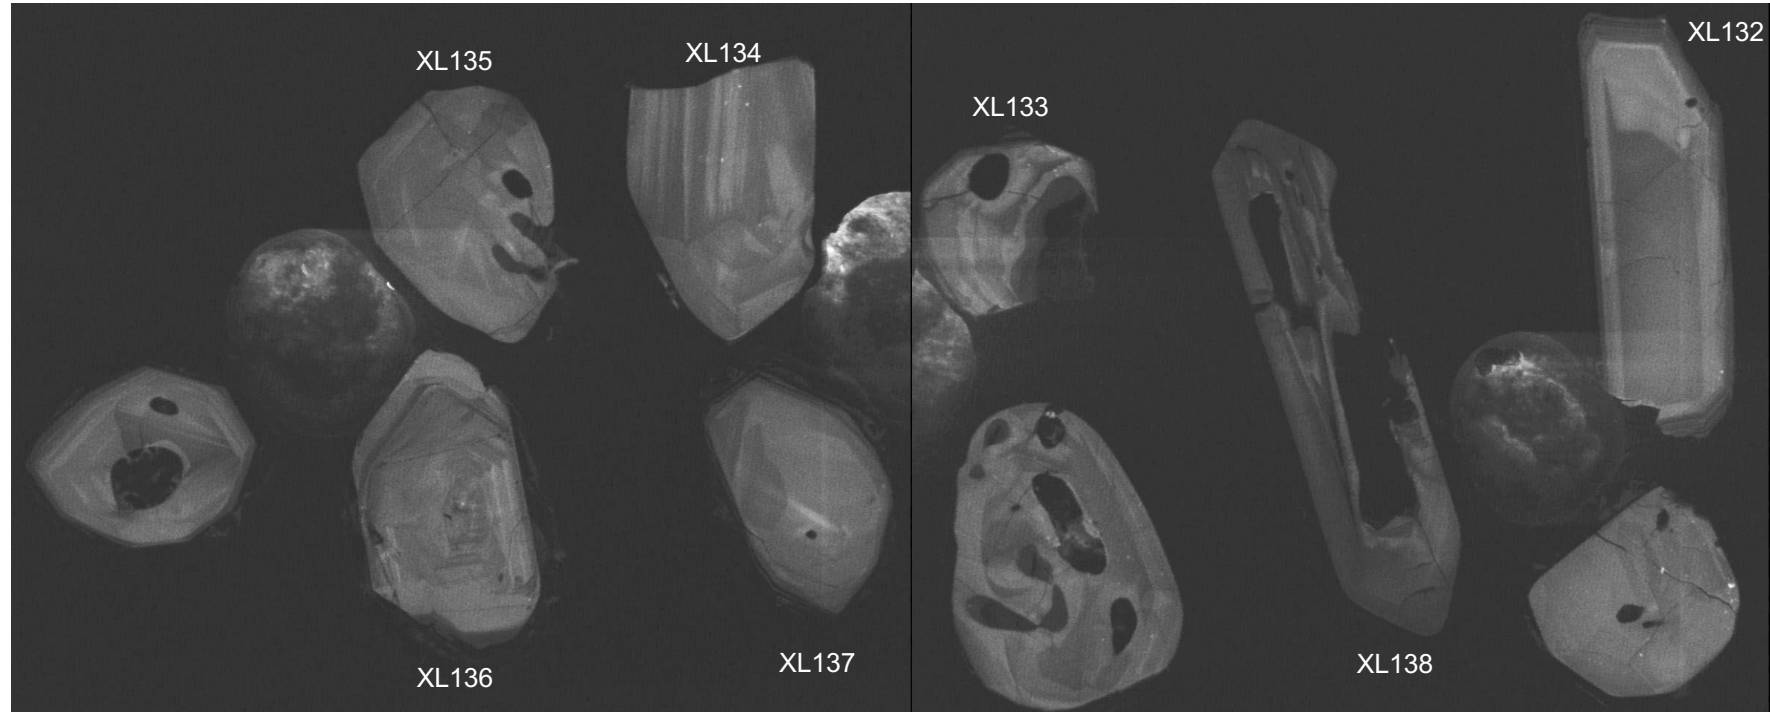

# B1725 granite near Bill Shears Pond Medium grains

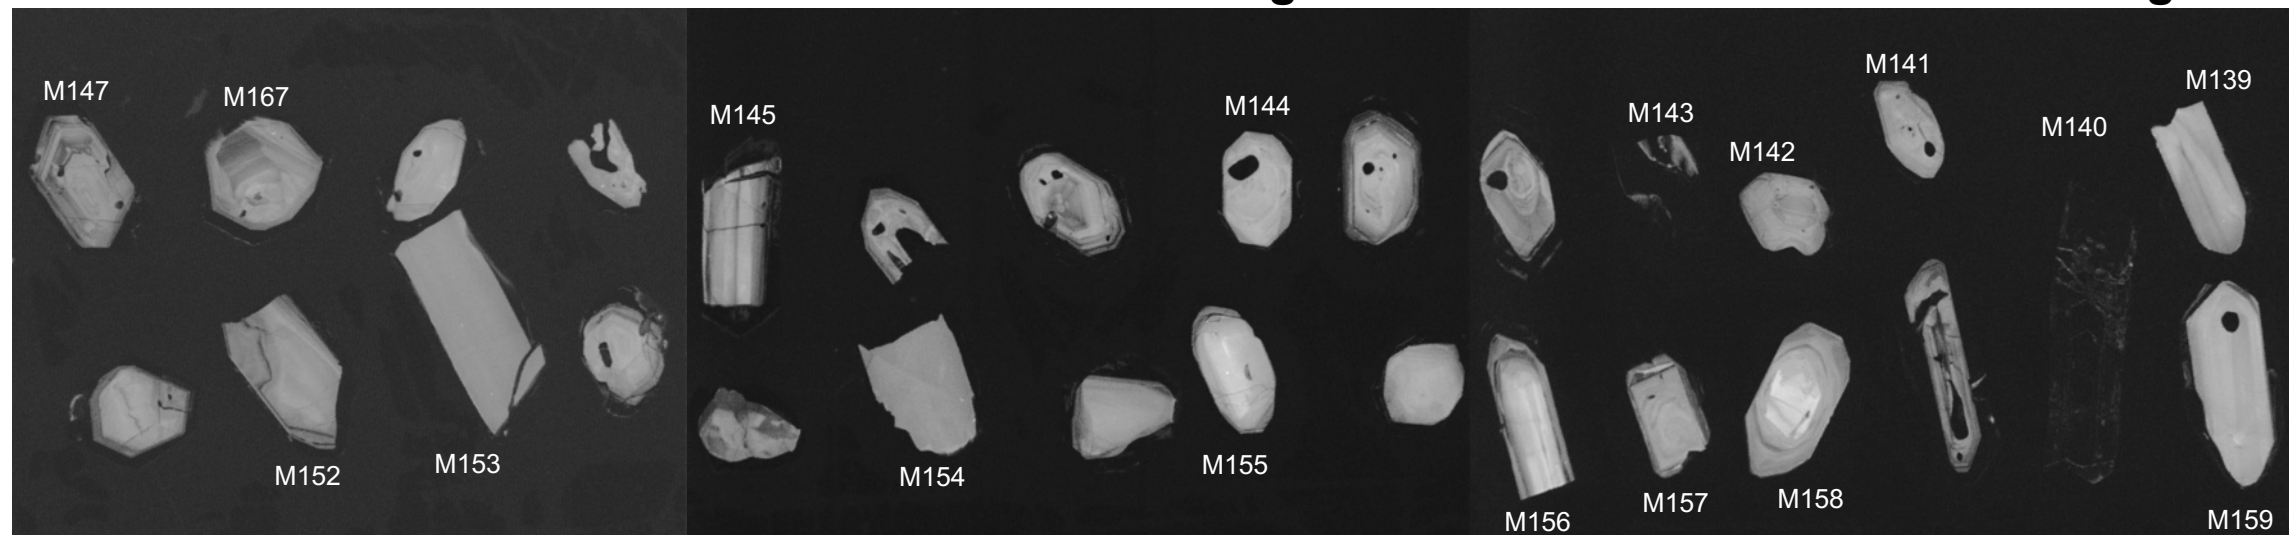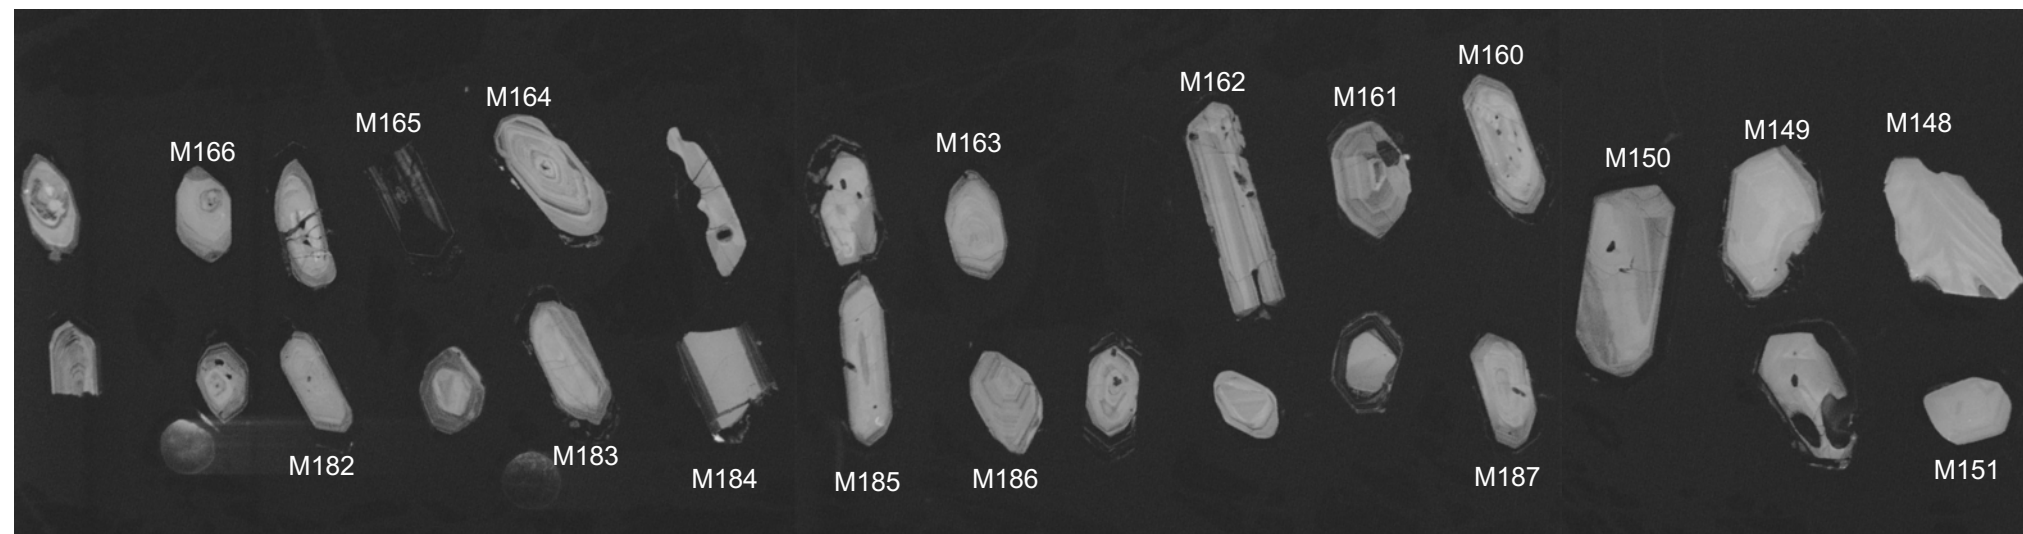

## B1725 granite near Bill Shears Pond Medium grains

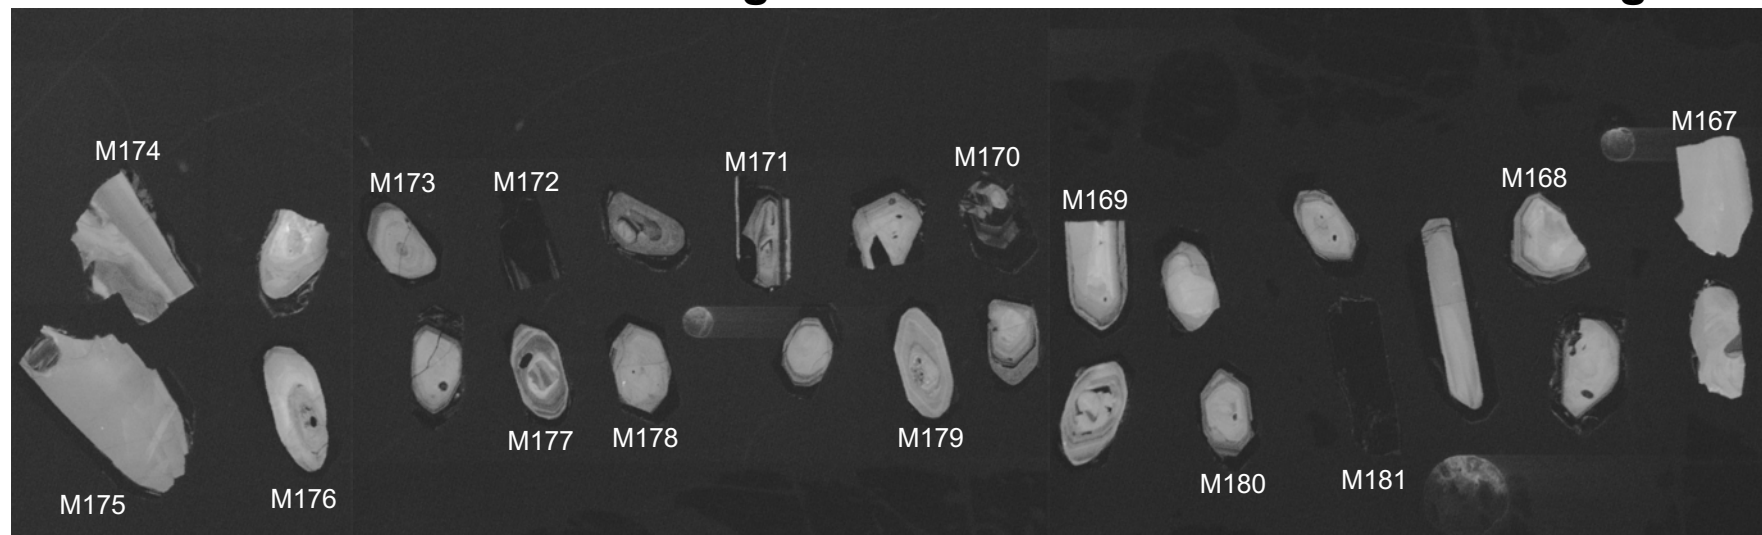

# B1725 granite near Bill Shears Pond Small grains

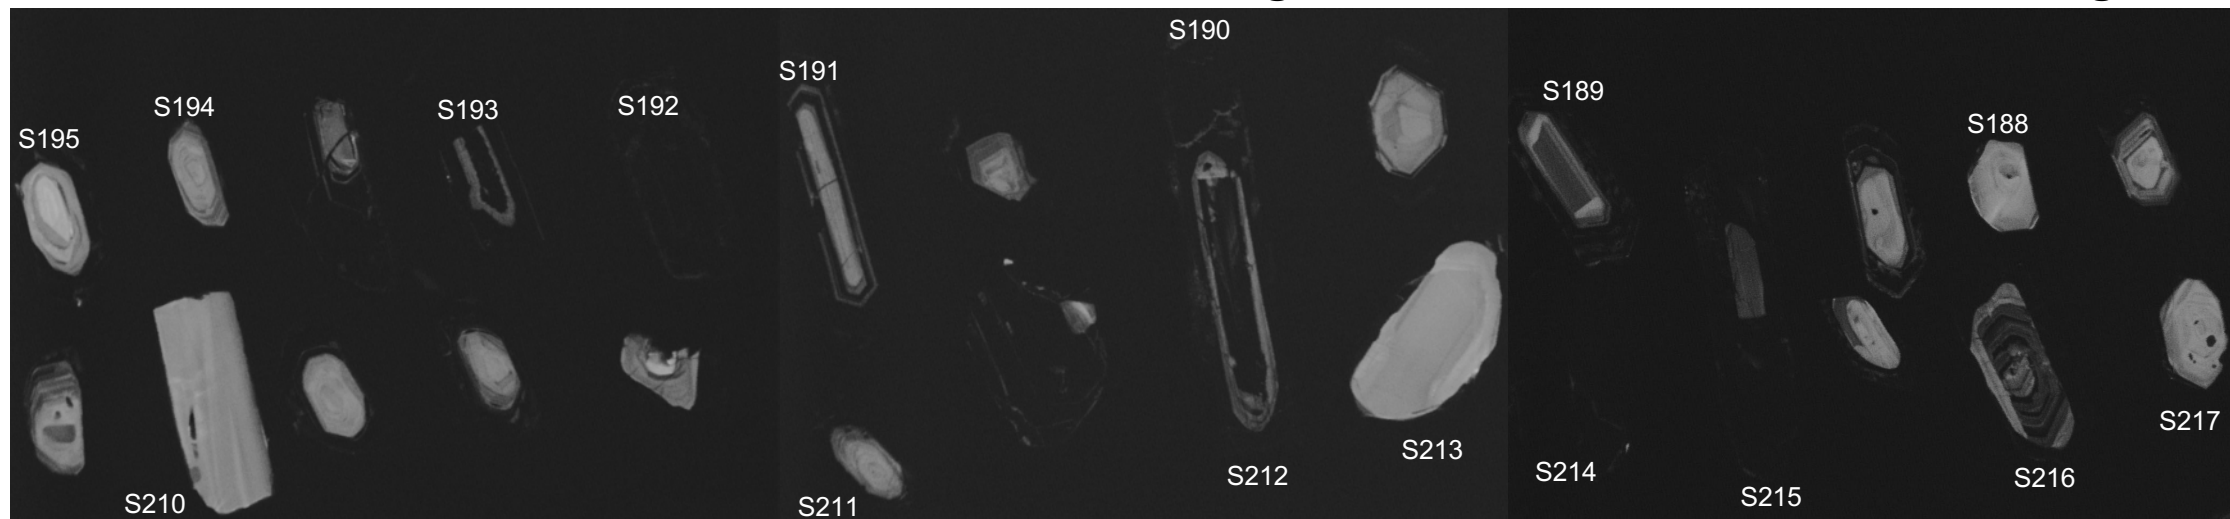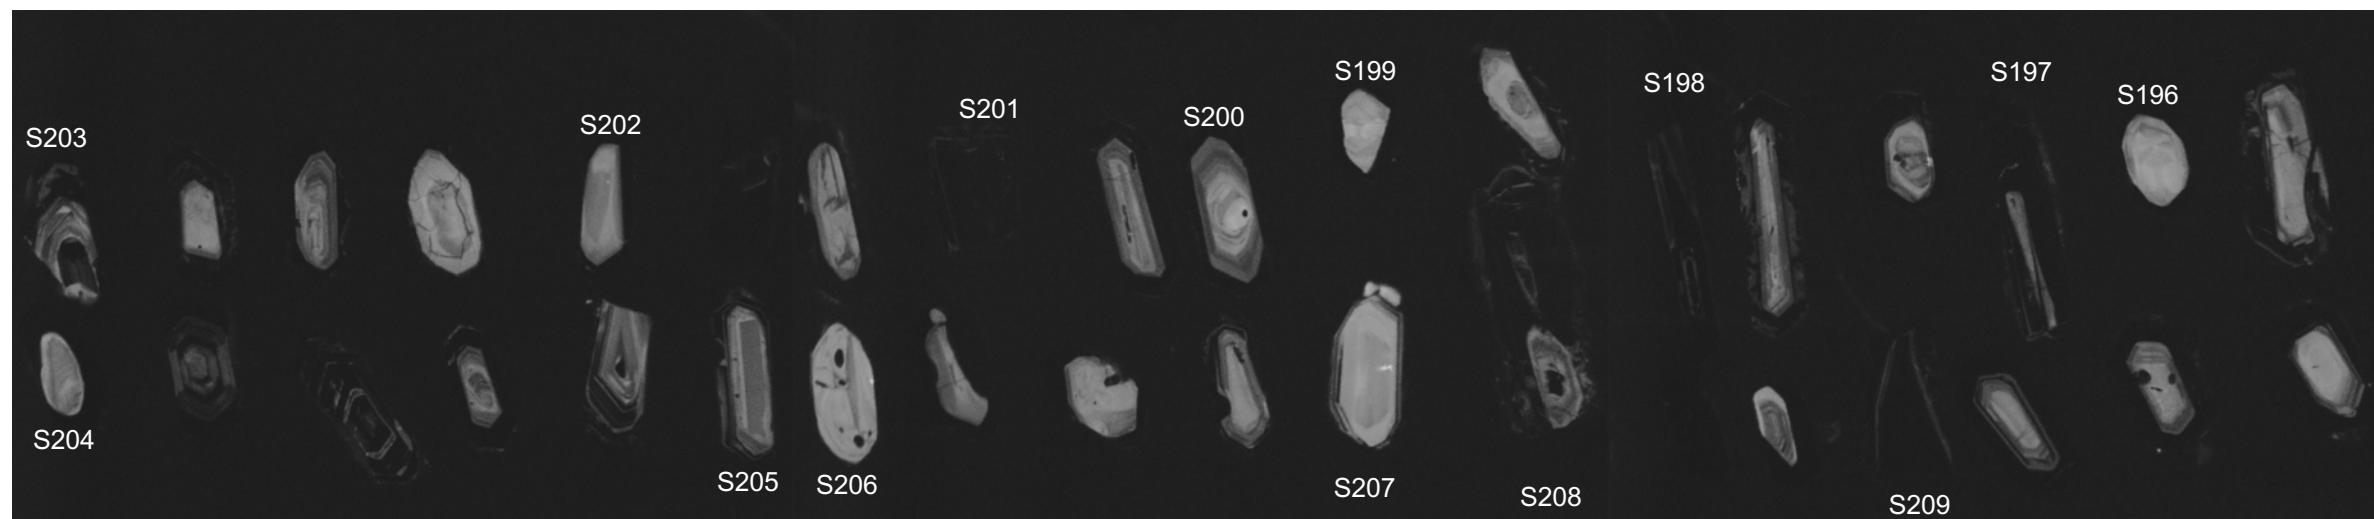



B1725 granite near Bill Shears Pond Small grains

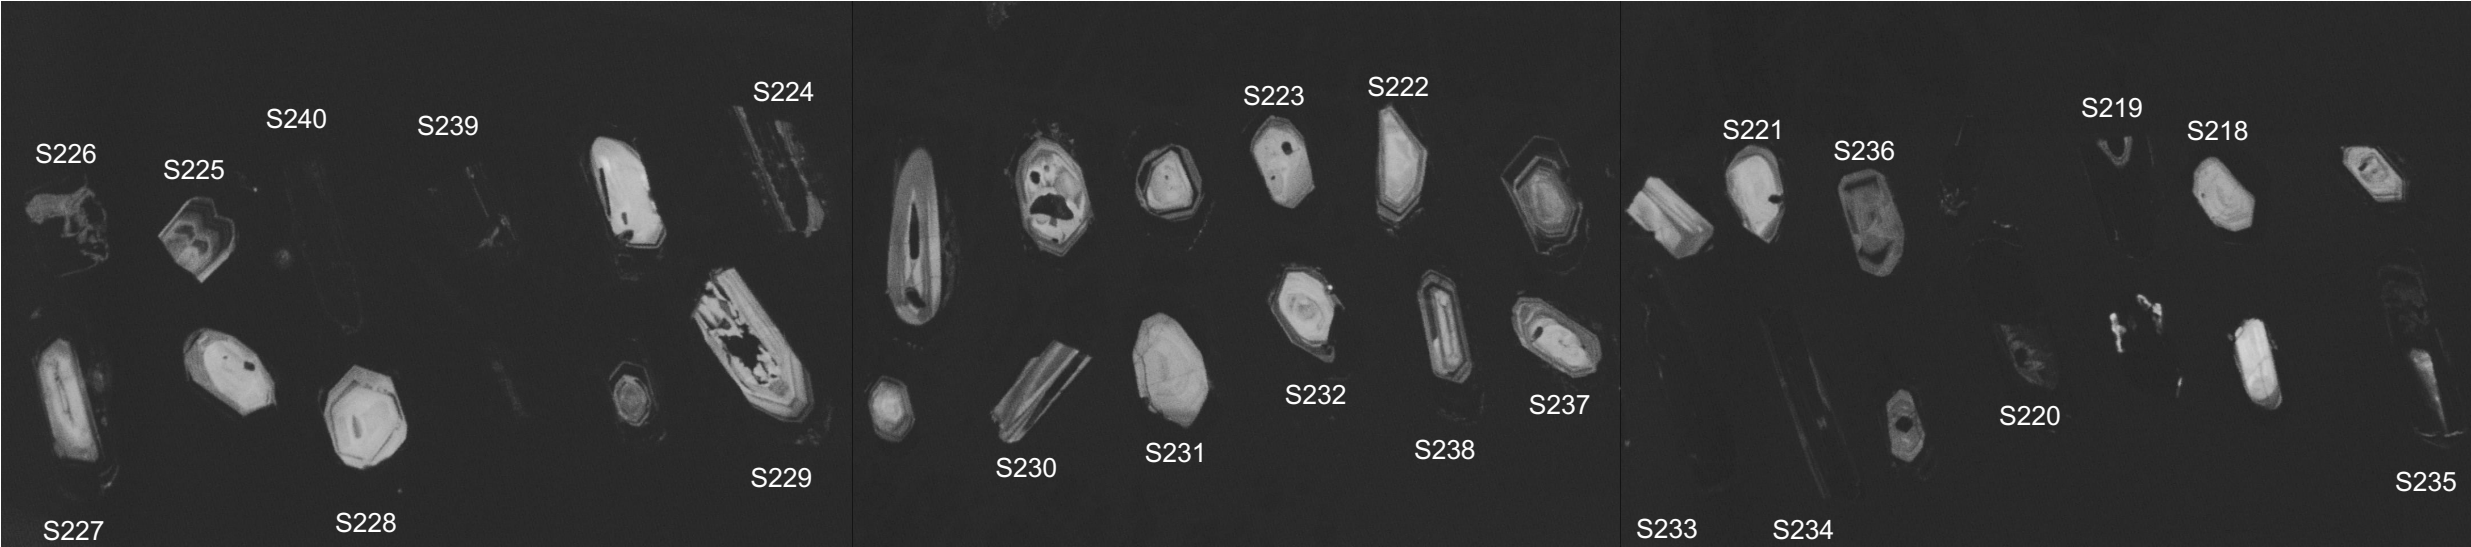



## CP1802 pink granite at Little Codroy Pond, Medium grains

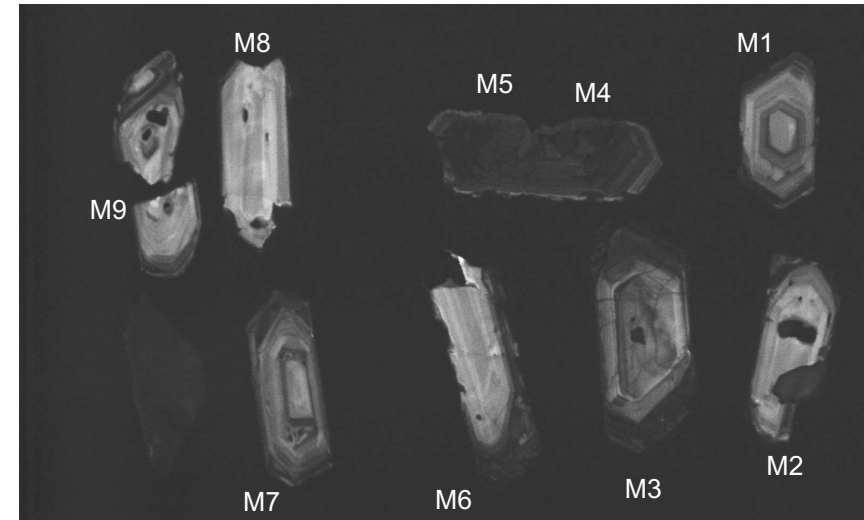

## CP1802 pink granite at Little Codroy Pond, Small grains

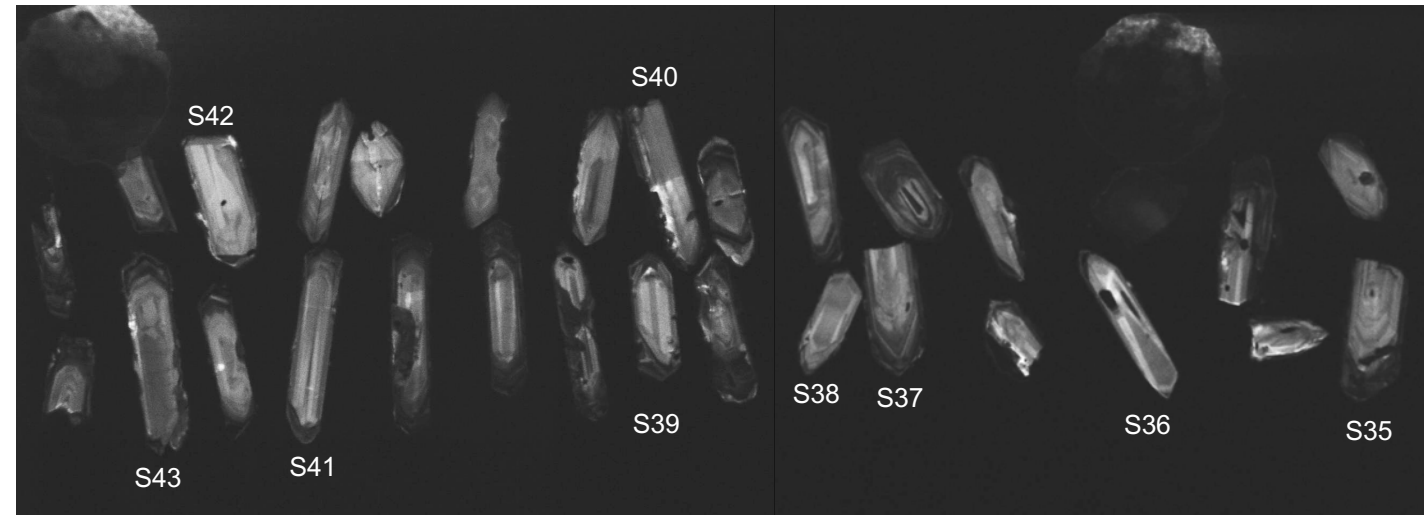

## CP1802 pink granite at Little Codroy Pond, Small grains

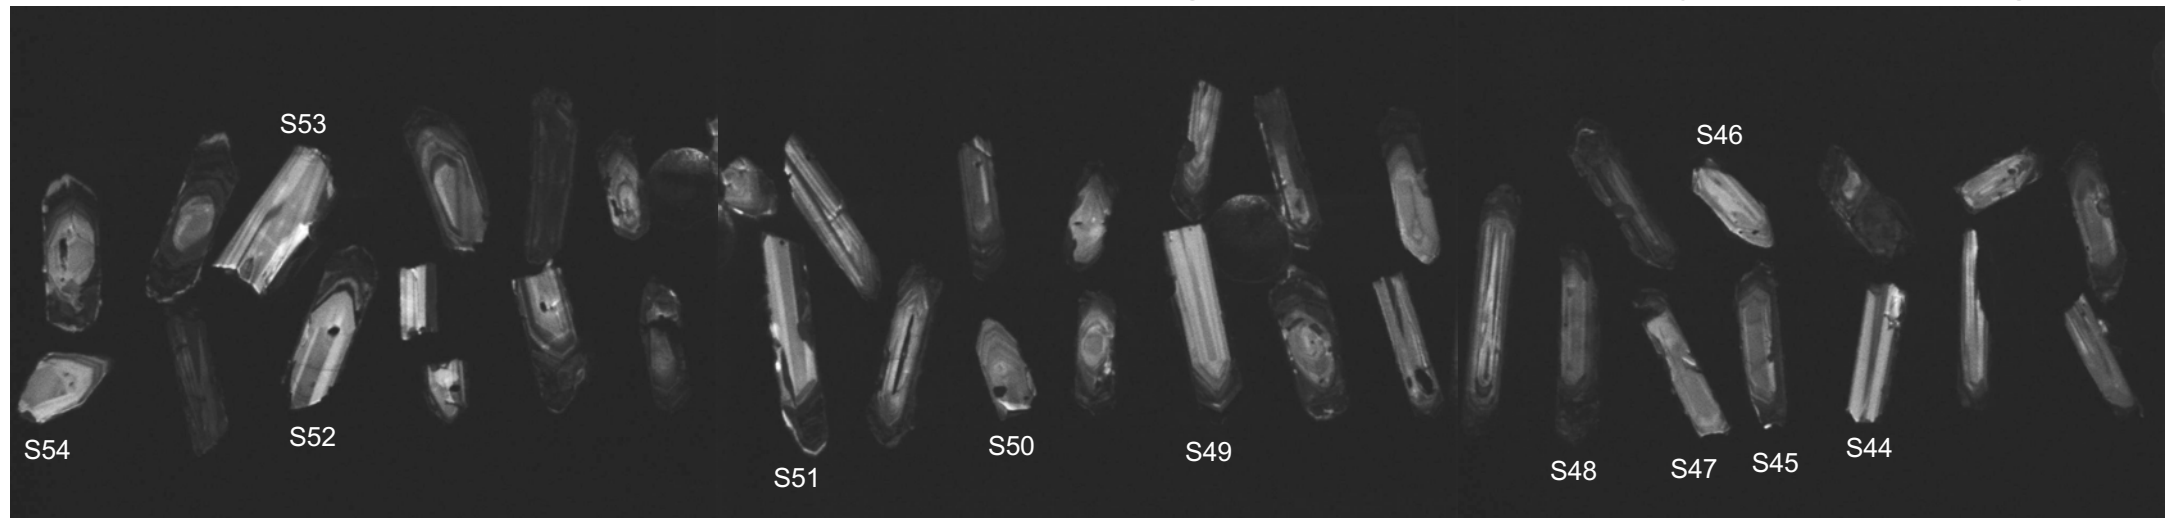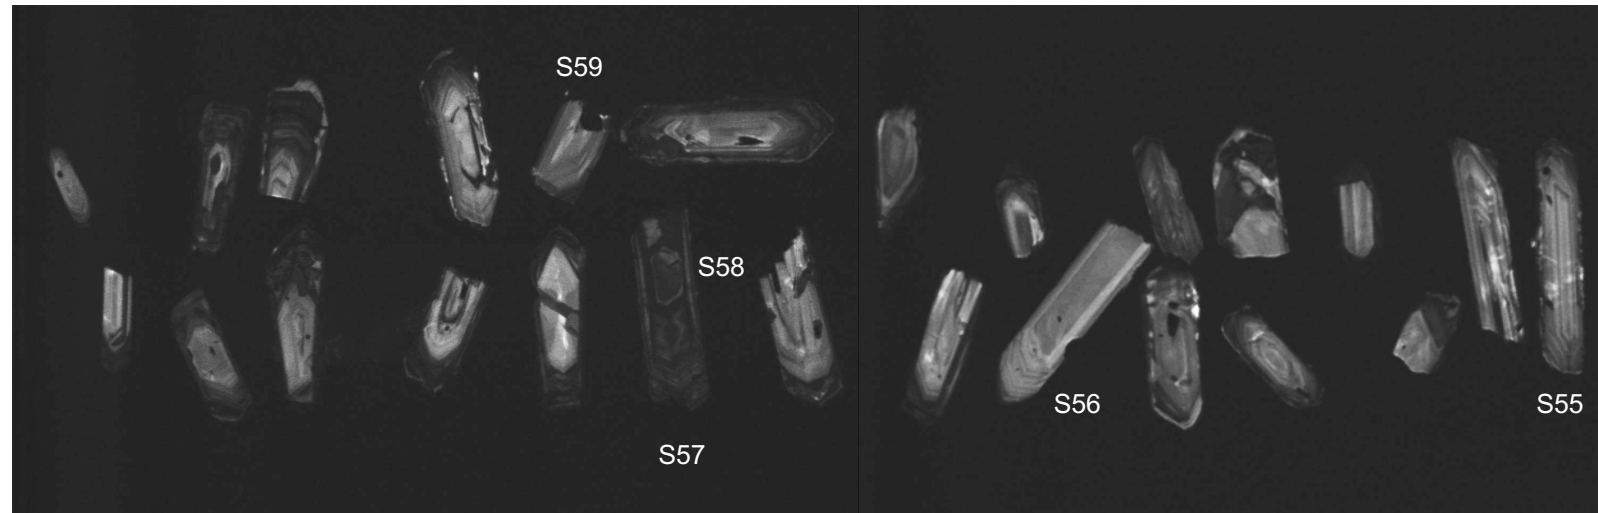

Supplement: Supplementary file 5 [file 1]
