# Supplementary material
Source: publisher figshare collection journal article supplement (https://gsapubs.figshare.com/articles/dataset/_/18730850)
Supplement: Supplementary file 1 [file 2]

## Sheet: Table S1
Table S1. LA-ICPMS Isotopic U-Pb and trace element data.
									Corrected isotope ratios															Dates (Ma)									7/6-6/8	7/5-6/8	207-corrected		208-corrected			Concentrations (ppm)
		Notes (CL/TIMS)	U	Th	Pb*		206Pb		208Pb*	±2s	206Pb*	±2s	207Pb*	±2s	206Pb*	±2s	error	238U	±2s	207Pb*	±2s	error		208Pb*	±2s	207Pb*	±2s	207Pb*	±2s	206Pb*	±2s		%	%	206Pb*	±2s	206Pb*	±2s
Analysis			ppm	ppm	ppm	Th/U	204Pb		232Th	(%)	207Pb*	(%)	235U*	(%)	238U	(%)	corr.	206Pb*	(%)	206Pb*	(%)	corr.		232Th	(Ma)	206Pb*	(Ma)	235U	(Ma)	238U*	(Ma)		disc.	Disc	238U*	(Ma)	238U*	(Ma)		P	Ti	Y	Zr	Nb	La	Ce	Pr	Nd	Sm
Detrital Zircon Samples
B1557 Paragneiss, Cormack's Lake (48.32200° N, 57.73180° W)
Metamorphic
B1557 S 101 1/5/2016 9:14:58 PM (Run: 1)		m-c	364.42	0.139672	25.346	0.000383271	1014.35		0.0533986	242.653	17.8108	2.39159	0.510444	4.88043	0.0659372	4.25428	0.871702	15.166	4.25428	0.0561457	2.39159	-3.48636e-16		1051.47	2486.19	458.138	53.0463	418.748	16.7468	411.632	16.9646		10.1511	1.69927	0.002	0.00135026	0.00140258	0.000654477		44.1131	0.365708	310.971	545467	0.0790692
B1557 S 102 1/5/2016 9:16:41 PM (Run: 1)		m	3926.22	364.086	365.3	0.0927319	93720.6		0.0274609	4.44488	18.1503	1.33373	0.56255	5.75212	0.0740533	5.59536	0.972748	13.5038	5.59536	0.0550954	1.33373	5.51381e-16		547.559	24.0117	416.121	29.7991	453.185	21.0274	460.529	24.8694		-10.6721	-1.6206	0.002	0.00201195	0.00207177	0.00033675		177.869	1.65619	808.652	512859	0.134785		3.00198	0.00559992	0.212011	0.969043
B1557 S 106 1/5/2016 9:23:35 PM (Run: 1)		m-c	558.473	7.5209	41.9119	0.0134669	3049.1		0.0269699	24.1247	18.4984	2.86672	0.525471	5.52471	0.0704986	4.72275	0.85484	14.1847	4.72275	0.0540589	2.86672	0		537.899	128.055	373.463	64.5333	428.8	19.3234	439.159	20.0497		-17.591	-2.41592	0.002	0.00161397	0.00166474	0.000761328		56.7749	0.381865	97.6371	530178			0.377879		0.106603
B1557 S 110 1/5/2016 9:30:28 PM (Run: 1)		m-c	261	0.348691	20.1529	0.00133598	5029.5		0.262642	40.5102	17.1506	2.97635	0.586196	6.9046	0.0729156	6.23016	0.902319	13.7145	6.23016	0.058307	2.97635	3.81674e-16		4713.6	1703.18	541.286	65.0832	468.435	25.9092	453.697	27.2943		16.1817	3.1462	0.002	0.00223261	0.00227138	0.000853663		60.2654	0.386119	269.914	526352	0.0373769
B1557 S 112 1/5/2016 9:41:03 PM (Run: 1)		m-c	286.106	0.211497	23.5305	0.000739226	1567.85		1.38174	36.3446	16.7749	3.35193	0.631829	6.98882	0.0768702	6.13255	0.87748	13.0089	6.13255	0.0596128	3.35193	-5.1703e-16		17540.8	4261.72	589.528	72.7005	497.234	27.4763	477.414	28.2198		19.0175	3.98605	0.002	0.00231552	0.00235705	0.000986357		50.7032	0.66082	289.445	530526	0.137582
B1557 S 114 1/5/2016 9:44:30 PM (Run: 1)		m-c	427.651	5.12788	32.8386	0.0119908	10211.5		0.136185	60.5854	16.4316	5.54599	0.593148	8.12735	0.0706874	5.94103	0.730992	14.1468	5.94103	0.0608583	5.54599	2.16127e-16		2580.61	1467.78	634.2	119.393	472.876	30.7246	440.296	25.2848		30.5746	6.8898	0.002	0.00205996	0.00209978	0.00167977		72.6232	1.08296	134.122	507637	0.0472104		0.159242
B1557 S 116 1/5/2016 9:47:57 PM (Run: 1)		m	123.926	0.300822	9.81701	0.00242743	248.984		0.487382	18.6207	16.3413	5.60815	0.625156	6.58917	0.0740924	3.45916	0.524976	13.4967	3.45916	0.0611947	5.60815	0		8024.58	1233.26	646.085	120.492	493.074	25.7368	460.764	15.3823		28.6836	6.55275	0.002	0.00120991	0.00128149	0.00170817		73.1618	0.379993	500.216	529958	0.120116
B1557 S 13 11/26/2019 6:12:03 PM (Run: 1)		m-c	652.198	2.02518	49.2538	0.00310516	1625.02		0.072495	27.643	16.8582	2.28408	0.581398	3.37266	0.071086	2.4815	0.729341	14.0675	2.4815	0.0593182	2.28408	1.56685e-16		1414.6	377.668	578.808	49.6283	465.359	12.5903	442.695	10.6168		23.516	4.8702	465.658	10.7161	442.2	12.6869		36.5788	0.507877	431.934	424387	0.112967
B1557 S 19 11/26/2019 6:23:50 PM (Run: 1)		m-c	329.83	1.27252	26.4184	0.00385812	504.799		0.521124	25.2796	16.3309	3.37928	0.62263	3.99605	0.073746	2.1328	0.52743	13.56	2.1328	0.0612337	3.37928	2.45912e-16		8477.98	1750.49	647.464	72.5871	491.495	15.5694	458.685	9.44292		29.1566	6.67547	491.103	9.5588	452.186	12.2547		36.2754	1.71423	661.248	425639	0.106232		0.243462	0.027604	0.134016	0.66618
B1557 S 20 11/26/2019 6:25:48 PM (Run: 1)		m-c	551.47	3.70768	42.015	0.00672328	3559.71		0.0247961	24.4291	18.1302	3.01962	0.548366	3.6207	0.0721062	1.99783	0.544364	13.8684	1.99783	0.0551565	3.01962	-1.47106e-16		495.07	119.472	418.545	67.4396	443.926	13.0202	448.832	8.66188		-7.23634	-1.10526	443.555	8.83918	448.429	11.8955		71.8829	0.987764	244.8	438657			0.0345339		0.0707036
B1557 S 22 11/26/2019 6:37:56 PM (Run: 1)		m	582.864	3.63414	43.1591	0.00623497	0		0.0889708	30.9582	16.9623	5.97263	0.56416	6.34362	0.0694043	2.13756	0.333014	14.4083	2.13756	0.0589542	5.97263	0		1722.74	511.234	565.379	130.07	454.231	23.2321	432.566	8.94296		23.491	4.7696	454.537	9.19155	431.333	16.7338		75.8945	2.25571	881.072	424768	0.450312		0.0427356
B1557 S 24 11/26/2019 6:41:51 PM (Run: 1)		m	4310.76	284.768	353.627	0.0660599	106613		0.0323744	6.01752	17.3979	1.28532	0.580258	2.11098	0.0732178	1.67457	0.778132	13.6579	1.67457	0.0574782	1.28532	0		643.987	38.1412	509.892	28.2566	464.627	7.87059	455.513	7.36463		10.6648	1.96163	476.549	7.45286	467.831	72.8775		136.616	1.25033	856.26	413174	0.344614	0.186251	3.5898	0.0506857	0.566313	0.651553
B1557 S 58 1/5/2016 7:39:06 PM (Run: 1)		m	3711.49	343.789	368.605	0.0926283	8699.79		0.0305203	20.0682	17.6141	2.8118	0.60932	5.69583	0.0778403	4.95341	0.869656	12.8468	4.95341	0.0567728	2.8118	-2.99196e-16		607.654	120.13	482.684	62.1041	483.131	21.8973	483.219	23.0607		-0.110711	-0.0180329	0.002	0.00185232	0.00192787	0.000783659		232.398	0.752152	1049.98	482551	0.177522	0.0137034	4.17352		0.242373	0.870422
B1557 S 62 1/5/2016 7:49:39 PM (Run: 1)		m	144.624	0.314405	11.1099	0.00217395	5432.36		0.0752077	100.794	16.3927	4.24924	0.611916	6.10002	0.0727515	4.37655	0.717464	13.7454	4.37655	0.0610026	4.24924	0		1465.66	1425.01	639.306	91.399	484.768	23.5131	452.711	19.1334		29.1871	6.61273	0.002	0.00153501	0.001592	0.00128581		66.6095	0.792276	502.979	531703	0.0395628
B1557 S 68 1/5/2016 7:59:59 PM (Run: 1)		m	106.93	0.361115	8.62068	0.0033771	377.398		0.513637	51.0875	15.7778	4.3877	0.653556	5.43208	0.0747874	3.20245	0.589543	13.3712	3.20245	0.0633801	4.3877	1.25397e-16		8378.25	3503.98	721.014	93.1152	510.664	21.8002	464.934	14.365		35.5167	8.95514	0.002	0.00111664	0.00119751	0.00138014		73.1088	0.683481	440.655	531303	0.263445
B1557 S 69 1/5/2016 8:01:43 PM (Run: 1)		m	113.91	0.508164	8.85907	0.00446109	577.003		0.0681605	74.9651	17.2205	3.61338	0.59086	5.57368	0.0737955	4.24376	0.761392	13.551	4.24376	0.0580702	3.61338	1.14933e-16		1332.75	966.87	532.406	79.1312	471.417	21.0196	458.982	18.8008		13.791	2.63772	0.002	0.00150655	0.00156585	0.00103765		76.2203	1.30767	643.533	531293	0.222859
B1557 S 71 1/5/2016 8:08:50 PM (Run: 1)		m	251.988	0.813316	21.0305	0.0032276	2721.07		0.438669	58.6251	16.6216	4.02143	0.644169	6.08352	0.0776556	4.56479	0.750354	12.8774	4.56479	0.0601625	4.02143	-1.92865e-16		7351.53	3613.04	609.397	86.9314	504.884	24.2013	482.114	21.2047		20.8867	4.51002	0.002	0.00171418	0.00177241	0.001199		63.8465	3.98581	172.443	542677	0.136976	0.358862	0.651453	0.058673	0.741543	0.525616
B1557 S 75 1/5/2016 8:15:43 PM (Run: 1)		m-c	228.943	0.528479	17.9837	0.00230834	609.605		0.767862	57.3382	16.3399	3.93992	0.613274	4.75057	0.0726779	2.65424	0.558719	13.7593	2.65424	0.0611999	3.93992	0		11516.3	5033.75	646.282	84.646	485.623	18.3367	452.269	11.5929		30.0199	6.86816	0.002	0.000867917	0.000964522	0.00119451		50.584	1.14155	211.085	525425	0.0501763		0.0346102
B1557 S 95 1/5/2016 8:57:29 PM (Run: 1)		m-wg	234.588	0.240152	17.5023	0.00102372	4387.48		-0.0188338	451.67	17.1342	3.7088	0.569983	4.7535	0.0708312	2.9733	0.625498	14.1181	2.9733	0.0583628	3.7088	1.60361e-16		-384.301	-1752.38	543.422	81.0683	458.004	17.5231	441.162	12.6783		18.8178	3.67728	0.002	0.000971016	0.00105301	0.00107103		80.0475	0.691074	605.43	533497	0.215782
Non-Metamorphic and Concordant
B1557 S 53 1/5/2016 7:30:30 PM (Run: 1)			8110	1021.97	799.557	0.126014	27283.8		0.0259281	3.5932	18.0383	0.946485	0.475911	5.1025	0.0622616	5.01395	0.982645	16.0613	5.01395	0.0554377	0.946485	-2.71485e-16		517.383	18.3547	429.945	21.0961	395.264	16.7062	389.365	18.9446		9.43856	1.49252	0.002	0.00146823	0.00156088	0.000216655		508.429	1.50903	2409.68	495127	0.536899		7.3032	0.0322776	0.529541	3.83687
B1557 S 21 11/26/2019 6:35:58 PM (Run: 1)			6368.07	749.075	531.917	0.11763	1898.78		0.040956	8.94918	15.7532	2.22906	0.618113	2.9753	0.0706214	1.97071	0.653222	14.16	1.97071	0.063479	2.22906	0		811.307	71.1674	724.346	47.2787	488.664	11.5404	439.898	8.37994		39.2695	9.97939	507.797	8.39966	454.148	260.603		179.625	1.09658	1381.96	407790	0.316197	0.388674	7.22147	0.149326	1.63118	3.04127
B1557 S 120 1/5/2016 9:54:50 PM (Run: 1)		z1	678.616	303.506	59.87	0.447242	2139.79		0.0260203	4.97192	16.6413	2.30882	0.593854	4.931	0.0716746	4.35708	0.883609	13.9519	4.35708	0.0600915	2.30882	-3.55973e-16		519.201	25.4855	606.861	49.9306	473.326	18.655	446.237	18.7852		26.4681	5.72319	0.002	0.00150541	0.00156146	0.000674929		602.293	1.79759	3016.11	533021	6.0846		21.3092	0.0119433	1.44996	7.08827
B1557 S 113 1/5/2016 9:42:47 PM (Run: 1)			223.547	89.9206	20.249	0.402245	1797.34		0.0287752	7.61572	17.2271	4.441	0.600251	6.7346	0.074997	5.06284	0.751765	13.3339	5.06284	0.058048	4.441	4.71971e-16		573.398	43.0548	531.579	97.2691	477.393	25.6499	466.191	22.7693		12.3006	2.34644	0.002	0.00184937	0.00189849	0.00127962		524.175	3.17597	1323.65	524391	0.34682		5.24099		0.500685	2.36293
B1557 M 2 11/26/2019 5:42:10 PM (Run: 1)			61.3606	52.1815	12.4079	0.850406	233.772		0.0540295	10.1736	14.627	6.58056	1.38465	8.07915	0.14689	4.6871	0.578718	6.8078	4.6871	0.0683667	6.58056	0		1063.57	105.406	879.685	136.151	882.42	47.6333	883.508	38.6985		-0.434578	-0.123379	879.911	40.2985	855.866	1356.22		263.506	13.062	489.926	390857	3.69605	0.285519	34.0314	0.192485	3.23662	3.29577
B1557 M 1 11/26/2019 5:40:13 PM (Run: 1)			72.8967	69.9791	15.9669	0.959977	494.178		0.0547856	5.82035	13.406	3.94784	1.59944	4.53269	0.155513	2.22707	0.485968	6.43033	2.22707	0.0745934	3.94784	0		1078.07	61.1031	1057.56	79.4788	969.992	28.3188	931.793	19.3217		11.8925	3.93803	967.861	20.1434	905.916	1521.56		209.29	17.6803	610.339	421621	4.7018		40.0175	0.0512207	2.71789	5.53464
B1557 M 6 11/26/2019 5:50:02 PM (Run: 1)			119.299	81.9727	25.7862	0.68712	447.773		0.0595688	4.95571	13.4725	3.92437	1.6747	4.60357	0.163637	2.40671	0.517915	6.11107	2.40671	0.0742255	3.92437	0		1169.52	56.3129	1047.6	79.1248	998.971	29.2676	976.959	21.8176		6.74322	2.20349	997.14	22.8318	954.109	1049.61		166.82	8.96496	593.077	397283	2.16526		24.303	0.0725027	2.20626	3.08511
B1557 M 5 11/26/2019 5:48:04 PM (Run: 1)			284.51	175.103	62.014	0.615455	525.247		0.0610826	3.55944	13.5963	2.63999	1.70431	3.7466	0.168061	2.65847	0.704141	5.95022	2.65847	0.0735494	2.63999	2.53036e-16		1198.37	41.4155	1029.12	53.3775	1010.15	23.975	1001.42	24.6577		2.69185	0.864216	1010.06	25.7342	983.442	944.131		271.458	16.6918	625.487	397725	4.33082		35.0121	0.0723624	1.12779	3.44519
B1557 M 3 11/26/2019 5:44:08 PM (Run: 1)			21.1451	12.3869	4.48749	0.585803	260.201		0.0529939	17.0197	13.1673	6.29727	1.77176	7.7088	0.1692	4.44634	0.575209	5.91016	4.44634	0.0759458	6.29727	0		1043.7	173.127	1093.62	126.098	1035.17	50.0341	1007.7	41.4795		7.85617	2.65306	1032.32	43.356	999.809	1247.71		223.322	27.8529	822.922	409721	1.8265		8.70231	0.15011	4.17594	9.87721
B1557 M 4 11/26/2019 5:46:06 PM (Run: 1)			22.1634	13.2699	4.99225	0.598729	653.374		0.068157	13.1453	13.3588	8.69044	1.77953	9.629	0.172414	4.14655	0.429276	5.79999	4.14655	0.0748568	8.69044	1.96242e-16		1332.68	169.535	1064.67	174.771	1038.01	62.5958	1025.4	39.3094		3.68838	1.21476	1035.04	41.6194	993.674	1274.42		214.212	39.8389	953.812	401235	1.66448		10.3249	0.131277	4.68617	14.6325
B1557 M 7 11/26/2019 5:52:00 PM (Run: 1)			50.1208	36.3951	11.5948	0.726147	544.768		0.0633666	6.08448	13.6818	5.55696	1.74787	5.76948	0.17344	1.55147	0.262877	5.76567	1.55147	0.0730897	5.55696	-4.10317e-16		1241.83	73.2848	1016.44	112.571	1026.37	37.2631	1031.04	14.7827		-1.4363	-0.454563	1023.58	16.1695	1003.88	894.75		347.584	20.6074	679.125	407560	1.72888	0.261003	18.3786	0.207677	2.50007	6.1411
B1557 M 8 11/26/2019 5:53:58 PM (Run: 1)			167.059	21.9771	33.8284	0.131552	3260.64		0.0796361	9.12019	12.955	3.17386	1.90171	6.21167	0.178681	5.33961	0.857982	5.59656	5.33961	0.0771905	3.17386	0		1548.74	135.972	1126.12	63.2478	1081.69	41.336	1059.77	52.1807		5.892	2.0266	1080.31	54.4157	1048.64	239.601		140.305	8.13671	419.842	407780	1.89457		5.5385		0.798528	1.3264
Discordant
B1557 S 10 11/26/2019 5:57:57 PM (Run: 1)		m	4448.45	260.025	370.857	0.0584529	992.051		0.103328	8.22393	13.1014	1.71384	0.73237	3.58942	0.0695899	3.15383	0.873882	14.3699	3.15383	0.0763279	1.71384	-1.69643e-16		1987.49	155.67	1103.67	34.2668	557.943	15.4079	433.684	13.2277		60.7053	22.2709	573.442	12.9305	433.555	67.8838		89.2302	2.08384	939.839	431451	0.321578		1.93195		0.811367	0.345572
B1557 S 100 1/5/2016 9:06:05 PM (Run: 1)			95.7909	0.596284	8.26814	0.00622485	633.395		0.552255	41.0099	14.7855	7.78651	0.729752	12.0987	0.0782544	9.26005	0.765377	12.7788	9.26005	0.067634	7.78651	-1.95508e-16		8887.46	2949.02	857.388	161.666	556.407	51.8274	485.695	43.3231		43.3518	12.7087	0.002	0.0035954	0.0036232	0.00262698		32.0521	1.73004	217.224	524378	5.99914		0.0209742			0.170203
B1557 S 104 1/5/2016 9:20:08 PM (Run: 1)			50.558	0.304878	4.3774	0.00603026	102.864		0.6622	55.2832	14.4125	7.87519	0.746032	9.83378	0.0779821	5.88936	0.598891	12.8235	5.88936	0.0693843	7.87519	1.51723e-16		10270.6	4451.55	910.186	162.162	565.92	42.6634	484.067	27.4644		46.8167	14.4637	0.002	0.00225281	0.00229632	0.0027258		66.2608	1.25374	323.602	534316	0.0694361
B1557 S 105 1/5/2016 9:21:51 PM (Run: 1)			21.5383	0.249673	6.4361	0.011592	81.1129		11.5889	37.4652	2.92854	17.1809	5.83126	22.9014	0.123854	15.1423	0.661196	8.074	15.1423	0.341468	17.1809	0		51193.7	6970.99	3669.35	262.416	1951.07	198.496	752.71	107.575		79.4866	61.4206	0.002	0.00935057	0.0093772	0.0293194		53.7073	1.25297	218.213	482511	0.0624586	0.202497	0.341292	0.021403	0.070227
B1557 S 107 1/5/2016 9:25:18 PM (Run: 1)			3392.24	228.798	379.352	0.0674474	222.163		0.259719	24.0495	9.68078	14.9627	1.10388	15.2879	0.0775052	3.13642	0.205157	12.9024	3.13642	0.103297	14.9627	3.33979e-16		4666.75	1002.19	1684.2	276.188	755.225	81.4478	481.215	14.5433		71.4277	36.282	0.002	0.00111136	0.00121544	0.00772315		192.756	2.78622	912.697	598244	0.339283	2.78984	13.8366	1.81741	21.0066	6.84854
B1557 S 109 1/5/2016 9:28:45 PM (Run: 1)			282.867	1.11147	42.2971	0.00392931	172.228		14.61	45.2332	6.09044	7.41491	1.79562	8.22329	0.0793162	3.55552	0.432372	12.6078	3.55552	0.164192	7.41491	2.68882e-16		55541.2	8556.91	2499.29	124.824	1043.87	53.6305	492.04	16.8436		80.3128	52.8638	0.002	0.0013345	0.00141005	0.00607156		72.4567	1.78483	610.861	521950	0.104556
B1557 S 111 1/5/2016 9:39:20 PM (Run: 1)			532.503	6.86365	47.1908	0.0128894	464.675		0.654811	6.67446	11.2035	2.83255	0.901619	5.56497	0.0732617	4.79015	0.860768	13.6497	4.79015	0.0892575	2.83255	0		10180.6	533.822	1409.7	54.2133	652.592	26.7912	455.776	21.0785		67.6686	30.1591	0.002	0.0017029	0.00175467	0.00124152		70.9911	0.655273	263.795	533030	0.104827	0.102988	0.160226	0.0226081		0.126583
B1557 S 117 1/5/2016 9:49:40 PM (Run: 1)			567.835	272.596	58.9256	0.480062	416.347		0.046945	11.7146	10.3593	10.9171	0.981527	11.2248	0.0737449	2.61055	0.232569	13.5603	2.61055	0.0965315	10.9171	-2.50465e-16		927.26	106.171	1558.13	204.823	694.388	56.4563	458.678	11.5579		70.5624	33.945	0.002	0.00086348	0.000962573	0.0052629		761.118	29.8034	3163.08	552627	3.76334	0.943816	22.1722	0.712632	7.49073	11.7229
B1557 S 118 1/5/2016 9:51:24 PM (Run: 1)			432.662	209.637	49.4538	0.48453	458.288		0.0517093	6.31307	10.4515	7.79738	1.07189	9.04564	0.0812507	4.58525	0.506902	12.3076	4.58525	0.09568	7.79738	0		1019.03	62.7374	1541.48	146.615	739.666	47.5174	503.584	22.2117		67.3312	31.9175	0.002	0.00180313	0.00186277	0.00372152		414.446	16.8037	2043.74	521111	1.34716	0.447962	15.4377	0.236738	3.62784	4.23818
B1557 S 119 1/5/2016 9:53:07 PM (Run: 1)			748.484	9.12357	60.4806	0.0121894	712.535		0.371707	18.0227	14.4957	5.61909	0.671657	7.54615	0.0706134	5.03688	0.667477	14.1616	5.03688	0.0689857	5.61909	2.53674e-16		6388.17	987.124	898.29	115.921	521.72	30.7862	439.85	21.4158		51.0347	15.6922	0.002	0.00173055	0.00177835	0.00192943		74.0938	2.01177	451.085	524544	0.0527316	0.122697	0.591724	0.102558	0.756113	0.0425351
B1557 S 12 11/26/2019 6:10:05 PM (Run: 1)			2368.74	2.76284	204.094	0.00116637	482.027		8.319	34.7082	10.6787	7.39538	0.891377	7.47224	0.0690363	1.06896	0.136319	14.4851	1.06896	0.0936446	7.39538	9.1021e-16		45114.6	6262.47	1500.94	139.808	647.109	35.7572	430.347	4.45003		71.3282	33.497	655.891	5.57207	407.74	10.9875		55.0102	3.60207	720.385	427619	0.133535	0.264453	0.436383	0.0359837	0.252689	0.299809
B1557 S 121 1/5/2016 10:03:44 PM (Run: 1)			131.897	1.06079	13.2735	0.00804255	243.815		1.81491	63.6644	12.7616	18.6925	0.867979	24.1346	0.0803367	15.2667	0.632563	12.4476	15.2667	0.0783599	18.6925	-3.95653e-16		20918.1	8296.59	1156.02	370.862	634.469	113.869	498.132	73.1842		56.9097	21.4883	0.002	0.00611528	0.00613237	0.00732071		82.1872	1.11062	302.871	535894	0.284896	0.228717	0.467027	0.042305	0.123556	0.194618
B1557 S 14 11/26/2019 6:14:00 PM (Run: 1)			400.519	240.534	44.4379	0.600556	350.791		0.0428118	6.53851	9.63131	3.58044	1.10764	4.50434	0.0773721	2.73304	0.60239	12.9246	2.73304	0.103828	3.58044	1.81177e-16		847.309	54.2562	1693.65	66.0098	757.04	24.0361	480.418	12.6527		71.6342	36.5399	759.174	12.054	444.181	1436.35
B1557 S 15 11/26/2019 6:15:58 PM (Run: 1)			535.124	2.92586	41.7427	0.00546763	1458.86		0.681849	19.7771	13.7798	5.42417	0.693511	5.80612	0.0693101	2.07109	0.352239	14.4279	2.07109	0.0725697	5.42417	-3.15982e-16		10508.2	1620.6	1001.96	110.123	534.908	24.1424	431.998	8.65388		56.8847	19.2388	536.001	8.7537	421.245	13.4878		43.9885	5.20534	722.539	419929	0.803233		0.327445	0.0165005	0.115872
B1557 S 17 11/26/2019 6:19:54 PM (Run: 1)			201.875	0.394055	16.5487	0.00195197	735.114		1.13502	30.4101	14.0234	5.67635	0.734622	6.61294	0.0747164	3.39265	0.510637	13.3839	3.39265	0.0713094	5.67635	-1.83824e-16		15330.5	3267.63	966.287	115.874	559.262	28.437	464.508	15.2047		51.9286	16.9428	559.034	15.1891	456.702	15.878		54.7936	1.45883	436.617	420764	0.079089	0.0193698	0.0361599
B1557 S 18 11/26/2019 6:21:52 PM (Run: 1)			340.051	126.023	80.1807	0.370601	1681.94		0.0591955	4.48678	6.76629	2.16327	3.79151	3.6582	0.186064	2.95003	0.80144	5.37451	2.95003	0.147791	2.16327	-1.39364e-16		1162.39	50.6827	2320.54	37.0897	1590.95	29.3925	1100.02	29.833		52.5965	30.8579	1594.79	28.8751	1098.26	629.418
B1557 S 23 11/26/2019 6:39:54 PM (Run: 1)			3879.72	305.518	355.066	0.0787474	493.097		0.138893	5.46642	10.3477	1.42755	0.948327	3.17286	0.0711706	2.83358	0.887114	14.0507	2.83358	0.0966398	1.42755	2.26696e-16		2628.72	134.745	1560.24	26.7759	677.231	15.6811	443.204	12.1365		71.5938	34.5564	696.005	11.4921	430.579	182.788		78.4714	2.22829	755.269	411543		0.0545315	3.20671		1.25054	2.72017
B1557 S 27 11/26/2019 6:47:44 PM (Run: 1)			2708.91	214.789	245.954	0.07929	1513.08		0.0718141	8.98288	14.108	2.42316	0.764104	4.33019	0.0781837	3.58871	0.825322	12.7904	3.58871	0.0708818	2.42316	0		1401.77	121.652	953.993	49.5591	576.375	19.0443	485.273	16.7757		49.1325	15.8061	584.791	16.633	482.192	124.98		414.976	1.34855	843.57	420071	0.208838	0.0806993	4.116
B1557 S 42 1/5/2016 7:04:25 PM (Run: 1)		m	847.323	2.40867	81.1794	0.00284268	417.757		4.52452	15.5445	9.74429	7.63485	1.0467	12.2142	0.0739725	9.53394	0.780561	13.5185	9.53394	0.102624	7.63485	0		34546.5	2573.15	1672.11	141.145	727.246	63.4254	460.045	42.3319		72.4872	36.7415	0.002	0.00349821	0.00352625	0.00390801		105.497	3.46733	773.523	491438	1.01662	1.75487	6.13417	0.650146	4.51549	1.18542
B1557 S 48 1/5/2016 7:14:45 PM (Run: 1)			708.678	249.706	93.5376	0.352355	152.789		0.112275	12.3921	6.09223	4.02053	1.77689	5.90136	0.0785117	4.31988	0.732015	12.737	4.31988	0.164144	4.02053	-4.13713e-16		2150.72	252.83	2498.79	67.6856	1037.04	38.3428	487.233	20.2721		80.5013	53.017	0.002	0.00163015	0.00169581	0.0032705		581.768	23.6528	3525.32	608267	2.28288	6.86844	31.3553	2.0531	13.0657	14.1472
B1557 S 49 1/5/2016 7:16:28 PM (Run: 1)			1689.21	1.03713	137.488	0.00061397	815.689		9.64292	23.3628	12.7285	7.77679	0.723142	9.20975	0.0667574	4.93367	0.535701	14.9796	4.93367	0.0785638	7.77679	0		47799.6	4278.44	1161.17	154.177	552.52	39.2446	416.591	19.9032		64.1232	24.6017	0.002	0.00159451	0.0016468	0.00304766		73.8075	1.35995	613.235	482853	0.122123	0.358477	0.855756	0.121773	1.04822	0.226933
B1557 S 51 1/5/2016 7:27:03 PM (Run: 1)			188.306	89.8072	29.208	0.476922	318.733		0.106418	25.0065	8.32464	25.4781	1.55041	27.9738	0.0936078	11.5499	0.412882	10.6829	11.5499	0.120125	25.4781	3.84509e-16		2044.01	486.14	1958.09	454.805	950.658	172.67	576.839	63.7303		70.5408	39.3222	0.002	0.00537806	0.00540579	0.0152994		358.515	5.60482	1555.62	575710	1.09691	0.568951	8.62213	0.330745	2.97198	3.34247
B1557 S 54 1/5/2016 7:32:13 PM (Run: 1)		m	549.346	13.9191	43.495	0.0253375	8680.54		0.141635	14.6397	14.525	4.49784	0.667477	7.43341	0.0703156	5.91819	0.796161	14.2216	5.91819	0.0688467	4.49784	-1.3423e-16		2677.34	367.103	894.167	92.8482	519.177	30.2131	438.057	25.0638		51.0095	15.6248	0.002	0.00203897	0.00208071	0.00153737		67.7775	0.651491	174.892	502827	0.0168903		0.416602	0.0271307	0.213649	0.336527
B1557 S 56a 1/5/2016 7:35:40 PM (Run: 1)			317.486	3.41471	29.8589	0.0107555	1992.44		0.674577	26.6915	13.8786	7.76424	0.80524	10.2289	0.0810529	6.65929	0.651029	12.3376	6.65929	0.0720535	7.76424	1.37265e-16		10420.6	2173.26	987.447	157.982	599.78	46.3284	502.404	32.186		49.1209	16.2352	0.002	0.00265675	0.00269877	0.00279059		46.8441	2.59001	229.797	524979	0.0971806	1.27725	18.3255	0.593875	4.59463	2.11315
B1557 S 56b 1/5/2016 7:35:40 PM (Run: 1)			374.838	4.03155	35.2654	0.0107555	1992.44		0.674852	26.6914	13.8789	7.76424	0.805507	10.2288	0.0810818	6.65921	0.651025	12.3332	6.65921	0.0720518	7.76424	0		10423.9	2173.78	987.395	157.983	599.93	46.3367	502.577	32.1963		49.1007	16.2275	0.002	0.0026577	0.00269971	0.00279052		55.3062	3.05788	271.308	619813	0.114736	1.50798	21.6359	0.701154	5.42462	2.49488
B1557 S 57 1/5/2016 7:37:23 PM (Run: 1)			450.151	13.9761	71.7242	0.0310475	93.8536		1.77381	26.4535	5.34108	20.7293	2.25076	22.8217	0.0871882	9.54604	0.418288	11.4694	9.54604	0.187228	20.7293	0		20620.9	3419.21	2717.97	341.684	1197.03	160.444	538.886	49.3508		80.1732	54.9812	0.002	0.00412962	0.00416151	0.0193991		109.811	12.097	253.605	472462	0.0174567	1.75061	3.95651	0.856347	4.97724	2.27008
B1557 S 59 1/5/2016 7:40:49 PM (Run: 1)			766.622	0.865734	64.7994	0.00112929	280.351		8.44358	36.6843	12.186	13.6737	0.773383	14.9465	0.0683526	6.03564	0.403816	14.63	6.03564	0.0820613	13.6737	1.74587e-16		45383	6629.53	1246.99	267.738	581.702	66.1854	426.223	24.8933		65.82	26.7283	0.002	0.00202251	0.00206276	0.00560613		67.4094	3.58893	432.073	522154	0.0558602	0.155494	1.57052	0.0764101	1.00544	0.674809
B1557 S 60 1/5/2016 7:42:33 PM (Run: 1)			570.798	230.745	56.3638	0.404251	536.258		0.0421622	11.3077	11.8474	10.2074	0.873077	11.1973	0.0750194	4.60331	0.411108	13.3299	4.60331	0.0844069	10.2074	1.5187e-16		834.714	92.4645	1301.95	198.311	637.237	52.9958	466.325	20.7084		64.1827	26.8207	0.002	0.0016695	0.00172669	0.00430196		950.084	4.5701	3103.99	582937	2.71804	6.39379	33.1121	2.62059	18.2801	12.1552
B1557 S 61 1/5/2016 7:47:56 PM (Run: 1)			706.44	2.05421	70.8474	0.00290783	281.868		3.84223	18.2581	11.8574	8.30885	0.946589	8.97878	0.081405	3.40317	0.379024	12.2843	3.40317	0.0843353	8.30885	-2.5369e-16		31882.1	2928.23	1300.3	161.464	676.325	44.3338	504.504	16.5145		61.2011	25.4052	0.002	0.00129921	0.00138518	0.00349641		81.0057	0.66669	468.115	568349	0.12724		0.0298905
B1557 S 63 1/5/2016 7:51:23 PM (Run: 1)			94.0751	0.381952	16.308	0.00406007	121.716		14.1112	35.11	4.51044	6.12075	2.92662	9.42197	0.0957379	7.1631	0.760255	10.4452	7.1631	0.221708	6.12075	-1.60808e-16		54884.9	6626.87	2993.13	98.4474	1388.82	71.3048	589.383	40.3456		80.3088	57.5623	0.002	0.0033837	0.0034289	0.00675925		72.3804	1.50386	325.25	547855	0.0623007	0.28488	0.497335	0.0770933	0.52465	0.309899
B1557 S 64 1/5/2016 7:53:06 PM (Run: 1)			16.0899	0.244345	3.1005	0.0151863	149.51		4.85453	39.6514	4.7637	21.7961	2.87622	23.1592	0.0993724	7.82812	0.338014	10.0632	7.82812	0.209921	21.7961	-3.29672e-16		35719.2	6645.48	2904.93	353.254	1375.7	174.489	610.73	45.6139		78.9761	55.606	0.002	0.00384688	0.0038895	0.0228704		90.3139	0.35836	209.747	571182	0.141269	0.224199	2.35601	0.136539	0.281963	0.192457
B1557 S 66 1/5/2016 7:56:33 PM (Run: 1)			959.956	543.104	95.9392	0.565759	593.032		0.0361075	4.21325	11.6181	4.84151	0.855406	5.68535	0.0720784	2.98043	0.52423	13.8738	2.98043	0.0860728	4.84151	0		716.944	29.6772	1339.82	93.564	627.612	26.6146	448.665	12.9174		66.513	28.5123	0.002	0.000985506	0.00107412	0.00207092		845.955	4.05488	4971.33	561082	8.07667	0.564798	43.992	0.477238	6.77252	15.2071
B1557 S 67 1/5/2016 7:58:16 PM (Run: 1)			86.4887	0.0961235	6.83158	0.0011114	101.474		0.295751	87.6486	15.3778	5.88584	0.668036	7.53286	0.0745064	4.70116	0.624087	13.4217	4.70116	0.0650287	5.88584	-1.27275e-16		5236.78	4043.55	775.287	123.814	519.517	30.6326	463.248	21.014		40.2482	10.831	0.002	0.00169751	0.00175133	0.00190586		80.4165	0.507862	319.749	532551	0.0700888
B1557 S 73 1/5/2016 8:12:16 PM (Run: 1)			613.549	1.46963	53.617	0.0023953	744.769		0.602184	36.4666	14.8506	6.68536	0.741821	11.9002	0.0798992	9.84489	0.827284	12.5158	9.84489	0.0673373	6.68536	-2.17603e-16		9527.35	2770.28	848.224	139.007	563.468	51.4614	495.521	46.9557		41.5814	12.0587	0.002	0.00390498	0.00393299	0.00224369		59.4108	2.256	704.719	449968	1.56495	0.173129	0.356637	0.0915321	0.403614	0.216733
B1557 S 74 1/5/2016 8:13:59 PM (Run: 1)			4536.48	447.113	606.22	0.0985593	233.817		0.266869	37.3808	11.0347	19.9843	1.00555	21.85	0.0804749	8.83461	0.40433	12.4262	8.83461	0.0906234	19.9843	-3.9372e-16		4781.15	1591.58	1438.69	380.981	706.622	111.238	498.957	42.4181		65.3188	29.3885	0.002	0.00350842	0.00355482	0.00905201		281.906	8.0509	1300.87	471696	1.4273	1.55769	9.39609	1.03612	4.61406	3.02213
B1557 S 76 1/5/2016 8:17:26 PM (Run: 1)			59.6507	0.5525	6.0672	0.00926226	112.42		1.40599	62.3922	10.6098	18.1203	1.06273	20.9692	0.0817769	10.5527	0.503249	12.2284	10.5527	0.0942524	18.1203	-1.47314e-16		17745.5	7369.38	1513.18	341.998	735.17	109.696	506.72	51.4252		66.5128	31.0744	0.002	0.00428904	0.00431485	0.00853572		75.6276	3.49082	228.373	448313	2.46915	0.0789286	0.0909152	0.0178679	0.0406486	0.13339
B1557 S 79 1/5/2016 8:22:36 PM (Run: 1)			1722.17	457.043	269.992	0.265388	115.065		0.139093	29.1645	9.35194	28.7344	1.49976	32.4214	0.101724	15.016	0.463152	9.83055	15.016	0.10693	28.7344	-2.8047e-16		2632.28	719.802	1747.73	526.164	930.289	197.508	624.503	89.3764		64.2679	32.87	0.002	0.00761149	0.00763743	0.0153601		195.995	33.3458	968.951	443003	1.25602	16.3931	50.5776	8.40595	57.669	26.6196
B1557 S 80 1/5/2016 8:24:19 PM (Run: 1)			203.889	1.75001	17.3827	0.00858316	514.484		0.874269	38.8393	11.6058	20.1242	0.854314	22.077	0.0719102	9.07786	0.411192	13.9062	9.07786	0.086164	20.1242	-1.54871e-16		12697.7	3661.82	1341.87	388.794	627.014	103.277	447.654	39.2585		66.6397	28.6054	0.002	0.00323738	0.00326396	0.00866687		53.1611	3.86725	445.521	415315	1.20016	0.13755	0.16814	0.0342691	0.216557	0.26567
B1557 S 81 1/5/2016 8:29:43 PM (Run: 1)			125.449	1.79102	14.6076	0.0142769	803.147		1.27102	47.8107	8.82514	26.0492	1.38875	32.8416	0.0888885	20.0002	0.608991	11.2501	20.0002	0.113313	26.0492	0		16578.6	5408.41	1853.19	470.858	884.167	193.869	548.96	105.248		70.3776	37.9122	0.002	0.00887418	0.00888896	0.0147554		59.0585	3.06426	285.992	376893	0.895015	0.0883676	0.202259	0.0329784	0.144277
B1557 S 82 1/5/2016 8:31:26 PM (Run: 1)			304.557	1.83032	33.7534	0.00600978	906.597		1.48767	43.3419	12.124	18.0826	1.0708	21.4963	0.0941571	11.6237	0.540728	10.6205	11.6237	0.082481	18.0826	2.70348e-16		18420.3	5238.83	1256.97	353.564	739.133	112.866	580.076	64.4814		53.8512	21.5194	0.002	0.00544495	0.00547225	0.00745413		57.4544	2.19828	431.837	459134	0.495381	0.126539	0.465033	0.070836	0.668394	0.175469
B1557 S 83 1/5/2016 8:33:09 PM (Run: 1)			476.423	14.2988	85.3185	0.0300128	88.2346		2.01124	29.5114	6.20546	22.411	2.25485	27.3587	0.101482	15.6922	0.573574	9.85394	15.6922	0.161148	22.411	-1.62845e-16		22280.9	3984.01	2467.75	378.462	1198.3	192.448	623.09	93.2		74.7507	48.0022	0.002	0.00794032	0.00796242	0.0180524
B1557 S 85 1/5/2016 8:36:36 PM (Run: 1)			1091.82	8.35874	88.9541	0.00765582	1060.59		0.753479	46.592	13.6587	9.97088	0.696855	11.8011	0.0690319	6.31253	0.534909	14.4861	6.31253	0.0732135	9.97088	0		11351.2	4046.64	1019.85	201.883	536.91	49.2097	430.32	26.2773		57.8057	19.8525	0.002	0.00214013	0.00217883	0.00364479		67.615	5.46647	174.872	445086	0.431373	0.239188	0.641288	0.123184	0.547479	0.249125
B1557 S 87 1/5/2016 8:40:02 PM (Run: 1)			305.461	6.24235	43.2039	0.0204358	194.807		2.03681	18.3254	6.99095	11.3389	1.7236	12.9817	0.0873919	6.32091	0.48691	11.4427	6.32091	0.143042	11.3389	1.98121e-16		22451.8	2484.27	2264.37	195.57	1017.37	83.4168	540.094	32.7479		76.1482	46.9126	0.002	0.00271527	0.00276198	0.0081007		86.049	1.74789	538.71	511504	0.551397	0.145849	0.614639	0.0874769	0.379759
B1557 S 88 1/5/2016 8:41:45 PM (Run: 1)			76.0133	0.412503	6.67746	0.00542671	3414.15		1.22282	32.655	12.9383	10.7281	0.810639	13.7344	0.0760682	8.57559	0.624388	13.1461	8.57559	0.07729	10.7281	0		16145	3630.96	1128.71	213.703	602.813	62.436	472.611	39.0792		58.128	21.599	0.002	0.00323231	0.00326165	0.00414076		47.4453	0.28609	186.479	533153	0.0625812
B1557 S 89 1/5/2016 8:43:29 PM (Run: 1)			620.31	1.65916	59.6845	0.00267473	245.019		5.63594	50.8941	12.8228	16.9041	0.802017	17.8913	0.0745873	5.86101	0.32759	13.4071	5.86101	0.0779862	16.9041	0		38251.5	8736.62	1146.53	335.847	597.966	80.8531	463.733	26.2249		59.5534	22.4482	0.002	0.00214191	0.00218578	0.00658814		54.4729	0.93397	335.086	526633	0.0767168		0.151917			0.250474
B1557 S 91 1/5/2016 8:50:36 PM (Run: 1)			276.054	1.59489	38.2196	0.00577744	118.752		6.69712	24.2121	6.75713	10.3158	1.776	13.054	0.087037	7.99952	0.612801	11.4894	7.99952	0.147992	10.3158	0		41249.9	4257.98	2322.85	176.824	1036.72	84.8004	537.989	41.2897		76.8392	48.1065	0.002	0.0034448	0.00348127	0.00762306		83.3233	1.45456	560.581	501846	0.817685	0.0588361	0.0943958	0.0228019	0.149634
B1557 S 93 1/5/2016 8:54:02 PM (Run: 1)			120.777	1.34216	10.3201	0.0111126	181.472		0.57115	37.5181	13.52	9.99568	0.757059	11.7556	0.0742345	6.18709	0.526311	13.4708	6.18709	0.0739643	9.99568	2.27982e-16		9132	2756.68	1040.48	201.755	572.312	51.4301	461.617	27.5621		55.6342	19.3417	0.002	0.00225667	0.00229648	0.00369135		88.5045	1.28529	414.007	532180	0.142822		0.0265057
B1557 S 94 1/5/2016 8:55:45 PM (Run: 1)			731.751	25.9269	87.3039	0.0354313	131.275		0.59628	50.799	12.0782	19.9103	1.01639	22.8312	0.0890355	11.1732	0.489385	11.2315	11.1732	0.0827936	19.9103	-2.60221e-16		9452.73	3835.38	1264.36	388.891	712.098	116.854	549.831	58.8869		56.513	22.7872	0.002	0.0049464	0.00497407	0.00823928		100.123	2.48455	685.112	469082	4.66953	3.1295	0.812917	0.322263	2.61662	0.69006
B1557 S 96 1/5/2016 8:59:12 PM (Run: 1)			2859.21	374.8	515.397	0.131085	393.196		0.521183	55.8077	12.8025	19.8112	0.994878	23.9466	0.0923773	13.452	0.561751	10.8252	13.452	0.0781094	19.8112	2.39737e-16		8478.77	3864.7	1149.65	393.428	701.206	121.263	569.581	73.3328		50.4562	18.7712	0.002	0.0061843	0.00621331	0.0077344		199.37	1.35945	1160.08	398799	0.714843	0.191011	3.65895	0.0605668	0.765479	1.85301
B1557 S 98 1/5/2016 9:02:38 PM (Run: 1)			48.5013	0.218261	4.3028	0.0045001	2805		1.05839	34.4828	11.3973	7.92838	0.942845	9.70518	0.0779364	5.59743	0.576747	12.831	5.59743	0.0877401	7.92838	-3.17112e-16		14591.6	3583.71	1376.78	152.436	674.37	47.8229	483.794	26.0888		64.8605	28.2599	0.002	0.00213522	0.00218122	0.00347031		37.8022	0.761125	237.653	532649	0.0991779		0.0347395
B1557 S 99 1/5/2016 9:04:22 PM (Run: 1)			1781.69	205.819	214.832	0.115519	165.889		0.262406	35.9908	10.3719	23.3413	1.03205	24.8645	0.0776351	8.56914	0.344633	12.8808	8.56914	0.0964145	23.3413	3.01371e-16		4709.83	1512.1	1555.87	438.052	719.954	128.226	481.992	39.7963		69.021	33.0524	0.002	0.00329222	0.00332633	0.0112493		164.181	3.07058	720.99	468282	1.38265	0.539873	4.6521	0.292469	2.11121	1.43599
Jan 5th, 2016
Isotope ratio and date errors do not include systematic calibration errors of 0.53% (207Pb/206Pb) and 1.17% (206Pb/238U) (all 2-sigma).
Trace element concentrations were deleted from analyses known to have intersected inclusions of other minerals based on P and Ti.
Ablation used a laser spot size of 25 microns, and a laser firing repetition rate of 10 Hz.
Activity of TiO2 for Ti-in-Zircon temperature calculation is 0.8.
Nov 26th, 2019
Isotope ratio and date errors include systematic calibration errors of 0.33% (207Pb/206Pb) and 0.61% (206Pb/238U) (all 2-sigma).
Trace element concentrations were deleted from analyses known to have intersected inclusions of other minerals based on P and Ti.
Ablation used a laser spot size of 16 microns, and a laser firing repetition rate of 10 Hz.
Activity of TiO2 for Ti-in-Zircon temperature calculation is 0.8.
B1559 Paragneiss, Cormack's Lake (48.32095° N, 57.72163° W)
Metamorphic
B1559 S 7 1/5/2016 5:35:41 PM (Run: 1)			549.425	5.74288	37.2593	0.0104525	1453.85		0.0384405	19.8591	17.8667	2.17563	0.489961	4.89536	0.0634899	4.38534	0.895815	15.7505	4.38534	0.0559701	2.17563	0		762.403	148.586	451.171	48.3147	404.884	16.3456	396.814	16.8769		12.0479	1.99313	0.002	0.0013376	0.00139212	0.000590138
B1559 S 10 1/5/2016 5:40:50 PM (Run: 1)			854.873	2.9049	59.7414	0.00339805	1088.18		0.205055	13.334	16.6271	2.32593	0.534055	4.22627	0.0644021	3.52865	0.834933	15.5274	3.52865	0.0601429	2.32593	4.38643e-16		3770.07	458.603	608.73	50.2845	434.497	14.9394	402.342	13.7633		33.9048	7.40065	0.002	0.00106587	0.00113626	0.000680677		122.619	9.51284	2119.51	496133	0.718026	0.660236	5.39109	1.03352	9.69195	5.33677
B1559 S 9 1/5/2016 5:39:07 PM (Run: 1)			399.952	4.12316	27.764	0.0103091	2817.53		0.0628911	26.2621	17.5739	2.98275	0.510131	5.2907	0.0650201	4.36975	0.82593	15.3799	4.36975	0.0569027	2.98275	0		1232.79	314.082	487.747	65.8221	418.537	18.1472	406.084	17.1975		16.743	2.97557	0.002	0.00136523	0.00142061	0.000834861		1549.88	1.48296	1999.08	487734	0.18144	0.133693	1.01637	0.233156	3.83951	7.74922
B1559 S 14 1/5/2016 5:54:48 PM (Run: 1)			138.723	1.75022	9.54709	0.0126167	233.067		0.0422723	107.452	18.293	9.62089	0.491624	10.5028	0.0652256	4.2127	0.401103	15.3314	4.2127	0.0546656	9.62089	0		836.849	880.851	398.584	215.618	406.017	35.1486	407.327	16.6286		-2.19344	-0.322605	0.002	0.00131765	0.00137388	0.00262559		556.549	1.50012	1271.54	262193	0.0385694		0.4098	0.0159091	0.180694	1.64446
B1559 S 11 1/5/2016 5:49:38 PM (Run: 1)			317.781	2.35672	22.8389	0.00741616	5179.94		0.037874	39.2958	17.9313	3.09021	0.522313	5.09841	0.067927	4.05516	0.795378	14.7217	4.05516	0.0557683	3.09021	-5.66018e-16		751.374	289.837	443.187	68.7189	426.695	17.762	423.654	16.6275		4.40741	0.712745	0.002	0.00131545	0.00137727	0.000848668		1416.79	1.59226	1771.69	509846	0.101465		0.534631	0.0311328	0.25669	1.5852
B1559 S 28 1/5/2016 6:26:02 PM (Run: 1)			466.548	0.583569	35.0099	0.00125082	22661		0.0740214	75.2504	17.8967	2.87163	0.545401	4.09178	0.0707925	2.91486	0.71237	14.1258	2.91486	0.0558762	2.87163	0		1443.35	1048.25	447.492	63.8103	441.979	14.6628	440.929	12.4228		1.46664	0.237719	0.002	0.000941159	0.00103175	0.000788261		135.113	4.79266	1463.18	511589	1.34025	0.181821	0.941665	0.16689	1.30249	0.60046
B1559 S 28b 11/26/2019 6:49:42 PM (Run: 1)		m-c	332.611	4.42068	25.0315	0.0132908	445851		0.0297531	24.0251	18.192	4.07447	0.539237	5.01766	0.0711472	2.92842	0.579984	14.0554	2.92842	0.0549693	4.07447	-1.48487e-16		592.601	140.306	410.972	91.1178	437.921	17.8487	443.063	12.5389		-7.80868	-1.17424	436.915	12.7837	441.652	24.5465		881.804	1.75273	2211.26	418066	0.159429	0.0400025	0.639259	0.0217723	0.368074	2.69512
B1559 S 8 1/5/2016 5:37:24 PM (Run: 1)			473.304	30.6148	37.0731	0.0646832	1222.94		0.0378397	10.8149	17.2435	2.26036	0.570946	5.91959	0.0714036	5.47104	0.924227	14.0049	5.47104	0.0579928	2.26036	-2.88563e-16		750.705	79.699	529.478	49.5257	458.626	21.8451	444.606	23.5047		16.0293	3.05694	0.002	0.00190462	0.00195326	0.000636785
B1559 S 37 1/5/2016 6:48:38 PM (Run: 1)			933.453	13.8771	78.6088	0.0148664	1657.22		0.0864629	13.1937	17.231	2.40052	0.616557	5.71475	0.0770519	5.18613	0.907498	12.9783	5.18613	0.0580348	2.40052	4.35431e-16		1676.14	212.224	531.067	52.5822	487.687	22.1314	478.502	23.9171		9.89807	1.88342	0.002	0.00194335	0.001998	0.000679102		3433.68	4.36987	3650.7	603008	0.301038	2.48725	10.4738	1.82467	14.7221	17.9108
B1559 S 13 1/5/2016 5:53:05 PM (Run: 1)			507.388	2.50759	42.7215	0.00494215	4118.29		0.0959113	54.3983	17.6137	2.96554	0.617488	11.3296	0.0788818	10.9346	0.965135	12.6772	10.9346	0.0567741	2.96554	0		1851.16	962.259	482.791	65.4969	488.271	43.9169	489.445	51.5375		-1.37824	-0.240319	0.002	0.00428632	0.0043127	0.000828019		1232.73	2.86953	1528	413793	0.19542	0.0445544	0.469103	0.0210442	0.430232	1.38359
B1559 S 6 1/5/2016 5:33:57 PM (Run: 1)			284.334	4.6122	23.9683	0.0162211	3445.47		0.0495257	20.3643	17.5083	2.94759	0.622908	10.3713	0.0790981	9.94367	0.958763	12.6425	9.94367	0.0571158	2.94759	-4.84136e-16		977.023	194.231	496.03	64.9526	491.668	40.4199	490.737	46.9861		1.06699	0.189372	0.002	0.00390353	0.00393263	0.000827775
B1559 S 17 1/5/2016 5:59:57 PM (Run: 1)			155.097	2.36631	13.1643	0.015257	5408.78		0.062758	43.9364	16.4338	3.18187	0.667798	10.5903	0.0795943	10.101	0.953797	12.5637	10.101	0.0608502	3.18187	-6.59168e-16		1230.26	524.411	633.97	68.4995	519.373	43.0565	493.7	48.0068		22.1256	4.94295	0.002	0.00399179	0.0040199	0.000954313		844.745	4.31024	1460.86	385872	0.10651	0.0182278	0.632064	0.0582794	0.55629	1.76616
B1559 S 18 1/5/2016 6:01:40 PM (Run: 1)			147.719	1.91722	13.5771	0.0129788	235.853		0.184442	48.4917	15.8662	8.54837	0.736811	14.6512	0.0847869	11.8989	0.812143	11.7943	11.8989	0.0630269	8.54837	-1.38761e-16		3421.34	1526.25	709.142	181.765	560.543	63.1112	524.632	59.9526		26.0187	6.40637	0.002	0.005019	0.00504434	0.00268861		706.223	1.62428	1254.94	341234	0.2179		0.572054	0.0337134	0.442477	1.25841
Detrital
B1559 S 29 1/5/2016 6:27:45 PM (Run: 1)			425.836	198.576	36.8184	0.466321	4179.28		0.0295278	5.831	16.1733	3.17317	0.583129	4.47135	0.0684008	3.15023	0.704536	14.6197	3.15023	0.0618304	3.17317	1.77854e-16		588.178	33.8024	668.236	67.9268	466.47	16.7231	426.514	13.0013		36.1732	8.56573	0.002	0.00099733	0.00107739	0.00096698		671.893	14.3146	1549.98	533095	1.28018	2.80806	20.8898	3.28183	26.4034	15.5126
B1559 S 22 1/5/2016 6:15:42 PM (Run: 1)			415.059	131.842	33.8768	0.317645	1020.46		0.0276531	7.45623	16.4161	3.14881	0.574824	4.98284	0.0684391	3.86183	0.775025	14.6115	3.86183	0.0609157	3.14881	1.46537e-16		551.34	40.5535	636.278	67.762	461.13	18.4676	426.745	15.9465		32.9311	7.45667	0.002	0.00125627	0.0013215	0.000945136		468.006	10.1554	1267.1	468742	0.507204	2.0194	14.2959	1.94366	16.272	10.7049
B1559 S 15 1/5/2016 5:56:31 PM (Run: 1)			400.348	214.675	33.9268	0.536221	1560.16		0.0222968	6.13105	16.512	3.75227	0.572512	5.12354	0.0685619	3.48872	0.680919	14.5854	3.48872	0.0605621	3.75227	2.71667e-16		445.714	27.0279	623.731	80.9176	459.638	18.9405	427.486	14.43		31.4631	6.99517	0.002	0.00112271	0.00119597	0.00112462
B1559 S 40 1/5/2016 6:53:48 PM (Run: 1)			1296.8	1013.1	121.679	0.781233	3167.39		0.0223747	3.72651	16.4931	1.57359	0.585745	3.50348	0.0700663	3.1302	0.893456	14.2722	3.1302	0.0606315	1.57359	0		447.255	16.4839	626.197	33.9206	468.147	13.1403	436.555	13.2126		30.2846	6.74825	0.002	0.00101059	0.00109661	0.000448726		1138.43	29.0895	9499.87	533617	13.7683	15.7329	119.633	7.44329	57.6477	45.5912
B1559 S 23 1/5/2016 6:17:25 PM (Run: 1)			479.527	336.925	44.5461	0.70262	1054.74		0.0262415	4.3205	17.6407	2.58594	0.548443	4.27373	0.070169	3.4026	0.796166	14.2513	3.4026	0.0566871	2.58594	2.02731e-16		523.558	22.3299	479.383	57.1471	443.976	15.37	437.174	14.3821		8.80493	1.53203	0.002	0.00111721	0.00119379	0.000717115
B1559 S 4 1/5/2016 5:30:31 PM (Run: 1)			672.184	265.405	58.4086	0.39484	1591.71		0.0293174	8.59518	17.3853	2.50667	0.559353	3.7567	0.0705289	2.79811	0.744831	14.1786	2.79811	0.0575198	2.50667	-2.55748e-16		584.047	49.4815	511.507	55.0911	451.105	13.6829	439.342	11.8837		14.1084	2.60779	0.002	0.000887594	0.000986738	0.000704284		1064.41	3.22957	3700.8	539929	3.22293	1.04022	17.2979	0.523717	6.03418	12.9965
B1559 S 24 1/5/2016 6:19:08 PM (Run: 1)			542.987	404.552	50.8576	0.745049	2522.1		0.0245782	4.85771	17.1161	1.93006	0.569551	4.67709	0.0707026	4.26028	0.910884	14.1438	4.26028	0.0584246	1.93006	2.17527e-16		490.771	23.5531	545.746	42.1712	457.724	17.2331	440.387	18.1352		19.3055	3.78764	0.002	0.00144491	0.00150606	0.000541761		470.349	7.3315	2020.01	513092	1.68767	0.833767	22.1798	1.41736	13.3533	11.0306
B1559 S 32 1/5/2016 6:40:01 PM (Run: 1)			467.179	232.737	40.8459	0.498177	1501.57		0.0241534	6.77283	17.8299	3.01309	0.550647	6.14771	0.0712067	5.3587	0.871657	14.0436	5.3587	0.0560856	3.01309	0		482.389	32.2846	455.74	66.8598	445.421	22.1668	443.421	22.9628		2.70308	0.448852	0.002	0.00186023	0.00190787	0.000831566		840.665	10.1042	3728.06	595623	1.60461	0.184893	16.7752	0.163617	4.00929	10.3499
B1559 S 20 1/5/2016 6:05:08 PM (Run: 1)		z3	327.778	167.797	29.3425	0.511922	1379.42		0.0268657	4.95451	17.8874	2.5672	0.553114	4.81121	0.0717565	4.06906	0.845745	13.936	4.06906	0.0559051	2.5672	-1.70046e-16		535.847	26.1998	448.594	57.0359	447.034	17.3979	446.729	17.5621		0.415777	0.0682041	0.002	0.0013952	0.00145991	0.000701857		585.849	8.07869	1727.73	489464	0.816419	0.109199	8.99165	0.225582	2.64329	3.19883
B1559 S 39 1/5/2016 6:52:05 PM (Run: 1)			242.86	58.8132	20.4763	0.242169	330.913		0.0341761	19.5692	16.9961	3.43259	0.584919	4.78825	0.0721016	3.33836	0.697198	13.8693	3.33836	0.0588369	3.43259	-1.54391e-16		679.232	130.712	561.063	74.8075	467.618	17.943	448.805	14.473		20.0082	4.02324	0.002	0.00112601	0.0012035	0.000997516		797.713	2.89956	3712.35	564072	0.858032	0.384264	7.58374	0.49144	4.91079	8.31244
B1559 S 26 1/5/2016 6:22:36 PM (Run: 1)			529.23	305.55	48.5265	0.577348	638.571		0.0264407	3.7992	17.9433	1.94944	0.554242	4.12189	0.0721276	3.63176	0.881091	13.8643	3.63176	0.055731	1.94944	0		527.48	19.7808	441.655	43.3633	447.772	14.9248	448.961	15.7503		-1.65411	-0.265512	0.002	0.0012366	0.00130975	0.000522404		391.324	12.7744	2509.53	534530	1.89797	0.0103108	16.8325	0.0497958	1.3767	4.29469
B1559 S 25 1/5/2016 6:20:52 PM (Run: 1)		z5	253.338	96.8117	21.7487	0.382144	1459.13		0.0250581	5.57294	17.2986	4.13873	0.577016	5.7326	0.0723934	3.96656	0.69193	13.8134	3.96656	0.057808	4.13873	0		500.237	27.5358	522.502	90.7887	462.542	21.2977	450.559	17.2614		13.769	2.59077	0.002	0.00136984	0.00143576	0.00118624		531.517	7.22432	1303.28	545278	0.688104	0.0324399	6.34114	0.0363193	0.632517	2.48882
B1559 S 21 1/5/2016 6:13:59 PM (Run: 1)		z2	482.807	370.25	46.3666	0.766871	1118.84		0.0249752	3.99214	17.9418	1.47687	0.556552	3.95809	0.0724221	3.67224	0.92778	13.8079	3.67224	0.0557357	1.47687	-1.64676e-16		498.603	19.6614	441.83	32.8507	449.28	14.37	450.731	15.9865		-2.01477	-0.323071	0.002	0.00125653	0.00132975	0.000383659		470.877	9.01103	2319.54	487369	0.991923	0.302192	16.0347	0.625947	6.22571	8.56793
B1559 S 36 1/5/2016 6:46:54 PM (Run: 1)			483.733	256.604	43.4808	0.530466	4195.89		0.0242197	5.42125	17.8251	1.90438	0.562424	4.92573	0.0727101	4.54271	0.922239	13.7532	4.54271	0.0561007	1.90438	-2.06e-16		483.698	25.9112	456.375	42.2524	453.103	18.0039	452.463	19.8493		0.857372	0.141359	0.002	0.00159396	0.0016515	0.000512739		697.7	6.23929	1572.12	582555	0.799155	0.775693	9.8249	0.719203	4.83203	4.86758
B1559 S 27 1/5/2016 6:24:19 PM (Run: 1)			562.812	363.126	53.2046	0.645198	4846.53		0.0253546	5.0495	17.4521	2.72027	0.580868	4.52591	0.0735232	3.61718	0.799216	13.6011	3.61718	0.0572996	2.72027	0		506.081	25.2373	503.066	59.8721	465.019	16.8856	457.347	15.9699		9.08815	1.64984	0.002	0.00125462	0.00132973	0.00076416		574.748	6.42744	2408.62	512952	1.66597	0.127547	16.3145	0.0769981	1.82681	3.7521
B1559 S 2 1/5/2016 5:27:04 PM (Run: 1)			468.29	314.728	45.092	0.67208	12326.7		0.0265221	5.26751	17.676	2.57979	0.576138	5.99995	0.0738601	5.41702	0.902844	13.5391	5.41702	0.0565738	2.57979	0		529.084	27.5079	474.953	57.0549	461.976	22.2695	459.369	24.0182		3.2811	0.564268	0.002	0.00194924	0.00200051	0.000713854		746.039	6.344	2181.92	510686	0.97026	0.0688627	12.5741	0.175138	2.23296	4.81893
B1559 S 1 1/5/2016 5:25:21 PM (Run: 1)			306.676	105.209	26.8741	0.343062	1046.18		0.0264577	5.9232	17.568	2.93121	0.58352	4.3199	0.0743493	3.17326	0.734567	13.45	3.17326	0.0569217	2.93121	1.90907e-16		527.815	30.8589	488.528	64.6747	466.721	16.1635	462.306	14.1565		5.36764	0.946023	0.002	0.0010902	0.00117965	0.000820211		364.487	2.02721	1367.21	510286	1.78415		11.1688		0.91761	2.69276
B1559 S 30 1/5/2016 6:29:28 PM (Run: 1)		z6	159.383	57.3849	13.8971	0.360043	407.433		0.0243459	5.31999	17.3176	3.58423	0.594046	5.16722	0.0746117	3.72202	0.720314	13.4027	3.72202	0.0577446	3.58423	1.32323e-16		486.189	25.5566	520.094	78.6574	473.448	19.5527	463.88	16.6591		10.8084	2.02091	0.002	0.00131657	0.00138853	0.00102328		257.437	3.94223	1029.97	553826	0.759723		5.89795	0.0370735	0.828985	1.36254
B1559 S 12 1/5/2016 5:51:21 PM (Run: 1)			461.363	284.464	44.5012	0.616573	10680.6		0.0273388	8.12957	16.6607	3.38717	0.619281	6.84271	0.0748306	5.94557	0.868891	13.3635	5.94557	0.0600215	3.38717	0		545.158	43.7266	604.344	73.2818	489.397	26.572	465.193	26.684		23.0251	4.94556	0.002	0.00217823	0.00222455	0.00100376		745.601	6.22222	6325.18	455543	2.41614	0.0842887	14.4703	0.209188	5.71897	15.9543
B1559 S 5 1/5/2016 5:32:14 PM (Run: 1)			382.527	249.198	36.934	0.651451	1101.19		0.0264504	5.57297	17.8692	2.04876	0.577757	5.89699	0.0748771	5.52966	0.937708	13.3552	5.52966	0.0559622	2.04876	3.14604e-16		527.671	29.0264	450.898	45.4987	463.019	21.9263	465.472	24.8317		-3.2322	-0.529742	0.002	0.00201974	0.00207022	0.000553353		553.621	14.8424	1953.95	459373	0.826697	0.29749	12.0172	0.499598	6.17878	7.02899
B1559 S 38 1/5/2016 6:50:21 PM (Run: 1)			316.836	270.163	32.5403	0.85269	2324.69		0.0253275	6.57717	17.9982	2.12158	0.588242	6.91363	0.0767862	6.58006	0.951751	13.0232	6.58006	0.0555611	2.12158	-2.54661e-16		505.548	32.8384	434.849	47.2486	469.744	26.0001	476.911	30.2484		-9.67302	-1.5258	0.002	0.00248501	0.00252629	0.000570402		929.441	3.05219	1301.81	471633	0.652879	2.23369	12.4115	0.619591	3.81874	2.75341
B1559 S 31 1/5/2016 6:38:17 PM (Run: 1)			503.905	409.492	53.4613	0.812637	5315.6		0.0290132	11.4863	15.4959	4.13574	0.686157	8.27318	0.0771151	7.16527	0.866085	12.9676	7.16527	0.0645331	4.13574	-2.41017e-16		578.072	65.4588	759.141	87.2274	530.489	34.1844	478.88	33.0696		36.9181	9.72855	0.002	0.00272415	0.00276275	0.00132328
B1559 S 35 1/5/2016 6:45:11 PM (Run: 1)			301.878	189.957	34.6695	0.629252	2870.33		0.0306547	10.8215	16.4461	4.18714	0.755543	11.412	0.0901197	10.6161	0.930258	11.0963	10.6161	0.0608048	4.18714	0		610.291	65.0557	632.36	90.1655	571.436	49.8701	556.245	56.5757		12.0366	2.65829	0.002	0.00475372	0.00478361	0.00126259		376.251	5.28855	1565.07	381674	0.871555	0.0863299	8.48373	0.080297	1.42712	2.72344
B1559 S 33 1/5/2016 6:41:44 PM (Run: 1)		z1b	214.407	106.582	26.5555	0.497103	2482.44		0.0334782	5.34655	16.2993	2.75922	0.856088	5.1253	0.101201	4.31919	0.842719	9.88133	4.31919	0.0613525	2.75922	2.97561e-16		665.586	35.0063	651.635	59.2269	627.985	24.0032	621.443	25.5881		4.63317	1.04165	0.002	0.00210178	0.00218553	0.000830407		56.5073	3.68154	182.82	538708	0.677308	0.0621064	11.8838	0.0618925	0.911256	0.99518
B1559 S 34 1/5/2016 6:43:28 PM (Run: 1)			89.1767	63.6038	28.1625	0.713234	4147.83		0.0673654	6.65272	11.8809	2.39984	2.87213	9.92486	0.247487	9.63035	0.970326	4.04061	9.63035	0.0841685	2.39984	0		1317.7	84.8663	1296.46	46.661	1374.63	74.7495	1425.51	123.162		-9.95388	-3.70097	0.002	0.0118266	0.011917	0.000984612
DISCORDANT ANALYSES
B1559 S 19 1/5/2016 6:03:23 PM (Run: 1)		m	176.465	3.35073	14.3756	0.0189881	1142.29		0.100949	28.4423	15.0379	10.2397	0.687768	12.7918	0.0750115	7.66668	0.599344	13.3313	7.66668	0.0664987	10.2397	0		1943.86	527.123	822.112	213.796	531.459	52.9286	466.278	34.4858		43.283	12.2645	0.002	0.00284049	0.00287544	0.00339999		595.866	10.8265	1089.01	279225	0.190762	1.82887	3.10201	0.392217	3.32394	1.92634
B1559 S 3 1/5/2016 5:28:47 PM (Run: 1)			772.618	652.83	86.4823	0.844958	807.259		0.0339356	5.26926	13.3013	3.87598	0.788132	5.8496	0.0760313	4.38117	0.748968	13.1525	4.38117	0.0751806	3.87598	-2.13084e-16		674.531	34.9563	1073.33	77.8481	590.112	26.1792	472.39	19.9561		55.9883	19.949	0.002	0.00159814	0.00166553	0.00144303		561.587	20.5891	2154.19	497038	1.92454	4.46467	29.6771	2.06472	15.0373	9.57407
B1559 S 41 1/5/2016 7:02:39 PM (Run: 1)		m	1297.93	1.63819	116.943	0.00126215	1316.28		5.6627	25.7793	12.8314	2.77154	0.804303	5.56056	0.0748503	4.82062	0.866931	13.36	4.82062	0.0779336	2.77154	4.10081e-16		38332.8	4428.5	1145.16	55.0761	599.253	25.1686	465.311	21.6405		59.3673	22.3515	0.002	0.00174602	0.00180413	0.00105974		205.917	5.71137	1460.61	501016	0.494298	4.66657	19.8098	3.51676	31.8371	12.0716
Jan 5th, 2016
Isotope ratio and date errors include systematic calibration errors of 0.53% (207Pb/206Pb) and 1.17% (206Pb/238U) (all 2-sigma).
Trace element concentrations were deleted from analyses known to have intersected inclusions of other minerals based on P and Ti.
Ablation used a laser spot size of 25 microns, and a laser firing repetition rate of 10 Hz.
Activity of TiO2 for Ti-in-Zircon temperature calculation is 0.8.
Nov 26th, 2019
Isotope ratio and date errors include systematic calibration errors of 0.33% (207Pb/206Pb) and 0.61% (206Pb/238U) (all 2-sigma).
Trace element concentrations were deleted from analyses known to have intersected inclusions of other minerals based on P and Ti.
Ablation used a laser spot size of 16 microns, and a laser firing repetition rate of 10 Hz.
Activity of TiO2 for Ti-in-Zircon temperature calculation is 0.8.
NLJP01 Paragneiss, North Lake (48.50684° N, 57.86550° W)
Metamorphic
NLJP01 S 173 1/6/2016 12:29:58 AM (Run: 1)			90.657	2.75432	7.30004	0.0303817	392.729		0.00053687	4047.85	18.9001	8.3667	0.565877	9.56101	0.0775684	4.62723	0.483968	12.8918	4.62723	0.0529098	8.3667	3.61829e-16		10.8484	439.009	324.928	189.967	455.345	35.0831	481.593	21.4723		-48.215	-5.76444	0.002	0.00171806	0.00179463	0.00220957		392.046	3.41088	565.115	541988	0.627609		1.06025		0.0375469	0.893709
NLJP01 M 273 1/6/2016 4:19:28 AM (Run: 1)			56.5924	0.171885	10.3708	0.00303724	252.535		0.0821057	159.306	13.8979	4.15588	1.71633	5.49765	0.173002	3.59901	0.654644	5.7803	3.59901	0.0719532	4.15588	-1.17198e-16		1594.92	2443.13	984.591	84.5989	1014.65	35.2716	1028.63	34.2178		-4.47258	-1.37717	0.002	0.00289429	0.00311317	0.00148489		87.2342	1.26022	108.415	542179	0.329445		0.296632
Non-metamorphic
NLJP01 M 232 1/6/2016 2:40:21 AM (Run: 1)			193.044	59.3233	19.3368	0.307305	992.026		0.0282443	7.11428	17.2136	2.92683	0.699247	8.16175	0.0872974	7.61891	0.93349	11.4551	7.61891	0.0580936	2.92683	6.31206e-16		562.964	39.4982	533.29	64.0864	538.341	34.1026	539.534	39.4334		-1.17074	-0.221515	0.002	0.00327524	0.00332556	0.000838323		178.249	5.4616	1094.7	532648	16.7785		10.5048	0.144623	2.40686	5.16427
NLJP01 L 17 1/12/2016 5:48:02 PM (Run: 1)			313.444	145.552	35.1356	0.464364	1153.57		0.0318613	3.9423	16.9611	2.85994	0.74538	4.09108	0.0916915	2.92535	0.709812	10.9061	2.92535	0.0589586	2.85994	0		633.939	24.6039	565.558	62.2803	565.54	17.7401	565.533	15.8389		0.00431735	0.00121525	37.5707	0.872441	0.001	0.474365		183.713	5.70806	2799.12	513093	20.5832	0.0259939	14.0405	0.385869	6.83324	16.0274
NLJP01 L 16 1/12/2016 5:46:19 PM (Run: 1)			360.163	173.391	41.4943	0.481423	38258.9		0.0343475	2.7491	16.5479	1.61154	0.775206	3.36144	0.0930374	2.94995	0.871258	10.7484	2.94995	0.0604308	1.61154	-3.73713e-16		682.581	18.4515	619.011	34.7807	582.745	14.9047	573.476	16.1866		7.35611	1.59061	37.5574	0.872958	0.001	0.474219		183.656	4.74015	3231.13	506132	26.0211	0.012192	15.5035	0.424698	7.80011	19.3536
NLJP01 S 163 1/6/2016 12:05:35 AM (Run: 1)			111.679	37.2371	13.4018	0.333431	553.611		0.0468615	7.84923	15.3602	4.05361	0.890517	12.2935	0.099206	11.606	0.944073	10.08	11.606	0.0651033	4.05361	0		925.649	71.0177	777.656	85.2406	646.647	58.7986	609.754	67.524		21.5908	5.70527	0.002	0.00571787	0.0057569	0.00130971		447.871	7.21925	744.111	539242	1.23172		10.7827	0.0195561	0.94749	1.86304
NLJP01 M 213 1/6/2016 2:00:22 AM (Run: 1)			183.23	164.88	23.8079	0.899853	482.101		0.0275632	5.00542	17.1994	3.01986	0.803522	4.85107	0.100233	3.79649	0.782609	9.9768	3.79649	0.0581417	3.01986	0		549.573	27.1378	535.118	66.1023	598.813	21.9454	615.772	22.2959		-15.0721	-2.83199	0.002	0.0017832	0.00190266	0.000866379		145.822	4.43389	3881.18	627511	7.03776	0.12027	23.6546	0.751821	13.8013	25.8039
NLJP01 M 265 1/6/2016 3:58:34 AM (Run: 1)			46.8553	21.3299	8.32495	0.455229	551.397		0.0464181	9.88844	14.8753	4.78535	1.3797	5.97833	0.14885	3.58342	0.599401	6.71819	3.58342	0.0672257	4.78535	2.04163e-16		917.085	88.6589	844.772	99.5549	880.311	35.1943	894.512	29.9296		-5.88794	-1.61314	0.002	0.00247952	0.00266695	0.00160018		234.041	16.4039	744.691	613544	2.33432		4.26321	0.0447966	0.930167	3.03225
NLJP01 M 203 1/6/2016 1:39:34 AM (Run: 1)			77.1257	39.2714	12.3415	0.509188	454.327		0.0459089	7.36808	14.6416	4.44902	1.22025	5.24474	0.129579	2.77731	0.529542	7.71728	2.77731	0.0682987	4.44902	-2.83808e-16		907.249	65.3688	877.616	92.0805	809.89	29.2685	785.465	20.5382		10.5001	3.01587	0.002	0.00158269	0.00179941	0.00151013		205.762	9.4027	470.425	542419	2.0108		21.8068	0.206375	3.6181	4.11371
NLJP01 M 258 1/6/2016 3:39:21 AM (Run: 1)			14.0061	14.6088	3.05665	1.04303	2465.55		0.0482533	13.4075	14.5509	9.50524	1.51491	10.2979	0.159874	3.96195	0.384734	6.25494	3.96195	0.068724	9.50524	1.85415e-16		952.503	124.744	890.476	196.329	936.424	62.9859	956.075	35.2042		-7.36672	-2.09851	0.002	0.00298804	0.00316706	0.00326193		288.751	32.4973	607.566	627007	1.88022		28.599	0.140721	1.98186	3.77989
NLJP01 S 165 1/6/2016 12:09:02 AM (Run: 1)			29.6131	16.7753	5.87128	0.566483	106.081		0.0569059	9.47022	14.3921	6.92781	1.51111	9.73292	0.157732	6.83632	0.702391	6.33986	6.83632	0.0694825	6.92781	1.4766e-16		1118.66	103.061	913.094	142.589	934.89	59.4708	944.162	60.0417		-3.40256	-0.991774	0.002	0.00528649	0.00539154	0.0024007		276.024	20.458	590.385	556436	0.83133	0.129148	7.05524	0.129557	2.38245	3.64078
NLJP01 S 160 1/6/2016 12:00:25 AM (Run: 1)			19.7034	17.4038	4.45974	0.883292	333.154		0.0555383	9.19136	14.3323	7.96241	1.62092	9.38086	0.168491	4.95991	0.528726	5.93503	4.95991	0.0697724	7.96241	1.76963e-16		1092.48	97.7487	921.667	163.664	978.348	58.9089	1003.79	46.1045		-8.91048	-2.60071	0.002	0.00402179	0.0041785	0.00277244		281.711	25.303	586.32	536659	1.93354		23.7057	0.135444	2.50869	4.38216
NLJP01 S 186 1/6/2016 12:59:34 AM (Run: 1)			97.7796	69.7349	20.9931	0.713185	1293.35		0.0519109	5.62468	14.3279	2.9588	1.61238	4.70777	0.167551	3.66178	0.777815	5.96833	3.66178	0.0697941	2.9588	1.62519e-16		1022.91	56.1035	922.31	60.8108	975.033	29.5037	998.604	33.8752		-8.27195	-2.41746	0.002	0.00285632	0.00306767	0.00101827		155.998	9.8562	390.834	536913	4.86244		35.6501	0.0237284	0.623804	1.624
NLJP01 M 196 1/6/2016 1:23:53 AM (Run: 1)			81.2669	48.654	16.5916	0.598694	766.196		0.0533554	6.43893	14.2991	3.3771	1.56956	4.94717	0.162774	3.6152	0.730761	6.1435	3.6152	0.0699347	3.3771	0		1050.64	65.9219	926.454	69.363	958.252	30.6836	972.173	32.6242		-4.93485	-1.45268	0.002	0.00273701	0.0029423	0.00116844		271.435	20.7699	1335.88	567581	2.13522		5.15671	0.167679	3.79593	8.01512
NLJP01 M 214 1/6/2016 2:02:06 AM (Run: 1)			109.981	112.511	19.9367	1.02301	1496.39		0.0367115	5.65726	14.2842	3.47048	1.31002	4.40731	0.135716	2.71664	0.616394	7.36831	2.71664	0.0700075	3.47048	-3.72932e-16		728.723	40.4915	928.599	71.2569	850.136	25.3785	820.394	20.9273		11.6525	3.49846	0.002	0.00161056	0.00184346	0.00120275		280.923	33.4908	949.744	612425	4.12843		43.6287	0.0962036	2.06545	4.76578
NLJP01 M 231 1/6/2016 2:38:37 AM (Run: 1)			56.4361	30.6778	10.9549	0.543585	278.79		0.0499279	7.07445	14.2458	4.43756	1.5309	5.66715	0.158172	3.52485	0.62198	6.32222	3.52485	0.0701963	4.43756	-2.24039e-16		984.766	67.9969	934.075	91.0383	942.857	34.8069	946.611	31.0324		-1.34204	-0.398114	0.002	0.00258642	0.00278767	0.00154811		190.82	9.36266	385.256	534744	0.345993		3.51601	0.0629888	1.36614	3.35029
NLJP01 M 272 1/6/2016 4:17:44 AM (Run: 1)			131.305	59.2474	23.5394	0.451219	5386.84		0.0514807	5.6071	14.2342	3.49502	1.42343	4.2081	0.146949	2.34371	0.556952	6.80507	2.34371	0.0702535	3.49502	4.30326e-16		1014.64	55.4873	935.755	71.6827	898.802	25.097	883.839	19.3573		5.54804	1.66469	0.002	0.00141665	0.00172203	0.00121577		213.749	5.98584	409.111	525840	1.75839		8.41618	0.0318497	0.589603	1.19949
NLJP01 M 204 1/6/2016 1:41:17 AM (Run: 1)			93.1853	147.778	23.7682	1.58585	2285.88		0.0536142	5.87658	14.0987	3.19895	1.56926	4.72843	0.160463	3.48206	0.73641	6.23198	3.48206	0.0709285	3.19895	1.57798e-16		1055.61	60.4415	955.358	65.4113	958.135	29.3247	959.347	31.0383		-0.417557	-0.126547	0.002	0.00258375	0.0027937	0.00112119		268.731	8.09272	1283.15	543143	3.63651	0.0344151	51.0861	0.453344	5.13968	11.0983
NLJP01 S 159 1/5/2016 11:58:41 PM (Run: 1)			62.7492	20.876	11.9183	0.33269	289.292		0.0556608	6.34694	14.0874	5.02127	1.58756	9.72137	0.162203	8.32418	0.856276	6.16511	8.32418	0.0709853	5.02127	1.67744e-16		1094.83	67.6397	956.995	102.648	965.338	60.5615	969.009	74.8922		-1.25537	-0.380207	0.002	0.00666157	0.00675104	0.00177354		227.603	16.9369	474.843	533957	1.19158		10.9159	0.0715152	1.05911	2.75029
NLJP01 S 162 1/6/2016 12:03:52 AM (Run: 1)			182.145	49.2111	31.1114	0.270176	564.075		0.0516004	6.10645	14.0108	2.06565	1.44532	3.32075	0.146867	2.60009	0.782982	6.80886	2.60009	0.0713736	2.06565	-3.29718e-16		1016.94	60.5624	968.136	42.155	907.932	19.9294	883.38	21.4644		8.75462	2.7042	0.002	0.00162625	0.00190934	0.000715822		202.73	8.57887	601.849	548614	1.94633		6.19965	0.0692918	0.910817	2.26651
NLJP01 S 142 1/5/2016 11:15:05 PM (Run: 1)			45.6164	25.268	9.06008	0.553922	917.677		0.0619006	7.69223	14.0078	4.88392	1.53202	12.2212	0.155644	11.2029	0.916678	6.42492	11.2029	0.071389	4.88392	-2.55946e-16		1213.95	90.6308	968.549	99.6639	943.309	75.083	932.524	97.2652		3.71947	1.14332	0.002	0.00865296	0.00871833	0.00173424		327.702	28.1312	680.227	526949	1.21574	0.0382337	13.6799	0.107654	1.86195	3.75233
NLJP01 M 209 1/6/2016 1:53:29 AM (Run: 1)			75.5128	71.2138	16.541	0.94307	536.864		0.0488285	5.50341	14.0002	4.45379	1.60876	6.29123	0.163351	4.44334	0.706275	6.12177	4.44334	0.0714277	4.45379	0		963.59	51.7861	969.666	90.8705	973.624	39.3933	975.374	40.2198		-0.588631	-0.179716	0.002	0.00346499	0.00362913	0.00158105		145.163	7.14551	485.39	567350	7.60934		50.8463	0.0126479	0.999109	1.58668
NLJP01 S 166 1/6/2016 12:10:45 AM (Run: 1)			23.4045	31.7121	5.08575	1.35495	295.943		0.0504965	10.5986	13.918	7.76646	1.39909	11.4786	0.141228	8.45227	0.736349	7.08074	8.45227	0.0718496	7.76646	0		995.708	102.974	981.683	158.166	888.553	67.9703	851.604	67.428		13.2506	4.15832	0.002	0.00589287	0.00596849	0.00278446		260.201	26.2293	755.174	537706	1.85725	0.0289723	53.2685	0.217539	5.41795	7.47791
NLJP01 M 224 1/6/2016 2:22:56 AM (Run: 1)			100.713	134.392	25.5639	1.33441	594.687		0.0502943	4.54028	13.9133	3.0063	1.74162	4.86385	0.175745	3.82351	0.786107	5.69008	3.82351	0.0718737	3.0063	0		991.818	43.9443	982.378	61.2172	1024.06	31.373	1043.69	36.8425		-6.2407	-1.91608	0.002	0.00315259	0.0033598	0.0010661		300.466	12.4421	1455.2	566632	3.12479	0.357181	42.8192	1.0868	18.8456	23.3276
NLJP01 M 216 1/6/2016 2:05:33 AM (Run: 1)			61.0829	49.1897	11.6538	0.805294	5249.68		0.0424754	5.71912	13.8772	4.66235	1.47088	5.57245	0.14804	3.05199	0.547693	6.75493	3.05199	0.0720604	4.66235	-1.23164e-16		840.786	47.0992	987.674	94.8617	918.489	33.6823	889.967	25.3702		9.8927	3.10537	0.002	0.00203782	0.00225908	0.00167065		190.718	5.02456	559.005	618035	1.95565		14.5983	0.0188833	0.597554	0.984687
NLJP01 S 156 1/5/2016 11:46:21 PM (Run: 1)			85.8395	87.5416	20.5576	1.01983	421.622		0.0593812	5.45794	13.8679	2.47447	1.67547	5.65197	0.168518	5.08151	0.899069	5.93408	5.08151	0.072109	2.47447	-5.59646e-16		1165.94	61.8355	989.037	50.336	999.264	35.939	1003.94	47.2413		-1.50686	-0.467992	0.002	0.00412536	0.00428163	0.000874154		287.381	15.0394	1275.08	532201	1.79926		23.4555	0.180448	4.28476	8.24098
NLJP01 M 275 1/6/2016 4:22:55 AM (Run: 1)			95.0388	179.773	23.5336	1.89158	247.967		0.04369	4.66317	13.8507	3.27334	1.54767	4.57187	0.15547	3.19174	0.698126	6.4321	3.19174	0.0721987	3.27334	0		864.323	39.4552	991.546	66.562	949.565	28.2006	931.555	27.6843		6.05025	1.89661	0.002	0.00225532	0.0024811	0.00116857		342.969	7.04759	4494.5	627163	13.0165	0.0627008	121.483	0.545125	11.7112	26.2151
NLJP01 M 246 1/6/2016 3:11:34 AM (Run: 1)			66.0695	53.3237	15.9618	0.807085	596.615		0.0613605	6.1998	13.8321	2.37567	1.80661	4.32709	0.181239	3.61661	0.835807	5.51757	3.61661	0.0722956	2.37567	0		1203.67	72.4463	994.262	48.2885	1047.85	28.2819	1073.74	35.7713		-7.99379	-2.47053	0.002	0.00305194	0.00327736	0.000840593		211.094	15.5213	546.208	507517	2.85928		24.0702	0.0669894	1.27191	3.21093
NLJP01 M 269 1/6/2016 4:12:34 AM (Run: 1)			97.7255	47.837	21.0187	0.489504	4506.02		0.0601522	6.57494	13.7986	3.34675	1.74593	6.37736	0.174727	5.42863	0.851235	5.72322	5.42863	0.0724712	3.34675	-1.93714e-16		1180.64	75.4028	999.216	67.9746	1025.66	41.1726	1038.1	52.0512		-3.89162	-1.21327	0.002	0.00459826	0.00474264	0.00119987		145.166	6.47058	249.301	533476	1.71044		9.21926	0.0125182	0.493641	1.17107
NLJP01 M 227 1/6/2016 2:28:08 AM (Run: 1)			20.2065	9.83984	4.40202	0.486963	247.435		0.0628069	13.5497	13.7795	7.39573	1.77661	8.83642	0.177551	4.83585	0.547264	5.63218	4.83585	0.0725716	7.39573	-1.95365e-16		1231.19	161.843	1002.01	150.15	1036.94	57.4094	1053.58	47.004		-5.14723	-1.60497	0.002	0.00413221	0.00429305	0.00267778		249.89	13.9565	742.733	534421	2.20424		4.34395	0.114538	2.30262	4.97331
NLJP01 M 249 1/6/2016 3:23:48 AM (Run: 1)			36.9702	28.9605	8.86984	0.783349	554.099		0.0650495	6.48379	13.7379	4.22996	1.79447	6.20637	0.178795	4.54163	0.73177	5.593	4.54163	0.0727913	4.22996	-3.64374e-16		1273.8	80.0416	1008.13	85.7983	1043.45	40.4673	1060.39	44.4065		-5.18403	-1.62318	0.002	0.00388624	0.0040601	0.00152933		244.433	21.8031	632.094	516886	1.96421		15.5916	0.0439723	1.23857	4.58958
NLJP01 L 15 1/12/2016 5:44:35 PM (Run: 1)			84.4898	48.6331	18.1903	0.57561	430.029		0.056477	4.47028	13.7375	3.23588	1.69619	6.47627	0.168998	5.60991	0.864499	5.91724	5.60991	0.0727932	3.23588	0		1110.45	48.3013	1008.22	65.6327	1007.1	41.3693	1006.59	52.2807		0.161596	0.0504934	36.6991	0.908613	0.001	0.46419		258.556	6.59018	1077.45	505983	1.10603	0.0155898	7.06403	0.242301	4.91865	8.80676
NLJP01 M 256 1/6/2016 3:35:54 AM (Run: 1)			72.2653	72.5342	14.8605	1.00372	284.92		0.0465835	7.60403	13.6741	3.82908	1.51304	10.4949	0.150054	9.77147	0.931066	6.66426	9.77147	0.073131	3.82908	0		920.279	68.4091	1017.61	77.5535	935.67	64.1594	901.267	82.1879		11.4326	3.67673	0.002	0.00726425	0.00733125	0.00138881		330.443	17.7678	591.408	608527	1.47099		14.6062	0.0897346	1.2249	2.75358
NLJP01 M 242 1/6/2016 3:04:38 AM (Run: 1)			54.6907	41.7116	11.7752	0.762682	1805.25		0.0486546	6.91517	13.6732	4.53021	1.6974	5.85081	0.168327	3.70259	0.632834	5.94083	3.70259	0.073136	4.53021	2.08943e-16		960.238	64.8495	1017.73	91.7528	1007.55	37.3839	1002.89	34.3884		1.45885	0.463414	0.002	0.00291295	0.00311622	0.00164704		214.952	7.23028	537.801	611604	2.87709		18.5031	0.0318784	1.41229	1.87289
NLJP01 S 178 1/6/2016 12:38:35 AM (Run: 1)			278.638	182.058	59.8182	0.653385	4332.05		0.0551301	4.03565	13.6681	1.74807	1.65935	3.57491	0.164491	3.11837	0.872293	6.07935	3.11837	0.0731632	1.74807	0		1084.67	42.6195	1018.48	35.4007	993.126	22.6494	981.688	28.3957		3.61294	1.15177	0.002	0.00230395	0.00256472	0.000613701		405.445	9.08094	667.205	528394	4.00689	0.102502	41.0172	0.121522	1.88779	3.45326
NLJP01 M 250 1/6/2016 3:25:32 AM (Run: 1)			19.1812	17.3757	4.86608	0.905872	34868.9		0.0627693	9.19293	13.6676	6.69556	1.88132	7.95897	0.186489	4.30286	0.54063	5.36224	4.30286	0.0731657	6.69556	3.63836e-16		1230.48	109.742	1018.53	135.594	1074.53	52.7664	1102.33	43.5979		-8.22745	-2.58732	0.002	0.00382091	0.00401218	0.00244297		308.059	38.9434	633.615	512071	2.31588		25.5627	0.168644	2.75044	5.91158
NLJP01 L 22 1/12/2016 6:03:41 PM (Run: 1)			77.5023	102.033	21.1502	1.31651	546.56		0.0611026	4.54739	13.6642	3.60295	1.79532	4.22482	0.17792	2.20633	0.515494	5.62051	2.20633	0.0731838	3.60295	-4.50467e-16		1198.75	52.9269	1019.05	72.9583	1043.76	27.5517	1055.6	21.4831		-3.58687	-1.13465	36.6028	0.912862	0.001	0.462987		202.894	6.65823	860.682	517992	1.23258		42.4133	0.349679	7.24165	14.644
NLJP01 S 149 1/5/2016 11:34:17 PM (Run: 1)			61.1807	27.3794	11.5211	0.447518	945.331		0.0544417	7.81026	13.6482	5.50322	1.5642	11.3077	0.154834	9.87823	0.873582	6.45851	9.87823	0.0732695	5.50322	-2.57903e-16		1071.47	81.5054	1021.42	111.398	956.132	70.0399	928.006	85.3778		9.14553	2.9416	0.002	0.00757453	0.00764745	0.0020079		210.331	13.2734	400.237	527067	1.11618		6.99218	0.036714	0.544592	1.79482
NLJP01 M 276 1/6/2016 4:24:38 AM (Run: 1)			51.0736	61.9299	13.1146	1.21256	180.334		0.0506823	6.5179	13.5937	4.87111	1.87055	6.05313	0.184418	3.59342	0.593647	5.42245	3.59342	0.0735637	4.87111	2.00238e-16		999.285	63.5485	1029.52	98.4817	1070.73	40.0511	1091.07	36.0683		-5.97795	-1.89989	0.002	0.00307943	0.00331347	0.00178275		310.138	11.916	1499.55	617038	1.77987		30.7322	0.257613	5.88358	12.5435
NLJP01 L 23 1/12/2016 6:05:24 PM (Run: 1)			71.5764	50.8502	17.0912	0.710433	432.917		0.0655909	3.85967	13.5863	3.79397	1.80149	4.82048	0.177515	2.97369	0.612507	5.63334	2.97369	0.0736033	3.79397	1.58775e-16		1284.07	48.0193	1030.62	76.6917	1046	31.4748	1053.38	28.8989		-2.20881	-0.705807	36.6062	0.912709	0.001	0.463031		337.1	29.1389	702.055	529843	1.94791		18.8788	0.129153	2.45853	4.62729
NLJP01 S 182 1/6/2016 12:52:40 AM (Run: 1)			67.7497	41.5107	15.2794	0.612707	3309.2		0.0554621	5.20968	13.5729	3.593	1.83258	5.11089	0.180399	3.63477	0.711181	5.54327	3.63477	0.0736762	3.593	0		1091.02	55.332	1032.63	72.6069	1057.2	33.5743	1069.15	35.8097		-3.53726	-1.13029	0.002	0.0030496	0.00327855	0.0013112		197.756	20.1653	424.706	514296	1.27394		13.9971	0.000906709	1.00561	2.2163
NLJP01 M 225 1/6/2016 2:24:40 AM (Run: 1)			67.2754	42.3938	15.4491	0.630153	780.948		0.058311	6.53615	13.5589	3.61132	1.84884	5.16221	0.181812	3.68875	0.714567	5.50017	3.68875	0.0737522	3.61132	0		1145.51	72.79	1034.68	72.9555	1063.02	34.0171	1076.87	36.5824		-4.07745	-1.30299	0.002	0.00313203	0.0033533	0.00131956		280.82	12.756	629.571	549967	3.57346		16.9234	0.0582535	1.15028	3.26644
NLJP01 M 189 1/6/2016 1:11:50 AM (Run: 1)			120.917	59.7482	23.9932	0.494125	2936.66		0.0472974	4.67939	13.5577	2.37675	1.6705	4.4217	0.16426	3.72861	0.843252	6.08792	3.72861	0.0737589	2.37675	1.98948e-16		934.063	42.7139	1034.85	48.0139	997.376	28.0849	980.406	33.9114		5.26119	1.70148	0.002	0.00285951	0.0030623	0.000857738
NLJP01 M 253 1/6/2016 3:30:42 AM (Run: 1)			99.9198	51.2976	21.0733	0.513387	3606.92		0.0582163	5.95018	13.5572	3.41238	1.73102	4.41335	0.170204	2.79882	0.63417	5.8753	2.79882	0.0737616	3.41238	1.84219e-16		1143.7	66.1627	1034.95	68.9333	1020.13	28.4038	1013.24	26.2423		2.09796	0.67578	0.002	0.00209916	0.00238185	0.00124569		221.111	9.49632	1343.81	507680	2.36567	0.0467316	6.30774	0.532226	9.27171	16.652
NLJP01 M 206 1/6/2016 1:44:43 AM (Run: 1)			76.0409	52.8878	16.2912	0.695517	1086.83		0.0521146	6.52832	13.533	3.76074	1.70843	5.15207	0.167683	3.52145	0.683502	5.96363	3.52145	0.0738937	3.76074	-2.6517e-16		1026.82	65.3597	1038.59	75.928	1011.7	32.9983	999.333	32.599		3.77943	1.2221	0.002	0.00273634	0.00295244	0.00137772		320.29	18.5011	1252.84	554399	2.31636	0.0720426	11.3786	0.439254	8.62066	13.4091
NLJP01 M 197 1/6/2016 1:25:37 AM (Run: 1)			119.092	47.5745	23.8446	0.399477	1664.2		0.0529431	5.40576	13.5277	2.72044	1.71238	4.24554	0.168006	3.25942	0.767728	5.95218	3.25942	0.0739222	2.72044	1.98828e-16		1042.73	54.9381	1039.32	54.9199	1013.18	27.2153	1001.11	30.223		3.67592	1.19054	0.002	0.00249924	0.00273801	0.000989133		202.79	9.3409	772.349	549782	8.83801		20.7564	0.0702712	2.01532	4.729
NLJP01 S 180 1/6/2016 12:49:13 AM (Run: 1)			39.8138	30.8155	8.6649	0.77399	326.822		0.055933	7.24493	13.5078	4.21466	1.68138	5.59955	0.164721	3.68668	0.658389	6.07086	3.68668	0.0740313	4.21466	2.25321e-16		1100.04	77.5673	1042.32	85.0452	1001.51	35.6526	982.961	33.611		5.69514	1.85164	0.002	0.00283166	0.00303637	0.00154947		208.828	15.9436	489.291	523389	1.99431		15.7815	0.104914	1.6472	3.14571
NLJP01 M 202 1/6/2016 1:37:50 AM (Run: 1)			5.83319	2.79632	1.22943	0.479381	88.6778		0.0561038	23.5304	13.5047	14.7372	1.77976	16.409	0.174319	7.21595	0.439757	5.73659	7.21595	0.0740482	14.7372	-2.62472e-16		1103.31	252.655	1042.8	297.349	1038.09	106.676	1035.87	69.0512		0.664897	0.214386	0.002	0.00618409	0.0062894	0.00545331		213.123	43.101	301.003	536127	0.778943		4.21089	0.0606778	1.55592	3.66214
NLJP01 S 150 1/5/2016 11:36:01 PM (Run: 1)			110.942	53.7418	23.9651	0.484412	12607.2		0.0597486	5.71387	13.4822	3.566	1.79361	4.91899	0.175382	3.38823	0.688806	5.70184	3.38823	0.0741721	3.566	-1.4599e-16		1172.95	65.1131	1046.15	71.9151	1043.14	32.0677	1041.7	32.5909		0.4255	0.13807	0.002	0.00271789	0.00297117	0.00130967		229.366	13.5514	793.962	552610	1.63981	0.0417078	7.50005	0.118863	1.95301	4.88293
NLJP01 M 268 1/6/2016 4:03:45 AM (Run: 1)			28.1758	25.3068	5.86943	0.898176	398.022		0.0521096	8.44783	13.4738	6.78735	1.56384	8.93557	0.152821	5.81174	0.650405	6.5436	5.81174	0.074218	6.78735	0		1026.72	84.5696	1047.41	136.853	955.991	55.3419	916.757	49.6644		12.4739	4.10401	0.002	0.00432499	0.00444078	0.00251226		199.39	9.57177	420.563	541941	0.845149		11.6823	0.0647156	2.50946	2.73346
NLJP01 S 161 1/6/2016 12:02:08 AM (Run: 1)			124.283	95.8623	25.0319	0.771325	1221.82		0.0504112	7.3326	13.4715	2.87768	1.56068	5.44533	0.152486	4.62283	0.848954	6.55799	4.62283	0.0742306	2.87768	1.32488e-16		994.067	71.1275	1047.77	58.0188	954.736	33.6987	914.883	39.4294		12.6828	4.17433	0.002	0.00336939	0.00352458	0.00105223		356.585	9.77742	1197.75	541257	4.91776	0.131603	24.2721	0.298133	4.12296	6.77044
NLJP01 S 176 1/6/2016 12:35:08 AM (Run: 1)			47.3439	50.2769	12.0252	1.06195	180.731		0.0548504	6.50295	13.4711	4.4494	1.8899	6.20353	0.184647	4.3228	0.69683	5.41574	4.3228	0.0742328	4.4494	0		1079.31	68.3458	1047.79	89.7088	1077.55	41.1932	1092.31	43.4347		-4.24943	-1.37018	0.002	0.00379528	0.00399096	0.00164135		192.747	17.8896	345.82	543766	0.910791		13.7061	0.107248	2.55979	4.45932
NLJP01 S 175 1/6/2016 12:33:25 AM (Run: 1)			97.2998	43.8755	20.7095	0.450932	1252.67		0.058192	6.96832	13.4648	2.55874	1.79311	4.98872	0.175107	4.28254	0.858445	5.71078	4.28254	0.0742678	2.55874	-1.60806e-16		1143.24	77.4532	1048.76	51.5812	1042.96	32.519	1040.19	41.1383		0.816836	0.265096	0.002	0.00355995	0.00374952	0.000932459		222.901	14.9236	562.782	550099	1.70581		8.29307	0.0180453	0.963624	2.42599
NLJP01 M 191 1/6/2016 1:15:17 AM (Run: 1)			186.073	133.715	42.5939	0.718616	4123.03		0.0522006	5.46002	13.4563	2.59225	1.82348	4.27391	0.177961	3.39802	0.795062	5.6192	3.39802	0.0743148	2.59225	-2.01886e-16		1028.47	54.75	1050.02	52.2473	1053.94	28.0267	1055.83	33.0932		-0.55351	-0.179174	0.002	0.00277663	0.00302358	0.000945892		239.586	11.4801	954.644	621852	3.98248		37.1643	0.0694804	1.59667	3.3254
NLJP01 M 200 1/6/2016 1:34:23 AM (Run: 1)			16.0323	13.8351	3.82654	0.862955	52.3318		0.066605	6.28263	13.4269	6.91521	1.76165	7.89051	0.171551	3.79999	0.48159	5.82916	3.79999	0.0744774	6.91521	2.65808e-16		1303.29	79.297	1054.42	139.285	1031.46	51.1077	1020.65	35.8702		3.20243	1.0473	0.002	0.00305748	0.00325947	0.0025687		277.679	40.5213	616.477	540999	2.39605		12.4621	0.112989	2.57765	4.66443
NLJP01 S 181 1/6/2016 12:50:57 AM (Run: 1)			91.6806	105.222	24.3331	1.1477	60007.8		0.0627933	4.30492	13.4116	2.80064	1.86553	4.03567	0.181461	2.9057	0.720004	5.51082	2.9057	0.0745621	2.80064	2.1644e-16		1230.93	51.4093	1056.72	56.3901	1068.95	26.6774	1074.95	28.7696		-1.72508	-0.561547	0.002	0.00233999	0.00263636	0.00102796		251.098	27.0737	588.263	515396	2.42213		25.5224	0.259681	3.93092	8.3573
NLJP01 M 198 1/6/2016 1:27:21 AM (Run: 1)			34.375	30.942	8.62247	0.900132	435.998		0.0590439	9.22621	13.4069	5.28698	1.9209	6.17361	0.186782	3.18768	0.516339	5.35385	3.18768	0.0745883	5.28698	0		1159.5	103.967	1057.44	106.44	1088.38	41.2247	1103.92	32.3412		-4.39554	-1.42727	0.002	0.00270945	0.00297699	0.00196329		335.817	29.7637	836.347	543292	1.61928		15.6793	0.114003	3.30559	5.90108
NLJP01 M 228 1/6/2016 2:29:51 AM (Run: 1)			176.957	158.44	41.4945	0.895362	4205.88		0.0573892	4.65076	13.3938	2.47184	1.75868	3.98616	0.17084	3.12721	0.784518	5.85343	3.12721	0.0746614	2.47184	0		1127.9	51.019	1059.41	49.7495	1030.36	25.803	1016.74	29.4149		4.02822	1.32236	0.002	0.00241771	0.00267127	0.00090469		211.534	8.95749	943.152	527377	5.22373		55.5011	0.0990046	2.8248	5.39542
NLJP01 S 141 1/5/2016 11:13:22 PM (Run: 1)			105.857	62.3881	22.7687	0.589361	888.987		0.0586858	5.48328	13.3658	3.10548	1.74469	6.14888	0.169127	5.30704	0.863091	5.91271	5.30704	0.0748177	3.10548	4.28097e-16		1152.66	61.4354	1063.59	62.4644	1025.2	39.6872	1007.3	49.4905		5.29235	1.74612	0.002	0.00433327	0.00448782	0.00114674		239.505	8.40111	1303.76	528700	1.41468		8.8057	0.255641	5.73444	12.8235
NLJP01 L 24 1/12/2016 6:07:07 PM (Run: 1)			120.247	63.3559	26.3647	0.526882	785.016		0.0600467	3.33642	13.3346	2.67667	1.79559	3.6633	0.173655	2.50104	0.675876	5.75855	2.50104	0.0749927	2.67667	-2.66683e-16		1178.63	38.1995	1068.31	53.8004	1043.86	23.8911	1032.22	23.8553		3.37843	1.11515	36.6544	0.91058	0.001	0.463634		174.83	12.8847	534.414	523032	2.84817		18.8634	0.0318912	1.03293	2.43207
NLJP01 M 257 1/6/2016 3:37:38 AM (Run: 1)			33.0568	39.2165	8.48446	1.18634	260.042		0.0508979	5.42594	13.3344	4.49269	1.91738	5.68876	0.18543	3.48965	0.61343	5.39287	3.48965	0.0749943	4.49269	-2.23133e-16		1003.43	53.1162	1068.34	90.3022	1087.16	37.9632	1096.57	35.1888		-2.64256	-0.86582	0.002	0.0029967	0.00323543	0.00167475		307.476	38.5423	747.348	599358	1.48752		14.6569	0.214966	2.66318	4.78158
NLJP01 M 245 1/6/2016 3:09:50 AM (Run: 1)			127.377	75.3182	28.9628	0.591303	1374.1		0.0606663	4.9499	13.3119	2.62069	1.855	4.2971	0.179095	3.40544	0.792498	5.58363	3.40544	0.0751207	2.62069	0		1190.44	57.224	1071.71	52.649	1065.21	28.3494	1062.03	33.3447		0.903584	0.298738	0.002	0.00280867	0.00304949	0.000967266		260.267	16.3832	758.417	503734	4.65338		22.1228	0.0319037	1.45164	3.74704
NLJP01 M 190 1/6/2016 1:13:34 AM (Run: 1)			30.1955	24.5988	6.94511	0.814653	164.964		0.0508944	8.58517	13.2791	6.3544	1.84943	8.39336	0.178116	5.48362	0.653328	5.61432	5.48362	0.0753065	6.3544	2.00736e-16		1003.36	84.0373	1076.68	127.563	1063.23	55.3153	1056.67	53.4442		1.85796	0.616179	0.002	0.00473934	0.0048836	0.00238553		241.094	26.0055	585.644	630605	1.33	0.0331556	10.6986	0.0944897	0.990315	2.76714
NLJP01 S 151 1/5/2016 11:37:44 PM (Run: 1)			48.4873	35.3307	11.0232	0.728659	381.986		0.0602258	6.38471	13.2749	3.4519	1.79613	4.85727	0.172929	3.41724	0.70353	5.78271	3.41724	0.07533	3.4519	1.48567e-16		1182.04	73.3057	1077.34	69.2878	1044.05	31.6813	1028.23	32.4781		4.55872	1.51556	0.002	0.00271093	0.0029547	0.00128671		310.54	21.8207	865.344	533934	2.23121		21.0227	0.0695189	2.62718	6.02675
NLJP01 S 143 1/5/2016 11:16:48 PM (Run: 1)			101.107	46.9282	21.0809	0.464145	499.346		0.057808	6.28359	13.2689	3.38857	1.76915	6.28354	0.170255	5.29155	0.842129	5.87355	5.29155	0.075364	3.38857	1.96603e-16		1135.9	69.4067	1078.23	68.0084	1034.21	40.7617	1013.51	49.6272		6.00177	2.00089	0.002	0.00434918	0.00450456	0.00126308		202.658	22.7268	535.468	518818	2.09812		16.0422	0.0691864	1.0989	2.70584
NLJP01 S 146 1/5/2016 11:21:58 PM (Run: 1)			98.5362	79.5241	21.0451	0.807055	610.821		0.0579468	6.91495	13.257	2.94037	1.62879	7.96817	0.156606	7.4058	0.929423	6.38544	7.4058	0.075432	2.94037	0		1138.55	76.5539	1080.04	58.9971	981.393	50.13	937.89	64.6419		13.1616	4.43281	0.002	0.00569852	0.00579898	0.00109307		187.32	6.82189	379.142	535710	3.10592	0.0596492	13.254	0.229831	2.7112	3.7798
NLJP01 M 239 1/6/2016 2:59:28 AM (Run: 1)			44.2767	44.6718	11.073	1.00892	321.017		0.053846	6.55871	13.2559	4.07313	1.92033	5.93113	0.184623	4.31136	0.726905	5.41646	4.31136	0.0754379	4.07313	-1.99468e-16		1060.05	67.7341	1080.2	81.7231	1088.18	39.6014	1092.18	43.3149		-1.1086	-0.367256	0.002	0.0037904	0.00397988	0.00152536		250.116	16.1096	727.676	617158	2.25505		13.9857	0.0525488	1.12079	3.50759
NLJP01 S 177 1/6/2016 12:36:52 AM (Run: 1)			61.1913	48.4323	12.9171	0.791489	3286.65		0.0540074	5.72606	13.2412	4.44572	1.65076	6.89624	0.15853	5.27197	0.764471	6.30797	5.27197	0.0755219	4.44572	1.49665e-16		1063.15	59.3032	1082.43	89.1691	989.844	43.607	948.601	46.5045		12.3641	4.16662	0.002	0.00404218	0.00417882	0.00166846		239.137	34.748	679.537	544394	5.24888		49.1969	0.120252	3.01079	4.66175
NLJP01 M 223 1/6/2016 2:21:13 AM (Run: 1)			75.4994	56.5477	17.4461	0.748981	361.709		0.0526576	5.25681	13.225	2.99887	1.87782	4.51892	0.180115	3.38045	0.748066	5.55202	3.38045	0.0756142	2.99887	0		1037.25	53.1507	1084.86	60.128	1073.29	29.9402	1067.6	33.2596		1.59092	0.530326	0.002	0.00280287	0.00304434	0.00111874		92.0895	5.24651	1726.54	596158	1.84988	0.0415453	8.31792	0.444656	9.46866	15.6512
NLJP01 M 271 1/6/2016 4:16:01 AM (Run: 1)			160.729	81.6536	36.3093	0.50802	1085.2		0.0644727	5.51635	13.2083	2.1826	1.87966	5.42292	0.180064	4.96431	0.915431	5.55358	4.96431	0.0757098	2.1826	-3.26964e-16		1262.85	67.5314	1087.43	43.7441	1073.94	35.9419	1067.33	48.8313		1.84854	0.616331	0.002	0.00430387	0.00446947	0.000805491		183.19	8.50757	363.289	516275	4.02759		20.9662		0.178601	1.1752
NLJP01 S 171 1/6/2016 12:26:32 AM (Run: 1)			350.825	242.388	83.3397	0.690909	6063.05		0.0619133	3.76146	13.166	1.58169	1.85307	4.25323	0.176948	3.94819	0.92828	5.65138	3.94819	0.075953	1.58169	0		1214.19	44.3265	1093.83	31.6708	1064.52	28.0497	1050.28	38.2652		3.98138	1.33801	0.002	0.00326978	0.00349312	0.000570873		110.329	8.16063	337.193	522667	0.285338		4.3406	0.0057626	0.473421	1.1702
NLJP01 M 205 1/6/2016 1:43:00 AM (Run: 1)			201.457	158.087	46.7074	0.784719	9059.83		0.055306	3.94907	13.1449	2.19438	1.83486	3.70381	0.174927	2.98378	0.805596	5.71666	2.98378	0.0760754	2.19438	1.35804e-16		1088.04	41.8313	1097.05	43.9177	1058.02	24.3417	1039.2	28.6372		5.2733	1.77873	0.002	0.0023319	0.00260972	0.000813772		242.635	7.83233	698.8	545500	3.50873		24.2648	0.117607	1.22514	3.36863
NLJP01 M 210 1/6/2016 1:55:12 AM (Run: 1)			111.713	47.1962	23.5247	0.422479	984.064		0.0563812	9.91412	13.1367	3.33538	1.83461	4.91292	0.174795	3.60722	0.734231	5.72099	3.60722	0.0761224	3.33538	1.46592e-16		1108.62	106.95	1098.31	66.74	1057.93	32.2864	1038.48	34.5985		5.4482	1.83886	0.002	0.00293159	0.00315262	0.00125584		224.275	10.7253	210	574423	0.427205		8.05201	0.0829586	1.67464	4.21779
NLJP01 M 222 1/6/2016 2:19:29 AM (Run: 1)			24.5328	18.6636	5.33237	0.760763	874.529		0.0445212	7.80725	13.1023	4.67892	1.82332	5.79814	0.173264	3.42435	0.590594	5.77154	3.42435	0.0763224	4.67892	2.18168e-16		880.413	67.2605	1103.52	93.5538	1053.88	38.0208	1030.07	32.5993		6.65559	2.25909	0.002	0.00274002	0.00296658	0.00177583		268.507	22.0115	786.214	628736	5.4371		41.943	0.133034	2.28194	6.05625
NLJP01 S 172 1/6/2016 12:28:15 AM (Run: 1)			244.673	118.98	54.6143	0.486281	1533.61		0.0617528	5.79589	13.0821	1.95554	1.87267	3.87319	0.17768	3.34326	0.863182	5.62811	3.34326	0.0764405	1.95554	-1.37216e-16		1211.14	68.1344	1106.63	39.082	1071.48	25.6374	1054.29	32.5162		4.73048	1.6044	0.002	0.00270899	0.00297015	0.000723382		251.808	7.79345	876.943	533907	1.40414	0.00945178	22.5183	0.212906	5.30257	7.38352
NLJP01 M 215 1/6/2016 2:03:49 AM (Run: 1)			49.6202	38.5551	11.6088	0.777005	462.669		0.0484329	6.95002	13.0485	2.81095	1.95326	4.37475	0.18485	3.35217	0.766253	5.4098	3.35217	0.0766374	2.81095	0		955.966	64.8931	1111.78	56.1343	1099.57	29.3793	1093.42	33.7132		1.65214	0.559698	0.002	0.002849	0.00309824	0.0010608		178.106	8.81387	2316.66	620864	1.10215	0.0346891	5.48873	0.693998	11.8253	14.8275
NLJP01 M 264 1/6/2016 3:56:50 AM (Run: 1)			57.1059	57.2194	15.7866	1.00199	354.675		0.0553324	7.87745	13.0313	2.72454	2.19828	4.72163	0.207764	3.85626	0.816721	4.81314	3.85626	0.0767381	2.72454	3.34054e-16		1088.54	83.4812	1114.4	54.3877	1180.5	32.9525	1216.9	42.7635		-9.19758	-3.08332	0.002	0.00376295	0.00400597	0.00102863		307.043	11.6748	1206.51	626111	2.29825	0.0107046	19.1295	0.105588	2.55897	5.45964
NLJP01 S 153 1/5/2016 11:41:11 PM (Run: 1)			39.383	40.1616	9.82094	1.01977	216.683		0.0606512	4.98171	12.9907	4.84558	1.87479	6.46276	0.176639	4.27642	0.661701	5.66128	4.27642	0.076978	4.84558	-1.69001e-16		1190.15	57.5781	1120.61	96.6405	1072.23	42.7952	1048.58	41.3848		6.42706	2.20478	0.002	0.0035819	0.0037769	0.00185526		283.162	19.4651	1031.2	528444	1.47205	0.0289339	12.1085	0.29729	5.78651	9.25672
NLJP01 L 19 1/12/2016 5:51:28 PM (Run: 1)			50.0289	28.7422	12.752	0.574512	934.122		0.0685531	4.98419	12.9065	3.21091	2.11668	5.09475	0.198135	3.95557	0.773287	5.04705	3.95557	0.0774805	3.21091	-1.41183e-16		1340.18	64.6305	1133.58	63.9157	1154.26	35.1331	1165.3	42.1681		-2.79748	-0.95643	36.3823	0.922728	0.001	0.460175		252.479	22.4789	706.129	524246	0.856412	0.0167473	7.64945	0.0681315	1.47845	4.00987
NLJP01 S 174 1/6/2016 12:31:42 AM (Run: 1)			95.1511	81.2759	22.5999	0.854177	619.843		0.0611338	6.55679	12.8422	4.09238	1.86152	5.89056	0.173382	4.23688	0.719265	5.7676	4.23688	0.0778685	4.09238	0		1199.35	76.3511	1143.52	81.343	1067.53	38.9096	1030.72	40.3579		9.86422	3.4478	0.002	0.00348316	0.00367299	0.00158179		3387.37	8.06996	822.651	547295	1.55427	2.11966	45.5607	1.2887	15.91	10.0972
NLJP01 M 240 1/6/2016 3:01:12 AM (Run: 1)			17.0494	39.4843	4.99783	2.31588	571.851		0.0488097	6.52705	12.8348	9.39733	1.82568	10.3269	0.169947	4.2819	0.414636	5.88418	4.2819	0.0779131	9.39733	-1.73607e-16		963.228	61.3958	1144.67	186.756	1054.73	67.7487	1011.82	40.0961		11.6056	4.06831	0.002	0.00346381	0.00363848	0.00365597		236.653	41.9495	1122.25	618633	1.0066	0.187835	40.1519	0.50105	8.82216	13.838
NLJP01 M 219 1/6/2016 2:14:19 AM (Run: 1)			196.654	142.433	44.9294	0.724284	4408.35		0.0475117	4.26029	12.7234	1.83394	1.9461	4.14818	0.179584	3.72076	0.896963	5.56842	3.72076	0.0785953	1.83394	2.60806e-16		938.198	39.0565	1161.95	36.3544	1097.1	27.8231	1064.7	36.5165		8.36952	2.95341	0.002	0.00311786	0.00334095	0.000694804		97.6746	6.08326	816.836	618529	2.02196		19.0843	0.0431702	1.28504	2.1368
NLJP01 M 208 1/6/2016 1:48:10 AM (Run: 1)			56.6625	93.7827	15.2916	1.65511	1391.92		0.0508081	5.05861	12.7001	3.61019	1.89415	4.65901	0.17447	2.94497	0.632102	5.73163	2.94497	0.0787393	3.61019	1.6492e-16		1001.7	49.4371	1165.6	71.5263	1079.04	30.9611	1036.7	28.2019		11.0594	3.92427	0.002	0.0022965	0.00256905	0.00140828		268.85	61.2464	1346.36	560865	2.08613	0.271965	21.9782	0.967287	15.5265	20.8765
NLJP01 M 244 1/6/2016 3:08:07 AM (Run: 1)			30.6216	43.181	8.7765	1.41015	8177.51		0.0597329	5.4106	12.6773	4.46956	2.07211	5.75175	0.190519	3.62016	0.629403	5.24882	3.62016	0.078881	4.46956	-2.16183e-16		1172.65	61.6418	1169.13	88.5081	1139.63	39.3918	1124.19	37.3464		3.84453	1.35507	0.002	0.00321375	0.00344855	0.00175236		310.886	43.2205	757.163	533450	1.42152		30.4813	0.164215	3.65835	5.87773
NLJP01 M 274 1/6/2016 4:21:11 AM (Run: 1)			140.089	61.572	33.5204	0.439519	1565.9		0.0568724	5.14744	12.6688	1.93294	2.16694	4.0523	0.199105	3.56159	0.878904	5.02247	3.56159	0.078934	1.93294	2.57381e-16		1118.02	55.9865	1170.48	38.269	1170.5	28.1539	1170.51	38.123		-0.00234073	-0.000920958	0.002	0.00328497	0.00354565	0.000738381		207.621	12.2495	648.785	598777	1.36751		9.61015	0.0331945	0.644426	1.8215
NLJP01 L 25 1/12/2016 6:08:50 PM (Run: 1)			251.562	189.941	65.7863	0.755047	2593.71		0.0676128	2.61038	12.6579	2.05442	2.13614	3.56946	0.196105	2.91897	0.811737	5.09932	2.91897	0.0790023	2.05442	-2.94625e-16		1322.38	33.4142	1172.19	40.6643	1160.57	24.6869	1154.36	30.8509		1.5207	0.535424	36.4349	0.920358	0.001	0.460854		167.7	8.0538	463.602	504920	4.7158		49.3955	0.0765927	1.3982	2.23378
NLJP01 S 185 1/6/2016 12:57:50 AM (Run: 1)			72.0807	33.3751	17.2191	0.463024	457.808		0.0642184	5.95869	12.6428	2.6596	2.1357	4.56085	0.195832	3.70512	0.812375	5.10643	3.70512	0.0790963	2.6596	1.78414e-16		1258.02	72.6762	1174.53	52.6248	1160.43	31.5415	1152.89	39.1141		1.84289	0.650116	0.002	0.00338457	0.0036279	0.0010338		218.381	12.2648	479.423	548113	1.21481	0.031397	8.66855	0.0357912	0.366961	1.3894
NLJP01 M 255 1/6/2016 3:34:11 AM (Run: 1)			238.001	90.6524	53.1096	0.380891	2595.8		0.0573366	6.03432	12.5483	2.10099	2.03881	4.29285	0.185551	3.74358	0.872051	5.38937	3.74358	0.0796918	2.10099	0		1126.89	66.1392	1189.37	41.4817	1128.56	29.2448	1097.23	37.7701		7.74757	2.77678	0.002	0.00324224	0.00347312	0.000814471		278.941	6.01126	1201.16	597911	3.00591		13.5095	0.0396774	0.704086	4.08629
NLJP01 S 164 1/6/2016 12:07:19 AM (Run: 1)			48.3571	67.1111	13.1725	1.38782	1256.91		0.0577819	4.92856	12.4476	3.42187	1.99759	5.56201	0.180339	4.38484	0.788355	5.5451	4.38484	0.0803369	3.42187	1.16799e-16		1135.4	54.4162	1205.26	67.406	1114.7	37.6354	1068.83	43.1872		11.32	4.11491	0.002	0.00376267	0.00395379	0.00136016		333.736	46.1639	795.852	538967	1.15334	0.0306346	63.487	0.419686	8.39429	12.7837
NLJP01 M 248 1/6/2016 3:15:00 AM (Run: 1)			53.0195	16.3463	13.8154	0.308308	567.934		0.0756992	9.81964	11.9901	3.68149	2.5482	4.85029	0.221594	3.15785	0.651063	4.51276	3.15785	0.0834018	3.68149	-3.01976e-16		1474.9	139.672	1278.65	71.761	1285.92	35.3691	1290.29	36.9267		-0.910639	-0.339611	0.002	0.00317941	0.0034988	0.00152178		226.281	4.66877	476.398	505526	3.126		4.27929	0.0365439	0.374679	0.990918
NLJP01 M 220 1/6/2016 2:16:03 AM (Run: 1)			285.228	119.751	79.1619	0.419844	2976.5		0.0607419	5.88838	11.8117	1.77821	2.66063	2.926	0.227926	2.32367	0.794145	4.38738	2.32367	0.0846621	1.77821	2.19138e-16		1191.88	68.1533	1307.8	34.5194	1317.6	21.594	1323.62	27.8044		-1.20975	-0.457192	0.002	0.002147	0.00264812	0.000723944		195.781	6.21697	1053.25	615727	8.62144		14.5866	0.0529609	0.836722	2.24055
NLJP01 M 266 1/6/2016 4:00:17 AM (Run: 1)			256.53	141.407	75.9838	0.551232	55261.3		0.0663037	4.28541	11.502	1.73267	2.81345	3.73143	0.234699	3.30476	0.885655	4.26078	3.30476	0.0869416	1.73267	-1.57876e-16		1297.58	53.8594	1359.21	33.3939	1359.13	27.9529	1359.08	40.4956		0.0100188	0.00352901	0.002	0.00353273	0.00387812	0.000723		303.297	8.383	1199.17	594970	2.03066		15.5154	0.006556	1.03412	3.4536
NLJP01 M 207 1/6/2016 1:46:27 AM (Run: 1)			113.216	42.6576	31.7163	0.37678	388.781		0.0685302	5.20186	11.4872	1.74158	2.81815	3.39189	0.23479	2.91064	0.858117	4.25913	2.91064	0.087053	1.74158	1.74589e-16		1339.74	67.4321	1361.68	33.5542	1360.38	25.4204	1359.55	35.6773		0.1565	0.0605046	0.002	0.00303765	0.00341694	0.000727674		191.644	6.96718	603.513	550781	2.91063		5.67506	0.0188405	0.536578	1.5228
NLJP01 S 158 1/5/2016 11:49:47 PM (Run: 1)			255.407	91.0595	67.6567	0.356527	2543.67		0.0746884	4.68418	11.3834	1.34398	2.60664	4.17941	0.215205	3.95742	0.946885	4.64674	3.95742	0.0878471	1.34398	-3.39919e-16		1455.9	65.7985	1379.14	25.8314	1302.51	30.6706	1256.49	45.1786		8.89359	3.53332	0.002	0.00398441	0.00425827	0.00054894		335.685	7.36074	2395.85	524942	19.1441	0.170714	16.7821	0.154769	3.04706	10.2175
NLJP01 S 157 1/5/2016 11:48:03 PM (Run: 1)			208.822	99.9709	56.0074	0.478738	9362.9		0.0755696	4.02016	11.3343	1.62666	2.56973	3.75105	0.211242	3.37999	0.901078	4.7339	3.37999	0.0882277	1.62666	4.89157e-16		1472.46	57.0906	1387.45	31.2289	1292.06	27.4179	1235.43	38		10.9564	4.38302	0.002	0.00325625	0.00356998	0.000683629		379.929	9.7777	1439.74	525860	2.80027		18.036	0.122351	2.33581	6.31932
NLJP01 M 262 1/6/2016 3:53:22 AM (Run: 1)			93.4829	43.112	27.0315	0.461175	739.501		0.0668063	5.93842	11.3285	2.89275	2.90726	3.79302	0.238867	2.45337	0.64681	4.18643	2.45337	0.0882729	2.89275	0		1307.11	75.1648	1388.41	55.5286	1383.8	28.6568	1380.8	30.4938		0.548079	0.216745	0.002	0.00246218	0.00293014	0.00125863		214.674	5.02178	1158.24	603347	5.92916		13.7698	0.0711526	2.00596	5.16445
NLJP01 M 241 1/6/2016 3:02:55 AM (Run: 1)			38.5899	44.2759	13.2078	1.14735	711.607		0.0676017	5.42898	11.2796	2.83624	3.0119	5.20727	0.246396	4.36709	0.838652	4.05851	4.36709	0.0886557	2.83624	1.41521e-16		1322.17	69.4831	1396.73	54.3808	1410.64	39.6945	1419.86	55.6529		-1.65597	-0.653923	0.002	0.00513019	0.00538016	0.00123864		179.748	11.994	650.717	621899	1.46145		6.45637	0.080789	0.892032	3.63986
NLJP01 S 184 1/6/2016 12:56:07 AM (Run: 1)			146.548	40.3423	42.1588	0.275284	8398.28		0.08413	13.673	11.1655	12.8322	2.98946	23.2651	0.242087	19.4062	0.834133	4.13075	19.4062	0.0895615	12.8322	-2.28916e-16		1632.69	214.459	1416.22	245.38	1404.94	177.016	1397.54	243.824		1.31904	0.527181	0.002	0.0234328	0.0234899	0.00574215		332.595	4.7279	713.99	518180	1.50285		4.93241	0.044898	0.959024	1.89901
NLJP01 M 193 1/6/2016 1:18:43 AM (Run: 1)			134.537	96.7668	44.0166	0.719256	1263.02		0.0709501	5.33617	10.9129	1.65728	3.19357	4.41711	0.252765	4.09443	0.926946	3.95625	4.09443	0.0916344	1.65728	-5.23968e-16		1385.46	71.4539	1459.83	31.5036	1455.61	34.1555	1452.72	53.2548		0.487151	0.198284	0.002	0.00488801	0.00517464	0.000725482		254.928	11.2568	957.52	595512	0.704075		12.047	0.0683618	1.88493	4.16251
NLJP01 M 199 1/6/2016 1:32:40 AM (Run: 1)			139.099	92.1556	43.3309	0.662519	1305.85		0.0753128	6.59371	10.907	2.27408	3.03041	4.66809	0.23972	4.07672	0.873316	4.17153	4.07672	0.0916844	2.27408	1.91547e-16		1467.64	93.3419	1460.86	43.2227	1415.31	35.6387	1385.24	50.8171		5.17618	2.12443	0.002	0.00461506	0.00488636	0.00101814		383.357	9.14663	1193.57	544031	2.97961	0.065315	11.7744	0.0536879	1.48436	3.28078
NLJP01 S 152 1/5/2016 11:39:27 PM (Run: 1)			166.097	46.0212	46.2208	0.277074	3024.53		0.0772149	5.25126	10.8334	1.90387	2.97438	4.60034	0.2337	4.18788	0.910343	4.27899	4.18788	0.0923072	1.90387	-2.24195e-16		1503.36	76.0807	1473.7	36.1239	1401.09	34.958	1353.86	51.1402		8.13177	3.37105	0.002	0.00461798	0.00489355	0.000848473		631.204	10.551	1572.01	534894	0.912511		1.64511	0.0628773	1.50273	4.64992
NLJP01 S 168 1/6/2016 12:14:12 AM (Run: 1)			205.854	142.03	71.0314	0.689957	4638.26		0.084715	4.2484	10.618	1.83668	3.34955	4.40648	0.257945	4.00546	0.908993	3.87679	4.00546	0.0941799	1.83668	2.45198e-16		1643.6	67.0629	1511.71	34.6719	1492.69	34.4559	1479.32	52.9464		2.14284	0.895493	0.002	0.00484802	0.00516594	0.00083318		277.13	5.69983	1958.34	527201	2.74643	0.0105182	13.4952	0.299277	5.67388	9.36361
NLJP01 S 155 1/5/2016 11:44:37 PM (Run: 1)			145.665	82.074	47.0526	0.563443	11306.2		0.0848053	4.33271	10.4367	2.01538	3.30426	4.77256	0.250113	4.32616	0.906464	3.99819	4.32616	0.0958156	2.01538	-4.09197e-16		1645.28	68.461	1544.17	37.8815	1482.06	37.2012	1439.06	55.7966		6.8068	2.90131	0.002	0.00512744	0.00541014	0.000935982		275.022	6.07957	957.666	532372	2.1082		13.5235	0.0062998	1.33768	3.67929
NLJP01 M 235 1/6/2016 2:45:30 AM (Run: 1)			103.776	107.735	45.4824	1.03814	1068.13		0.094771	5.5338	9.98329	1.85663	4.27188	4.96348	0.309309	4.60316	0.927405	3.23302	4.60316	0.100167	1.85663	-4.15204e-16		1830.11	96.8251	1627.19	34.5215	1687.96	40.8385	1737.3	70.101		-6.76682	-2.92324	0.002	0.00681469	0.00711898	0.000897395		177.428	10.0246	665.393	568907	0.936484		14.9581	0.261463	2.78052	5.18797
NLJP01 M 192 1/6/2016 1:17:00 AM (Run: 1)			58.2149	28.2185	21.618	0.48473	19505.5		0.0850165	6.55172	9.45478	2.62932	4.39089	4.27136	0.301094	3.36619	0.788084	3.32122	3.36619	0.105767	2.62932	-1.99011e-16		1649.21	103.761	1727.67	48.2674	1710.63	35.3255	1696.73	50.217		1.79092	0.812163	0.002	0.00465419	0.00506771	0.00136618		135.488	8.82444	367.611	607619	2.17772		5.80215	0.0182911	0.875164	2.00298
NLJP01 M 212 1/6/2016 1:58:39 AM (Run: 1)			287.688	66.0619	95.7161	0.229631	2045.79		0.0778821	4.95454	9.32299	1.4358	4.07689	4.3358	0.275666	4.09116	0.943578	3.62758	4.09116	0.107262	1.4358	3.11905e-16		1515.87	72.3572	1753.4	26.273	1649.69	35.3533	1569.5	56.9917		10.4882	4.86114	0.002	0.00530952	0.00563898	0.000724263		146.331	7.63224	720.46	609983	1.68626		6.06584	0.0295365	0.888309	2.26923
NLJP01 L 20 1/12/2016 5:53:11 PM (Run: 1)			109.893	89.3201	47.7106	0.812788	25884.2		0.101963	2.4319	9.20031	2.44189	4.75161	3.51467	0.317061	2.52786	0.712167	3.15397	2.52786	0.108692	2.44189	1.43787e-16		1962.46	45.4815	1777.61	44.5488	1776.39	29.4826	1775.36	39.2291		0.126404	0.0582029	35.1914	0.978106	0.001	0.443498		218.881	11.0558	440.18	531994	2.15726		18.534	0.0763169	1.52584	3.26099
NLJP01 M 226 1/6/2016 2:26:24 AM (Run: 1)			171.112	172.931	74.5133	1.01063	1282.81		0.0972477	4.77167	9.13654	1.35792	4.53351	4.32317	0.300411	4.10437	0.949389	3.32878	4.10437	0.109451	1.35792	3.22441e-16		1875.79	85.4787	1790.29	24.7346	1737.14	35.9638	1693.34	61.1222		5.41485	2.52115	0.002	0.0058224	0.00616498	0.000693732		172.633	5.48328	578.639	527128	4.12549		23.6546		0.602708	2.24753
NLJP01 M 251 1/6/2016 3:27:15 AM (Run: 1)			61.256	126.691	36.2125	2.06822	1437.25		0.109152	3.90147	9.02309	2.63683	5.06263	3.84848	0.331307	2.8032	0.728392	3.01835	2.8032	0.110827	2.63683	-1.1931e-16		2093.89	77.6036	1813	47.8963	1829.87	32.6313	1844.71	44.9701		-1.74907	-0.811282	0.002	0.00409169	0.00464359	0.00143614		323.098	13.1001	649.657	514210	3.08574		19.201	0.0781697	0.987994	2.74361
NLJP01 S 170 1/6/2016 12:24:48 AM (Run: 1)			267.913	105.092	101.366	0.392261	14321.6		0.1001	4.44379	8.93503	1.60531	4.54412	4.02152	0.294472	3.68723	0.916873	3.39591	3.68723	0.111919	1.60531	3.10792e-16		1928.26	81.7273	1830.81	29.0958	1739.08	33.4686	1663.84	54.0716		9.1202	4.32677	0.002	0.00501825	0.00542893	0.000855072		188.406	8.22025	682.203	517865	1.45053		9.36999	0.00630956	0.925635	4.45544
NLJP01 M 230 1/6/2016 2:36:54 AM (Run: 1)			72.8426	59.213	31.4631	0.812889	1533.41		0.102614	4.84984	8.91644	2.94688	4.87155	3.88678	0.315034	2.53436	0.652045	3.17426	2.53436	0.112152	2.94688	-2.36595e-16		1974.39	91.2267	1834.57	53.3873	1797.35	32.7442	1765.43	39.1387		3.76894	1.77581	0.002	0.00340192	0.00399204	0.00162982		178.246	8.79635	146.983	536319	0.450973		7.15029	0.0366589	0.751714	2.19835
NLJP01 M 267 1/6/2016 4:02:01 AM (Run: 1)			73.1289	33.2946	26.9899	0.455286	1010.48		0.0881217	6.31229	8.90006	2.01747	4.60755	4.17381	0.297414	3.65384	0.87542	3.36231	3.65384	0.112359	2.01747	-2.39608e-16		1706.98	103.325	1837.9	36.5348	1750.64	34.8225	1678.47	53.9947		8.67451	4.12204	0.002	0.0050595	0.00543352	0.00110006		152.475	4.44886	461.254	582902	1.37636		19.6242	0.0126348	0.718615	1.69288
NLJP01 M 194 1/6/2016 1:20:27 AM (Run: 1)			234.512	258.586	104.969	1.10265	5165.04		0.0877501	3.58442	8.58743	1.44284	4.91445	3.45534	0.306081	3.13968	0.908646	3.26711	3.13968	0.116449	1.44284	6.03892e-16		1700.07	58.4454	1902.42	25.9262	1804.74	29.1528	1721.39	47.4318		9.51567	4.61819	0.002	0.0043173	0.00480498	0.000790339		252.486	12.0404	1269.29	590336	3.25843		14.5319	0.142815	3.08965	8.18077
NLJP01 S 167 1/6/2016 12:12:29 AM (Run: 1)			106.558	69.8883	63.9305	0.655873	27046.3		0.138599	5.5179	5.57387	1.66974	10.5579	4.83203	0.426808	4.53436	0.938398	2.34297	4.53436	0.179409	1.66974	2.37266e-16		2623.5	135.761	2647.42	27.7059	2485.02	44.8185	2291.31	87.4382		13.4511	7.79489	0.002	0.00921856	0.00967651	0.00143108		110.746	9.39184	376.623	525139	1.79622		18.8892	0.0380209	0.407781	1.31377
NLJP01 M 238 1/6/2016 2:50:40 AM (Run: 1)			66.2033	33.8564	37.578	0.5114	1194.88		0.114722	5.57283	5.51242	1.65011	10.7998	2.95747	0.431776	2.45433	0.829876	2.31602	2.45433	0.181409	1.65011	0		2195.15	115.923	2665.79	27.3327	2506.05	27.4847	2313.72	47.7128		13.2071	7.67485	0.002	0.00445319	0.00529861	0.00143025		99.661	8.61922	459.528	603593	0.801517	0.0872543	9.13431	0.0621663	0.163431	0.534882
NLJP01 M 270 1/6/2016 4:14:17 AM (Run: 1)			23.9285	16.4985	14.8287	0.689494	312.829		0.142954	7.67013	5.40992	3.54649	11.3583	6.91547	0.44566	5.93685	0.858488	2.24386	5.93685	0.184846	3.54649	0		2700.68	193.903	2696.83	58.5731	2553.01	64.5366	2375.93	117.981		11.8994	6.9361	0.002	0.0128955	0.0132291	0.00324686		145.766	6.77225	216.024	532741	0.515921		11.6437		0.229694	0.842366
NLJP01 M 261 1/6/2016 3:51:38 AM (Run: 1)			165.713	108.394	101.471	0.654104	1548.75		0.120053	4.89699	5.20531	1.17137	11.5886	3.10404	0.437498	2.87453	0.926063	2.28572	2.87453	0.192112	1.17137	5.39955e-16		2291.57	106.09	2760.32	19.2326	2571.75	29.0142	2339.43	56.3968		15.2477	9.03361	0.002	0.00552856	0.00628802	0.00102387		170.644	4.72557	688.861	608664	2.58238		10.8603		0.223172	1.59853
DISCORDANT ANALYSES
NLJP01 S 140 1/5/2016 11:11:39 PM (Run: 1)			234.071	31.4468	19.1657	0.134348	315.775		0.0470904	18.9699	15.0781	5.08075	0.652766	6.80251	0.0713844	4.52329	0.664944	14.0087	4.52329	0.0663212	5.08075	-3.06882e-16		930.067	172.435	816.509	106.177	510.179	27.28	444.491	19.4281		45.562	12.8755	0.002	0.00153736	0.00161446	0.00167671		216.127	95.0324	565.13	523946	4.54356	0.156757	5.61877	0.106101	0.572542	0.786225
NLJP01 S 169 1/6/2016 12:23:05 AM (Run: 1)			36.8517	17.8181	5.59422	0.483509	657.107		0.0623013	12.1055	11.0657	10.1302	1.41333	14.3241	0.113428	10.127	0.706995	8.81617	10.127	0.0903692	10.1302	-1.36284e-16		1221.57	143.497	1433.35	193.261	894.558	85.177	692.625	66.5057		51.678	22.5735	0.002	0.00569317	0.00574345	0.0045719		344.576	232.969	600.677	462359	2.5572	1.93754	19.9169	0.919499	4.75966	6.06286
NLJP01 M 243 1/6/2016 3:06:22 AM (Run: 1)			68.9826	82.4719	17.0791	1.19555	3966.8		0.0458288	6.91809	13.9339	4.83915	1.80107	5.65049	0.182014	2.9173	0.516293	5.4941	2.9173	0.0717672	4.83915	0		905.7	61.274	979.334	98.5864	1045.85	36.8912	1077.97	28.9588		-10.0713	-3.0711	0.002	0.00236862	0.00265494	0.00172768		223.73	13.6199	866.601	620216	6.73696	0.0961009	49.9957	0.15191	2.24641	4.35682
NLJP01 S 139 1/5/2016 11:09:55 PM (Run: 1)			86.595	83.605	17.5507	0.965471	338.48		0.0542069	4.75218	13.1024	3.44504	1.48557	5.91291	0.14117	4.80564	0.812737	7.08365	4.80564	0.0763217	3.44504	4.24654e-16		1066.97	49.3894	1103.5	68.883	924.507	35.8838	851.276	38.3232		22.8566	7.92113	0.002	0.00324966	0.00339206	0.00130088		180.835	15.3464	407.477	519883	4.55081	0.126874	40.6463	0.12238	2.15704	3.17108
NLJP01 M 254 1/6/2016 3:32:28 AM (Run: 1)			44.4011	62.9705	10.1177	1.41822	13322.8		0.0515951	10.263	12.5109	5.68861	1.60289	6.45218	0.145443	3.04472	0.471891	6.87555	3.04472	0.0799302	5.68861	0		1016.84	101.776	1195.26	112.22	971.339	40.3445	875.367	24.9221		26.7636	9.88039	0.002	0.0019969	0.00221417	0.00226515		252.433	22.88	933.136	606246	2.43776	0.134796	29.6694	0.399519	6.21433	9.47913
NLJP01 L 21 1/12/2016 6:01:58 PM (Run: 1)			94.5446	61.3682	55.1036	0.649093	879.145		0.132434	2.9826	5.50307	1.38827	10.5645	3.01483	0.42165	2.67617	0.879889	2.37163	2.67617	0.181717	1.38827	2.3839e-16		2513.77	70.501	2668.61	22.9893	2485.59	27.965	2267.97	51.1672		15.0131	8.75562	34.2045	1.02356	0.001	0.42769		170.414	12.6901	369.718	521948	0.886523		12.4118	0.0397256	1.29498	1.74322
NLJP01 S 179 1/6/2016 12:47:30 AM (Run: 1)			345.852	84.4059	65.7822	0.244052	1398.69		0.0609434	5.45767	12.9378	1.72879	1.70482	3.78948	0.159969	3.37216	0.889874	6.2512	3.37216	0.0772931	1.72879	1.55001e-16		1195.72	63.3657	1128.77	34.4372	1010.34	24.2521	956.606	29.9789		15.2524	5.31863	0.002	0.00246301	0.00269721	0.000640629		149.621	7.96436	302.36	514421	3.00811	0.107395	9.97562	0.0810237	0.684661	0.894502
NLJP01 S 144 1/5/2016 11:18:32 PM (Run: 1)			17.4792	10.4531	3.42535	0.59803	1905.39		0.0599463	11.3586	13.2501	7.67921	1.57586	10.434	0.151438	7.06379	0.677	6.60335	7.06379	0.0754713	7.67921	-1.28777e-16		1176.71	129.842	1081.08	154.056	960.74	64.8149	909.02	59.8895		15.9155	5.38331	0.002	0.00524795	0.00534864	0.00289173		264.803	36.2934	489.563	524533	2.07775		11.6028	0.0926645	1.97932	2.94454
Jan 5th, 2016, Experiment 2
Isotope ratio and date errors include systematic calibration errors of 0.49% (207Pb/206Pb) and 1.35% (206Pb/238U) (all 2-sigma).
Trace element concentrations were deleted from analyses known to have intersected inclusions of other minerals based on P and Ti.
Ablation used a laser spot size of 25 microns, and a laser firing repetition rate of 10 Hz.
Activity of TiO2 for Ti-in-Zircon temperature calculation is 0.8.
Jan 12th, 2016 Experiment 1
Isotope ratio and date errors include systematic calibration errors of 0.36% (207Pb/206Pb) and 1.01% (206Pb/238U) (all 2-sigma).
Trace element concentrations were deleted from analyses known to have intersected inclusions of other minerals based on P and Ti.
Ablation used a laser spot size of 25 microns, and a laser firing repetition rate of 10 Hz.
Activity of TiO2 for Ti-in-Zircon temperature calculation is 0.8.
NLJP02 Paragneiss, North Lake (48.49568° N, 57.87792° W)
NLJP02 S 3 1/1/2018 9:23:58 PM (Run: 1)			1104.75	281.888	91.4718	0.255161	2663.66		0.024021	6.85299	17.5523	1.20724	0.518827	5.4468	0.0660472	5.31133	0.973426	15.1407	5.31133	0.0569727	1.20724	3.04255e-16		479.776	32.4919	490.498	26.6279	424.368	18.8923	412.297	21.2129		15.9431	2.84431	37.7932	0.864011	0.001	0.476762		1555.35	7.66546	4161.32	372253	14.8145		19.4292	0.0640527	2.61256	8.68654
NLJP02 S 15 1/1/2018 9:51:18 PM (Run: 1)			815.371	322.242	66.9911	0.395209	2117.98		0.0206674	7.59038	16.4637	1.81679	0.557945	4.30465	0.0666219	3.90247	0.903661	15.0101	3.90247	0.0607398	1.81679	0		413.474	31.0654	630.012	39.1387	450.188	15.6534	415.771	15.7132		34.0058	7.64491	37.8254	0.862821	0.001	0.477103		1556.46	6.29267	4778.45	443378	4.96399	0.0735175	12.7319	0.182185	3.75574	8.66615
NLJP02 S 16 1/1/2018 9:52:59 PM (Run: 1)			928.913	315.01	80.0232	0.339117	3067.2		0.023279	10.6575	16.5831	2.03208	0.575919	6.09188	0.0692669	5.74297	0.941328	14.4369	5.74297	0.0603023	2.03208	3.24361e-16		465.126	49.0047	614.44	43.8899	461.835	22.6052	431.738	23.9825		29.7348	6.51697	37.7785	0.864554	0.001	0.476606		1560.08	7.79755	4828.39	439862	9.91703	0.0473895	16.3845	0.125442	3.4193	9.55608
NLJP02 S 4 1/1/2018 9:25:39 PM (Run: 1)			677.405	194.738	56.5062	0.287477	3179.01		0.0247162	5.82697	17.9175	0.891217	0.536438	5.19449	0.0697102	5.11747	0.983321	14.3451	5.11747	0.0558113	0.891217	0		493.494	28.4076	444.866	19.8131	436.073	18.4152	434.41	21.4983		2.35054	0.381525	37.7962	0.863899	0.001	0.476794		1583.07	4.72707	3363.19	363483	2.25258		7.83983	0.150055	2.17294	7.63577
NLJP02 S 2 1/1/2018 9:22:16 PM (Run: 1)		z2	505.096	109.961	41.0602	0.217703	1822.9		0.0254631	4.52842	17.4138	2.49946	0.561463	6.54638	0.070911	6.05044	0.922998	14.1022	6.05044	0.0574257	2.49946	-4.74642e-16		508.22	22.7274	507.911	54.9664	452.478	23.9012	441.642	25.8265		13.0473	2.39485	37.8036	0.863624	0.001	0.476872		1154.53	5.68103	2317.57	379166	3.1685	0.198968	6.60931	0.104332	1.34001	3.78743
NLJP02 S 23 1/1/2018 10:11:54 PM (Run: 1)			805.26	256.491	68.6668	0.318519	3407.53		0.0195704	5.4991	17.7909	1.85098	0.549934	5.64701	0.0709591	5.33503	0.943138	14.0926	5.33503	0.0562084	1.85098	0		391.738	21.3346	460.621	41.0377	444.954	20.3444	441.931	22.7872		4.05741	0.679232	37.7666	0.864998	0.001	0.47648		1566.69	6.17271	4654.17	446103	7.02925		13.9294	0.132152	2.99751	9.83127
NLJP02 S 12 1/1/2018 9:46:15 PM (Run: 1)		z1	366.703	172.119	30.9057	0.469367	9388.92		0.0208386	8.41507	17.0545	2.61187	0.574967	5.01201	0.0711181	4.27766	0.851198	14.0611	4.27766	0.0586356	2.61187	-1.57324e-16		416.864	34.7201	553.594	56.9932	461.222	18.5786	442.888	18.3091		19.9977	3.97498	37.8183	0.863084	0.001	0.477027		1302.6	8.10805	3756.14	443728	4.34849		10.9327	0.190972	4.36614	10.3127
NLJP02 S 249 1/13/2016 3:19:08 AM (Run: 1)			793.977	292.73	66.2937	0.368688	1489.83		0.021181	5.41022	17.5754	2.48476	0.56185	6.18102	0.0716183	5.65959	0.915641	13.9629	5.65959	0.0568978	2.48476	-2.52611e-16		423.642	22.6814	487.554	54.8345	452.73	22.5773	445.898	24.383		8.54398	1.5091	0.002	0.00199829	0.00202665	0.000690842		974.849	9.35575	4973.82	647426	6.94886	0.103387	12.9809	0.136772	2.70211	9.29222
NLJP02 S 248 1/13/2016 3:13:39 AM (Run: 1)			559.372	210.654	46.7256	0.376591	3550.55		0.0202443	4.74885	17.3061	2.17593	0.57155	3.38175	0.0717385	2.58873	0.765501	13.9395	2.58873	0.0577831	2.17593	0		405.094	19.0458	521.519	47.7408	459.016	12.4881	446.621	11.1704		14.3615	2.7004	0.002	0.000864719	0.000928558	0.000609976		663.484	6.08211	3688.29	658035	3.48173		10.8297	0.073688	2.13437	6.74484
NLJP02 S 250 1/13/2016 3:20:51 AM (Run: 1)		z1	392.444	199.657	34.1956	0.508751	2176.71		0.0209712	6.07853	17.7059	2.97324	0.563078	4.47712	0.0723077	3.3473	0.747646	13.8298	3.3473	0.0564784	2.97324	1.7866e-16		419.489	25.236	471.223	65.7987	453.528	16.3763	450.044	14.5505		4.49444	0.768124	0.002	0.00116098	0.00121018	0.000826359		829.956	9.37297	4520.96	646828	4.98222		11.8118	0.200279	3.75364	11.851
NLJP02 S 262 1/13/2016 3:45:17 AM (Run: 1)			150.285	279.594	17.1713	1.86043	4624.3		0.019964	4.53585	17.7815	4.33961	0.565067	5.7615	0.0728732	3.78981	0.657782	13.7225	3.78981	0.0562381	4.33961	-2.16427e-16		399.541	17.9446	461.76	96.1949	454.819	21.1219	453.442	16.5942		1.80119	0.302663	0.002	0.00133692	0.00138088	0.00121128		351.154	23.1263	2659.32	666710	3.798	0.107539	8.71696	0.649395	9.93757	20.1892
NLJP02 S 265 1/13/2016 3:50:26 AM (Run: 1)			240.869	60.0135	19.9074	0.249154	1421.04		0.0215052	8.73209	18.1616	2.94486	0.555292	4.63352	0.0731432	3.57733	0.772056	13.6718	3.57733	0.0550613	2.94486	0		430.058	37.1564	414.704	65.8133	448.457	16.7977	455.064	15.7179		-9.7324	-1.47331	0.002	0.00126142	0.00130829	0.000797735		367.02	5.31715	1621.67	652489	2.31609		4.94623		0.423853	2.0425
NLJP02 S 6 1/1/2018 9:29:01 PM (Run: 1)			408.13	110.482	34.1647	0.270704	831.003		0.0238666	6.69274	17.6326	2.56639	0.573029	5.65659	0.0732808	5.0409	0.889431	13.6461	5.0409	0.0567133	2.56639	2.73954e-16		476.728	31.5328	480.419	56.7046	459.971	20.923	455.891	22.1872		5.10543	0.887017	37.7866	0.864254	0.001	0.476692		800.041	5.14166	1989.04	368292	2.5313		8.98012	0.0517464	1.00734	3.75247
NLJP02 S 22 1/1/2018 10:10:13 PM (Run: 1)			548.633	169.31	46.981	0.308603	1278.93		0.0210557	5.98814	17.7641	1.56436	0.572778	6.05788	0.0737953	5.85241	0.964709	13.551	5.85241	0.0562932	1.56436	3.93954e-16		421.163	24.9589	463.963	34.6629	459.809	22.4011	458.981	25.9274		1.0739	0.180223	37.7656	0.865034	0.001	0.476469		1322.61	6.13974	3526.99	450997	3.08626		9.04974	0.0274989	1.77065	6.34075
NLJP02 S 5 1/1/2018 9:27:20 PM (Run: 1)			423.055	121.197	35.9129	0.286481	1267.07		0.024362	7.04228	17.6129	2.0175	0.578388	4.64285	0.0738839	4.1816	0.89812	13.5348	4.1816	0.0567764	2.0175	-2.10104e-16		486.506	33.8521	482.877	44.5579	463.425	17.2751	459.512	18.5461		4.83862	0.844224	37.7794	0.864521	0.001	0.476616		799.867	4.69484	1967.51	368230	2.8059		9.82684	0.00543178	1.51056	4.44349
NLJP02 S 1 1/1/2018 9:20:35 PM (Run: 1)		z2	459.611	109.395	38.9294	0.238016	919.667		0.0255667	9.12884	17.0226	2.05904	0.598794	7.02869	0.0739269	6.72033	0.955085	13.5269	6.72033	0.0587453	2.05904	-5.1576e-16		510.263	45.9981	557.64	44.8999	476.468	26.7294	459.771	29.822		17.5505	3.50435	37.7733	0.864748	0.001	0.476551		1056.14	6.65749	2324.75	365567	3.1852	0.782342	6.78627	0.110874	1.1924	4.66078
NLJP02 S 267 1/13/2016 3:53:52 AM (Run: 1)			314.371	74.8267	26.1929	0.23802	2387.51		0.0212264	9.13219	17.6648	3.13566	0.577411	5.61105	0.0739764	4.65311	0.829277	13.5178	4.65311	0.0566096	3.13566	-1.21905e-16		424.541	38.3656	476.369	69.3312	462.796	20.8552	460.068	20.6614		3.42201	0.589522	0.002	0.00168491	0.0017211	0.000875007		1185.47	8.7531	5902.92	664847	4.96132		3.5799	0.0275999	0.627631	5.23884
NLJP02 S 7 1/1/2018 9:30:43 PM (Run: 1)			279.262	57.1333	22.7417	0.204587	652333		0.0234446	7.25981	17.4748	2.2173	0.583731	5.78247	0.0739816	5.34046	0.92197	13.5169	5.34046	0.0572253	2.2173	0		468.396	33.6137	500.215	48.8256	466.856	21.6409	460.099	23.715		8.01967	1.44742	37.7937	0.863991	0.001	0.476768		509.707	4.43001	1170.64	386656	2.52921		5.62463		0.370653	1.17519
NLJP02 S 13 1/1/2018 9:47:56 PM (Run: 1)		z1	349.752	166.006	30.4088	0.474638	5494.63		0.0200994	6.36615	17.4187	1.98585	0.586316	4.96498	0.0740706	4.55054	0.914362	13.5006	4.55054	0.0574096	1.98585	0		402.224	25.3531	507.284	43.6763	468.512	18.6333	460.633	20.2299		9.19618	1.68165	37.7855	0.864296	0.001	0.47668		1170.51	7.31832	3773.84	445030	3.49204		10.9236	0.194169	3.83891	11.1323
NLJP02 S 14 1/1/2018 9:49:37 PM (Run: 1)		z1	390.616	177.645	34.3132	0.454783	3785.1		0.0213869	8.0397	16.7917	3.02262	0.609252	5.32149	0.0741979	4.37973	0.820929	13.4775	4.37973	0.0595531	3.02262	-1.33332e-16		427.717	34.0259	587.393	65.5802	483.088	20.4567	461.397	19.5017		21.45	4.4901	37.7794	0.864522	0.001	0.476616		1427.77	8.57019	4167.99	456927	6.65543		11.3927	0.125778	2.70386	9.0822
NLJP02 S 260 1/13/2016 3:41:49 AM (Run: 1)			1079.69	344.902	94.4098	0.319445	5276.47		0.0278222	4.15834	17.1648	1.43204	0.597554	3.89083	0.07439	3.61771	0.929804	13.4427	3.61771	0.0582588	1.43204	0		554.665	22.7512	539.493	31.3234	475.68	14.7773	462.55	16.1475		14.2622	2.76038	0.002	0.00129896	0.00134561	0.000388028		1022.79	9.48777	4825.08	553134	11.7361	0.00903275	17.8605	0.157668	3.68731	9.50398
NLJP02 S 8 1/1/2018 9:32:24 PM (Run: 1)			290.073	63.5217	23.7985	0.218986	1980.56		0.0219648	7.77276	17.7743	2.7081	0.578034	4.79442	0.0745151	3.95635	0.822608	13.4201	3.95635	0.056261	2.7081	0		439.15	33.766	462.69	60.0194	463.197	17.8321	463.301	17.6866		-0.131954	-0.0222999	37.7864	0.864261	0.001	0.47669		535.245	4.37045	1251.47	382530	2.67915		5.77245	0.0119939	0.351224	1.57267
NLJP02 S 17 1/1/2018 9:54:41 PM (Run: 1)			432.137	129.224	36.5367	0.299034	993.3		0.0199756	6.34884	17.8497	1.73804	0.575848	4.68531	0.0745481	4.35101	0.926254	13.4142	4.35101	0.0560235	1.73804	2.34453e-16		399.771	25.1315	453.315	38.5824	461.79	17.3845	463.498	19.4589		-2.24641	-0.370031	37.7715	0.864814	0.001	0.476532		977.384	4.63435	2538	455883	2.79948		7.44272		1.72824	3.97997
NLJP02 S 18 1/1/2018 9:56:22 PM (Run: 1)			500.064	172.562	43.2167	0.345081	2858.44		0.0198056	6.55052	17.8556	1.6093	0.577447	5.08532	0.0747801	4.82397	0.946615	13.3725	4.82397	0.0560048	1.6093	-4.61226e-16		396.401	25.7134	452.555	35.7294	462.82	18.9019	464.89	21.6366		-2.7257	-0.447328	37.7604	0.865228	0.001	0.476414		939.866	4.79872	2915.76	454504	3.22294		9.7751	0.058882	1.66751	6.0428
NLJP02 S 261 1/13/2016 3:43:32 AM (Run: 1)		z2	438.517	104.128	37.4734	0.237455	982.694		0.02663	7.29153	17.6308	2.63044	0.585243	5.7313	0.0748355	5.09201	0.888457	13.3626	5.09201	0.0567189	2.63044	0		531.207	38.2286	480.598	58.119	467.825	21.4844	465.222	22.8546		3.19921	0.556425	0.002	0.00187206	0.00190532	0.000730936		597.925	5.7476	2260.73	548659	3.3584		6.78222	0.0303304	0.819787	3.65608
NLJP02 S 10 1/1/2018 9:35:47 PM (Run: 1)			406.48	92.4928	34.0823	0.227546	14440.8		0.022156	6.51275	17.8908	2.22852	0.577722	4.79306	0.0749632	4.24348	0.882926	13.3399	4.24348	0.0558946	2.22852	1.87017e-16		442.931	28.5332	448.174	49.515	462.997	17.821	465.988	19.0763		-3.9749	-0.646175	37.7689	0.864912	0.001	0.476504		1135.17	4.53657	2335	399772	2.44761		6.46832	0.062045	0.676971	3.93787
NLJP02 S 9 1/1/2018 9:34:05 PM (Run: 1)			402.706	105.352	34.2472	0.261611	2949.03		0.023892	4.63743	17.8526	2.34601	0.579004	5.63223	0.0749688	5.12038	0.907418	13.3389	5.12038	0.0560144	2.34601	2.94348e-16		477.229	21.8719	452.965	52.0814	463.821	20.9705	466.022	23.02		-2.88268	-0.474545	37.7692	0.864903	0.001	0.476507		753.081	4.35974	1842.81	387806	2.75628		8.4098	0.0766097	0.728629	2.62234
NLJP02 S 11 1/1/2018 9:44:33 PM (Run: 1)			460.643	118.331	39.775	0.256882	13715.9		0.0235628	7.34127	16.9922	2.35608	0.614289	4.54454	0.0757045	3.88609	0.85234	13.2093	3.88609	0.0588504	2.35608	-1.94335e-16		470.731	34.1583	561.578	51.342	486.261	17.5595	470.432	17.6303		16.2303	3.25527	37.7551	0.865428	0.001	0.476357		1230.39	6.80562	2715.06	421095	2.85616	0.11742	7.75449	0.183174	2.85094	4.65408
NLJP02 S 20 1/1/2018 9:59:44 PM (Run: 1)			248.67	57.3959	20.5997	0.230811	753.564		0.0184516	8.91239	17.1338	2.8042	0.61001	8.65215	0.0758034	8.18512	0.945332	13.192	8.18512	0.0583643	2.8042	0		369.548	32.6363	543.476	61.2948	483.567	33.2861	471.025	37.1791		13.3311	2.59364	37.7734	0.864746	0.001	0.476552		642.797	4.76102	1471.81	471880	2.51829	0.0159604	4.81947	0.0167382	0.576037	1.73794
NLJP02 S 259 1/13/2016 3:40:06 AM (Run: 1)			391.48	100.613	34.3972	0.257007	1354.03		0.0263968	6.25309	17.4936	2.78798	0.604037	4.71463	0.0766374	3.80196	0.806418	13.0485	3.80196	0.0571639	2.78798	0		526.616	32.5045	497.839	61.4175	479.793	18.0271	476.02	17.446		4.38264	0.786263	0.002	0.00141096	0.00145686	0.000782564		601.561	4.79201	2183.16	549747	2.61669		7.19536	0.0185297	1.38914	4.32327
NLJP02 M 211 1/13/2016 1:51:51 AM (Run: 1)			296.559	93.8648	26.616	0.316513	1058.58		0.0273796	4.94522	17.7191	3.5163	0.596462	4.78943	0.076652	3.2518	0.678955	13.046	3.2518	0.0564362	3.5163	1.55555e-16		545.96	26.6376	469.603	77.8374	474.986	18.1693	476.108	14.9242		-1.38525	-0.236241	0.002	0.00119357	0.00124629	0.00098099		789.726	8.59608	2681.17	537142	2.7571		5.73121	0.0599468	1.21521	6.36063
NLJP02 S 233 1/13/2016 2:44:06 AM (Run: 1)			292.592	69.7578	25.6305	0.238413	1665.62		0.026005	6.98794	18.0647	2.31739	0.587939	3.15086	0.0770305	2.13486	0.677549	12.9819	2.13486	0.0553565	2.31739	1.79756e-16		518.898	35.7988	426.624	51.683	469.551	11.8456	478.374	9.84289		-12.13	-1.87905	0.002	0.000738088	0.000822247	0.000624589		361.542	4.22055	1433.13	580682	2.63982		5.90167	0.0262539	0.487853	2.4698
NLJP02 S 253 1/13/2016 3:26:00 AM (Run: 1)			394.421	100.297	34.6758	0.25429	1177.96		0.0244426	7.95273	17.4144	2.92653	0.611171	5.71992	0.0771917	4.91456	0.859201	12.9548	4.91456	0.0574237	2.92653	-2.47244e-16		488.096	38.352	507.84	64.3588	484.298	22.0314	479.339	22.7029		5.61225	1.02414	0.002	0.0018614	0.00189682	0.000826568		619.375	5.6948	2620.8	621725	3.17452		5.974	0.0438696	1.09941	3.56591
NLJP02 S 268 1/13/2016 3:55:35 AM (Run: 1)			727.21	239.442	64.8596	0.329262	4473.75		0.0227696	5.01369	18.0108	1.90493	0.592693	4.95502	0.0774215	4.57422	0.923148	12.9163	4.57422	0.0555222	1.90493	0		455.061	22.5605	433.307	42.4346	472.586	18.7229	480.713	21.189		-10.9406	-1.71978	0.002	0.00173228	0.00177071	0.000508342		938.907	6.78276	4812.01	652722	7.03941	0.0303954	11.9123	0.111351	2.42578	7.33161
NLJP02 S 21 1/1/2018 10:08:32 PM (Run: 1)			256.313	63.8604	22.6178	0.24915	399.99		0.0213593	9.26242	18.0432	2.70146	0.612802	5.67754	0.0801922	4.99365	0.877827	12.47	4.99365	0.0554226	2.70146	2.58019e-16		427.171	39.1512	429.285	60.221	485.326	21.9043	497.27	23.8983		-15.8368	-2.46107	37.7235	0.866611	0.001	0.47602		1440	7.11075	3819.08	452279	3.44314		3.37338	0.0203781	0.998677	3.35089
NLJP02 S 19 1/1/2018 9:58:03 PM (Run: 1)			251.471	54.9306	23.3107	0.218437	1141.81		0.0213959	9.32579	17.6682	1.71037	0.663934	8.41314	0.0850776	8.23745	0.978413	11.754	8.23745	0.056599	1.71037	-4.93836e-16		427.896	39.4852	475.947	37.82	517.018	34.0861	526.36	41.6357		-10.5921	-1.80686	37.6689	0.868673	0.001	0.475433		608.799	5.83691	1491.16	442846	2.05104	0.0118169	4.82554	0.0433748	0.620353	1.72057
NLJP02 S 242 1/13/2016 3:03:20 AM (Run: 1)			61.2645	62.3205	7.74516	1.01724	233.672		0.0263385	10.1897	15.8374	7.67497	0.814107	9.10445	0.0935115	4.89753	0.537927	10.6939	4.89753	0.0631415	7.67497	0		525.468	52.8538	713.026	163.088	604.755	41.486	576.272	26.9983		19.1795	4.70995	0.002	0.00224696	0.00228988	0.00241733
NLJP02 L 198 1/13/2016 1:15:11 AM (Run: 1)			14.9191	13.7503	2.04505	0.921654	43.2666		0.0374014	12.098	18.8683	10.5311	0.710384	12.9258	0.0972132	7.4949	0.579839	10.2867	7.4949	0.0529989	10.5311	1.80466e-16		742.168	88.159	328.717	238.951	544.974	54.5115	598.057	42.8074		-81.9365	-9.74031	0.002	0.00361464	0.00364302	0.00278717		67.9614	21.9157	541.69	527356	4.45606	0.0109134	37.8505	0.0720654	2.48302	6.11419
NLJP02 L 140 1/12/2016 10:59:57 PM (Run: 1)			386.562	286.622	49.7841	0.741464	772.526		0.0310475	4.43143	16.674	2.39201	0.824688	4.40524	0.0997305	3.69925	0.839738	10.027	3.69925	0.0599736	2.39201	-2.00853e-16		617.993	26.9715	602.596	51.7671	610.66	20.2162	612.83	21.6259		-1.69823	-0.355217	0.002	0.0017861	0.00184464	0.000699856		94.8247	6.7471	3544.55	580506	12.4052	0.0200828	21.2212	0.727064	12.6112	21.697
NLJP02 L 191 1/13/2016 1:03:09 AM (Run: 1)			18.6001	28.3464	4.14129	1.524	121.398		0.0495787	8.80343	14.5442	10.0863	1.30175	11.9419	0.137314	6.39339	0.535373	7.28256	6.39339	0.0687559	10.0863	0		978.042	84.0513	891.414	208.303	846.494	68.5763	829.457	49.7605		6.95042	2.01255	0.002	0.00434255	0.00438952	0.00346273		172.749	9.97327	1373.85	540514	3.01864	0.0708766	52.1387	0.872888	18.7557	23.779
NLJP02 M 210 1/13/2016 1:50:08 AM (Run: 1)			45.4731	25.3988	8.38989	0.558545	236.526		0.0481824	8.02141	14.2465	5.05145	1.42221	6.71058	0.14695	4.41755	0.658297	6.80506	4.41755	0.0701928	5.05145	0		951.135	74.5272	934.018	103.631	898.288	40.0075	883.841	36.4858		5.37209	1.60822	0.002	0.00317204	0.00324579	0.00176317
NLJP02 S 236 1/13/2016 2:49:16 AM (Run: 1)			48.0904	81.5658	11.5536	1.69609	98.8559		0.0468813	6.08948	14.0804	4.64971	1.46654	7.59206	0.149765	6.00164	0.790515	6.67714	6.00164	0.0710205	4.64971	-1.27573e-16		926.03	55.1181	958.004	95.0374	916.705	45.8348	899.645	50.3951		6.09181	1.86109	0.002	0.00443844	0.00449417	0.00164048
NLJP02 L 201 1/13/2016 1:27:27 AM (Run: 1)			13.3744	16.1455	3.10174	1.2072	367.871		0.0544609	12.71	13.7408	7.42707	1.55073	9.39518	0.154542	5.75395	0.612437	6.47073	5.75395	0.0727758	7.42707	-1.6665e-16		1071.84	132.682	1007.7	150.656	950.783	57.9971	926.374	49.6503		8.07037	2.56719	0.002	0.00438709	0.00444614	0.00269572		192.244	41.1896	825.439	534428	4.12812		42.6977	0.188728	3.12182	7.87418
NLJP02 L 181 1/13/2016 12:38:51 AM (Run: 1)			135.202	92.3338	27.4059	0.682933	1255.62		0.0537085	4.75137	14.0044	2.45055	1.52352	3.59072	0.154743	2.62451	0.730915	6.46232	2.62451	0.0714061	2.45055	1.38291e-16		1057.42	48.9502	969.083	50.0021	939.894	22.0116	927.497	22.6721		4.29127	1.31901	0.002	0.00189877	0.00203062	0.000854422		107.615	6.27005	1923.4	567987	36.843	0.0205657	96.3854	0.0345683	0.734266	4.20901
NLJP02 L 180 1/13/2016 12:37:08 AM (Run: 1)			18.3742	24.7108	4.27333	1.34486	346.783		0.0486293	7.12368	13.7369	7.79709	1.56055	9.45413	0.155476	5.3466	0.56553	6.43187	5.3466	0.0727968	7.79709	0		959.751	66.7718	1008.32	158.144	954.684	58.5054	931.586	46.3765		7.61033	2.41946	0.002	0.00409283	0.00415633	0.00283152		181.924	20.7226	1144.93	563654	2.50284		33.5136	0.277027	5.9997	12.9262
NLJP02 S 270 1/13/2016 4:02:47 AM (Run: 1)			29.6677	67.9453	8.15036	2.29021	705.112		0.046418	6.33466	14.5918	7.67099	1.48609	8.56423	0.157272	3.80815	0.444657	6.3584	3.80815	0.0685316	7.67099	0		917.084	56.7959	884.683	158.587	924.72	51.9812	941.601	33.3617		-6.43369	-1.82547	0.002	0.00289967	0.00299458	0.00262237		174.812	36.3273	1781.19	655436	2.67692	0.108009	45.5754	1.02083	16.5799	22.1457
NLJP02 S 228 1/13/2016 2:28:17 AM (Run: 1)			205.601	59.4694	38.5233	0.289246	656.225		0.0561584	5.66257	13.5994	3.33439	1.61522	4.78059	0.159313	3.42577	0.716599	6.27696	3.42577	0.0735328	3.33439	1.55598e-16		1104.36	60.8572	1028.67	67.422	976.138	29.9803	952.956	30.3477		7.36023	2.37484	0.002	0.00262443	0.00272884	0.0012105		108.994	15.7823	602.097	561007	4.70343		15.5364	0.102464	1.48811	4.1796
NLJP02 S 232 1/13/2016 2:42:23 AM (Run: 1)			118.038	79.6739	24.5595	0.674984	3441.3		0.0546641	5.32256	14.0926	4.26579	1.56147	5.36596	0.159596	3.25524	0.606646	6.26582	3.25524	0.0709593	4.26579	-1.28107e-16		1075.74	55.7598	956.24	87.2141	955.049	33.214	954.532	28.8813		0.178662	0.0541545	0.002	0.00248676	0.00259762	0.00150188
NLJP02 S 227 1/13/2016 2:26:34 AM (Run: 1)			18.7672	20.7553	4.36624	1.10593	274.517		0.0553814	10.4858	14.1445	6.36268	1.557	8.04654	0.159727	4.92575	0.612158	6.2607	4.92575	0.0706987	6.36268	-4.54448e-16		1089.48	111.216	948.711	130.236	953.278	49.7505	955.257	43.7333		-0.689973	-0.207584	0.002	0.00386157	0.00393386	0.00224142		210.785	23.8992	1205.16	558714	3.45714		39.8305	0.600506	11.0414	17.7819
NLJP02 M 225 1/13/2016 2:23:04 AM (Run: 1)			9.6811	9.78923	2.11575	1.01117	54.5911		0.0455449	18.2568	13.734	9.77724	1.6104	11.7674	0.16041	6.54812	0.556461	6.23403	6.54812	0.0728119	9.77724	0		900.212	160.744	1008.71	198.298	974.265	73.7121	959.054	58.3518		4.92266	1.56126	0.002	0.00519755	0.00525191	0.00355431
NLJP02 S 241 1/13/2016 3:01:37 AM (Run: 1)			42.8099	38.2695	9.14782	0.893939	2425.46		0.0457991	6.19713	13.832	5.48882	1.60252	6.62623	0.160763	3.71211	0.560215	6.22033	3.71211	0.0722961	5.48882	1.74726e-16		905.126	54.8544	994.282	111.566	971.192	41.4291	961.016	33.1423		3.34569	1.04778	0.002	0.00288586	0.00298385	0.00197494		167.027	25.5078	863.11	672658	3.27446		20.0297	0.0488706	1.68003	4.67652
NLJP02 L 178 1/13/2016 12:26:35 AM (Run: 1)			9.64132	13.3271	2.38964	1.38229	37.4504		0.0543569	8.01375	14.3099	12.1276	1.55186	13.2232	0.161059	5.27015	0.398553	6.20889	5.27015	0.0698819	12.1276	-2.22862e-16		1069.85	83.5055	924.885	249.154	951.233	81.6511	962.662	47.1274		-4.08448	-1.2015	0.002	0.00417738	0.00424404	0.00423349		126.735	50.0142	468.243	535848	1.66574		29.4289	0.0952392	3.0645	4.9225
NLJP02 M 220 1/13/2016 2:14:26 AM (Run: 1)			58.9964	103.759	16.3703	1.75873	396.746		0.0588539	3.85923	13.9917	4.62175	1.5969	5.26976	0.16205	2.53176	0.480431	6.17094	2.53176	0.0714708	4.62175	1.52107e-16		1155.87	43.3563	970.9	94.2793	969	32.9036	968.158	22.7596		0.28242	0.0868824	0.002	0.00190521	0.00205135	0.0016408		124.085	26.3071	677.02	521328	4.55486		75.8981	0.166535	4.73385	7.49534
NLJP02 S 264 1/13/2016 3:48:43 AM (Run: 1)			22.8241	50.5404	6.13437	2.21435	459.19		0.0424314	6.88676	13.7515	5.70446	1.63027	7.68859	0.162595	5.15495	0.670468	6.15024	5.15495	0.0727193	5.70446	-1.21086e-16		839.933	56.6588	1006.14	115.74	981.962	48.3877	971.183	46.4753		3.47387	1.09771	0.002	0.00411916	0.00419085	0.00206531		142.194	36.4791	1852.99	676179	2.11418	0.0188718	36.0677	0.716108	14.8422	19.2821
NLJP02 L 153 1/12/2016 11:29:24 PM (Run: 1)			43.5774	59.2171	10.8384	1.35889	1121.05		0.0541619	4.2315	13.7534	5.09	1.63321	5.77433	0.162911	2.72668	0.472208	6.1383	2.72668	0.072709	5.09	0		1066.11	43.9434	1005.87	103.277	983.097	36.3654	972.936	24.624		3.27373	1.03349	0.002	0.00208871	0.00222104	0.00184056		143.37	14.1619	1393.89	606784	1.14141	0.0576835	27.1092	0.787428	13.0838	17.4165
NLJP02 L 155 1/12/2016 11:32:51 PM (Run: 1)			32.5167	23.1336	6.90396	0.711437	142.807		0.052091	9.83147	14.1209	6.20292	1.59469	7.02903	0.163319	3.30621	0.470365	6.12298	3.30621	0.0708171	6.20292	0		1026.36	98.3875	952.153	126.898	968.136	43.8648	975.196	29.9218		-2.4202	-0.729337	0.002	0.00259146	0.00269984	0.00218847		156.894	23.1155	904.274	576374	1.85061		7.86261	0.10846	2.71968	5.16059
NLJP02 L 159 1/12/2016 11:46:50 PM (Run: 1)			38.044	52.306	9.71456	1.37488	1027.73		0.0562917	6.49218	13.8698	4.56834	1.64662	6.19217	0.165639	4.1801	0.675063	6.03722	4.1801	0.0720988	4.56834	0		1106.91	69.93	988.735	92.9349	988.254	39.1178	988.039	38.2917		0.070413	0.0217674	0.002	0.00337556	0.00346194	0.0016359		141.788	23.5053	814.08	556871	3.11716		62.8969	0.163121	3.48863	7.02245
NLJP02 L 207 1/13/2016 1:37:46 AM (Run: 1)			51.5045	46.4564	12.1274	0.901987	380.797		0.0636483	5.24339	13.904	3.21621	1.644	4.57843	0.165783	3.25853	0.711713	6.03199	3.25853	0.0719218	3.21621	1.69828e-16		1247.19	63.4181	983.721	65.4788	987.249	28.9059	988.834	29.8718		-0.519771	-0.16051	0.002	0.00258742	0.00270104	0.00114089		153.466	19.1457	660.61	530113	3.26204	0.0286373	23.9695	0.0577627	1.40336	3.38132
NLJP02 S 263 1/13/2016 3:47:00 AM (Run: 1)			231.419	103.402	45.9202	0.446818	1621.36		0.0448453	5.58404	13.7429	3.10555	1.66738	6.13141	0.166192	5.28675	0.862241	6.01713	5.28675	0.0727649	3.10555	0		886.684	48.4424	1007.42	62.9971	996.188	38.917	991.097	48.5677		1.62036	0.511057	0.002	0.00432194	0.00439308	0.00111359
NLJP02 L 156 1/12/2016 11:34:34 PM (Run: 1)			35.4678	30.5622	8.19348	0.86169	262.337		0.0596757	8.93006	12.9117	5.5257	1.77615	6.62852	0.166327	3.66113	0.55233	6.01226	3.66113	0.0774491	5.5257	0		1171.55	101.646	1132.78	110.007	1036.77	43.0609	991.842	33.657		12.4414	4.33374	0.002	0.00294542	0.00304472	0.0021301		138.447	30.5994	808.564	568107	1.81141		9.12208	0.0584616	2.25448	3.56811
NLJP02 L 160 1/12/2016 11:48:33 PM (Run: 1)			66.8386	51.2987	14.8882	0.767502	344.09		0.056264	7.00087	14.1488	4.36184	1.63127	6.87881	0.167396	5.31905	0.773252	5.97386	5.31905	0.0706771	4.36184	3.06836e-16		1106.38	75.3741	948.094	89.2898	982.349	43.3015	997.748	49.1677		-5.23727	-1.56761	0.002	0.00438369	0.00445194	0.00153016		123.17	26.4881	519.075	557098	2.1777		27.0447	0.0579092	1.58278	3.15987
NLJP02 L 161 1/12/2016 11:50:16 PM (Run: 1)			129.126	48.3283	26.1735	0.374272	1071.5		0.0605383	6.68605	13.6776	2.16085	1.68901	4.10748	0.167548	3.49315	0.850437	5.96842	3.49315	0.0731121	2.16085	-2.35652e-16		1188	77.1412	1017.04	43.7701	1004.39	26.1966	998.589	32.3148		1.81436	0.577299	0.002	0.00282134	0.00292636	0.000766147
NLJP02 L 200 1/13/2016 1:25:44 AM (Run: 1)			89.3476	39.5384	18.4648	0.442523	2052.64		0.0598728	6.66041	13.7625	4.10688	1.67996	5.76342	0.167685	4.04358	0.701594	5.96356	4.04358	0.0726613	4.10688	0		1175.31	76.0482	1004.54	83.3457	1000.97	36.6843	999.344	37.4329		0.516849	0.162119	0.002	0.00329858	0.00339024	0.00147968		99.0857	9.41424	583.687	526775	1.76656		6.2208	0.0461465	0.576588	2.48082
NLJP02 L 196 1/13/2016 1:11:45 AM (Run: 1)			131.698	67.3415	27.9325	0.511332	812.983		0.0622395	5.96681	13.8719	2.59574	1.66922	4.67046	0.167938	3.88269	0.83133	5.95458	3.88269	0.0720883	2.59574	3.52946e-16		1220.4	70.6641	988.435	52.8084	996.891	29.6564	1000.74	35.9898		-1.24486	-0.386105	0.002	0.00316485	0.00326025	0.00091607		95.4936	20.1309	399.051	508971	4.39972		29.9756	0.0417221	0.878297	1.93792
NLJP02 S 258 1/13/2016 3:34:36 AM (Run: 1)			67.1363	75.069	16.3878	1.11816	366.374		0.0567384	5.08908	13.7498	3.08953	1.6857	4.70066	0.168104	3.54274	0.753669	5.94871	3.54274	0.0727282	3.08953	0		1115.45	55.2283	1006.37	62.6828	1003.14	29.9579	1001.65	32.8665		0.468977	0.148138	0.002	0.00286934	0.00297774	0.00110708		91.8231	17.5686	473.773	555357	3.75549		33.0129	0.0403897	1.43547	3.04436
NLJP02 S 256 1/13/2016 3:31:10 AM (Run: 1)			101.131	128.242	26.0145	1.26808	544.233		0.0594011	4.02208	13.2567	2.12541	1.7566	5.95807	0.168891	5.56607	0.934208	5.92097	5.56607	0.0754334	2.12541	3.0077e-16		1166.32	45.5824	1080.05	42.6459	1029.59	38.5509	1006	51.8442		6.85594	2.29175	0.002	0.00463185	0.0047003	0.000776698
NLJP02 L 187 1/13/2016 12:49:10 AM (Run: 1)			39.3894	55.3532	10.3799	1.40528	435.916		0.0579155	5.86787	13.2078	4.60868	1.76381	5.72114	0.168959	3.38991	0.592523	5.91858	3.38991	0.0757128	4.60868	-2.27877e-16		1137.95	64.9287	1087.5	92.3675	1032.25	37.0729	1006.38	31.5856		7.45976	2.50667	0.002	0.0027535	0.00286378	0.00173321		165.356	10.6645	779.985	581836	2.15312		23.4425	0.0772863	2.89701	5.71106
NLJP02 L 208 1/13/2016 1:39:29 AM (Run: 1)			9.74195	23.5484	3.13871	2.41721	114.859		0.0579216	7.64625	13.3438	8.10863	1.7471	9.55736	0.169082	5.05898	0.529328	5.91429	5.05898	0.074941	8.10863	-1.73615e-16		1138.07	84.6151	1066.94	163.013	1026.09	61.7179	1007.05	47.1665		5.61354	1.85559	0.002	0.00420313	0.00427692	0.0030319		155.549	66.8216	1099.45	517754	0.668916	0.133638	45.7551	1.32678	23.268	26.3254
NLJP02 M 214 1/13/2016 1:57:01 AM (Run: 1)			60.9446	24.0098	12.4464	0.393961	740.869		0.0566952	8.64481	13.5823	3.88106	1.7165	4.91239	0.169089	3.01147	0.613035	5.91403	3.01147	0.073625	3.88106	0		1114.63	93.7486	1031.21	78.4454	1014.72	31.5179	1007.09	28.0779		2.33859	0.751337	0.002	0.0024197	0.00254604	0.00141544		115.223	19.9559	489.907	540697	1.49485		5.03996	0.0279716	0.545216	2.90102
NLJP02 L 192 1/13/2016 1:04:52 AM (Run: 1)			21.858	31.7834	5.76351	1.45408	214.268		0.0564107	7.83002	14.0035	7.01689	1.66566	8.79861	0.16917	5.30838	0.60332	5.91122	5.30838	0.0714105	7.01689	0		1109.18	84.5093	969.171	143.176	995.534	55.8246	1007.54	49.5137		-3.95853	-1.20553	0.002	0.00442022	0.00449009	0.0024983		268.935	66.922	1522.81	518784	2.1584	0.385199	20.9361	1.31066	21.6047	25.5451
NLJP02 M 222 1/13/2016 2:17:52 AM (Run: 1)			167.253	66.6353	34.4558	0.398411	2877.19		0.058969	6.83844	13.4808	2.39509	1.73589	4.49251	0.169722	3.80082	0.846034	5.892	3.80082	0.0741795	2.39509	-1.95353e-16		1158.07	76.9679	1046.38	48.2991	1021.94	28.943	1010.58	35.5509		3.42138	1.11179	0.002	0.00312563	0.00322541	0.000866507		99.7395	8.80693	542.537	543690	2.68769		10.2208	0.00716595	0.605266	1.57054
NLJP02 S 245 1/13/2016 3:08:30 AM (Run: 1)			134.643	103.399	29.9832	0.767952	6990.32		0.0516231	4.44671	13.3218	2.47278	1.7599	3.86884	0.17004	2.97545	0.76908	5.88099	2.97545	0.0750651	2.47278	-1.20873e-16		1017.37	44.12	1070.25	49.6879	1030.81	25.0499	1012.33	27.8753		5.41155	1.79314	0.002	0.00239914	0.00252972	0.000906801		206.903	18.0871	1114.61	674061	4.96672	1.82237	26.2808	0.524968	3.81477	5.51488
NLJP02 L 199 1/13/2016 1:24:01 AM (Run: 1)			229.634	331.365	62.084	1.44301	1694.86		0.0603594	3.65958	13.3229	2.72023	1.76358	4.8356	0.170408	3.99792	0.826769	5.86826	3.99792	0.0750589	2.72023	-1.63395e-16		1184.59	42.1052	1070.08	54.6615	1032.16	31.3331	1014.36	37.5237		5.20701	1.72481	0.002	0.00331243	0.00340639	0.00100148		119.168	11.8492	444.058	519182	1.84621		14.9988	0.0316673	0.830915	0.793191
NLJP02 L 171 1/13/2016 12:14:33 AM (Run: 1)			145.669	74.9457	31.3134	0.514492	3716.11		0.0616715	4.83885	13.7807	2.30157	1.70744	3.46034	0.170654	2.58394	0.746729	5.85981	2.58394	0.072565	2.30157	1.49506e-16		1209.59	56.8131	1001.84	46.7277	1011.32	22.1582	1015.71	24.2822		-1.3843	-0.433992	0.002	0.00205753	0.0022048	0.000812896		153.642	15.3165	1069.11	530326	2.3586		10.6438	0.0932866	2.33118	5.40535
NLJP02 L 164 1/12/2016 11:55:26 PM (Run: 1)			282.235	183.269	63.6103	0.649348	3865.35		0.064424	3.55825	13.4888	2.10292	1.74669	3.01587	0.170878	2.16176	0.716795	5.85211	2.16176	0.0741355	2.10292	0		1261.92	43.5293	1045.15	42.4158	1025.94	19.4737	1016.95	20.3377		2.6981	0.876122	0.002	0.00166878	0.00184699	0.000754697		278.96	5.77518	1164.56	522807	7.52966		26.7785	0.0390692	0.923985	4.38327
NLJP02 L 209 1/13/2016 1:48:19 AM (Run: 1)			67.3417	51.5148	15.3789	0.764977	405.69		0.0582713	4.68695	13.6827	2.4838	1.72284	3.77906	0.170969	2.84816	0.753669	5.84903	2.84816	0.0730848	2.4838	-1.25777e-16		1144.75	52.1627	1016.3	50.3172	1017.08	24.2793	1017.45	26.8073		-0.113064	-0.0355662	0.002	0.00229951	0.00243473	0.000886906		166.528	30.1991	762.044	522001	3.6952		13.9442	0.0561089	1.85355	4.29426
NLJP02 S 240 1/13/2016 2:59:54 AM (Run: 1)			142.472	95.8644	31.0295	0.672865	2739.52		0.0486992	5.67323	13.3311	2.94696	1.77796	4.85048	0.171905	3.8526	0.794273	5.81718	3.8526	0.0750126	2.94696	-3.13301e-16		961.099	53.2493	1068.83	59.2289	1037.44	31.5218	1022.6	36.4307		4.32577	1.43038	0.002	0.00321077	0.0033114	0.00108749		117.002	16.0986	547.009	664805	3.94469		17.6515	0.034214	0.75581	1.6604
NLJP02 L 142 1/12/2016 11:03:24 PM (Run: 1)			20.7141	15.0569	4.69904	0.726895	320.197		0.0569717	8.68297	13.1228	6.12973	1.8064	8.92982	0.171925	6.49369	0.727192	5.8165	6.49369	0.0762035	6.12973	0		1119.91	94.5968	1100.4	122.619	1047.78	58.3629	1022.71	61.4113		7.06056	2.39274	0.002	0.00552505	0.00558213	0.00232698		146.863	11.5668	990.778	570594	0.935536	0.0957405	4.70305	0.271788	5.89486	9.31272
NLJP02 M 215 1/13/2016 1:58:44 AM (Run: 1)			29.9597	18.6782	6.66862	0.623443	787.649		0.0595164	9.12459	13.3709	4.2778	1.77572	6.8827	0.172201	5.39185	0.783391	5.80718	5.39185	0.0747891	4.2778	-1.54363e-16		1168.52	103.599	1062.84	86.0534	1036.62	44.7083	1024.23	51.0609		3.63323	1.19521	0.002	0.00457173	0.0046424	0.00158744		161.537	36.1142	692.531	529280	1.7324		8.53488	0.0598911	1.64298	4.21912
NLJP02 L 174 1/13/2016 12:19:42 AM (Run: 1)			105.358	148.047	28.9318	1.40518	1345.61		0.0633294	5.12997	13.9965	3.42013	1.70396	4.26307	0.172973	2.54489	0.596963	5.78125	2.54489	0.0714463	3.42013	0		1241.13	61.7539	970.218	69.774	1010.02	27.2779	1028.47	24.1923		-6.00406	-1.82689	0.002	0.00204901	0.00220099	0.00120719		220.512	7.82423	1547.24	539338	3.0349	0.0327917	32.7141	0.421271	7.85814	13.4026
NLJP02 S 230 1/13/2016 2:38:57 AM (Run: 1)			69.804	49.2207	15.908	0.705128	2018.73		0.0584405	5.60949	13.0617	3.71631	1.82728	5.00731	0.173104	3.35592	0.670204	5.77689	3.35592	0.0765594	3.71631	-2.85369e-16		1147.98	62.6013	1109.73	74.2376	1055.3	32.8603	1029.19	31.9227		7.25796	2.47473	0.002	0.00278814	0.00290461	0.0014082		137.929	24.8589	648.022	557747	1.63351		15.2377	0.0463585	1.69634	3.93769
NLJP02 L 177 1/13/2016 12:24:51 AM (Run: 1)			164.866	69.0326	35.3064	0.41872	16226.5		0.0656341	3.6427	13.3027	2.67057	1.79782	3.54637	0.173454	2.33341	0.657971	5.76522	2.33341	0.0751729	2.67057	0		1284.89	45.3479	1073.13	53.6392	1044.67	23.1388	1031.11	22.2345		3.91539	1.2975	0.002	0.00185639	0.0020237	0.000984029		115.142	11.7546	573.075	526701	4.16604		12.9863	0.0645709	0.61084	2.22385
NLJP02 S 237 1/13/2016 2:50:59 AM (Run: 1)			45.9924	69.2267	12.0191	1.50518	189.506		0.0495582	4.82371	13.6923	4.06345	1.74887	6.14916	0.173672	4.61526	0.75055	5.75797	4.61526	0.073034	4.06345	0		977.647	46.0365	1014.91	82.3342	1026.74	39.7237	1032.31	44.0249		-1.71447	-0.542424	0.002	0.00392329	0.00400772	0.00147131		246.222	39.5497	2533.34	644290	3.4161	0.0634803	28.4567	1.1833	18.9494	27.5187
NLJP02 M 224 1/13/2016 2:21:21 AM (Run: 1)			18.1182	29.4683	4.90802	1.62645	137.611		0.0515632	6.02979	13.4901	7.60043	1.77562	9.51333	0.173725	5.72163	0.601432	5.75621	5.72163	0.0741284	7.60043	-3.27522e-16		1016.22	59.7611	1044.98	153.302	1036.58	61.7948	1032.6	54.5927		1.18419	0.383195	0.002	0.00490251	0.00496996	0.00281024		224.146	39.9848	1370.17	583527	2.27361	0.146855	23.2957	0.455711	7.64891	12.7075
NLJP02 L 184 1/13/2016 12:44:01 AM (Run: 1)			50.4461	36.0422	11.6111	0.714469	7247.88		0.058945	6.53912	12.9356	4.20399	1.85695	5.35883	0.174216	3.32318	0.620132	5.74001	3.32318	0.0773058	4.20399	3.82202e-16		1157.61	73.5707	1129.1	83.7387	1065.9	35.3669	1035.3	31.7842		8.30755	2.87144	0.002	0.00277878	0.00289475	0.00161212		121.641	21.4908	440.106	582802	3.34557		22.0818	0.0132939	1.41397	1.95394
NLJP02 L 179 1/13/2016 12:35:25 AM (Run: 1)			101.207	38.1585	21.1941	0.377036	415.152		0.0579342	7.11309	13.3658	3.45124	1.79749	4.54822	0.174245	2.9623	0.65131	5.73903	2.9623	0.0748177	3.45124	0		1138.31	78.7313	1063.6	69.4184	1044.55	29.6735	1035.46	28.3367		2.64578	0.870075	0.002	0.00245029	0.00258084	0.00127591		115.211	18.4247	636.61	541210	2.28147		7.14005	0.0689805	1.49395	2.7516
NLJP02 L 165 1/12/2016 11:57:09 PM (Run: 1)			47.0322	53.5752	12.1023	1.13912	420.241		0.0604102	4.95362	13.5172	4.41332	1.78682	5.40809	0.175173	3.1257	0.577968	5.70864	3.1257	0.0739798	4.41332	-1.29026e-16		1185.56	57.039	1040.93	89.072	1040.67	35.2084	1040.55	30.0353		0.0367491	0.0113398	0.002	0.00261415	0.00273769	0.00162083		156.645	41.7167	1254.37	526159	0.573691		5.41447	0.13432	4.43548	9.33912
NLJP02 S 229 1/13/2016 2:37:14 AM (Run: 1)			90.6945	38.3312	19.3294	0.422641	29959.4		0.0573494	5.98555	13.1558	3.98122	1.83693	4.78106	0.175271	2.64735	0.553717	5.70546	2.64735	0.076012	3.98122	-1.68803e-16		1127.13	65.6186	1095.37	79.6998	1058.76	31.4339	1041.09	25.4508		4.95537	1.66955	0.002	0.00216871	0.00232002	0.00149977		127.364	19.2004	584.613	558868	1.71097		7.0978	0.0554116	0.62404	2.89152
NLJP02 L 146 1/12/2016 11:10:17 PM (Run: 1)			9.78589	9.83586	2.45618	1.00511	63.2699		0.0615305	12.7536	13.563	10.6194	1.78666	11.6839	0.17575	4.87257	0.417034	5.68989	4.87257	0.0737301	10.6194	-2.75279e-16		1206.9	149.418	1034.1	214.547	1040.61	76.0631	1043.72	46.9523		-0.929777	-0.298571	0.002	0.00420365	0.00428178	0.00391005		171.364	43.3856	589.681	532353	1.99292		16.8409	0.144624	2.22101	4.16791
NLJP02 L 185 1/13/2016 12:45:44 AM (Run: 1)			20.3238	15.4558	4.72238	0.760478	452.347		0.055375	10.338	12.6809	5.99488	1.91308	7.40545	0.175948	4.34765	0.587088	5.68351	4.34765	0.0788586	5.99488	0		1089.36	109.637	1168.61	118.72	1085.66	49.3813	1044.8	41.9342		10.5949	3.76376	0.002	0.00373596	0.00382479	0.00235457		127.919	40.9799	391.094	601073	0.796423		9.00626	0.0129037	1.29174	2.02005
NLJP02 L 175 1/13/2016 12:21:26 AM (Run: 1)			86.0006	53.4853	19.8781	0.621917	768.47		0.0668271	5.33204	13.3856	3.46348	1.81406	4.37164	0.176113	2.6675	0.610182	5.67819	2.6675	0.0747069	3.46348	0		1307.5	67.5093	1060.6	69.6967	1050.55	28.615	1045.7	25.7492		1.40483	0.46098	0.002	0.0022017	0.0023489	0.00127867		111.201	19.4049	486.222	519762	3.40047		27.4393	0.0838132	1.17289	2.41422
NLJP02 S 254 1/13/2016 3:27:43 AM (Run: 1)			23.4277	26.8595	6.03907	1.14648	98.4483		0.0589889	8.18792	13.9219	6.77442	1.75308	8.16758	0.177012	4.56253	0.558615	5.64935	4.56253	0.071829	6.77442	0		1158.45	92.1859	981.096	137.975	1028.3	52.8089	1050.63	44.2328		-7.0872	-2.17126	0.002	0.00395021	0.0040381	0.00242565		259.533	23.2334	1443.77	614123	7.58921	0.0429561	33.5983	0.507347	7.15658	10.7641
NLJP02 M 223 1/13/2016 2:19:36 AM (Run: 1)			138.381	80.3168	31.2113	0.580404	1046.36		0.0600179	5.73506	13.2773	2.8034	1.83951	4.56329	0.177138	3.60063	0.789042	5.64532	3.60063	0.0753165	2.8034	1.76196e-16		1178.08	65.6323	1076.96	56.275	1059.69	30.017	1051.32	34.9285		2.3806	0.789605	0.002	0.00307885	0.00318904	0.00103685		128.612	17.4305	772.167	548612	7.10991		24.8401	0.124191	1.71997	3.77226
NLJP02 S 235 1/13/2016 2:47:32 AM (Run: 1)			172.613	87.8568	37.5785	0.50898	17916.1		0.0532934	3.60807	13.5286	2.03387	1.80698	5.02193	0.177299	4.59164	0.914318	5.64019	4.59164	0.0739173	2.03387	1.90386e-16		1049.45	36.8988	1039.23	41.0591	1047.99	32.8257	1052.2	44.5764		-1.2483	-0.402217	0.002	0.00398409	0.00407046	0.000726001		132.352	9.40743	804.392	610180	3.22628		22.1236	0.235988	3.89402	5.42986
NLJP02 M 216 1/13/2016 2:00:27 AM (Run: 1)			27.0713	19.2652	6.38139	0.711647	681.833		0.0620251	8.50635	13.7186	6.54113	1.79081	7.90702	0.178179	4.44237	0.561826	5.61232	4.44237	0.0728939	6.54113	0		1216.32	100.413	1010.98	132.619	1042.12	51.5184	1057.02	43.309		-4.55402	-1.42981	0.002	0.00386858	0.00395769	0.00237627		128.604	13.4574	476.773	527959	2.00297		46.4609	0.0841376	1.77666	5.9272
NLJP02 S 239 1/13/2016 2:58:11 AM (Run: 1)			121.851	97.0642	28.2028	0.796581	2838.6		0.0495344	5.5405	13.3284	2.62218	1.84491	5.52401	0.178341	4.86198	0.880154	5.60722	4.86198	0.0750277	2.62218	1.39531e-16		977.188	52.8532	1069.24	52.6979	1061.61	36.374	1057.91	47.4365		1.06029	0.349207	0.002	0.00425322	0.00433546	0.000963614		149.753	14.4803	943.952	663653	5.01024		33.0957	0.0610492	2.10531	3.41851
NLJP02 S 266 1/13/2016 3:52:09 AM (Run: 1)			35.7557	48.315	9.36073	1.35125	269.822		0.0507846	4.99235	13.706	4.69314	1.80737	6.54953	0.179662	4.56845	0.697524	5.56601	4.56845	0.0729607	4.69314	1.66049e-16		1001.25	48.7681	1012.84	95.125	1048.13	42.8141	1065.13	44.8524		-5.16244	-1.62203	0.002	0.00401423	0.00410388	0.00170132		183.266	22.9078	1405.45	665087	3.06388		23.7978	0.17811	5.30477	8.62299
NLJP02 L 154 1/12/2016 11:31:08 PM (Run: 1)			67.2713	28.49	14.7362	0.423509	2662.96		0.0588683	9.43369	13.3694	4.06577	1.85928	5.24356	0.180284	3.31125	0.63149	5.5468	3.31125	0.0747974	4.06577	1.32188e-16		1156.15	106.007	1063.06	81.7854	1066.73	34.6214	1068.53	32.6048		-0.513906	-0.16827	0.002	0.00286549	0.00298483	0.00150779
NLJP02 L 163 1/12/2016 11:53:43 PM (Run: 1)			19.7819	16.9487	5.00239	0.856779	64.959		0.0681181	8.81708	13.83	7.0953	1.80444	8.07574	0.180993	3.8567	0.477567	5.52507	3.8567	0.0723068	7.0953	0		1331.95	113.653	994.615	144.21	1047.07	52.7604	1072.4	38.1021		-7.82044	-2.41923	0.002	0.00338754	0.00349019	0.00255813		106.381	43.0289	416.739	527937	1.14288		14.3961	0.136767	2.35482	3.74685
NLJP02 L 162 1/12/2016 11:51:59 PM (Run: 1)			26.3235	18.5449	6.35623	0.7045	202.833		0.0644569	10.3613	12.7321	6.90461	1.96425	7.36465	0.181382	2.5621	0.347892	5.51321	2.5621	0.0785416	6.90461	2.01267e-16		1262.55	126.815	1160.62	136.897	1103.34	49.5523	1074.52	25.3583		7.41785	2.61173	0.002	0.00216572	0.0023236	0.00270361		121.066	31.9057	481.857	542708	2.09931	0.0423228	12.7291	0.0497973	1.06663	2.51645
NLJP02 L 170 1/13/2016 12:12:50 AM (Run: 1)			83.1563	69.3712	20.6424	0.834227	2227.61		0.0631367	4.80944	13.339	2.90564	1.87752	4.53081	0.181638	3.47642	0.767284	5.50546	3.47642	0.0749683	2.90564	0		1237.46	57.7298	1067.67	58.408	1073.19	30.0174	1075.92	34.4487		-0.772869	-0.254165	0.002	0.00304246	0.00315725	0.00107111		167.999	25.0218	957.423	542432	5.1368		26.6224	0.0890994	3.31904	6.55571
NLJP02 L 173 1/13/2016 12:17:59 AM (Run: 1)			84.0473	177.612	28.1731	2.11324	1631.81		0.0660609	4.32597	13.3464	3.09906	1.8768	4.09563	0.18167	2.67769	0.653791	5.50449	2.67769	0.0749264	3.09906	2.14414e-16		1292.98	54.1824	1066.54	62.3065	1072.93	27.1306	1076.09	26.5378		-0.895368	-0.294127	0.002	0.00228112	0.00243227	0.0011441
NLJP02 L 148 1/12/2016 11:13:43 PM (Run: 1)			149.801	54.9914	32.8043	0.367097	2596.79		0.0613322	6.72278	13.5482	3.01307	1.85996	5.41971	0.182761	4.50496	0.831218	5.47163	4.50496	0.0738107	3.01307	-3.93043e-16		1203.13	78.5232	1036.29	60.8548	1066.97	35.789	1082.04	44.874		-4.41512	-1.41217	0.002	0.00402882	0.00411665	0.00109499		80.2925	4.82909	333.23	535194	5.49929		18.9219	0.0350358	0.831748	1.68762
NLJP02 L 147 1/12/2016 11:12:00 PM (Run: 1)			63.2804	56.5211	15.9201	0.893185	2282.43		0.0605823	6.29459	12.8199	3.09972	1.96654	4.47199	0.182846	3.22341	0.720801	5.4691	3.22341	0.0780039	3.09972	1.78109e-16		1188.84	72.6743	1146.97	61.581	1104.12	30.1011	1082.5	32.1211		5.62106	1.95824	0.002	0.00282267	0.00294693	0.00119151		152.428	20.4886	944.899	516910	2.84206		18.5744	0.195286	3.494	7.41476
NLJP02 L 195 1/13/2016 1:10:02 AM (Run: 1)			20.9517	33.1463	6.20621	1.58204	156.838		0.0624471	6.53453	13.1657	6.77022	1.91733	8.14451	0.183079	4.52738	0.555881	5.46211	4.52738	0.0759548	6.77022	-2.32328e-16		1224.35	77.6305	1093.87	135.562	1087.14	54.3508	1083.78	45.1638		0.922672	0.309297	0.002	0.00405535	0.00414435	0.00256333		128.556	32.9272	524.337	514019	0.260418		5.45329	0.192457	3.91263	5.64415
NLJP02 L 188 1/13/2016 12:50:53 AM (Run: 1)			20.2556	8.252	4.53987	0.407393	704.823		0.0639651	14.7278	12.9805	6.57773	1.94906	8.42001	0.183492	5.25643	0.624278	5.44984	5.25643	0.0770386	6.57773	-2.05965e-16		1253.2	178.964	1122.19	131.155	1098.12	56.5047	1086.02	52.5364		3.22302	1.10209	0.002	0.00474616	0.00482256	0.00252553
NLJP02 L 193 1/13/2016 1:06:36 AM (Run: 1)			89.2995	56.1548	21.5615	0.628836	1356.49		0.0687666	5.6392	13.0498	2.94975	1.9421	4.80726	0.183811	3.79589	0.789615	5.44036	3.79589	0.0766298	2.94975	-1.58897e-16		1344.21	73.3372	1111.6	58.9074	1095.72	32.2212	1087.76	37.9945		2.14418	0.726513	0.002	0.00338177	0.00348864	0.00111196		120.406	16.25	589.427	520937	3.93121	0.657861	25.6125	0.167542	2.00966	2.92547
NLJP02 L 186 1/13/2016 12:47:27 AM (Run: 1)			151.961	152.612	39.0462	1.00429	4069.47		0.058262	4.8379	13.1915	2.08448	1.92593	4.18361	0.18426	3.62734	0.867034	5.4271	3.62734	0.0758065	2.08448	0		1144.57	53.8346	1089.96	41.7622	1090.13	27.9613	1090.21	36.3824		-0.0222434	-0.00740141	0.002	0.00323002	0.00334187	0.000764368		189.987	9.29392	1311.36	598287	12.7523	0.0115512	56.1815	0.0981473	3.24909	8.61135
NLJP02 L 197 1/13/2016 1:13:28 AM (Run: 1)			116.224	78.1955	28.7597	0.672798	9069.06		0.0696057	5.26445	12.3932	2.01506	2.06263	4.0363	0.185398	3.49731	0.866466	5.3938	3.49731	0.0806893	2.01506	2.52391e-16		1360.08	69.2447	1213.88	39.6445	1136.49	27.602	1096.4	35.2609		9.67858	3.52809	0.002	0.00312458	0.00324197	0.00078459		64.0345	20.0627	4322.74	512711	13.0857	0.0846742	28.1841	0.833278	16.6205	36.488
NLJP02 L 167 1/13/2016 12:00:35 AM (Run: 1)			75.7434	47.0565	18.2772	0.621262	1560.3		0.0590797	4.96589	13.6302	3.37816	1.92503	5.17955	0.1903	3.92629	0.758037	5.25487	3.92629	0.0733665	3.37816	1.34149e-16		1160.18	55.9911	1024.1	68.3538	1089.81	34.6122	1123	40.4652		-9.65682	-3.04485	0.002	0.00362994	0.00373585	0.00122408		125.81	11.8297	541.637	537091	3.11469		20.2554	0.0361523	1.16865	2.68829
NLJP02 S 238 1/13/2016 2:52:42 AM (Run: 1)			116.907	103.287	30.3576	0.883497	1172.3		0.0555363	5.14823	12.372	3.01902	2.16881	4.51083	0.194607	3.35158	0.743008	5.13857	3.35158	0.0808279	3.01902	0		1092.45	54.7487	1217.26	59.3675	1171.1	31.3481	1146.28	35.1966		5.83092	2.11889	0.002	0.00312979	0.0032612	0.00120137
NLJP02 L 149 1/12/2016 11:22:31 PM (Run: 1)			76.6432	47.6685	21.0247	0.621953	374.628		0.0724448	4.48457	12.1629	2.46662	2.39757	3.36363	0.211499	2.28687	0.679882	4.72816	2.28687	0.0822172	2.46662	-1.57712e-16		1413.65	61.2301	1250.69	48.2726	1241.88	24.1013	1236.8	25.7362		1.11069	0.408936	0.002	0.00221103	0.00241835	0.000990747		88.7436	17.3923	1934.68	527204	2.83046	0.14808	7.05609	0.691398	13.0175	18.1445
NLJP02 S 251 1/13/2016 3:22:34 AM (Run: 1)			93.8736	57.1259	25.073	0.608541	6938.15		0.0611174	5.79479	12.4703	2.53743	2.34984	3.92353	0.212527	2.99258	0.762728	4.70529	2.99258	0.0801907	2.53743	0		1199.04	67.4608	1201.69	50.0092	1227.51	27.9461	1242.26	33.8132		-3.3764	-1.20198	0.002	0.00301717	0.00318002	0.000995266		108.697	8.29208	860.431	656398	2.68311		6.34965	0.0285563	0.962695	2.425
NLJP02 L 150 1/12/2016 11:24:14 PM (Run: 1)			77.2427	10.9879	20.6767	0.142252	1452.71		0.0809541	10.9013	10.8136	3.60651	2.98516	4.46254	0.234118	2.62818	0.588943	4.27134	2.62818	0.0924763	3.60651	0		1573.4	165.015	1477.19	68.3968	1403.85	33.9417	1356.05	32.1405		8.20091	3.40475	0.002	0.00287906	0.00307653	0.00164981		76.6176	2.90118	332.866	549825	4.1854		4.21138		0.399807	0.642208
NLJP02 L 168 1/13/2016 12:02:18 AM (Run: 1)			11.66	17.8344	4.46424	1.52953	125.106		0.0819581	7.15294	10.5441	6.62366	3.06867	8.70506	0.234671	5.64847	0.648872	4.26128	5.64847	0.0948394	6.62366	-1.90346e-16		1592.16	109.516	1524.87	124.82	1424.9	66.6652	1358.94	69.2082		10.8819	4.62965	0.002	0.00653743	0.00662767	0.00313098		92.1776	12.2774	317.011	542615	0.837506		10.5335		0.473251	1.3268
NLJP02 L 176 1/13/2016 12:23:09 AM (Run: 1)			57.1748	38.1099	18.4291	0.666551	517.53		0.0957998	6.32022	10.2957	2.82299	3.14947	4.34408	0.235177	3.30179	0.760066	4.25212	3.30179	0.0971275	2.82299	0		1849.1	111.681	1569.7	52.8832	1444.87	33.479	1361.57	40.5259		13.2588	5.76507	0.002	0.00372544	0.00388252	0.00134684		2148.35	8.10708	1015	530178	2.03164	15.0861	55.7694	7.34006	45.6123	19.5012
NLJP02 L 157 1/12/2016 11:36:17 PM (Run: 1)			16.1726	5.75969	4.69142	0.35614	547.987		0.0747466	17.4156	11.6013	7.20026	2.87634	8.58989	0.242017	4.68428	0.545325	4.13194	4.68428	0.0861973	7.20026	2.11138e-16		1456.99	244.814	1342.6	139.094	1375.73	64.7196	1397.17	58.8409		-4.06465	-1.55841	0.002	0.00555614	0.00566838	0.00309493		140.602	40.778	555.403	576316	0.881243		2.70736	0.0881744	0.920718	2.61691
NLJP02 S 257 1/13/2016 3:32:53 AM (Run: 1)			33.2022	22.3397	10.8885	0.672836	640.774		0.080294	7.38879	10.7101	5.11862	3.21891	5.78435	0.250036	2.69415	0.465766	3.99943	2.69415	0.0933696	5.11862	2.58131e-16		1561.05	111.001	1495.4	96.8371	1461.72	44.8119	1438.66	34.7392		3.79413	1.57773	0.002	0.00315317	0.00336817	0.00237697		147.628	6.60791	1133.49	561738	2.28714		5.48159	0.12655	2.67224	5.41239
NLJP02 L 189 1/13/2016 12:59:43 AM (Run: 1)			95.8557	56.404	31.2032	0.588426	952.005		0.0825342	5.29923	10.3406	1.70596	3.36306	4.34844	0.25222	3.99983	0.919831	3.96479	3.99983	0.0967062	1.70596	0		1602.92	81.6615	1561.53	31.9924	1495.84	34.0335	1449.92	51.9348		7.14793	3.06994	0.002	0.00490549	0.00504418	0.000784437		153.656	6.94397	898.68	553087	1.9659		21.9082	0.111389	2.26491	5.28598
NLJP02 S 234 1/13/2016 2:45:49 AM (Run: 1)			92.0849	83.3803	32.2459	0.905473	861.018		0.0776768	5.55988	10.5971	2.381	3.32288	5.55908	0.255388	5.02337	0.903633	3.91562	5.02337	0.0943657	2.381	-1.48705e-16		1512.02	80.9992	1515.45	44.9245	1486.44	43.3885	1466.2	65.8772		3.24982	1.36177	0.002	0.00630097	0.00641453	0.00109554		194.299	19.1453	1268.53	601566	1.93441	0.0209484	14.9706	0.0985924	2.63975	6.25433
NLJP02 L 158 1/12/2016 11:38:00 PM (Run: 1)			95.4685	50.2324	31.2074	0.526168	970.833		0.0856758	5.24978	10.6937	2.48111	3.31864	4.40123	0.257387	3.63524	0.825959	3.88521	3.63524	0.0935132	2.48111	1.97194e-16		1661.49	83.7359	1498.31	46.9206	1485.44	34.3413	1476.46	47.9698		1.45855	0.605078	0.002	0.00452373	0.00467831	0.00113374		121.1	6.46126	1143.02	563868	0.594072		6.66657	0.284853	4.23238	8.04852
NLJP02 S 247 1/13/2016 3:11:56 AM (Run: 1)			102.75	117.852	37.8725	1.14698	538.949		0.0721519	5.10288	10.6664	2.71724	3.37429	4.53154	0.261036	3.62649	0.800278	3.83089	3.62649	0.093752	2.71724	0		1408.14	69.4096	1503.12	51.3534	1498.45	35.4936	1495.14	48.3924		0.530926	0.220604	0.002	0.0045701	0.00473322	0.00124959		179.617	7.3664	3334.78	667304	1.14817	0.080586	11.4841	0.776316	10.0432	18.9286
NLJP02 L 145 1/12/2016 11:08:34 PM (Run: 1)			20.8431	9.31837	6.96521	0.447071	87.9596		0.100815	9.69239	10.469	4.75073	3.46808	6.37263	0.263326	4.24747	0.666517	3.79758	4.24747	0.09552	4.75073	0		1941.39	179.413	1538.33	89.3658	1519.99	50.2246	1506.83	57.0724		2.04747	0.865244	0.002	0.00545772	0.00559234	0.00225507		93.4009	10.1025	234.796	543475	1.54465		4.3158			0.388846
NLJP02 L 152 1/12/2016 11:27:41 PM (Run: 1)			13.1683	8.34965	4.81208	0.634071	283.935		0.0906067	12.3226	10.0819	6.80561	3.82329	8.10986	0.279562	4.41061	0.543857	3.57703	4.41061	0.0991877	6.80561	0		1753.08	206.921	1608.89	126.842	1597.66	65.2735	1589.16	62.1202		1.22639	0.532333	0.002	0.00602742	0.00616519	0.00336509		106.191	21.2615	383.142	579134	0.756876		4.41405	0.0268601	0.88228	1.4172
NLJP02 L 172 1/13/2016 12:16:16 AM (Run: 1)			46.3767	41.8706	18.7057	0.902837	564.408		0.100628	5.66291	9.37264	3.07505	4.14668	4.01052	0.281878	2.57455	0.641949	3.54764	2.57455	0.106694	3.07505	0		1937.96	104.648	1743.67	56.3374	1663.55	32.8098	1600.81	36.495		8.19293	3.77159	0.002	0.00338395	0.00362853	0.00161618		190.862	21.6858	1087.28	531098	4.06205	0.0301091	72.3387	0.21836	3.89139	7.12974
NLJP02 S 231 1/13/2016 2:40:40 AM (Run: 1)			66.7381	52.8401	25.6998	0.791754	617.362		0.0910903	5.25654	10.1151	2.85487	3.87659	4.25326	0.284394	3.15277	0.74126	3.51625	3.15277	0.0988617	2.85487	0		1762.04	88.7	1602.75	53.2508	1608.82	34.3309	1613.45	45.0021		-0.667592	-0.288012	0.002	0.00427895	0.00448315	0.0013869		127.603	3.81961	1635.94	565211	5.19445		6.76153	0.183438	5.06532	10.5124
NLJP02 M 219 1/13/2016 2:12:43 AM (Run: 1)			167.404	84.6286	61.2051	0.505536	2025.64		0.10156	4.59379	9.72528	1.65813	4.03968	3.51524	0.284937	3.0996	0.88176	3.50955	3.0996	0.102825	1.65813	3.45665e-16		1955.06	85.6044	1675.72	30.6397	1642.22	28.6107	1616.18	44.3088		3.55318	1.58607	0.002	0.00420952	0.00441594	0.000808162		132.137	12.469	720.701	522263	1.69149		15.005	0.0523855	0.80071	4.10942
NLJP02 L 205 1/13/2016 1:34:20 AM (Run: 1)			97.855	64.4558	37.8943	0.658687	4913.53		0.101948	5.48824	9.65477	2.08566	4.13868	4.27619	0.289803	3.73307	0.87299	3.45062	3.73307	0.103576	2.08566	0		1962.18	102.627	1689.15	38.4739	1661.97	34.9701	1640.54	54.0709		2.87762	1.28955	0.002	0.00523727	0.00540927	0.00104495		104.619	16.0055	484.145	522342	1.41475		16.3169	0.0300826	0.859999	1.53839
NLJP02 L 206 1/13/2016 1:36:03 AM (Run: 1)			42.2727	47.1145	18.2698	1.11454	3650.35		0.100538	6.25605	9.90939	2.98672	4.039	4.85876	0.290282	3.83236	0.788753	3.44493	3.83236	0.100914	2.98672	0		1936.31	115.515	1640.99	55.4356	1642.09	39.5444	1642.94	55.5802		-0.118645	-0.0518489	0.002	0.0053943	0.00556232	0.00148329		153.787	21.5841	885.827	515760	1.05269		35.3038	0.114424	3.12259	6.19329
NLJP02 S 243 1/13/2016 3:05:04 AM (Run: 1)			58.0353	73.4571	25.2232	1.26573	1129.79		0.0811246	8.38171	9.82362	3.24738	4.22166	5.7793	0.300783	4.78067	0.827205	3.32465	4.78067	0.101796	3.24738	2.29212e-16		1576.58	127.122	1657.12	60.1485	1678.24	47.4438	1695.19	71.2616		-2.29721	-1.01	0.002	0.00704831	0.00718972	0.00163095		146.885	35.0167	1598.21	675820	3.34689	0.033595	29.2095	0.382863	5.97013	9.01006
NLJP02 M 212 1/13/2016 1:53:34 AM (Run: 1)			57.2778	107.407	30.8923	1.8752	575.988		0.104782	6.39967	9.75137	2.4209	4.38985	5.26816	0.310466	4.67897	0.88816	3.22096	4.67897	0.10255	2.4209	1.57072e-16		2014.11	122.682	1670.78	44.7623	1710.43	43.5674	1743	71.459		-4.32273	-1.9042	0.002	0.00711643	0.00726331	0.00121145
DISCORDANT ANALYSES
NLJP02 L 143 1/12/2016 11:05:07 PM (Run: 1)			20.869	15.5031	5.14523	0.742876	115.105		0.0563285	10.874	13.8557	7.49464	1.89569	8.9282	0.1905	4.85213	0.543461	5.24935	4.85213	0.0721725	7.49464	1.95827e-16		1107.61	117.201	990.829	152.415	1079.58	59.3484	1124.08	50.0513		-13.4486	-4.12219	0.002	0.00453665	0.00462164	0.0026979		125.014	33.4301	453.381	570280	1.49457		10.7863	0.0555957	0.614073	2.14361
NLJP02 L 144 1/12/2016 11:06:51 PM (Run: 1)			20.2454	13.6597	5.09423	0.674707	238.89		0.0592609	10.6832	10.9388	5.67571	2.43877	8.53293	0.193482	6.37159	0.746706	5.16845	6.37159	0.0914177	5.67571	0		1163.64	120.804	1455.32	107.957	1254.11	61.4463	1140.21	66.587		21.6524	9.08263	0.002	0.00609843	0.00616392	0.0025832		113.554	6.8706	657.698	558574	1.15642	0.0215869	8.83515	0.0653126	0.754405	2.73091
NLJP02 L 166 1/12/2016 11:58:52 PM (Run: 1)			37.0894	35.3256	8.51497	0.952443	286.433		0.0573518	8.93689	14.7332	7.01118	1.53004	10.8993	0.163492	8.34489	0.765638	6.1165	8.34489	0.067874	7.01118	0		1127.18	97.9775	864.716	145.402	942.513	66.9271	976.155	75.5915		-12.8875	-3.56944	0.002	0.00677926	0.00682163	0.00237267		117.234	18.5355	488.868	542368	1.8753		10.9227	0.0766877	1.16261	3.51116
NLJP02 L 169 1/13/2016 12:11:07 AM (Run: 1)			57.4504	34.3186	12.5453	0.597361	717.005		0.0614308	5.8628	12.4216	5.48047	1.86277	7.17767	0.167818	4.63502	0.645756	5.95885	4.63502	0.0805046	5.48047	-1.40123e-16		1205	68.5824	1209.37	107.893	1067.97	47.4227	1000.08	42.9371		17.3062	6.35732	0.002	0.00381026	0.00388919	0.0021958		122.869	11.8932	463.218	560052	4.80763		26.3524	0.11067	0.758997	2.64689
NLJP02 L 183 1/13/2016 12:42:17 AM (Run: 1)			10.475	9.46442	2.346	0.903523	94.4425		0.0535795	13.0334	16.7119	12.7913	1.36342	13.9368	0.165255	5.53312	0.397016	6.05125	5.53312	0.0598376	12.7913	-2.01254e-16		1054.94	133.968	597.71	277.049	873.342	81.636	985.915	50.5851		-64.9488	-12.8899	0.002	0.00450664	0.00457189	0.00382376		129.165	39.9152	451.083	580768	1.43783		21.3954	0.0435221	1.55526	3.76696
NLJP02 L 190 1/13/2016 1:01:26 AM (Run: 1)			23.4514	20.839	5.53144	0.888603	290.99		0.0610441	10.7184	12.0959	7.8104	1.90799	9.32051	0.167384	5.0862	0.5457	5.9743	5.0862	0.0826727	7.8104	0		1197.64	124.638	1261.5	152.616	1083.88	62.0944	997.68	47.0123		20.913	7.95325	0.002	0.00418458	0.00425674	0.00322116		122.212	21.0788	429.649	545178	1.36578		13.5069	0.0955264	1.06399	3.0443
NLJP02 L 194 1/13/2016 1:08:19 AM (Run: 1)			97.4997	80.1228	26.0448	0.821775	2576.42		0.069998	4.82224	13.8348	2.62877	1.9453	4.38172	0.19519	3.50557	0.800045	5.12321	3.50557	0.0722816	2.62877	1.93041e-16		1367.49	63.7623	993.896	53.4353	1096.83	29.3854	1149.43	36.9061		-15.649	-4.7958	0.002	0.00329805	0.00342127	0.000930718		161.07	21.2239	909.351	508379	3.53396	0.0311213	27.9926	0.212803	3.22615	6.46086
NLJP02 L 203 1/13/2016 1:30:53 AM (Run: 1)			9.7128	17.356	2.68083	1.78692	136.536		0.0540904	8.20955	14.72	8.14222	1.56947	9.94164	0.167556	5.70443	0.573791	5.96816	5.70443	0.0679348	8.14222	-3.06672e-16		1064.74	85.148	866.548	168.811	958.216	61.6591	998.63	52.7731		-15.2424	-4.21762	0.002	0.00471443	0.00477905	0.00275988		99.9831	9.4071	763.764	540571	1.2287	0.03081	24.9964	0.351124	4.81156	10.0089
NLJP02 L 204 1/13/2016 1:32:37 AM (Run: 1)			10.2887	11.7798	2.56652	1.14493	103.985		0.0610269	10.2914	14.8314	12.5472	1.56039	13.5289	0.167847	5.05937	0.373968	5.95782	5.05937	0.0674247	12.5472	2.24379e-16		1197.31	119.642	850.898	260.784	954.621	83.7179	1000.24	46.875		-17.5506	-4.77824	0.002	0.00417284	0.00424599	0.00422622		146.319	49.439	509.564	538237	1.30485		17.4777	0.0776958	2.25918	4.09335
NLJP02 M 217 1/13/2016 2:02:10 AM (Run: 1)			10.806	9.82547	2.4312	0.909263	238.959		0.0604586	11.4052	11.8803	8.47552	1.81573	9.99433	0.156451	5.29645	0.529945	6.39178	5.29645	0.0841726	8.47552	-1.58653e-16		1186.48	131.426	1296.53	164.793	1051.14	65.4401	937.024	46.1906		27.7283	10.8569	0.002	0.00407772	0.00414317	0.00356011		151.776	37.2763	503.424	531970	1.48202	0.0508462	20.6484	0.118337	2.71476	4.1625
NLJP02 M 218 1/13/2016 2:03:53 AM (Run: 1)			10.9102	13.7152	3.00943	1.2571	81.6961		0.0705238	7.89382	12.0815	11.1683	1.96834	12.3216	0.172472	5.205	0.422428	5.79804	5.205	0.0827714	11.1683	0		1377.42	105.109	1263.81	218.16	1104.74	82.9629	1025.72	49.3577		18.8392	7.15308	0.002	0.00441512	0.00448858	0.0046169		211.01	49.0413	934.512	536754	1.35487		15.6934	0.243612	3.47377	7.99281
NLJP02 M 226 1/13/2016 2:24:47 AM (Run: 1)			13.9158	11.7837	3.04023	0.846785	91.631		0.0447126	10.9056	14.4587	7.73032	1.60723	9.41823	0.168542	5.38007	0.57124	5.93325	5.38007	0.0691624	7.73032	1.71238e-16		884.115	94.3396	903.558	159.345	973.031	58.952	1004.07	50.023		-11.1241	-3.1901	0.002	0.00446412	0.00453383	0.00266701		167.638	36.7684	750.834	638238	1.86311		15.5844	0.116542	2.67359	4.76383
NLJP02 S 244 1/13/2016 3:06:46 AM (Run: 1)			11.9333	18.5186	3.37157	1.55184	303.39		0.0533519	10.8929	11.6143	5.66347	2.17823	7.53853	0.183483	4.9754	0.659996	5.4501	4.9754	0.0861006	5.66347	-1.26372e-16		1050.57	111.515	1340.46	109.438	1174.11	52.4608	1085.97	49.7255		18.9848	7.50674	0.002	0.00448153	0.0045645	0.00242757		150.603	48.8447	987.204	676460	0.630029	0.0313423	7.90287	0.182362	3.83365	7.45429
NLJP02 M 221 1/13/2016 2:16:09 AM (Run: 1)			8.76878	17.1366	2.60147	1.95427	87.6138		0.0615425	8.55787	12.4741	13.1288	1.8009	14.5818	0.162928	6.34535	0.435156	6.13766	6.34535	0.0801661	13.1288	1.70985e-16		1207.13	100.28	1201.09	258.772	1045.78	95.199	973.03	57.3083		18.9878	6.9568	0.002	0.00511227	0.00516919	0.00525817
NLJP02 L 139 1/12/2016 10:58:15 PM (Run: 1)			9.54056	12.7004	2.34646	1.3312	2377.28		0.0540297	11.951	12.6785	11.0251	1.75005	12.5636	0.160923	6.02417	0.479495	6.21414	6.02417	0.0788734	11.0251	0		1063.58	123.822	1168.94	218.329	1027.18	81.1807	961.905	53.8308		17.7116	6.35482	0.002	0.00478953	0.00484715	0.00434302		98.3102	30.7529	541.888	618469	0.857526		17.2954	0.115888	1.30318	2.82595
NLJP02 S 255 1/13/2016 3:29:26 AM (Run: 1)			13.3438	24.0622	3.52368	1.80325	80.3007		0.0501882	8.28017	14.6529	12.227	1.52537	13.2874	0.162105	5.2013	0.391447	6.16885	5.2013	0.0682459	12.227	2.23968e-16		989.776	79.9808	876.062	253.116	940.637	81.4927	968.463	46.7715		-10.5473	-2.95829	0.002	0.00414531	0.00421578	0.00416837		215.592	50.7103	946.378	612289	1.47178	0.0418384	28.7198	0.358386	8.61115	13.7615
NLJP02 S 269 1/13/2016 4:01:04 AM (Run: 1)			24.4636	34.9758	5.00224	1.42971	79.033		0.0423057	7.68034	13.793	6.5215	1.33909	7.95466	0.133958	4.55486	0.572602	7.46505	4.55486	0.0725005	6.5215	0		837.496	63.0081	1000.05	132.439	862.834	46.2397	810.403	34.6868		18.9634	6.07658	0.002	0.00298355	0.00305079	0.00235639		152.948	10.407	1231.67	666865	2.55872	0.114449	34.2443	1.00195	13.8544	17.7148
NLJP02 S 246 1/13/2016 3:10:13 AM (Run: 1)			51.3279	25.6962	9.40052	0.500628	549.769		0.0454189	9.20053	13.6918	4.99629	1.50234	7.99363	0.149186	6.23981	0.780597	6.70305	6.23981	0.0730366	4.99629	-1.1419e-16		897.776	80.7925	1014.96	101.236	931.338	48.73	896.398	52.2188		11.6815	3.75156	0.002	0.00460082	0.00465445	0.0018144		121.28	13.2209	532.163	680328	4.13096		24.727		1.11728	2.07608
NLJP02 L 151 1/12/2016 11:25:58 PM (Run: 1)			16.8281	21.6196	3.80057	1.28474	75.0108		0.0487541	9.15071	13.6355	6.93894	1.53409	7.5442	0.151712	2.96077	0.392457	6.59144	2.96077	0.0733381	6.93894	-1.73322e-16		962.157	85.9815	1023.33	140.418	944.138	46.3737	910.553	25.142		11.0204	3.55723	0.002	0.00213296	0.00224592	0.00253714		168.25	31.8817	790.055	576626	3.60882		35.5893	0.218473	3.01638	6.99863
NLJP02 L 141 1/12/2016 11:01:41 PM (Run: 1)			6.36598	3.05836	1.25129	0.480423	16.6878		0.0645011	18.728	13.1904	11.6558	1.60497	13.6713	0.153541	7.14456	0.522597	6.51293	7.14456	0.0758126	11.6558	0		1263.38	229.363	1090.13	233.517	972.148	85.5268	920.78	61.3034		15.5347	5.28392	0.002	0.00543861	0.0054849	0.00441383		56.5649	3.96337	442.075	581424	1.49471	0.0587521	6.41285	0.138052	1.96476	3.8154
Jan 12th, 2016
Isotope ratio and date errors include systematic calibration errors of 0.53% (207Pb/206Pb) and 0.93% (206Pb/238U) (all 2-sigma).
Trace element concentrations were deleted from analyses known to have intersected inclusions of other minerals based on P and Ti.
Ablation used a laser spot size of 25 microns, and a laser firing repetition rate of 10 Hz.
Activity of TiO2 for Ti-in-Zircon temperature calculation is 0.8.
Jan 1st, 2018 Experiment 1
Isotope ratio and date errors include systematic calibration errors of 0.31% (207Pb/206Pb) and 1.49% (206Pb/238U) (all 2-sigma).
Trace element concentrations were deleted from analyses known to have intersected inclusions of other minerals based on P and Ti.
Ablation used a laser spot size of 25 microns, and a laser firing repetition rate of 10 Hz.
Activity of TiO2 for Ti-in-Zircon temperature calculation is 0.8.
CP1803 Paragneiss, Little Codroy Pond (47.83275° N, 59.07766° W)
Metamorphic
CP1803 S 177 8/20/2019 2:51:23 AM (Run: 1)		m - dp	236.463	3.32386	16.5902	0.0140566	683.681		0.0508846	25.9394	18.1055	4.6108	0.509676	5.22875	0.0669273	2.46584	0.454414	14.9416	2.46584	0.0552319	4.6108	1.5363e-16		1003.17	253.865	421.644	102.919	418.231	17.9241	417.617	9.97129		0.955054	0.146948	412.516	10.1794	409.625	24.5162		100.367	0.759452	77.6219	448279	0.0958725		0.263627
CP1803 S 187a 8/20/2019 3:15:01 AM (Run: 1)		m - dp	322.112	2.87922	23.6987	0.00893857	351.854		0.0961465	49.2057	17.303	12.2449	0.554646	13.022	0.0696042	4.43136	0.336457	14.367	4.43136	0.0577936	12.2449	0		1855.49	872.355	521.966	268.631	448.036	47.173	433.77	18.5895		16.8967	3.18394	443.76	19.1219	426.639	19.501		37.3855	1.57108	80.4516	442050	0.363384	0.100905	0.253613			0.214522
CP1803 S 226 8/20/2019 5:03:26 AM (Run: 1)		m - bfir	11.6424	0.215267	0.860251	0.01849	9.01922		0.366092	59.29	16.7041	23.1412	0.534962	24.3818	0.0648103	7.67854	0.313761	15.4297	7.67854	0.0598656	23.1412	-3.12592e-16		6305.27	3211.47	598.735	501.129	435.097	86.2822	404.813	30.1279		32.3886	6.96031	427.459	30.966	377.212	49.9654		92.1944		184.123	446105	0.351123
CP1803 S 229 8/20/2019 5:17:21 AM (Run: 1)		m - dp	1217.03	92.0687	85.1634	0.0756503	0		0.0232809	22.696	17.2523	10.3852	0.511878	11.0444	0.0640491	3.75825	0.33504	15.613	3.75825	0.0579632	10.3852	-1.83267e-16		465.163	104.368	528.364	227.589	419.712	37.9682	400.203	14.5833		24.2561	4.64799	422.308	14.9619	402.102	156.515		120.001	4.44825	34.5427	468679	0.621879	0.0676048	0.222436		0.383402
CP1803 S 235 8/20/2019 5:29:04 AM (Run: 1)		m - dp	572.12	46.0791	88.7129	0.080541	3053.75		0.0440399	7.84989	14.3496	2.54944	1.34583	4.17601	0.140065	3.30749	0.776304	7.13954	3.30749	0.0696884	2.54944	0		871.098	66.9277	919.165	52.4237	865.758	24.3269	845.03	26.1949		8.06547	2.3941	872.49	26.9659	853.75	152.81		160.345	3.2794	691.062	472875	7.51094		7.86356		0.439892	1.66153
CP1803 S 251 8/20/2019 6:16:21 AM (Run: 1)		m - dp	74.8473	3.93875	5.48372	0.0526238	67.4709		0.0316904	39.5114	16.9563	8.2268	0.561674	9.34283	0.0690738	4.42812	0.468794	14.4773	4.42812	0.0589753	8.2268	1.90915e-16		630.591	245.309	566.21	179.131	452.616	34.1195	430.573	18.4435		23.9553	4.87001	445.2	18.7437	420.121	114.294		107.557	0.0348588	21.4112	483617	0.191811		0.0738122
CP1803 S 252 8/20/2019 6:18:18 AM (Run: 1)		m - bfir	46.9404	3.73718	3.21077	0.0796154	17.2669		0.0313299	26.8836	16.9422	12.9182	0.517875	14.1652	0.0636345	5.81149	0.407673	15.7148	5.81149	0.0590244	12.9182	0		623.527	165.067	567.966	281.204	423.731	49.0728	397.691	22.4133		29.9798	6.14545	416.493	22.8051	386.414	181.619		89.2339	0.619498	168.35	457141	0.214095		0.00504912
CP1803 S 254 8/20/2019 6:22:12 AM (Run: 1)		m - dp	237.028	3.46923	16.8982	0.0146364	185.561		0.0663703	33.3256	18.6792	7.40745	0.501089	7.69677	0.0678846	2.09047	0.258354	14.7309	2.09047	0.0535355	7.40745	2.25584e-16		1298.85	419.234	351.565	167.393	412.439	26.0884	423.398	8.56659		-20.4325	-2.65716	406.589	8.93636	414.6	25.9107		132.567	0.764545	70.7698	446698	0.156136	0.0640578	0.775825	0.0888102	0.323761	0.45082
CP1803 XS 33 8/22/2019 4:23:33 PM (Run: 1)		m - dp	264.164	11.0262	20.3446	0.0417402	2673.1		0.0387677	17.7805	17.4665	4.96437	0.558236	6.38733	0.0707167	4.01908	0.617291	14.1409	4.01908	0.0572525	4.96437	3.5913e-16		768.771	134.124	501.281	109.296	450.378	23.2345	440.472	17.1117		12.1306	2.19939	453.587	17.3553	442.072	87.8008		94.401	2.20879	94.07	505827	0.421018	13.9827	23.3098	4.30884	33.8501	9.38509
CP1803 S 207 8/20/2019 4:10:11 AM (Run: 1)		m - dp	137.154	20.0044	9.39796	0.145854	53.9057		0.0229453	28.9046	17.1844	17.6949	0.504025	20.0521	0.0628182	9.43271	0.469244	15.9189	9.43271	0.0581923	17.6949	1.66953e-16		458.532	131.045	537.035	387.199	414.424	68.2317	392.742	35.9403		26.8685	5.23176	408.104	36.465	383.69	227.913		92.6232		45.0554	417065	0.269406		0.402207	0.0547808
CP1803 S 242 8/20/2019 5:50:45 AM (Run: 1)		m - dp	142.28	105.179	11.858	0.739243	142.988		0.0214406	6.45218	18.1063	5.33672	0.496725	6.03993	0.0652295	2.82846	0.455672	15.3305	2.82846	0.0552294	5.33672	2.30783e-16		428.781	27.3744	421.499	119.127	409.483	20.3533	407.351	11.1653		3.35663	0.520644	402.958	11.3912	396.14	1849.98		101.53	2.21601	95.8863	466837	0.0551366		0.456993
CP1803 S 230 8/20/2019 5:19:18 AM (Run: 1)		m - dp	313.133	116.914	24.0208	0.373368	1837.43		0.0226787	7.57162	17.4938	5.73622	0.516364	6.42536	0.0655149	2.89499	0.438855	15.2637	2.89499	0.057163	5.73622	0		453.264	33.9375	497.809	126.366	422.72	22.2167	409.078	11.4748		17.8244	3.22725	417.858	11.6851	400.372	444.766		149.988	1.70427	28.8189	466027	0.0992249		0.185701			0.229719
CP1803 S 218 8/20/2019 4:39:46 AM (Run: 1)		m - dp	147.443	55.0584	11.1085	0.373422	141.816		0.0201455	13.4744	18.8283	7.50925	0.480844	8.12468	0.0656619	3.10187	0.373068	15.2295	3.10187	0.0531116	7.50925	0		403.137	53.7821	333.568	170.237	398.652	26.7874	409.967	12.3207		-22.9034	-2.83832	392.126	12.6716	402.27	634.355		89.6704	1.0527	71.6462	464533	0.125781		0.459126
CP1803 S 174 8/20/2019 2:45:31 AM (Run: 1)		m - dp	499.635	133.33	37.3196	0.266855	1415.79		0.0217477	6.80905	17.5694	4.10227	0.516244	4.79256	0.0657826	2.47791	0.498388	15.2016	2.47791	0.0569171	4.10227	0		434.857	29.2934	488.349	90.516	422.64	16.5685	410.697	9.85931		15.901	2.82571	419.663	10.0153	405.926	424.347		90.8527	2.47101	76.8147	459134	0.235569		0.509162
CP1803 S 180 8/20/2019 3:01:21 AM (Run: 1)		m - dp	244.809	63.6675	18.3427	0.26007	459.351		0.0223668	10.5539	17.3617	5.34563	0.52753	5.78031	0.066426	2.19914	0.363025	15.0543	2.19914	0.057598	5.34563	0		447.1	46.6685	514.486	117.426	430.169	20.2693	414.588	8.83038		19.4171	3.62217	424.703	9.0341	406.511	552.045		59.8577	1.82427	74.605	450365	0.0663372	0.0613434	0.91886		0.306737	0.427114
CP1803 S 202 8/20/2019 4:00:25 AM (Run: 1)		m - dp	232.249	29.1696	16.6797	0.125596	771.957		0.0189777	14.469	17.0227	4.73709	0.539997	5.51745	0.066668	2.82881	0.498545	14.9997	2.82881	0.0587452	4.73709	1.30401e-16		379.986	54.4667	557.7	103.294	438.422	19.6444	416.05	11.3975		25.399	5.10289	432.961	11.5539	410.033	294.365		31.0506	1.29045	47.1043	424899	0.0951496	0.139488	1.25243	0.0533994	0.295655
CP1803 S 168 8/20/2019 2:25:47 AM (Run: 1)		m - dp	632.776	226.176	49.5299	0.357435	1449.21		0.0228204	6.43664	17.5067	3.66174	0.525172	4.309	0.0666812	2.27137	0.50454	14.9967	2.27137	0.0571211	3.66174	-2.12447e-16		456.065	29.0265	496.22	80.6874	428.6	15.0657	416.13	9.15324		16.1401	2.90962	426.946	9.29525	411.682	642.58		127.018	3.35756	82.9148	449566	0.184621	1.70438	4.83983	1.13536	8.25731	3.28304
CP1803 S 274 8/20/2019 7:05:20 AM (Run: 1)		m - dp	172.568	99.5089	14.1919	0.576636	342.822		0.0228571	7.75025	18.6725	3.42145	0.492863	4.65447	0.0667462	3.1556	0.663728	14.9821	3.1556	0.0535548	3.42145	-1.61575e-16		456.79	35.0053	352.412	77.3049	406.859	15.6029	416.523	12.7282		-18.192	-2.37509	400.693	12.9622	404.911	14.3706		114.053	1.77975	41.9928	456128	0.0684327		0.179671			0.0176364
CP1803 S 222 8/20/2019 4:55:37 AM (Run: 1)		m - dp	80.6133	32.0648	6.17112	0.39776	376.018		0.0194896	20.7851	18.969	6.3338	0.485222	7.59275	0.0667551	4.18722	0.54459	14.9801	4.18722	0.0527175	6.3338	-1.31148e-16		390.138	80.3131	316.674	144.02	401.649	25.1871	416.577	16.8913		-31.5475	-3.71651	394.451	17.2667	409.214	936.796		140.086	1.68819	81.568	491786	0.197564		0.512323			0.113854
CP1803 S 203 8/20/2019 4:02:23 AM (Run: 1)		m - dp	368.044	175.026	29.5937	0.475557	641.634		0.0223205	5.45547	17.6696	4.41299	0.521934	5.6096	0.0668867	3.4631	0.60598	14.9506	3.4631	0.0565945	4.41299	1.14788e-16		446.184	24.0747	475.766	97.5844	426.443	19.5336	417.372	13.996		12.2737	2.12705	422.255	14.1948	409.82	1088.17		120.864	1.80544	41.01	418984	0.27807		0.243127			0.142443
CP1803 M 10 8/19/2019 6:59:00 PM (Run: 1)		m - dp	1203.63	130.631	92.2946	0.108531	55225.8		0.0425255	10.0456	15.976	4.18236	0.577356	6.33767	0.0668977	4.76171	0.743116	14.9482	4.76171	0.0625938	4.18236	0		841.759	82.823	694.471	89.1435	462.761	23.5545	417.438	19.2473		39.8912	9.79406	468.538	19.2705	416.209	179.278		156.783	3.4357	205.488	378530	0.469252	7.4404	13.5383	2.27007	13.2214	2.34684
CP1803 S 234 8/20/2019 5:27:06 AM (Run: 1)		m - dp	233.04	112.6	18.617	0.483178	125.316		0.0216402	5.34169	18.2007	6.06253	0.50712	6.69134	0.066942	2.83192	0.411759	14.9383	2.83192	0.0549428	6.06253	-2.03448e-16		432.73	22.8694	409.903	135.602	416.51	22.8615	417.706	11.454		-1.90341	-0.286934	410.741	11.7263	409.237	1107.83		137.914	1.57548	28.5847	463489	0.200389		0.139498
CP1803 S 247 8/20/2019 6:00:30 AM (Run: 1)		m - dp	162.084	97.7472	13.7555	0.603066	242.058		0.0253461	6.45765	16.9897	6.25941	0.543505	6.65116	0.0669711	2.24894	0.323761	14.9318	2.24894	0.0588592	6.25941	-2.47637e-16		505.915	32.2647	561.902	136.393	440.733	23.7806	417.882	9.09979		25.6309	5.1848	434.361	9.34059	401.026	856.157		124.832	2.35579	79.9787	468252	0.218633	1.00137	2.00918	0.324533	2.05298	1.002
CP1803 S 173 8/20/2019 2:43:34 AM (Run: 1)		m - dp	279.979	91.3036	21.7119	0.326109	638.179		0.0236642	7.54984	17.2905	3.52176	0.534596	4.6489	0.0670396	3.03471	0.637088	14.9166	3.03471	0.0578353	3.52176	-1.63664e-16		472.732	35.2764	523.542	77.2407	434.855	16.4442	418.295	12.291		20.1029	3.80812	429.693	12.4336	409.06	744.601		117.88	1.71836	19.2342	454765	0.268274		0.305319
CP1803 S 231 8/20/2019 5:21:15 AM (Run: 1)		m - dp	312.699	49.9234	22.9612	0.159653	1901.45		0.0219743	11.5013	17.3501	3.37896	0.533194	4.0012	0.0670942	2.14295	0.510205	14.9044	2.14295	0.0576367	3.37896	2.41724e-16		439.339	49.9845	515.995	74.2042	433.927	14.1289	418.625	8.68587		18.8703	3.5263	428.984	8.81447	412.044	313.806		80.1874	1.14392	36.3483	470911	0.143371		0.333136
CP1803 S 245 8/20/2019 5:56:36 AM (Run: 1)		m - dp	121.281	85.0143	10.2474	0.70097	60.5111		0.0210625	7.79692	16.7199	6.88663	0.553653	7.3055	0.0671384	2.43816	0.321661	14.8946	2.43816	0.0598089	6.88663	0		421.298	32.5083	596.685	149.183	447.387	26.434	418.892	9.88848		29.7968	6.36916	440.563	10.1467	409.566	1235.37		133.984	2.39787	26.3562	461377	0.256655	0.0415139	0.31302
CP1803 M 15 8/19/2019 7:16:47 PM (Run: 1)		m - dp	117.527	34.3566	8.99209	0.292329	30.7597		0.021657	17.163	17.0228	9.92037	0.543806	10.246	0.0671387	2.56272	0.240717	14.8945	2.56272	0.0587449	9.92037	8.2781e-16		433.061	73.5355	557.621	216.326	440.931	36.6469	418.894	10.3937		24.8783	4.99781	436.724	10.8633	412.88	629.818		58.8207	3.00152	59.3731	400620	0.0582721		0.499166
CP1803 S 238 8/20/2019 5:34:55 AM (Run: 1)		m - dp	503.266	150.795	39.4524	0.299634	0		0.0258887	5.04484	16.2806	4.05489	0.568882	4.66623	0.0671725	2.30902	0.474723	14.887	2.30902	0.0614228	4.05489	5.63883e-16		516.608	25.7318	654.087	87.0036	457.291	17.1802	419.098	9.36919		35.9262	8.35197	454.444	9.46882	410.687	563.609		104.845	1.98314	57.6367	450470	0.150558	0.543151	1.75917	0.425956	2.98578	0.944775
CP1803 S 206 8/20/2019 4:08:14 AM (Run: 1)		m - dp	371.271	96.4494	28.7955	0.259782	1995.32		0.026723	12.6326	17.0348	7.26839	0.545809	9.68802	0.0674335	6.40532	0.657601	14.8294	6.40532	0.0587035	7.26839	-3.01926e-16		533.037	66.4565	556.137	158.532	442.248	34.7336	420.675	26.0852		24.3577	4.87796	438.686	26.348	411.642	458.161		146.761	1.9915	137.982	420746	0.315113		1.39127		0.103208
CP1803 M 11 8/19/2019 7:08:59 PM (Run: 1)		m - dp	406.827	94.0491	31.1043	0.231177	4096.15		0.0239905	5.8225	17.7597	3.65153	0.524587	4.59823	0.0675695	2.79464	0.588515	14.7996	2.79464	0.0563074	3.65153	1.7294e-16		479.174	27.5718	464.487	80.9043	428.211	16.0652	421.496	11.4024		9.25567	1.56812	426.045	11.5744	416.734	445.427		95.0136	2.13853	30.4629	376915	0.296326	0.56752	1.30634	0.265116	2.21157	0.572834
CP1803 S 192 8/20/2019 3:32:50 AM (Run: 1)		m - dp	112.323	91.8469	10.1626	0.8177	144.353		0.0252692	6.06525	19.2605	6.37924	0.484736	7.3335	0.0677129	3.6174	0.484923	14.7682	3.6174	0.0519197	6.37924	1.50896e-16		504.399	30.2144	281.884	145.96	401.317	24.3107	422.362	14.7888		-49.8352	-5.24411	394.397	15.1681	401.99	2019.44		128.494	2.38955	17.7577	438323	0.164389		0.246183
CP1803 S 186 8/20/2019 3:13:04 AM (Run: 1)		m - dp	449.984	133.759	34.9851	0.297252	191.335		0.0222837	5.33434	17.5084	3.59391	0.535131	4.83503	0.0679524	3.2344	0.654783	14.7162	3.2344	0.0571155	3.59391	-1.51306e-16		445.455	23.5022	496	79.1958	435.209	17.1137	423.807	13.2667		14.555	2.61978	431.888	13.437	418.587	474.262		57.3958	2.16469	20.1577	443148	0.188015		0.146746	0.00986405
CP1803 S 236 8/20/2019 5:31:01 AM (Run: 1)		m - dp	926.968	158.105	70.7787	0.170562	509.744		0.0244694	7.35121	17.2458	3.50119	0.543316	4.13488	0.067957	2.19975	0.508147	14.7152	2.19975	0.0579853	3.50119	-2.31554e-16		488.624	35.4891	529.181	76.7172	440.609	14.7806	423.835	9.02345		19.9074	3.80691	442.273	9.15376	423.845	211.531		71.9644	2.26017	60.8769	450207	0.513752	0.787443	1.39546	0.144963	1.28417	0.609713
CP1803 S 258 8/20/2019 6:30:01 AM (Run: 1)		m - dp	516.327	159.463	40.139	0.308841	500.024		0.0214515	6.26863	18.0657	3.55957	0.518985	4.26316	0.0679999	2.34605	0.52906	14.7059	2.34605	0.0553535	3.55957	-2.10788e-16		428.997	26.6088	426.528	79.3872	424.473	14.7898	424.094	9.62924		0.570492	0.0891967	421.343	9.80563	419.972	319.469		103.767	2.63151	27.1268	459465	0.446769		0.112622
CP1803 S 163 8/20/2019 2:16:01 AM (Run: 1)		m - dp	142.308	39.2103	11.2266	0.27553	87.8539		0.0285348	11.1627	16.1495	4.3905	0.582244	5.23286	0.0681968	2.84716	0.529275	14.6634	2.84716	0.0619213	4.3905	1.39371e-16		568.674	62.595	671.404	93.9353	465.903	19.5524	425.283	11.7177		36.6577	8.71856	459.314	11.8172	411.009	641.454		72.429	1.55275	60.6469	450201	0.160201	0.160735	0.898626	0.0501025	0.794839
CP1803 S 181 8/20/2019 3:03:18 AM (Run: 1)		m - dp	1082.45	134.136	81.7527	0.12392	954.18		0.0216853	6.39045	18.0955	2.34137	0.521559	3.75626	0.0684498	2.93725	0.761881	14.6092	2.93725	0.0552624	2.34137	-3.90695e-16		433.622	27.4153	422.816	52.253	426.192	13.0737	426.81	12.1305		-0.944497	-0.144866	429.09	12.3042	430.212	88.1026		53.294	2.43712	43.466	454321	0.253964	1.2436	2.97728	0.841589	4.6063	0.705029
CP1803 S 171 8/20/2019 2:39:40 AM (Run: 1)		m - dp	520.207	184.014	41.5346	0.353733	1824.16		0.0208319	4.20874	18.3402	3.16239	0.520726	4.32017	0.0692646	2.94332	0.663894	14.4374	2.94332	0.0545251	3.16239	0		416.733	17.3596	392.776	70.9472	425.636	15.0206	431.724	12.2909		-9.91607	-1.43023	422.843	12.508	429.113	793.409		41.5068	1.98544	29.4254	442817	0.0834102		0.109761
CP1803 S 219 8/20/2019 4:49:45 AM (Run: 1)		m - dp	680.124	97.8983	51.9273	0.143942	248.522		0.0232957	9.10946	17.7811	1.96273	0.537877	3.42194	0.0693649	2.8031	0.796301	14.4165	2.8031	0.0562396	1.96273	-1.60842e-16		465.455	41.916	461.816	43.5069	437.024	12.1525	432.328	11.7212		6.38515	1.07445	435.792	11.874	430.048	288.693		84.8076	2.2818	47.3044	464905	0.0492251	4.5574	10.4067	1.84864	11.2422	0.727985
CP1803 S 165 8/20/2019 2:19:55 AM (Run: 1)		m - dp	482.985	169.846	38.8815	0.351658	220.989		0.0223567	5.75892	17.7934	2.81696	0.53762	3.72716	0.0693798	2.44058	0.630529	14.4134	2.44058	0.0562006	2.81696	-1.28064e-16		446.899	25.4541	460.301	62.4579	436.854	13.2323	432.418	10.2074		6.05753	1.01545	433.833	10.3634	427.796	570.48		41.1522	2.58999	29.0283	437217	0.271759		0.178182
CP1803 S 200 8/20/2019 3:56:31 AM (Run: 1)		m - dp	792.103	157.368	61.9065	0.198671	685.896		0.0223462	5.44037	17.4944	2.09953	0.547802	3.69321	0.069506	3.03839	0.802994	14.3872	3.03839	0.0571611	2.09953	1.39678e-16		446.692	24.0351	497.778	46.251	443.556	13.2722	433.179	12.7292		12.9776	2.33953	444.864	12.8724	434.162	412.804		60.4504	2.79644	29.8449	437546	0.413902	0.100643	0.324065	0.0367998	0.417533
CP1803 S 178 8/20/2019 2:53:20 AM (Run: 1)		m - dp	160.48	48.8197	12.7158	0.304211	2354.95		0.0227434	11.5911	18.1099	6.38703	0.531607	6.94604	0.0698241	2.73008	0.381361	14.3217	2.73008	0.0552185	6.38703	0		454.542	52.0986	421.101	142.58	432.876	24.48	435.096	11.4865		-3.32335	-0.512841	426.324	11.7947	426.05	491.07		23.441	1.09729	93.5917	441006	0.0157669		0.42925
CP1803 S 215a 8/20/2019 4:33:53 AM (Run: 1)		m - dp	779.995	81.623	60.4731	0.104646	707.696		0.0316267	24.6992	17.1658	8.63772	0.563588	11.8366	0.0701657	8.09284	0.681419	14.252	8.09284	0.0582553	8.63772	0		629.343	153.048	539.387	188.936	453.859	43.3206	437.154	34.2053		18.9537	3.68076	453.95	34.5984	433.982	205.463		170.451	6.44566	393.885	393484	2.56939	0.857344	3.28884	0.233709	1.23235	0.614363
CP1803 M 12 8/19/2019 7:10:56 PM (Run: 1)		m - dp	116.214	67.7343	10.3673	0.582841	198.357		0.0243217	9.41359	17.6652	6.11125	0.561209	6.91997	0.0719023	3.24633	0.458119	13.9078	3.24633	0.0566084	6.11125	-3.53722e-16		485.711	45.1779	476.332	135.123	452.313	25.2579	447.606	14.0378		6.03068	1.04063	447.872	14.3367	438.232	1266.59			1.56672	44.5456	377056	0.0747445		0.270732
Concordant and non-Metamorphic
CP1803 XS 130b 12/3/2019 11:23:10 PM (Run: 1)			555.823	115.052	46.3995	0.206995	573.261		0.0254518	10.606	16.1828	4.19926	0.63213	5.06038	0.0741921	2.82377	0.557565	13.4785	2.82377	0.0617941	4.19926	0		507.998	53.2069	666.971	89.9109	497.422	19.9005	461.363	12.5725		30.8272	7.24917	495.121	12.7088	456.619	313.919		260.667	8.62117	525.501	493125	2.81401	27.5104	45.4116	5.68289	25.6027	4.24659
CP1803 S 175 8/20/2019 2:47:28 AM (Run: 1)			136.25	61.3493	12.2789	0.45027	3558.2		0.0253347	5.57414	16.9268	6.62905	0.617076	7.46717	0.0757553	3.4372	0.45168	13.2004	3.4372	0.0590778	6.62905	1.52971e-16		505.69	27.8382	569.953	144.252	488.013	28.9331	470.737	15.6035		17.4078	3.54013	480.929	15.9168	459.103	976.655
CP1803 S 170a 8/20/2019 2:37:43 AM (Run: 1)			474.702	121.825	42.0767	0.256635	1450.5		0.02801	18.413	16.5694	6.11158	0.644138	9.67189	0.0774077	7.49627	0.772006	12.9186	7.49627	0.0603522	6.11158	-3.07805e-16		558.358	101.403	616.209	131.963	504.865	38.4753	480.631	34.719		22.002	4.80003	502.166	35.0803	473.941	526.461		116.403	1.69862	245.453	447741	1.73985	3.23796	8.82486	1.58652	8.56539	2.654
CP1803 XS 23 8/22/2019 3:58:06 PM (Run: 1)			71.3814	55.4226	8.22061	0.776428	163.748		0.0284315	8.88463	16.4754	5.14201	0.726025	6.12903	0.0867531	3.33537	0.529196	11.527	3.33537	0.0606967	5.14201	-4.1912e-16		566.644	49.6451	628.472	110.802	554.217	26.1774	536.306	17.1639		14.6651	3.23188	559.409	17.4899	539.246	1385.12		310.342	4.93746	1601.9	503720	13.1319		17.6369	0.362502	5.66581	10.9798
CP1803 S 208 8/20/2019 4:12:09 AM (Run: 1)			163.259	54.7744	17.3955	0.335506	75.9545		0.0381035	7.23524	16.5998	4.73785	0.747283	6.81569	0.0899679	4.89963	0.712268	11.1151	4.89963	0.0602416	4.73785	0		755.843	53.6772	612.29	102.366	566.647	29.598	555.347	26.0709		9.30001	1.99414	559.423	26.5451	535.684	378.962
CP1803 XS 34b 8/22/2019 4:25:21 PM (Run: 1)			413.17	77.5548	43.4138	0.187707	43222		0.0372752	8.82383	15.967	2.81039	0.794708	4.03752	0.0920303	2.89884	0.691802	10.866	2.89884	0.062629	2.81039	2.18674e-16		739.71	64.0908	695.677	59.889	593.839	18.1534	567.534	15.7485		18.42	4.42974	595.493	15.978	564.402	411.369		357.521	3.32071	762.967	485935	4.69401		9.19923	0.0229156	0.713161	3.24721
CP1803 XS 138b 12/3/2019 11:38:53 PM (Run: 1)			434.658	172.629	50.7957	0.397159	0		0.0402967	9.83838	16.2524	7.47096	0.812972	7.94331	0.0958276	2.6983	0.339395	10.4354	2.6983	0.0615295	7.47096	1.74737e-16		798.5	77.0279	657.805	160.202	604.12	36.1673	589.911	15.211		10.3213	2.35206	600.445	15.788	572.273	#VALUE!
CP1803 S 241 8/20/2019 5:48:48 AM (Run: 1)			256.286	126.901	36.8254	0.495152	496.644		0.0366895	7.04418	15.2582	5.12493	1.07664	6.88599	0.119144	4.59913	0.661083	8.39319	4.59913	0.0655386	5.12493	0		728.293	50.389	791.664	107.526	741.993	36.2498	725.636	31.5632		8.34038	2.20449	736.258	32.3967	717.125	790.89
CP1803 S 213b 8/20/2019 4:29:59 AM (Run: 1)			206.081	117.51	31.1007	0.570214	0		0.0378673	10.2418	14.7807	7.90808	1.14514	10.698	0.122758	7.20486	0.67062	8.14608	7.20486	0.0676559	7.90808	0		751.243	75.5286	858.038	164.175	774.945	57.9878	746.42	50.7818		13.0084	3.68082	768.073	52.0508	735.828	1376.1		149.371	3.55919	749.422	403864	2.09151	1.69267	15.4702	0.845669	8.62861	6.00225
CP1803 XS 126 12/3/2019 11:15:19 PM (Run: 1)			450.064	162.12	70.3974	0.360215	3720.45		0.0333324	5.24573	14.5512	1.8154	1.29136	6.72701	0.136284	6.47742	0.96275	7.33764	6.47742	0.0687228	1.8154	0		662.734	34.2014	890.428	37.4973	841.898	38.4951	823.613	50.0815		7.50373	2.17191	837.233	51.4586	825.011	358.774		324.063	11.7381	1010.05	562875	3.72716	6.03753	25.3275	1.48951	8.15439	4.90769
CP1803 S 188 8/20/2019 3:16:58 AM (Run: 1)			428.111	357.026	80.3849	0.833958	377.319		0.0449783	3.7205	13.9516	1.96747	1.37985	2.51863	0.139622	1.57243	0.568377	7.16218	1.57243	0.0716762	1.96747	1.44147e-16		889.256	32.3675	976.76	40.0983	880.373	14.8278	842.526	12.4189		13.7428	4.29905	883.226	12.7901	840.244	1390.59		208.317	4.92227	612.578	443927	5.47495		24.6621	0.0623215	0.584217	1.26056
CP1803 S 170b 8/20/2019 2:37:43 AM (Run: 1)			576.395	93.9772	91.1261	0.163043	1188.11		0.0386598	10.2071	14.4576	4.01176	1.3385	5.41575	0.14035	3.63815	0.660541	7.12505	3.63815	0.069168	4.01176	1.23114e-16		766.672	76.7896	903.744	82.6913	862.578	31.4753	846.641	28.8651		6.3185	1.84762	869.422	29.8108	857.833	99.4282		108.684	3.34529	593.538	419479	4.49309	0.581704	6.8831	0.3929	3.29575	2.93544
CP1803 S 213a 8/20/2019 4:29:59 AM (Run: 1)			314.141	152.916	55.3195	0.486774	792.335		0.0480329	5.94191	14.2699	3.2093	1.38253	3.56065	0.143086	1.54227	0.393051	6.98883	1.54227	0.0700775	3.2093	1.78979e-16		948.252	55.043	930.623	65.8746	881.519	20.9795	862.087	12.445		7.36458	2.20445	880.204	13.0031	853.711	1058.47		386.658	3.76785	1701.11	437072	5.70993		29.8757	0.230667	6.86281	13.8532
CP1803 S 265 8/20/2019 6:47:48 AM (Run: 1)			251.122	87.6346	42.9536	0.348972	457.029		0.0533574	8.51773	13.8525	2.82522	1.42736	4.69375	0.143403	3.74826	0.786575	6.97334	3.74826	0.0721892	2.82522	1.66295e-16		1050.68	87.2078	991.289	57.4516	900.445	28.0252	863.879	30.3045		12.853	4.06087	895.669	31.1522	847.152	384.154
CP1803 XS 24 8/22/2019 3:59:54 PM (Run: 1)			476.463	188.888	82.9009	0.396437	144706		0.0444494	3.8979	13.8475	1.41105	1.45936	3.1124	0.146566	2.77416	0.85582	6.82288	2.77416	0.0722153	1.41105	2.25771e-16		879.024	33.5291	992.018	28.691	913.745	18.7528	881.684	22.8603		11.1222	3.50879	911.095	23.5156	877.516	841.608		507.274	5.44517	1224.6	508425	11.6137		35.2886		1.34894	4.76118
CP1803 XS 127 12/3/2019 11:17:17 PM (Run: 1)			98.55	43.124	17.355	0.437584	896.936		0.040159	8.90205	13.4919	3.37968	1.52871	5.79745	0.149588	4.71044	0.812266	6.68503	4.71044	0.0741184	3.37968	-4.4037e-16		795.824	69.4681	1044.71	68.1718	941.979	35.5871	898.654	39.5125		13.9802	4.59938	934.219	40.6501	893.214	541.175
CP1803 XS 19 8/22/2019 3:43:23 PM (Run: 1)			692.308	189.442	119.685	0.273639	1039.28		0.0479071	4.2668	14.1442	1.73444	1.47432	2.98403	0.151241	2.4282	0.771437	6.61194	2.4282	0.0707002	1.73444	0		945.827	39.4268	948.738	35.502	919.903	18.0538	907.919	20.564		4.30251	1.30281	911.935	21.2938	894.683	388.808		298.912	3.42212	822.138	530835	10.1575	0.0291437	15.7081	0.0696462	0.976608	1.44685
CP1803 S 259 8/20/2019 6:36:06 AM (Run: 1)			249.452	135.971	46.944	0.545078	8982.89		0.0481191	4.59838	14.1383	3.56657	1.48634	5.00525	0.152411	3.51171	0.689545	6.56121	3.51171	0.0707297	3.56657	2.81516e-16		949.914	42.6702	949.615	72.9928	924.824	30.3818	914.464	29.9396		3.70163	1.12024	920.36	31.0757	904.693	982.098		273.708	3.3102	885.802	464294	4.87079		20.6022	0.0514895	1.64939	5.14156
CP1803 XS 129 12/3/2019 11:21:12 PM (Run: 1)			331.392	323.445	67.7271	0.976019	1515		0.0418628	3.28353	13.7627	2.46194	1.54281	3.94295	0.153998	3.07988	0.780583	6.49358	3.07988	0.0726602	2.46194	0		828.905	26.6668	1004.5	49.9636	947.628	24.2913	923.337	26.495		8.07966	2.56332	941.628	27.4083	927.58	1522.17		930.465	9.1899	1935.6	518798	12.0104	3.30193	91.9823	1.57	12.0393	15.4267
CP1803 S 253 8/20/2019 6:20:15 AM (Run: 1)			112.249	49.1052	20.4528	0.437469	293.124		0.0455217	7.141	14.4181	3.54766	1.4758	4.72536	0.154325	3.1214	0.646099	6.47984	3.1214	0.0693572	3.54766	1.57756e-16		899.765	62.843	909.386	73.0604	920.511	28.6008	925.161	26.9015		-1.73476	-0.505217	910.433	28.0478	911.572	906.246		287.946	12.0916	891.305	467569	2.88523		11.4708	0.0523611	2.18729	5.36813
CP1803 XS 26 8/22/2019 4:03:28 PM (Run: 1)			267.689	156.805	52.254	0.585774	2118.9		0.0486608	4.13612	13.7782	2.43327	1.55173	4.46675	0.155063	3.7458	0.820275	6.44901	3.7458	0.0725783	2.43327	0		960.358	38.7926	1002.2	49.3991	951.18	27.5805	929.28	32.4164		7.27634	2.30244	952.813	33.5208	928.777	900.251		258.462	4.90926	773.992	494269	6.30614		35.1632	0.0862177	1.24023	3.15236
CP1803 S 240 8/20/2019 5:46:51 AM (Run: 1)			380.854	224.996	74.9837	0.590767	355.999		0.0499274	4.45285	13.7607	2.48901	1.56073	3.28736	0.155764	2.14745	0.622662	6.41996	2.14745	0.0726708	2.48901	1.66471e-16		984.756	42.7987	1004.81	50.5103	954.758	20.3442	933.194	18.6569		7.12691	2.2586	956.092	19.367	930.445	1157.27		183.937	8.6315	541.84	449533	7.13867		28.8877	0.0487296	1.21301	2.74099
CP1803 XS 20 8/22/2019 3:45:11 PM (Run: 1)			206.628	71.2895	39.3593	0.345014	364.469		0.0535349	5.74685	13.1848	3.15584	1.66398	3.80785	0.159119	2.13082	0.521814	6.28462	2.13082	0.0758449	3.15584	-2.65437e-16		1054.09	59.0242	1090.97	63.2175	994.895	24.1505	951.877	18.8564		12.7497	4.32386	998.352	19.5946	951.38	629.944		248.388	8.22581	657.233	507043	2.36133	0.337583	12.6624	0.176977	1.51463	3.12844
CP1803 XS 27 8/22/2019 4:05:16 PM (Run: 1)			151.201	54.3022	28.9673	0.359138	460.572		0.0513364	7.45815	13.5421	3.00255	1.63043	4.05972	0.160135	2.73239	0.645415	6.24473	2.73239	0.0738438	3.00255	0		1011.86	73.6084	1037.19	60.6343	982.024	25.5506	957.527	24.3131		7.68037	2.49453	986.566	25.2497	961.206	511.914		208.646	6.45168	274.627	511721	0.432129		3.71015			0.0956476
CP1803 S 255 8/20/2019 6:24:10 AM (Run: 1)			328.315	62.2702	60.0522	0.189666	1227.89		0.050885	10.2077	14.1632	3.26511	1.58101	6.73579	0.162403	5.89152	0.869291	6.15751	5.89152	0.0706055	3.26511	-3.68076e-16		1003.18	99.9017	946.013	66.8606	962.767	41.8951	970.119	53.062		-2.54817	-0.763617	960.517	55.2915	966.008	295.536		209.774	5.81554	657.592	465194	3.23232	0.0843563	7.37236	0.0580728	0.657804	2.94482
CP1803 XS 29 8/22/2019 4:08:51 PM (Run: 1)			133.874	54.942	26.734	0.410401	651.724		0.0550803	5.17803	13.3497	2.80567	1.68902	4.07401	0.163534	2.95394	0.699597	6.11495	2.95394	0.0749079	2.80567	0		1083.71	54.6371	1066.04	56.4122	1004.4	25.9832	976.384	26.7638		8.41045	2.78884	1009.37	27.7785	977.258	530.508		300.568	7.91526	605.966	487792	4.22475		19.314	0.0535269	0.713923	2.51626
CP1803 S 260 8/20/2019 6:38:02 AM (Run: 1)			96.0709	22.7463	17.8619	0.236766	144.366		0.0580481	7.96264	14.1759	3.03403	1.59104	4.02023	0.16358	2.63759	0.636103	6.11321	2.63759	0.070542	3.03403	0		1140.49	88.2983	944.173	62.1464	966.703	25.0661	976.642	23.9034		-3.43884	-1.02814	956.13	25.0275	955.509	370.43		258.712	13.7371	596.671	458653	4.07205		10.1679	0.0489315	1.23848	3.08709
CP1803 XS 10 8/22/2019 3:19:46 PM (Run: 1)			32.4882	29.102	7.23656	0.895771	63.5389		0.0479766	12.7832	13.9701	6.18662	1.63639	7.33026	0.165801	3.93173	0.525754	6.03132	3.93173	0.0715813	6.18662	-1.47782e-16		947.167	118.285	974.074	126.138	984.325	46.1984	988.935	36.0466		-1.52559	-0.468335	991.664	37.8719	1006.87	639.81		455.902	28.5214	1951.45	509356	2.25852	0.109339	12.0848	1.03261	16.8	29.5091
CP1803 M 13 8/19/2019 7:12:53 PM (Run: 1)			184.479	63.8205	36.6337	0.345949	529.392		0.0599928	4.93768	13.7279	2.1999	1.67501	3.79231	0.166771	3.08902	0.793456	5.99625	3.08902	0.0728443	2.1999	-2.59801e-16		1177.6	56.4848	1009.65	44.6102	999.089	24.1116	994.295	28.4625		1.52071	0.479839	995.254	29.6624	979.452	742.803		35.7351	4.05875	119.969	394608	0.367882		0.883832
CP1803 S 220 8/20/2019 4:51:43 AM (Run: 1)			123.744	33.5809	23.6432	0.271373	95.1143		0.0504505	9.41043	13.2637	3.98754	1.74121	5.17747	0.167499	3.30238	0.625021	5.97019	3.30238	0.075394	3.98754	0		994.825	91.3508	1079.02	80.0206	1023.91	33.393	998.316	30.5422		7.47926	2.49963	1014.28	31.8489	983.761	275.6		288.561	9.52601	556.979	488246	3.31821		6.63917	0.0311217	2.40839	3.10883
CP1803 S 185 8/20/2019 3:11:07 AM (Run: 1)			17.0788	17.363	3.99661	1.01664	159.398		0.0560107	12.9701	13.2846	10.0765	1.74738	11.0553	0.168358	4.54797	0.406977	5.93973	4.54797	0.0752751	10.0765	3.03304e-16		1101.53	139.046	1075.86	202.306	1026.19	71.3951	1003.06	42.2468		6.76688	2.25449	1012.23	44.68	963.909	1640.67		244.724	39.2043	553.788	444931	2.35745		24.7169	0.0908078	2.44105	4.49436
CP1803 S 261 8/20/2019 6:40:00 AM (Run: 1)			202.002	94.6653	41.5879	0.468635	815.635		0.0550581	5.20667	13.4966	3.49784	1.72894	4.3404	0.16924	2.56986	0.573106	5.90876	2.56986	0.0740928	3.49784	-1.95764e-16		1083.29	54.9184	1043.98	70.5637	1019.36	27.9219	1007.92	23.9788		3.45405	1.1217	1013.45	25.1143	993.554	561.186		319.278	5.83419	623.886	471816	4.17334	0.533313	18.8225	0.109724	1.76431	3.45542
CP1803 S 221 8/20/2019 4:53:40 AM (Run: 1)			119.34	62.9079	24.6769	0.527133	124.609		0.0494325	7.37845	13.5997	4.47791	1.7334	5.54246	0.170973	3.26606	0.577181	5.84888	3.26606	0.0735309	4.47791	-1.1959e-16		975.228	70.2483	1028.65	90.5431	1021.01	35.6885	1017.47	30.7414		1.08653	0.347188	1011.13	32.2659	1005.06	780.85		286.383	19.2935	505.988	478567	2.1403		15.2694	0.0621103	1.83405	3.42873
CP1803 S 256 8/20/2019 6:26:07 AM (Run: 1)			96.6275	51.6757	20.236	0.534793	86.3067		0.0535145	7.55769	13.5755	4.65743	1.73928	5.15997	0.171247	2.22117	0.41189	5.83952	2.22117	0.0736622	4.65743	1.68857e-16		1053.69	77.5947	1032.25	94.1217	1023.2	33.2667	1018.98	20.935		1.28603	0.412206	1012.5	22.1785	999.412	812.65		342.209	18.9351	935.553	440104	10.2361		21.1237	0.0729439	2.22439	4.1458
CP1803 XS 6 8/22/2019 3:12:35 PM (Run: 1)			28.3551	17.7542	6.27766	0.626136	66.0614		0.0546308	9.02382	12.6731	5.91378	1.86531	7.39535	0.171448	4.44054	0.591141	5.83268	4.44054	0.0789075	5.91378	1.36905e-16		1075.1	94.4801	1169.82	117.094	1068.87	48.8842	1020.08	41.8951		12.7997	4.56437	1077.15	43.6303	1027.38	933.074		245.826	19.8591	856.02	513564	1.27437	0.0540179	3.15408	0.493762	7.22899	9.32447
CP1803 S 224 8/20/2019 4:59:32 AM (Run: 1)			83.5703	32.6553	16.8204	0.390753	103.131		0.0514464	9.69941	13.5885	4.60876	1.74266	6.15327	0.171743	4.07701	0.653858	5.82264	4.07701	0.0735919	4.60876	3.71562e-16		1013.98	95.9237	1030.28	93.1678	1024.45	39.6987	1021.71	38.5219		0.831719	0.267141	1013.22	40.3607	1004.75	560.416		127.317	7.84276	171.897	468907	0.764097	0.0315506	0.91877			0.689923
CP1803 S 228 8/20/2019 5:07:21 AM (Run: 1)			202.363	146.93	44.6139	0.726071	568.647		0.0508598	5.5292	13.1781	2.64168	1.80137	4.01168	0.172168	3.01912	0.734557	5.80827	3.01912	0.0758837	2.64168	2.20686e-16		1002.7	54.0885	1091.98	52.9104	1045.95	26.1932	1024.05	28.5866		6.22105	2.09448	1040.19	29.794	1016.72	1454.08		344.257	9.95469	890.551	476776	4.26704		39.5204	0.0440884	2.18328	4.05346
CP1803 XS 18 8/22/2019 3:41:36 PM (Run: 1)			164.749	142.288	38.33	0.863665	1571.05		0.0519781	3.2639	13.4008	2.80396	1.78673	3.88753	0.173655	2.69271	0.66338	5.75856	2.69271	0.0746226	2.80396	2.36724e-16		1024.2	32.5959	1058.36	56.4432	1040.63	25.3086	1032.22	25.6835		2.47	0.808906	1044.71	26.8683	1039.9	1345.07		397.188	10.7687	2009.94	524879	2.94391	1.77331	31.7257	1.28734	17.2715	19.3811
CP1803 XS 135 12/3/2019 11:32:59 PM (Run: 1)			144.546	44.103	28.6949	0.305113	840.752		0.0460522	5.90277	13.6882	3.91967	1.75388	5.48685	0.174118	3.83949	0.699458	5.74322	3.83949	0.0730558	3.91967	0		910.016	52.5249	1015.49	79.4151	1028.59	35.482	1034.76	36.7049		-1.898	-0.599594	1020.33	38.5094	1027.35	#VALUE!		182.813	2.53201	902.506	484400	2.64703	0.0191118	13.8797	0.170472	3.32502	6.17455
CP1803 S 215b 8/20/2019 4:33:53 AM (Run: 1)			481.79	148.379	102.341	0.307975	710.119		0.0652977	7.30037	12.2993	3.24764	1.96544	6.87206	0.175322	6.05624	0.876001	5.70378	6.05624	0.0813057	3.24764	-1.83233e-16		1278.5	90.4449	1228.84	63.7569	1103.75	46.2474	1041.37	58.2373		15.2558	5.65143	1113.9	60.1828	1045.68	602.794		292.211	12.0948	1318.31	438658	5.45158	0.172561	10.2418	0.227985	2.32755	5.31829
CP1803 S 275 8/20/2019 7:07:18 AM (Run: 1)			206.712	115.331	45.6819	0.55793	2020.94		0.0596704	4.34524	13.7091	2.57904	1.77169	3.65471	0.176155	2.5895	0.686451	5.67681	2.5895	0.0729443	2.57904	1.32075e-16		1171.45	49.4555	1012.41	52.277	1035.14	23.7206	1045.94	25.0014		-3.31143	-1.04299	1030.57	26.2614	1028.68	27.5585		256.806	10.9074	1025.36	446894	3.36705	0.958343	31.8209	0.402622	3.39686	6.56205
CP1803 S 214 8/20/2019 4:31:56 AM (Run: 1)			751.291	197.988	160.239	0.26353	952.302		0.061746	3.76118	13.1145	2.45297	1.8561	3.85451	0.176544	2.97324	0.752168	5.66432	2.97324	0.0762514	2.45297	-2.52543e-16		1211.01	44.2104	1101.69	49.0591	1065.6	25.4347	1048.06	28.7603		4.86728	1.64561	1089.7	30.0025	1079.05	523.976		350.376	12.9567	1113.05	435442	6.52009		16.2252		0.895193	4.64121
CP1803 XS 133 12/3/2019 11:29:03 PM (Run: 1)			124.384	84.1159	27.4022	0.676259	390.157		0.0454396	5.31179	13.5507	2.67779	1.81982	4.19171	0.178849	3.22489	0.768873	5.59131	3.22489	0.0737972	2.67779	2.03053e-16		898.176	46.6647	1035.94	54.0854	1052.62	27.4681	1060.68	31.5399		-2.38873	-0.766131	1044.11	33.1149	1062.73	1445.95		381.256	6.11629	1130.04	469821	5.76443	0.223749	21.5658	0.314954	3.57592	7.41523
CP1803 XS 21 8/22/2019 3:54:31 PM (Run: 1)			276.185	197.472	63.9094	0.714999	732.285		0.0539086	4.38285	13.3017	1.9203	1.85792	3.98526	0.179239	3.49209	0.854226	5.57914	3.49209	0.0751783	1.9203	0		1061.25	45.3131	1073.27	38.5691	1066.25	26.3065	1062.82	34.2164		0.973922	0.321692	1066.76	35.7925	1063.78	1143.49		202.815	7.38559	1081.98	510629	3.61471		13.7191	0.587106	8.64189	17.4946
CP1803 S 166 8/20/2019 2:21:52 AM (Run: 1)			252.696	60.7735	52.4567	0.2405	290.2		0.0606612	6.24598	12.3815	2.08351	1.99647	2.70165	0.179281	1.71985	0.589045	5.57784	1.71985	0.080766	2.08351	0		1190.34	72.2016	1215.77	40.9795	1114.32	18.2773	1063.04	16.8548		12.5623	4.60134	1112.11	17.5839	1054.87	337.539		151.844	3.9935	384.933	438065	3.66709		10.6984		0.463761	0.897959
CP1803 S 191 8/20/2019 3:30:53 AM (Run: 1)			85.3375	66.002	19.6539	0.773423	717.852		0.0516224	5.09271	13.6761	3.28173	1.81921	5.05841	0.180445	3.84939	0.749614	5.54186	3.84939	0.0731201	3.28173	1.38251e-16		1017.36	50.5289	1017.3	66.471	1052.4	33.1436	1069.4	37.9323		-5.1224	-1.61579	1041.21	39.919	1056.84	917.161		292.741	11.7826	1007.24	448612	1.3049		15.3006	0.225332	4.43587	10.9583
CP1803 S 179 8/20/2019 2:59:24 AM (Run: 1)			244.875	80.1631	52.0106	0.327363	501.739		0.0574218	5.84833	12.9503	2.83913	1.92179	3.85426	0.180504	2.60666	0.654256	5.54006	2.60666	0.0772182	2.83913	1.19493e-16		1128.52	64.1909	1126.8	56.5723	1088.69	25.7412	1069.73	25.6934		5.06558	1.74209	1085.97	26.9216	1062.59	619.074		256.791	5.88688	677.367	463813	5.58307		15.8536	0.0574286	1.15072	2.71738
CP1803 S 262 8/20/2019 6:41:56 AM (Run: 1)			218.388	102.996	47.8875	0.47162	664.158		0.0562489	5.1115	13.206	2.67558	1.88509	3.47808	0.180552	2.22224	0.611568	5.53856	2.22224	0.0757229	2.67558	0		1106.09	55.0185	1087.73	53.6232	1075.85	23.075	1069.99	21.9092		1.63099	0.544978	1070.88	23.0309	1059.6	541.641		238.519	4.10446	2002.18	461922	4.38263		15.3681	0.427014	7.08106	15.0738
CP1803 S 182 8/20/2019 3:05:15 AM (Run: 1)			70.8522	60.373	16.9146	0.852097	293.214		0.054275	7.76053	13.4746	6.40102	1.86728	6.70677	0.182484	2.00191	0.281988	5.47995	2.00191	0.0742137	6.40102	-2.72237e-16		1068.28	80.7513	1047.26	129.068	1069.57	44.3488	1080.53	19.9155		-3.17666	-1.02482	1057.5	21.6883	1061.79	1382.47		302.561	18.4379	1027.49	456841	2.38829	0.038352	29.4935	0.265698	8.60479	13.4443
CP1803 XS 31 8/22/2019 4:19:58 PM (Run: 1)			97.8111	28.3077	20.9714	0.289413	834.186		0.0552325	7.85633	13.0897	3.92532	1.92491	4.84227	0.182742	2.8354	0.563232	5.4722	2.8354	0.0763959	3.92532	1.60998e-16		1086.63	83.1149	1105.49	78.4608	1089.77	32.3576	1081.94	28.2411		2.13066	0.719063	1095.64	29.752	1090.8	539.143		265.073	4.24598	1342.41	511609	1.60558	0.0827944	5.21238	0.66291	8.15397	14.0469
CP1803 S 270 8/20/2019 6:57:33 AM (Run: 1)			251.048	81.2132	54.2224	0.323497	706.226		0.0587014	6.21134	12.8895	2.57307	1.96158	3.85092	0.183376	2.86512	0.724978	5.45328	2.86512	0.0775823	2.57307	1.20107e-16		1152.96	69.6103	1136.17	51.1999	1102.42	25.8986	1085.39	28.6207		4.46975	1.54512	1100.51	29.9834	1079.17	#VALUE!		261.594	5.44783	1041.41	446255	9.3045		19.221	0.0373448	1.12189	3.90988
CP1803 S 197 8/20/2019 3:42:36 AM (Run: 1)			134.897	47.5625	29.3663	0.352585	1681.15		0.0613692	7.62345	12.9696	3.7823	1.95957	5.44247	0.184326	3.9134	0.708658	5.42518	3.9134	0.0771033	3.7823	-1.18511e-16		1203.83	89.0939	1123.85	75.3982	1101.73	36.5896	1090.56	39.2634		2.96216	1.01401	1093.43	41.218	1071.86	667.758		281.427	8.5927	714.82	448450	4.8109		16.0295	0.0209394	1.64884	2.6873
CP1803 S 211 8/20/2019 4:26:04 AM (Run: 1)			194.162	64.5904	42.3778	0.332662	382.866		0.0606442	8.59144	12.7357	2.69632	2.00287	3.61282	0.185002	2.40466	0.640231	5.40536	2.40466	0.0785194	2.69632	1.35996e-16		1190.02	99.2882	1160.04	53.4642	1116.48	24.4677	1094.24	24.2007		5.67252	1.99233	1111.79	25.3994	1082.23	195.11		264.192	7.36995	621.394	422340	4.27891		16.3407	0.0460687	0.376714	3.29735
CP1803 S 195 8/20/2019 3:38:41 AM (Run: 1)			139.328	67.3816	32.3265	0.483617	221.678		0.0654849	6.16995	12.8645	3.33301	2.0164	3.9088	0.188134	2.04201	0.494678	5.31536	2.04201	0.0777333	3.33301	1.28947e-16		1282.06	76.6457	1140.06	66.2831	1121.05	26.5314	1111.26	20.8438		2.52601	0.873026	1113.06	22.0763	1086.64	907.027		264.522	3.49765	1900.88	447085	4.31944		11.8968	0.24094	8.38103	15.797
CP1803 S 183 8/20/2019 3:07:13 AM (Run: 1)			111.374	23.9477	23.9719	0.215022	9100.47		0.0581742	8.24484	13.1256	3.90337	2.00769	5.58624	0.191124	3.99622	0.705443	5.23219	3.99622	0.0761868	3.90337	2.24484e-16		1142.89	91.6152	1099.99	78.0866	1118.11	37.8628	1127.46	41.3358		-2.49756	-0.836345	1108.29	43.6568	1111.7	417.704		149.401	2.96331	721.18	452729	10.2831		10.2994	0.172624	2.98432	6.06891
CP1803 XS 22 8/22/2019 3:56:19 PM (Run: 1)			266.109	127.185	62.7485	0.477943	2407.46		0.0603724	4.44562	12.7899	2.19185	2.068	3.24669	0.19183	2.39516	0.698302	5.21295	2.39516	0.0781866	2.19185	-1.69278e-16		1184.84	51.1593	1151.64	43.5144	1138.27	22.2211	1131.28	24.8516		1.76778	0.614068	1138.71	26.1658	1128.34	692.765		544.852	5.33608	1514.14	506435	8.0687	17.962	56.9943	5.76548	27.8078	14.9724
CP1803 M 16 8/19/2019 7:18:44 PM (Run: 1)			242.433	51.6571	53.9211	0.213078	609.609		0.0685285	8.56091	13.1028	2.42947	2.03611	5.26994	0.193492	4.67653	0.877387	5.16818	4.67653	0.0763197	2.42947	0		1339.71	110.973	1103.47	48.5765	1127.66	35.8855	1140.26	48.8748		-3.33416	-1.11758	1126.1	51.5358	1132.24	396.188		170.635	5.92024	693.476	392860	3.04219		12.1678	0.0395015	0.861733	2.61076
CP1803 XS 128 12/3/2019 11:19:14 PM (Run: 1)			946.235	624.881	251.566	0.660387	10426.1		0.0528174	3.62987	11.1203	0.755016	2.63065	2.90726	0.212168	2.80751	0.964902	4.71325	2.80751	0.0899254	0.755016	0		1040.32	36.8068	1423.95	14.4224	1309.25	21.3891	1240.36	31.6779		12.8934	5.26175	1308.9	33.1966	1257.33	969.352		696.196	21.6249	3299.24	524616	9.16147	6.29355	46.2873	1.429	10.5152	17.5906
CP1803 XS 32 8/22/2019 4:21:46 PM (Run: 1)			61.1426	41.1635	18.1989	0.673238	563.2		0.0717017	7.35696	11.6261	3.42927	2.69714	4.41592	0.227424	2.78217	0.60509	4.39707	2.78217	0.0860133	3.42927	1.87987e-16		1399.65	99.487	1338.46	66.2851	1327.67	32.7106	1320.98	33.231		1.3058	0.503831	1334.83	35.6572	1326.28	1232.71		213.323	6.01093	1266.11	489684	11.1207		12.8677	0.0754496	1.9451	5.20015
CP1803 XS 131 12/3/2019 11:25:08 PM (Run: 1)			99.6951	42.3437	27.0091	0.424732	2297.55		0.0574415	7.21438	11.3791	1.44986	2.78299	3.19233	0.229677	2.8441	0.890208	4.35395	2.8441	0.0878807	1.44986	0		1128.9	79.2102	1379.88	27.8635	1350.98	23.8459	1332.8	34.2443		3.41174	1.34553	1341.12	36.4954	1327.3	273.513		357.482	14.7474	1009.28	509897	5.25981		13.3603	0.145192	1.85027	5.16328
CP1803 S 250 8/20/2019 6:14:24 AM (Run: 1)			244.878	130.016	74.1747	0.530944	3024.26		0.0732879	5.3248	10.9694	2.34592	3.03625	3.34846	0.241556	2.38932	0.686831	4.13982	2.38932	0.0911629	2.34592	1.58707e-16		1429.54	73.4907	1450.01	44.6537	1416.78	25.5761	1394.78	29.9671		3.80873	1.55268	1418.13	32.2255	1394.43	1193.13		269.043	2.78791	1254.88	459790	1.66256		7.92571	0.137099	2.91235	7.45652
CP1803 S 217 8/20/2019 4:37:49 AM (Run: 1)			143.156	98.8966	45.489	0.690829	223.846		0.0759382	6.13416	10.7351	2.8425	3.14714	4.13936	0.24503	3.00907	0.7093	4.08113	3.00907	0.0931528	2.8425	-2.05698e-16		1479.39	87.5065	1491.01	53.8073	1444.3	31.8956	1412.79	38.1759		5.24603	2.18146	1437.15	41.0609	1393.21	964.779		365.597	8.73574	1077.66	475810	2.44234		20.7788	0.0350338	1.7585	3.88066
CP1803 S 194 8/20/2019 3:36:44 AM (Run: 1)			188.111	114.713	59.1936	0.609815	985.108		0.0765526	3.47542	10.7346	2.68904	3.15921	4.10784	0.245959	3.10538	0.738608	4.06572	3.10538	0.0931569	2.68904	-2.12027e-16		1490.93	49.951	1491.09	50.9022	1447.25	31.6819	1417.6	39.5177		4.92813	2.04866	1444.93	42.4991	1407.03	1228.41		361.763	3.71696	1660.49	442864	2.00614	0.047277	9.95988	0.262181	4.48539	12.0365
CP1803 S 249 8/20/2019 6:12:26 AM (Run: 1)			101.141	43.4987	30.8713	0.430081	479.154		0.0794186	6.64607	10.3702	2.77209	3.33024	3.75141	0.250474	2.52756	0.651196	3.99243	2.52756	0.0964297	2.77209	1.25122e-16		1544.66	98.8348	1556.15	52.0229	1488.17	29.2946	1440.92	32.6369		7.40494	3.17486	1478.36	35.2045	1417.36	590.897		243.742	4.06596	844.7	454303	2.64072	0.790211	7.39195	0.126597	2.37981	4.37487
CP1803 S 196 8/20/2019 3:40:38 AM (Run: 1)			82.7587	36.4326	25.3516	0.440227	123111		0.0785397	9.48153	10.7642	3.8686	3.23266	4.61546	0.252372	2.51724	0.52634	3.96241	2.51724	0.0929004	3.8686	-1.79726e-16		1528.2	139.555	1485.85	73.2823	1465.03	35.7925	1450.7	32.7001		2.36612	0.978077	1453.69	35.6739	1425.93	667.903		168.006	5.08962	1059.12	453264	0.862646		2.35273	0.0606133	2.33191	6.27153
CP1803 S 212 8/20/2019 4:28:01 AM (Run: 1)			122.53	17.8986	36.3928	0.146074	269.302		0.0817098	7.28141	9.3412	2.79174	3.83856	4.22772	0.260058	3.17487	0.734556	3.8453	3.17487	0.107053	2.79174	0		1587.52	111.171	1749.83	51.1073	1600.87	34.0556	1490.14	42.2399		14.8412	6.91708	1593.61	45.3558	1475.04	156.67		49.9569	2.73885	169.885	423660	0.810683	3.57831	13.4343	1.33647	7.85634	2.41068
CP1803 XS 132a 12/3/2019 11:27:05 PM (Run: 1)			392.599	305.833	157.369	0.778996	4704.37		0.0810752	2.05013	8.65252	0.750153	4.8669	2.3773	0.305418	2.25584	0.947711	3.27421	2.25584	0.115573	0.750153	5.20183e-16		1575.66	31.076	1888.83	13.5014	1796.54	20.0243	1718.12	34.0229		9.03813	4.36543	1789.43	37.5256	1717.76	1042.77		228.842	5.13633	1754.71	500965	2.54359		20.3178	0.412868	5.2929	12.7453
CP1803 XS 137 12/3/2019 11:36:55 PM (Run: 1)			55.4865	15.8886	26.3003	0.28635	577.012		0.110469	9.10017	6.22529	2.23843	8.56109	6.39962	0.386534	5.99538	0.936666	2.5871	5.99538	0.160635	2.23843	0		2117.88	182.977	2462.36	37.8218	2292.43	58.1843	2106.73	107.744		14.4424	8.10055	2280.3	126.835	2080.4	#VALUE!		282.75	5.07433	683.507	460426	1.5196		6.88447	0.0652836	1.55655	2.60208
CP1803 S 223 8/20/2019 4:57:34 AM (Run: 1)			141.496	72.2361	78.6357	0.510517	458.28		0.1185	5.75463	5.56595	1.36242	10.3939	2.73958	0.419584	2.37679	0.833966	2.38331	2.37679	0.179664	1.36242	1.37219e-16		2263.53	123.229	2649.77	22.6015	2470.51	25.3759	2258.59	45.2864		14.7628	8.57799	2471.62	55.9711	2259.44	827.272		255.706	5.02147	414.24	472850	0.730952		8.20346		0.581073	1.28748
CP1803 S 243 8/20/2019 5:52:42 AM (Run: 1)			129.801	100.588	77.8901	0.774937	514.018		0.123819	5.05726	5.91079	1.69444	10.0623	3.44713	0.43136	3.00193	0.850026	2.31825	3.00193	0.169182	1.69444	1.74537e-16		2359.41	112.621	2549.56	28.383	2440.51	31.8375	2311.84	58.319		9.32386	5.2722	2440.48	72.735	2306.65	1224.25		327.045	12.5174	849.028	448401	3.54743		20.8297	0.0862091	2.53267	6.31305
CP1803 S 190 8/20/2019 3:28:55 AM (Run: 1)			112.536	131.762	76.3031	1.17085	346.839		0.136401	3.19428	5.45443	1.53237	11.075	3.17297	0.438118	2.77841	0.850527	2.28249	2.77841	0.183337	1.53237	2.08567e-16		2584.46	77.4948	2683.29	25.3406	2529.46	29.5497	2342.21	54.5646		12.7113	7.40268	2529.75	69.048	2307.16	1353.54		163.09	7.03812	596.047	447523	0.803627	1.77186	39.0602	0.59111	7.70394	10.8828
CP1803 S 176 8/20/2019 2:49:26 AM (Run: 1)			82.3128	79.5443	55.8897	0.966366	1594.14		0.137357	4.94428	5.31471	2.21569	12.0266	3.32952	0.463575	2.48523	0.719661	2.15715	2.48523	0.188157	2.21569	-4.79895e-16		2601.44	120.689	2726.13	36.494	2606.48	31.2121	2455.32	50.7447		9.93359	5.79926	2599.11	67.1038	2420.16	1482.59		294.882	4.47471	1070.96	465859	1.98676		24.8734	0.34963	4.1195	9.69224
CP1803 S 201 8/20/2019 3:58:28 AM (Run: 1)			133.448	133.482	99.9533	1.00026	749.868		0.149947	4.01448	5.38562	1.27236	12.8705	3.77504	0.502726	3.55416	0.925015	1.98915	3.55416	0.18568	1.27236	0		2823.96	105.804	2704.27	20.9993	2670.22	35.5677	2625.5	76.6491		2.91286	1.67477	2674.96	105.018	2615.15	1342.7		225.014	7.99927	1244.65	444292	1.22343		33.5768	0.129146	3.38981	11.1324
CP1803 S 189 8/20/2019 3:26:58 AM (Run: 1)			68.6354	37.7628	47.0782	0.550194	1998.22		0.161911	8.66368	5.35558	2.13574	13.0612	3.31462	0.507327	2.53482	0.738376	1.97111	2.53482	0.186721	2.13574	0		3033.16	244.016	2713.49	35.2188	2684.08	31.2626	2645.21	54.9979		2.51629	1.44827	2675.99	76.535	2602.35	458.424		198.847	4.83071	901.021	446023	1.4542		6.90106	0.0755885	1.86004	2.6825
DISCORDANT ANALYSES
CP1803 M 14 8/19/2019 7:14:50 PM (Run: 1)		m - dp	21.5097	4.84903	1.89719	0.225435	124.281		0.0591052	53.348	14.3812	27.8557	0.681104	29.4155	0.0710408	9.45137	0.320418	14.0764	9.45137	0.0695351	27.8557	-2.12774e-16		1160.67	601.751	914.659	573.189	527.441	121.011	442.423	40.4124		51.6297	16.119	522.66	41.2644	411.183	507.057		82.6226	0.195269	5.90771	397167	0.206001
CP1803 S 161 8/20/2019 2:12:06 AM (Run: 1)			232.965	74.0696	40.4895	0.317944	825.975		0.0511566	6.27976	13.2758	3.24227	1.535	3.53295	0.147798	1.40334	0.352709	6.76601	1.40334	0.0753249	3.24227	0		1008.41	61.7717	1077.21	65.0815	944.501	21.7219	888.605	11.6489		17.5085	5.91803	939.67	12.1813	875.562	624.432		354.056	3.01806	1152.15	434519	20.53	9.71806	56.6647	4.7352	33.8999	14.1196
CP1803 S 162 8/20/2019 2:14:04 AM (Run: 1)			303.849	103.509	90.5209	0.340658	4052.45		0.0797795	2.26134	9.27349	2.2522	3.59984	2.86995	0.242117	1.77882	0.576575	4.13023	1.77882	0.107834	2.2522	0		1551.42	33.7702	1763.15	41.1614	1549.5	22.8057	1397.69	22.3518		20.7276	9.79691	1557.78	23.8049	1403.12	637.834		334.59	12.13	114.405	440781	0.780038		4.06222	0.0850589	1.55486	2.08692
CP1803 S 164 8/20/2019 2:17:58 AM (Run: 1)			57.0518	39.2144	12.5142	0.687347	865.15		0.0558392	7.69588	12.3305	7.7204	1.90877	8.60309	0.170699	3.79586	0.434458	5.85825	3.79586	0.0811	7.7204	2.37762e-16		1098.24	82.2644	1223.87	151.673	1084.16	57.323	1015.96	35.6791		16.9875	6.28994	1071.82	37.4464	987.548	1055.45		287.127	17.9709	443.505	449354	2.0881	0.426255	19.3505	0.210121	1.64613	1.39112
CP1803 S 167 8/20/2019 2:23:50 AM (Run: 1)			131.182	53.8341	17.6288	0.410377	154.272		0.0442131	8.00113	13.0923	4.47516	1.15713	5.59375	0.109875	3.35604	0.588191	9.10127	3.35604	0.0763808	4.47516	0		874.45	68.474	1105.05	89.4589	780.606	30.4677	672.021	21.4175		39.1866	13.9104	772.49	21.547	647.933	811.215
CP1803 S 169 8/20/2019 2:35:46 AM (Run: 1)			272.673	117.763	37.3377	0.431884	353.352		0.0495595	9.11863	13.137	5.28339	1.1393	7.92329	0.10855	5.90461	0.740493	9.21231	5.90461	0.0761209	5.28339	0		977.672	87.0285	1098.26	105.721	772.175	42.8451	664.324	37.2722		39.5111	13.9672	767.464	37.3179	636.474	910.666		145.224	4.19004	591.627	427747	7.33041		6.19551	0.0222794	0.650656	1.16571
CP1803 S 172a 8/20/2019 2:41:37 AM (Run: 1)			263.74	84.975	102.701	0.322192	1141.77		0.108853	5.86532	5.83419	1.8304	7.0579	4.37023	0.298645	3.96845	0.8953	3.34846	3.96845	0.171403	1.8304	2.47691e-16		2088.45	116.378	2571.39	30.595	2118.75	38.8676	1684.58	58.8306		34.4875	20.4916	2131.66	62.9255	1688.14	550.667		182.082	3.27377	270.41	438259	1.08417		9.30755		0.427785	0.499837
CP1803 S 172b 8/20/2019 2:41:37 AM (Run: 1)			502.599	64.4989	94.0459	0.128331	195.961		0.0939773	13.0203	7.59744	4.95623	2.78824	6.77091	0.153637	4.61314	0.67423	6.50884	4.61314	0.131623	4.95623	-1.56458e-16		1815.45	226.072	2119.75	86.8482	1352.39	50.6022	921.319	39.6042		56.5364	31.8747	1360.48	38.1729	911.231	268.997		192.43	2.89476	259.95	465158	1.16792		4.99038		0.700589	0.87316
CP1803 S 184 8/20/2019 3:09:10 AM (Run: 1)		m - bfir	50.9075	6.54034	4.04206	0.128475	301.719		0.0381606	38.3613	23.744	20.9322	0.424218	22.1014	0.0730536	7.09349	0.319538	13.6886	7.09349	0.0421159	20.9322	0		756.955	285.008	-219.579	526.5	359.063	66.8441	454.526	31.1314		306.999	-26.5869	351.018	32.7585	439.134	287.915		117.514		18.6572	430519	0.13726		0.0323264
CP1803 S 187b 8/20/2019 3:15:01 AM (Run: 1)			285.869	82.1405	102.29	0.287336	929.082		0.116389	8.83099	5.89933	3.10247	6.43459	4.67083	0.27531	3.49161	0.73395	3.63227	3.49161	0.169511	3.10247	0		2225.35	186.088	2552.81	51.9521	2037	41.0476	1567.7	48.5904		38.5892	23.0389	2045.33	51.2665	1554.27	157.682		124.89	2.2544	554.726	439814	1.39457		13.4981	0.118584	1.66745	1.25665
CP1803 S 193 8/20/2019 3:34:47 AM (Run: 1)			321.533	53.9598	49.501	0.16782	306.744		0.0563496	9.97695	13.5063	3.0088	1.37992	11.2573	0.135173	10.8477	0.961807	7.39791	10.8477	0.0740393	3.0088	-2.16672e-16		1108.01	107.571	1042.56	60.7102	880.406	66.2758	817.311	83.2695		21.6056	7.16662	878.298	84.7275	806.694	361.33		115.861	4.38946	369.688	433644	1.47287		6.72251		0.170674	0.850861
CP1803 S 198 8/20/2019 3:44:33 AM (Run: 1)			613.422	437.131	186.159	0.71261	4485.66		0.0777524	3.89891	10.3068	2.21422	2.91595	6.07903	0.217973	5.66143	0.924876	4.58773	5.66143	0.0970234	2.21422	-2.94014e-16		1513.44	56.8526	1567.66	41.4908	1386.06	45.9628	1271.15	65.3144		18.9139	8.28987	1414.63	68.1679	1294.27	417.163		392.664	9.11336	2288.91	452614	3.70619	26.4821	67.4487	4.66322	26.8576	18.8338
CP1803 S 199 8/20/2019 3:54:34 AM (Run: 1)			2.89421		#VALUE!		6.7459		0	#DIV/0!	14.9963	49.2765	0.771116	51.401	0.0838692	14.6247	0.284228	11.9233	14.6247	0.0666831	49.2765	0		0	#DIV/0!	827.924	1027.88	580.403	227.234	519.176	72.9511		37.2918	10.549	571.016	75.7192	#VALUE!	#VALUE!		85.8912	0.548803	15.8678	453658	0.162725
CP1803 S 204 8/20/2019 4:04:20 AM (Run: 1)			145.538	73.6968	83.9537	0.506377	692.714		0.140779	3.24435	5.09855	1.68454	11.3943	7.52066	0.421341	7.32957	0.970585	2.37338	7.32957	0.196134	1.68454	8.65932e-16		2662.17	80.924	2794.29	27.5726	2555.96	70.2023	2266.56	140.066		18.886	11.3224	2559.62	173.649	2249.95	562.992		115.052	5.37564	710.959	430689	0.573031	0.169033	6.52849	0.210001	2.95644	3.40225
CP1803 S 205 8/20/2019 4:06:17 AM (Run: 1)			604.422	148.255	47.9512	0.245284	928.39		0.0306988	6.68065	14.9954	2.78492	0.621375	3.77363	0.0675789	2.54646	0.651824	14.7975	2.54646	0.066687	2.78492	-2.49505e-16		611.156	40.2181	828.022	58.0917	490.709	14.6845	421.553	10.3912		49.0892	14.0931	490.198	10.3576	412.837	400.392		48.0739	2.319	42.9384	433814	0.208098		0.268492			0.274114
CP1803 S 210 8/20/2019 4:24:08 AM (Run: 1)			467.381	120.284	58.8021	0.257358	176.215		0.0395977	6.10075	14.3738	2.87812	1.03772	4.31442	0.108181	3.21413	0.729082	9.24379	3.21413	0.069571	2.87812	1.91882e-16		784.915	46.9679	915.704	59.2142	722.781	22.3094	662.174	20.2265		27.6869	8.38526	723.125	20.4577	657.068	368.832
CP1803 S 216 8/20/2019 4:35:52 AM (Run: 1)			113.492	73.6767	64.4653	0.649182	980.197		0.113486	4.58233	5.44527	1.8458	10.614	2.97636	0.419178	2.33489	0.752851	2.38562	2.33489	0.183646	1.8458	2.05333e-16		2172.72	94.3967	2686.07	30.5156	2489.94	27.6193	2256.75	44.4576		15.9835	9.3653	2487.18	55.3407	2255.56	986.128		153.966	10.0125	487.02	456366	1.47133		15.2561	0.02053	0.539922	2.49796
CP1803 S 225 8/20/2019 5:01:29 AM (Run: 1)		m - bfir	43.0896	1.59181	2.81687	0.0369418	16.6916		0.0857013	30.2457	15.4411	9.5981	0.533482	11.0333	0.0597443	5.44142	0.489542	16.738	5.44142	0.0647622	9.5981	-2.66077e-16		1661.97	482.562	766.592	202.193	434.118	38.9739	374.071	19.7754		51.2034	13.832	427.202	19.829	358.724	60.1675		64.4041	0.478612	75.2438	470376	0.0765563		0.00306144
CP1803 S 227 8/20/2019 5:05:23 AM (Run: 1)			318.149	101.254	98.1732	0.318259	3701.55		0.0753239	4.49397	9.28475	1.35267	3.77518	2.79368	0.254218	2.44437	0.842976	3.93363	2.44437	0.107703	1.35267	1.35744e-16		1467.84	63.6263	1760.93	24.7285	1587.48	22.4261	1460.19	31.9388		17.0784	8.01832	1596.71	33.9943	1474.38	549.217		201.438	8.80513	592.262	462787	2.47273		19.2746	0.0207527	1.09214	4.26648
CP1803 S 232 8/20/2019 5:23:12 AM (Run: 1)			225.405	62.7483	37.5668	0.278381	240.02		0.0493172	3.80361	12.9299	3.11311	1.53011	5.26689	0.143488	4.24837	0.796901	6.96924	4.24837	0.0773402	3.11311	0		973.006	36.1327	1129.97	62.0021	942.541	32.342	864.355	34.3656		23.5065	8.29525	936.768	35.0402	851.07	576.846		233.218	10.4803	1041.42	462259	2.74775	0.196365	8.70144	0.133868	3.38827	6.35113
CP1803 S 233 8/20/2019 5:25:09 AM (Run: 1)			575.378	201.792	98.4567	0.350713	586.62		0.083938	9.73979	9.8526	3.28621	1.78883	3.86572	0.127826	2.03582	0.499022	7.82314	2.03582	0.101496	3.28621	1.33588e-16		1629.11	152.446	1651.65	60.9109	1041.4	25.1772	775.451	14.8743		53.0499	25.5377	1047.85	14.7393	735.762	784.125		210.011	3.94531	539.383	452770	2.54167	6.96905	29.4689	2.18372	14.2251	5.26965
CP1803 S 237 8/20/2019 5:32:58 AM (Run: 1)		m - bfir	21.288	1.23439	1.60426	0.0579851	14.0232		0.158959	37.728	9.53849	11.2229	0.885421	13.275	0.0612531	7.09034	0.531808	16.3257	7.09034	0.104838	11.2229	1.74544e-16		2981.74	1045.91	1711.5	206.44	643.906	63.3004	383.242	26.3812		77.6078	40.4818	636.343	25.0648	350.909	100.092		102.652	0.212216	138.941	453624	0.214008	0.146188	0.201029
CP1803 S 239 8/20/2019 5:44:54 AM (Run: 1)		m - dp	470.255	139.419	60.5115	0.296476	544.058		0.0608992	8.96599	10.2829	6.06434	1.35501	8.34488	0.101054	5.73244	0.682425	9.89567	5.73244	0.0972489	6.06434	0		1194.88	104.028	1572.02	113.57	869.719	48.7528	620.585	33.916		60.5231	28.6454	870.96	32.8108	593.603	485.78		191.744	4.63595	823.853	463341	0.57045	45.6861	121.875	23.5828	165.811	45.5875
CP1803 S 244 8/20/2019 5:54:39 AM (Run: 1)			77.9926	37.5513	13.7994	0.481472	76.6483		0.0477926	10.9548	13.4654	5.49508	1.49506	6.27591	0.146008	3.03169	0.47175	6.84896	3.03169	0.0742647	5.49508	0		943.617	100.995	1048.67	110.776	928.378	38.1843	878.545	24.8995		16.223	5.3678	917.497	25.8323	857.526	740.987		240.825	3.58476	634.391	474742	2.20205		12.5126	0.0726698	2.09034	3.78943
CP1803 S 246 8/20/2019 5:58:33 AM (Run: 1)			297.566	157.848	49.2948	0.530465	486.598		0.0453012	5.24803	13.7911	3.39817	1.32958	5.26971	0.132988	4.02769	0.754177	7.51948	4.02769	0.0725105	3.39817	1.28875e-16		895.501	45.9703	1000.31	69.0077	858.697	30.5389	804.888	30.4762		19.5362	6.26632	855.21	31.1258	791.998	647.638		370.691	6.40533	856.029	461457	4.9726		35.9077	0.211619	3.7302	7.27157
CP1803 S 248 8/20/2019 6:02:27 AM (Run: 1)			1292.48	171.113	101.283	0.132391	3356.02		0.0532984	10.9229	13.4083	2.90099	0.672171	4.6228	0.0653662	3.59924	0.765678	15.2984	3.59924	0.0745805	2.90099	1.72708e-16		1049.55	111.716	1057.24	58.4056	522.031	18.8684	408.178	14.2359		61.3921	21.8097	529.811	13.9595	401.462	270.666		55.2807	3.45084	50.5566	477844	0.250183	30.6334	48.0845	9.19924	57.2838	4.61368
CP1803 S 257 8/20/2019 6:28:04 AM (Run: 1)		m - bfir	90.4437	31.79	6.99423	0.351489	0		0.0183552	23.3089	21.7759	16.7122	0.438192	17.4422	0.0692054	4.99339	0.28384	14.4497	4.99339	0.0459222	16.7122	0		367.635	84.9171	-6.49395	403.34	368.977	53.961	431.367	20.835		6742.59	-16.909	361.545	21.8522	425.663	575.416		93.3787		24.9596	429465	0.234431		0.221911
CP1803 S 263 8/20/2019 6:43:54 AM (Run: 1)			67.8023	18.9061	14.28	0.278842	130.285		0.136025	8.48321	8.40015	4.43662	2.58196	6.13877	0.157302	4.24275	0.683028	6.35719	4.24275	0.119046	4.43662	-1.85151e-16		2577.77	205.307	1941.95	79.3482	1295.54	44.9304	941.766	37.1752		51.5041	27.3068	1284.14	36.3693	857.425	402.846
CP1803 S 264 8/20/2019 6:45:51 AM (Run: 1)			71.5628	47.1415	12.2117	0.658744	54.11		0.0638501	10.2077	8.75881	4.72649	1.85373	8.03727	0.117758	6.50061	0.804769	8.49201	6.50061	0.114171	4.72649	0		1251.02	123.828	1866.84	85.2931	1064.76	53.0117	717.645	44.1483		61.5583	32.6001	1054.59	41.9408	647.668	762.41		108.909	7.74789	458.201	463554	1.93623	1.52138	19.3776	0.83222	7.22504	3.98474
CP1803 S 266 8/20/2019 6:49:45 AM (Run: 1)			505.596	133.788	40.0533	0.264614	4641.99		0.0276964	5.67593	15.6393	4.35855	0.600504	4.99599	0.0681135	2.44192	0.471502	14.6814	2.44192	0.0639413	4.35855	0		552.192	30.9178	739.69	92.2162	477.553	19.0331	424.78	10.0384		42.5733	11.0508	475.296	10.116	416.245	496.534		90.9379	1.9484	28.04	442421	0.233849	0.343889	1.12641	0.236961	1.55493	1.24913
CP1803 S 267 8/20/2019 6:51:41 AM (Run: 1)			43.132	30.5175	9.88383	0.707537	337.93		0.0593347	9.60817	14.327	5.8699	1.71821	7.47579	0.178538	4.62944	0.613173	5.60105	4.62944	0.0697981	5.8699	0		1165.05	108.775	922.436	120.639	1015.36	47.9822	1058.98	45.2099		-14.8028	-4.29672	1002.05	47.9005	1026.33	1517.14		266.232	21.3211	611.249	448579	2.07381		21.489	0.0511018	1.32421	2.99373
CP1803 S 268 8/20/2019 6:53:38 AM (Run: 1)		m - bfir	17.9601	0.547756	1.3046	0.0304986	21.0958		0.243639	47.1645	10.7276	21.7548	0.784452	22.9757	0.0610332	7.39	0.320405	16.3845	7.39	0.0932178	21.7548	0		4407.09	1867.59	1492.31	411.742	588.02	102.556	381.906	27.4031		74.4084	35.0522	580.575	27.4899	353.395	58.0818		153.478	0.295079	187.508	461703	0.188113
CP1803 S 269 8/20/2019 6:55:35 AM (Run: 1)			220.289	99.971	33.4829	0.453817	1832.78		0.0679224	7.78887	10.4363	3.21755	1.47881	3.73949	0.111933	1.90557	0.480085	8.93395	1.90557	0.0958194	3.21755	-1.43104e-16		1328.24	100.129	1544.22	60.4779	921.742	22.6522	683.962	12.3658		55.7084	25.7968	916.771	12.2289	630.901	#VALUE!		194.619	6.71738	715.69	454136	1.54071	20.2573	57.885	5.85295	32.998	10.655
CP1803 S 271 8/20/2019 6:59:30 AM (Run: 1)			88.3441	33.8478	21.7208	0.383136	327.619		0.106174	7.49413	9.35806	3.86509	2.77573	5.25395	0.188392	3.5588	0.666137	5.30809	3.5588	0.10686	3.86509	0		2039.55	145.388	1746.54	70.7853	1349.03	39.2186	1112.66	36.3684		36.2936	17.5218	1338.72	36.9752	1044.93	39.6179		139.273	2.74991	998.005	430435	1.60801		6.4324	0.181147	2.35279	6.86562
CP1803 S 272 8/20/2019 7:01:27 AM (Run: 1)			229.342	76.8374	18.5213	0.335034	155.895		0.0416626	6.11275	9.69911	4.95209	0.875454	6.80011	0.0615835	4.66029	0.678712	16.2381	4.66029	0.103102	4.95209	-1.51375e-16		825.021	49.4161	1680.71	91.448	638.525	32.231	385.248	17.4278		77.0782	39.6659	633.802	16.4041	355.683	18.6143		56.4427	3.39517	130.39	445787	0.362531	27.5255	77.5231	17.1469	141.884	60.2822
CP1803 S 273 8/20/2019 7:03:23 AM (Run: 1)			298.728	125.342	23.6543	0.419585	79.5113		0.0262775	5.34843	15.3193	3.11912	0.584131	4.35258	0.0649003	3.03579	0.681621	15.4082	3.03579	0.0652773	3.11912	0		524.267	27.6795	783.259	65.5311	467.113	16.2965	405.358	11.9269		48.2472	13.2204	462.723	11.8978	391.633	12.9047		60.0441	2.24678	60.2921	444980	0.196366	2.5509	3.6307	0.547486	4.11409	1.46242
CP1803 XS 11 8/22/2019 3:29:04 PM (Run: 1)			62.6982	130.034	44.5093	2.07396	0		0.112913	3.23028	5.37707	2.12807	10.2177	3.26256	0.39847	2.47298	0.720039	2.5096	2.47298	0.185975	2.12807	0		2162.32	66.2425	2706.89	35.1137	2454.68	30.1744	2161.99	45.4236		20.13	11.9236	2461.6	55.4799	2177.66	2902.36		448.352	7.61441	977.966	532374	2.36952		22.0604	0.0418823	2.08176	5.33566
CP1803 XS 12 8/22/2019 3:30:51 PM (Run: 1)			83.9593	42.6983	12.7485	0.508559	141.27		0.0401284	8.93131	14.6287	4.65532	1.14731	6.8228	0.121727	4.98784	0.722057	8.21513	4.98784	0.0683586	4.65532	0		795.231	69.6455	879.46	96.3208	775.971	37.015	740.494	34.8923		15.8013	4.57198	782.124	35.6356	744.354	808.729		193.802	7.45628	681.326	523277	2.00508		18.6984	0.0660831	1.74809	4.13908
CP1803 XS 124 12/3/2019 11:11:24 PM (Run: 1)			231.88	159.136	36.8907	0.686285	379.243		0.0344649	4.30191	13.685	2.97708	1.28623	5.33451	0.127662	4.42651	0.829516	7.83317	4.42651	0.0730729	2.97708	-2.66542e-16		684.874	28.9691	1016	60.3117	839.626	30.4736	774.515	32.3045		23.7684	7.75478	833.873	32.8271	774.758	1001.3		228.378	10.0427	1188.7	601982	3.83217	0.209388	55.0051	0.358044	5.63571	8.9973
CP1803 XS 125a 12/3/2019 11:13:22 PM (Run: 1)			588.68	180.538	108.79	0.306683	1421.68		0.0539562	5.89455	8.32244	5.20112	2.50354	5.65494	0.151114	2.21962	0.391997	6.61754	2.21962	0.120157	5.20112	0		1062.17	60.9933	1958.55	92.8402	1273.06	41.0304	907.203	18.7837		53.6798	28.7384	1271.42	19.1828	895.164	553.658		111.534	29.3662	444.33	538204	1.69787	13.3707	33.6917	3.97506	29.1478	8.10268
CP1803 XS 125b 12/3/2019 11:13:22 PM (Run: 1)			749.943	169.464	99.5018	0.225969	707.711		0.0509432	5.51229	9.48889	2.80539	1.59896	3.11594	0.11004	1.35604	0.433674	9.08758	1.35604	0.105386	2.80539	-4.6514e-16		1004.3	54.0072	1721.08	51.542	969.804	19.4651	672.982	8.6657		60.8976	30.6064	970.237	8.60059	659.486	297.603		155.871	4.38891	379.413	562251	1.245	9.07555	23.1914	2.87944	17.0741	3.36046
CP1803 XS 130a 12/3/2019 11:23:10 PM (Run: 1)			154.666	69.273	18.9384	0.447886	313.964		0.0290578	11.8844	12.0516	4.45989	1.17072	5.73803	0.102329	3.61031	0.62888	9.77244	3.61031	0.0829762	4.45989	-2.17881e-16		578.949	67.8286	1268.65	87.0584	786.98	31.4225	628.041	21.6047		50.4952	20.1961	781.911	21.4079	623.351	739.707		276.041	6.64698	675.796	525537	3.74275	9.77139	39.7079	2.70711	13.2654	4.91624
CP1803 XS 132b 12/3/2019 11:27:05 PM (Run: 1)			972.667	494.618	170.379	0.508517	3404.21		0.0426865	4.0614	10.8579	3.05062	1.78617	3.36218	0.14066	1.4135	0.41906	7.10935	1.4135	0.0920985	3.05062	2.05768e-16		844.88	33.6067	1469.42	57.9154	1040.43	21.886	848.392	11.2365		42.2633	18.4577	1041.53	11.4896	847.795	958.712
CP1803 XS 134 12/3/2019 11:31:01 PM (Run: 1)			971.794	336.894	101.78	0.346672	0		0.0367	4.59555	12.7536	4.47696	0.923742	7.32241	0.0854444	5.79435	0.791166	11.7035	5.79435	0.0784089	4.47696	1.36756e-16		728.498	32.8823	1157.26	88.808	664.337	35.7016	528.538	29.4035		54.3283	20.4412	665.337	28.9293	517.252	792.471
CP1803 XS 136 12/3/2019 11:34:57 PM (Run: 1)			488.847	160.91	41.5172	0.329162	2045.4		0.0327993	6.85683	12.5865	2.16582	0.757334	3.5113	0.0691337	2.76378	0.786446	14.4647	2.76378	0.0794505	2.16582	0		652.304	44.0133	1183.4	42.7985	572.471	15.365	430.934	11.5207		63.5851	24.7238	571.488	11.2347	416.829	#VALUE!		98.4018	2.55935	106.614	447915	0.272705	1.37856	3.48222	0.6688	4.53641	2.05032
CP1803 XS 138a 12/3/2019 11:38:53 PM (Run: 1)			275.054	287.732	56.1194	1.0461	2983.64		0.0495777	3.15439	13.5486	2.72117	1.45786	3.98022	0.143255	2.90471	0.72923	6.98057	2.90471	0.0738082	2.72117	-2.22309e-16		978.024	30.1162	1036.25	54.959	913.123	23.9715	863.041	23.4632		16.7146	5.48474	907.139	24.0861	833.629	#VALUE!
CP1803 XS 13a 8/22/2019 3:32:38 PM (Run: 1)			189.478	131.317	71.7253	0.69305	1206.23		0.0938613	2.92273	6.03854	2.54293	6.14342	3.67073	0.269055	2.64722	0.689653	3.71672	2.64722	0.165603	2.54293	-1.3189e-16		1813.31	50.6904	2513.68	42.7468	1996.44	32.0543	1536	36.18		38.8944	23.0629	1997.95	38.0314	1509.55	1003.79		793.185	3.92623	1156.59	523669	1.80594		22.1038	0.0671615	1.38994	3.34019
CP1803 XS 13b 8/22/2019 3:32:38 PM (Run: 1)			222.05	115.97	61.3501	0.52227	2096.13		0.0900504	10.3771	6.49314	3.4153	4.20902	6.39284	0.198214	5.40408	0.836468	5.04505	5.40408	0.154009	3.4153	0		1742.77	173.271	2390.91	58.1289	1675.78	52.4504	1165.72	57.6289		51.2437	30.4372	1680.29	55.9547	1125.61	753.199		956.313	9.03763	911.204	495647	1.57262		14.3871	0.142518	0.709654	1.70538
CP1803 XS 14 8/22/2019 3:34:26 PM (Run: 1)			67.9213	40.2282	38.2102	0.592277	742.397		0.111989	4.82826	5.28652	1.79608	10.8219	3.88036	0.414926	3.43967	0.863479	2.41007	3.43967	0.18916	1.79608	0		2145.53	98.283	2734.88	29.5588	2507.95	36.0677	2237.4	65.0237		18.1899	10.7874	2513.95	80.2236	2255.19	930.519		210.299	4.21627	522.983	514237	1.73952		11.6074		0.650621	1.31656
CP1803 XS 15 8/22/2019 3:36:14 PM (Run: 1)			465.649	331.638	84.8608	0.712207	473.651		0.0478883	8.69624	11.1638	5.56613	1.68374	6.16919	0.136328	2.66028	0.412553	7.33525	2.66028	0.0895754	5.56613	-2.39275e-16		945.463	80.3264	1416.5	106.434	1002.4	39.3	823.865	20.5744		41.8379	17.8106	1002.35	20.9756	808.322	1594.03		497.643	22.5548	1443.32	488112	3.62479	0.511636	38.5816	0.114237	2.59467	6.23528
CP1803 XS 16 8/22/2019 3:38:01 PM (Run: 1)			55.8861	44.9351	31.072	0.804047	176.433		0.112927	8.6197	5.84592	2.80301	9.2969	6.48173	0.394176	5.84431	0.893571	2.53694	5.84431	0.171059	2.80301	-2.18556e-16		2162.57	176.782	2568.05	46.8671	2367.71	59.4227	2142.16	106.518		16.5839	9.52603	2375.46	127.311	2155.7	992.033
CP1803 XS 17 8/22/2019 3:39:48 PM (Run: 1)			368.171	224.091	66.8865	0.608661	67305.6		0.044819	3.73575	13.4228	2.21124	1.4768	2.78368	0.143769	1.69094	0.542352	6.95562	1.69094	0.0745	2.21124	0		886.174	32.39	1055.06	44.5335	920.92	16.8531	865.938	13.7016		17.9254	5.9703	921.141	14.099	863.613	1301.91		266.736	6.55692	974.004	509495	4.28268	0.102078	23.9051	0.0747886	2.55967	3.42352
CP1803 XS 25 8/22/2019 4:01:41 PM (Run: 1)			401.587	201.778	117.846	0.502451	1480.26		0.0887388	2.85982	6.33224	1.46438	4.72342	2.64292	0.216926	2.20013	0.779744	4.60986	2.20013	0.157922	1.46438	2.73127e-16		1718.44	47.1131	2433.53	24.8153	1771.4	22.147	1265.61	25.2822		47.9927	28.553	1766.1	24.9801	1222.69	1021.63
CP1803 XS 28 8/22/2019 4:07:04 PM (Run: 1)			474.788	270.767	76.0953	0.57029	30030.4		0.0458665	3.82031	14.0328	1.55546	1.23288	2.62558	0.125476	2.11524	0.750429	7.96962	2.11524	0.0712618	1.55546	-1.3467e-16		906.428	33.8634	964.94	31.7586	815.649	14.7201	762.008	15.2021		21.0305	6.57644	814.983	15.4747	747.816	892.124
CP1803 XS 30 8/22/2019 4:10:39 PM (Run: 1)			296.052	108.073	46.6924	0.365046	714.026		0.042094	6.59135	13.8038	1.91183	1.32169	3.24362	0.13232	2.6203	0.771766	7.55742	2.6203	0.0724438	1.91183	-1.77851e-16		833.391	53.8147	998.432	38.8355	855.251	18.7493	801.088	19.739		19.7654	6.33295	857.635	20.1336	801.864	731.827		288.138	6.90711	432.468	504857	3.30119		24.9881	0.00317563	0.953986	3.46972
CP1803 XS 34a 8/22/2019 4:25:21 PM (Run: 1)			141.968	65.4002	20.7321	0.46067	0		0.0386982	9.44401	14.3441	5.65969	1.14135	8.35981	0.118739	6.15258	0.730015	8.42186	6.15258	0.069715	5.65969	0		767.42	71.1166	919.972	116.364	773.151	45.2437	723.3	42.0958		21.3781	6.44778	778.765	42.8199	727.123	999.548		347.185	2.35271	913.307	515291	4.17402		13.9889	0.041295	2.05624	3.70602
CP1803 XS 5 8/22/2019 3:10:48 PM (Run: 1)			1244.84	140.264	122.696	0.112676	1563.07		0.0526993	5.56202	13.5129	1.44768	0.89479	4.73545	0.0876937	4.50874	0.937808	11.4033	4.50874	0.0740034	1.44768	-5.35291e-16		1038.05	56.2788	1041.56	29.2153	648.94	22.7066	541.883	23.4334		47.9739	16.4972	642.358	23.2126	524.893	250.131		193.819	4.79385	288.841	509623	7.63774	1.44772	4.91665	0.763896	4.48123	2.31531
CP1803 XS 7 8/22/2019 3:14:23 PM (Run: 1)			3.71138	0.0798853	0.347062	0.0215245	1.7137		0.492793	86.0117	9.14604	28.9913	1.11198	30.8123	0.0737611	10.4357	0.337735	13.5573	10.4357	0.109337	28.9913	0		8097.97	5738.98	1788.4	528.199	759.125	164.726	458.776	46.2125		74.3471	39.5652	769.579	46.2026	435.577	63.0685		104.229	0.407427	28.162	536936	0.250534	0.451394	0.411013	0.0494669	0.583377
CP1803 XS 8 8/22/2019 3:16:10 PM (Run: 1)			223.093	103.662	88.3843	0.464659	958.943		0.105185	8.94914	5.4659	2.17519	7.44101	3.16429	0.29498	2.2981	0.684202	3.39006	2.2981	0.182952	2.17519	0		2021.47	172.152	2679.81	35.9826	2165.92	28.3233	1666.37	33.7455		37.8178	23.0641	2163.44	36.3815	1637.9	241.453		203.172	43.7241	513.988	519330	1.78103	2.33902	6.56392	0.439988	2.03185	3.29056
CP1803 XS 9 8/22/2019 3:17:58 PM (Run: 1)			91.7446	37.7197	18.311	0.411138	257.431		0.0581262	10.3294	11.4167	7.96356	1.93277	8.44373	0.160037	2.80682	0.319507	6.24855	2.80682	0.0875907	7.96356	-3.20868e-16		1141.98	114.689	1373.53	153.179	1092.5	56.5023	956.983	24.9621		30.3266	12.4042	1099.92	26.4186	954.97	672.05		408.432	12.1498	900.382	525769	6.6383		16.3126	0.0691165	1.72079	5.15689
Aug 19th, 2019 Experiment 1
Isotope ratio and date errors include systematic calibration errors of 0.70% (207Pb/206Pb) and 0.85% (206Pb/238U) (all 2-sigma).
Trace element concentrations were deleted from analyses known to have intersected inclusions of other minerals based on P and Ti.
Ablation used a laser spot size of 16 microns, and a laser firing repetition rate of 10 Hz.
Activity of TiO2 for Ti-in-Zircon temperature calculation is 0.8.
Aug 19th, 2019 Experiment 2
Isotope ratio and date errors include systematic calibration errors of 0.66% (207Pb/206Pb) and 0.76% (206Pb/238U) (all 2-sigma).
Trace element concentrations were deleted from analyses known to have intersected inclusions of other minerals based on P and Ti.
Ablation used a laser spot size of 16 microns, and a laser firing repetition rate of 10 Hz.
Activity of TiO2 for Ti-in-Zircon temperature calculation is 0.8.
Aug 22nd, 2019 Experiment 1
Isotope ratio and apparent dates include systematic calibration errors of 0.78% (207Pb/206Pb) and 1.03% (206Pb/238U) (all 2-sigma).
Trace element concentrations were deleted from analyses known to have intersected inclusions of other minerals based on P and Ti.
Ablation used a laser spot size of 16 microns, and a laser firing repetition rate of 10 Hz.
Activity of TiO2 for Ti-in-Zircon temperature calculation is 0.8.
Dec 3rd, 2019 Experiment 1
Isotope ratio and apparent age errors do NOT include systematic calibration errors of 0.11% (207Pb/206Pb) and 0.59% (206Pb/238U) (all 2-sigma).
Trace element concentrations were deleted from analyses known to have intersected inclusions of other minerals based on P and Ti.
Ablation used a laser spot size of 16 microns, and a laser firing repetition rate of 10 Hz.
Activity of TiO2 for Ti-in-Zircon temperature calculation is 0.8.
B1721A Quartz Arenite Xenolith, Dashwoods Pond/Bill Shears Pond (48.08233° N, 58.59601° W)
B1721A S 23 12/21/2017 11:54:57 AM (Run: 1)			2462.7	4921.98	268.772	1.99861	4217.03		0.0235848	5.08897	17.1274	4.28986	0.360741	10.5508	0.044811	9.6393	0.912541	22.3159	9.6393	0.0583861	4.28986	-2.2463e-16		471.165	23.7001	544.285	93.7559	312.768	28.4011	282.585	26.6508		48.0814	9.65019	37.9557	0.858099	0.001	0.478462		822.143	26.5833	7717.44	332065	15.2551	0.147374	314.034	2.02284	43.1338	67.3542
B1721A M 112 12/21/2017 3:26:01 PM (Run: 1)			2837.96	1040.67	259.487	0.366696	6472.78		0.0234232	7.75484	17.8752	1.35542	0.412415	7.93217	0.0534667	7.8155	0.983527	18.7032	7.8155	0.0559435	1.35542	-4.92124e-16		467.974	35.8737	450.147	30.105	350.612	23.5176	335.77	25.5704		25.4087	4.23328	37.7248	0.866563	0.001	0.476033		154.324	4.87539	3062.93	336235	14.9667		22.7942		0.443416	4.13433
B1721A S 28 12/21/2017 12:03:34 PM (Run: 1)			1545.12	314.972	110.663	0.203849	1666.99		0.026584	7.22726	16.9041	3.96831	0.44281	6.21784	0.0542884	4.78687	0.766206	18.4202	4.78687	0.0591574	3.96831	0		530.301	37.8278	572.923	86.3082	372.232	19.3766	340.796	15.8897		40.5162	8.44515	37.9098	0.859746	0.001	0.477986		192.343	29.578	1881.33	315029	5.03743	5.34361	92.8273	5.21742	42.9898	16.6301
B1721A S 44 12/21/2017 12:45:25 PM (Run: 1)			509.774	128.731	34.1091	0.252526	3829.47		0.0240553	18.2172	17.2774	7.33654	0.467894	7.83698	0.0586306	2.75563	0.346574	17.0559	2.75563	0.0578792	7.33654	3.44727e-16		480.453	86.4932	525.185	160.864	389.733	25.3648	367.292	9.83827		30.0642	5.75811	37.9683	0.857651	0.001	0.478592		153.585	4.08162	890.193	351539	1.06383		10.1038	0.160856	2.08233	4.45549
B1721A S 25 12/21/2017 11:58:24 AM (Run: 1)			630.147	717.314	56.9248	1.13833	0		0.0242113	7.0557	17.099	3.08784	0.47726	6.89876	0.0591867	6.16913	0.891683	16.8957	6.16913	0.0584831	3.08784	-3.7376e-16		483.533	33.7118	547.905	67.4442	396.192	22.6308	370.677	22.2225		32.3464	6.43987	37.9472	0.858403	0.001	0.478374		279.515	3.66478	583.83	329175	2.2282	0.53291	18.8898	0.353048	4.57031	5.70913
B1721A M 85 12/21/2017 2:24:55 PM (Run: 1)			1212.69	2181.17	125.746	1.79862	3803.98		0.0189537	4.75557	17.2968	3.65311	0.475148	5.16299	0.0596063	3.64846	0.700854	16.7767	3.64846	0.0578143	3.65311	-1.47119e-16		379.511	17.8795	522.754	80.132	394.738	16.8859	373.231	13.2305		28.6029	5.44856	37.8715	0.861137	0.001	0.477586		461.08	18.2452	3760.71	394542	4.16277	0.248161	105.209	2.3556	37.0868	48.208
B1721A S 19 12/21/2017 11:06:42 AM (Run: 1)			217.132	115.414	16.4613	0.53154	0		0.027096	9.41599	17.1129	6.57838	0.489753	8.52863	0.0607853	5.42793	0.63409	16.4513	5.42793	0.0584355	6.57838	0		540.381	50.208	546.094	143.731	404.742	28.469	380.4	20.0504		30.3417	6.01431	37.9623	0.857865	0.001	0.47853		319.297	10.2485	502.619	328511	2.64075	0.0817392	10.2347	0.109995	1.85109	3.41089
B1721A M 92 12/21/2017 2:44:05 PM (Run: 1)			1089.31	310.282	82.6692	0.284844	2826.41		0.0195393	5.49879	17.182	2.89179	0.492916	4.10255	0.0614249	2.91007	0.700171	16.28	2.91007	0.0582006	2.89179	2.28383e-16		391.123	21.3003	537.29	63.2769	406.896	13.7538	384.285	10.8562		28.4771	5.55687	37.8638	0.861417	0.001	0.477505		201.925	3.24216	1736.4	385696	3.2039	0.105283	14.9812	0.0283355	1.28384	3.08908
B1721A S 38 12/21/2017 12:27:57 PM (Run: 1)			311.914	104.325	22.7036	0.334466	2516.57		0.0268664	16.9947	16.2323	7.28995	0.5285	9.60514	0.0622191	6.25422	0.64932	16.0722	6.25422	0.0616056	7.28995	3.01071e-16		535.86	89.8715	660.419	156.256	430.814	33.722	389.107	23.6157		41.0818	9.681	37.9379	0.858735	0.001	0.478278		145.178	2.52235	647.26	329877	0.833425		6.25197	0.0888826	0.480577	2.39093
B1721A S 13 12/21/2017 10:56:22 AM (Run: 1)			600.689	163.385	45.1808	0.271995	1037.13		0.0292326	12.0908	17.2369	3.96768	0.499481	6.7912	0.062442	5.51161	0.808681	16.0149	5.51161	0.0580151	3.96768	1.65408e-16		582.382	69.4098	530.351	86.9198	411.351	22.9697	390.459	20.8818		26.3771	5.07881	37.8973	0.860197	0.001	0.477856
B1721A S 69 12/21/2017 1:42:50 PM (Run: 1)			163.941	104.2	12.7932	0.635595	489.701		0.0231139	11.234	18.2415	7.91157	0.479216	8.80425	0.0634001	3.86289	0.435543	15.7728	3.86289	0.0548201	7.91157	2.20218e-16		461.863	51.2973	404.87	177.118	397.535	28.9615	396.27	14.8465		2.12406	0.318078	37.9385	0.858715	0.001	0.478284		227.904	11.6931	555.318	329493	0.715988	0.0744981	12.4029	0.15311	3.23446	4.87831
B1721A S 46 12/21/2017 12:48:52 PM (Run: 1)			484.55	114.753	35.2831	0.236823	1399.57		0.0247708	12.979	17.2594	6.80366	0.511176	9.09001	0.0639874	6.02814	0.661173	15.6281	6.02814	0.0579395	6.80366	-1.71339e-16		494.57	63.4114	527.506	149.119	419.24	31.2212	399.83	23.3701		24.2038	4.6298	37.9007	0.860074	0.001	0.477892		181.495	4.12889	893.353	339640	4.25942	0.0499701	11.6687	0.134488	1.39279	4.11521
B1721A M 104 12/21/2017 3:08:33 PM (Run: 1)			328.181	500.138	30.7484	1.52397	601.401		0.0175251	6.23799	16.5251	5.60445	0.544886	6.75708	0.0653055	3.77469	0.554338	15.3127	3.77469	0.0605139	5.60445	-4.87286e-16		351.152	21.7157	622.016	120.894	441.641	24.1991	407.81	14.9168		34.4373	7.66027	37.9021	0.860024	0.001	0.477906		268.036	3.49343	579.932	390910	1.74807	2.68631	21.15	0.825072	7.10609	6.12382
B1721A S 1 12/20/2017 6:37:35 PM (Run: 1)			446.412	307.695	37.3539	0.689263	1592.78		0.0219126	6.57237	18.0253	2.75243	0.513452	7.36269	0.0671246	6.82886	0.84505	14.8977	6.82886	0.0554775	2.75243	-1.82942e-16		438.117	28.4849	431.495	61.3334	420.768	25.3628	418.809	27.6907		2.94	0.465507	37.8811	0.860786	0.001	0.477687		208.801	12.3559	1128.88	349915	1.31859	1.06163	34.6059	0.612925	7.82311	10.024
B1721A S 47 12/21/2017 12:50:35 PM (Run: 1)			150.345	118.318	12.8927	0.786973	979.451		0.0229826	6.02497	16.9794	5.69896	0.54784	7.60782	0.0674642	5.03992	0.659624	14.8227	5.03992	0.0588951	5.69896	0		459.271	27.3589	563.24	124.152	443.581	27.3412	420.86	20.5335		25.2787	5.12201	37.8935	0.860336	0.001	0.477816		187.489	2.36307	195.016	327075	0.53311	1.08056	8.8172	0.378523	2.42376	2.29031
B1721A S 58 12/21/2017 1:16:45 PM (Run: 1)			389.333	176.254	31.6766	0.452706	1268.33		0.0250943	5.5597	17.4574	2.73628	0.53513	7.14322	0.0677543	6.59836	0.921409	14.7592	6.59836	0.0572824	2.73628	-1.92282e-16		500.95	27.509	502.435	60.2303	435.209	25.2836	422.612	26.991		15.8874	2.89447	37.8667	0.861311	0.001	0.477536		262.709	8.60225	880.448	305573	3.53229	0.0168487	17.9255	0.0381516	1.35465	3.04217
B1721A S 24 12/21/2017 11:56:41 AM (Run: 1)			176.281	139.01	15.4547	0.788574	194.273		0.0239649	3.76379	17.3117	5.24699	0.543944	6.90034	0.0682956	4.48151	0.645946	14.6422	4.48151	0.0577644	5.24699	-1.43835e-16		478.669	17.8044	520.817	115.134	441.022	24.6844	425.879	18.469		18.2287	3.43359	37.8805	0.860807	0.001	0.477681		213	6.68969	438.498	318629	0.992356	0.0646991	8.74883	0.177662	2.93115	3.60007
B1721A M 89 12/21/2017 2:31:49 PM (Run: 1)			225.333	157.923	18.5106	0.700843	286.843		0.0178469	5.28539	16.7604	7.05443	0.564849	8.70027	0.0686618	5.09212	0.582816	14.5641	5.09212	0.0596644	7.05443	-3.78645e-16		357.542	18.7314	591.415	152.955	454.678	31.8876	428.089	21.0908		27.6162	5.84788	37.8724	0.861104	0.001	0.477596		321.986	11.7069	792.225	386104	2.5259		11.3932	0.117527	1.4369	2.22717
B1721A M 93 12/21/2017 2:45:48 PM (Run: 1)			134.22	59.1244	10.5538	0.440506	1099.13		0.0211912	13.1342	16.3491	10.5899	0.581639	11.6007	0.0689679	4.73597	0.406258	14.4995	4.73597	0.0611653	10.5899	0		423.844	55.0889	645.052	227.564	465.514	43.3172	429.935	19.6974		33.3488	7.64302	37.8772	0.860927	0.001	0.477646		224.086	3.47977	1023.33	400737	2.76432		8.08994		0.523728	4.50352
B1721A M 98 12/21/2017 2:54:26 PM (Run: 1)			243.325	225.896	21.4311	0.928369	520.93		0.0194987	9.23851	18.2109	8.86494	0.522613	10.4101	0.0690257	5.45735	0.522312	14.4874	5.45735	0.0549121	8.86494	1.41137e-16		390.318	35.7136	408.646	198.328	426.895	36.2806	430.283	22.7155		-5.2949	-0.793572	37.8652	0.861364	0.001	0.477521		174.243	8.84137	907.055	388142	1.17518	0.0357818	11.5849	0.512004	4.48536	5.74857
B1721A S 63 12/21/2017 1:32:30 PM (Run: 1)			224.95	159.092	19.7824	0.707233	513.222		0.0252398	5.4958	18.2255	3.7131	0.526051	6.49989	0.0695355	5.33493	0.817625	14.3811	5.33493	0.0548681	3.7131	1.71377e-16		503.818	27.3466	406.856	83.0959	429.185	22.7507	433.357	22.3593		-6.51351	-0.971952	37.8639	0.861412	0.001	0.477507		189.317	7.19474	633.467	320320	1.09004	0.0278092	15.676	0.164658	3.91544	5.91829
B1721A L 115 12/21/2017 3:31:15 PM (Run: 1)			268.912	168.187	22.7804	0.625435	1416.49		0.022138	4.69009	17.836	3.27264	0.539118	5.65605	0.0697399	4.61311	0.811411	14.339	4.61311	0.0560663	3.27264	-2.26434e-16		442.576	20.5316	454.97	72.6289	437.843	20.1166	434.588	19.3872		4.47983	0.743336	37.8562	0.861692	0.001	0.477426		367.357	11.6701	778.6	340772	3.59373		11.829	0.0472507	1.95736	1.12529
B1721A M 76 12/21/2017 2:02:16 PM (Run: 1)			329.028	220.668	27.7854	0.670667	847.216		0.018836	6.04652	17.3781	3.50392	0.555644	4.745	0.0700321	3.19962	0.667119	14.2792	3.19962	0.0575437	3.50392	-1.53635e-16		377.175	22.5945	512.427	76.9963	448.687	17.2089	436.349	13.4995		14.8465	2.74979	37.8469	0.862033	0.001	0.477329		210.74	7.37329	1055.87	392626	1.09	1.58383	23.0658	0.511519	5.9201	6.00529
B1721A L 123 12/21/2017 3:48:52 PM (Run: 1)			120.755	85.2839	10.6193	0.706253	30150.7		0.024736	9.32844	18.0034	4.64946	0.540909	6.294	0.0706283	4.24229	0.669921	14.1586	4.24229	0.055545	4.64946	-1.70259e-16		493.885	45.5135	434.244	103.554	439.024	22.4339	439.94	18.0409		-1.31167	-0.208598	37.8602	0.861547	0.001	0.477468		325.021	12.4554	481.179	323818	1.79961		8.43101	0.0501384	1.7304	2.84611
B1721A M 99 12/21/2017 2:56:09 PM (Run: 1)			392.403	594.743	41.1643	1.51564	434.831		0.0206471	4.73174	17.5668	2.83787	0.557926	5.58165	0.0710835	4.80639	0.857027	14.068	4.80639	0.0569255	2.83787	0		413.072	19.3471	488.639	62.615	450.175	20.2966	442.68	20.5628		9.40548	1.66504	37.8267	0.862774	0.001	0.477116		270.475	9.55341	1501.6	367117	3.4243	0.134701	17.88	0.5207	6.95267	8.44492
B1721A M 82 12/21/2017 2:19:46 PM (Run: 1)			267.184	205.336	23.3406	0.76852	592.034		0.0192805	7.78841	17.7233	3.88233	0.554145	5.27673	0.0712306	3.57371	0.671463	14.0389	3.57371	0.0564229	3.88233	-2.46844e-16		385.992	29.7774	469.063	85.9485	447.708	19.1041	443.565	15.3187		5.43585	0.925339	37.8381	0.862356	0.001	0.477236		321.083	12.5838	899.102	396486	3.60019		13.105	0.080946	1.73813	2.35384
B1721A M 100 12/21/2017 2:57:53 PM (Run: 1)			313.15	328.251	29.6294	1.04822	812.833		0.0203851	5.53101	17.8856	2.59764	0.551681	4.57532	0.0715634	3.76641	0.816853	13.9736	3.76641	0.0559108	2.59764	0		407.884	22.334	448.81	57.7103	446.097	16.5172	445.568	16.2151		0.722528	0.118674	37.8299	0.862657	0.001	0.47715		375.876	13.109	1097.5	376108	3.5934		16.2042	0.112791	1.74091	4.0357
B1721A M 102 12/21/2017 3:05:06 PM (Run: 1)			198.086	262.244	19.4307	1.32389	1474.54		0.0195298	3.64157	17.757	2.32268	0.556451	4.2533	0.0716631	3.5631	0.830508	13.9542	3.5631	0.0563158	2.32268	0		390.935	14.0994	464.805	51.4593	449.214	15.44	446.167	15.3597		4.00973	0.678198	37.8413	0.862237	0.001	0.47727		265.911	11.6399	1050.94	376209	1.76787	0.0885265	11.9151	0.398942	5.47046	7.8757
B1721A S 72 12/21/2017 1:55:10 PM (Run: 1)			97.6886	60.48	8.60341	0.619111	475.882		0.0260347	6.74539	16.589	12.5966	0.598347	13.1927	0.0719901	3.92073	0.295078	13.8908	3.92073	0.0602808	12.5966	2.71234e-16		519.485	34.5948	613.695	272.099	476.184	50.147	448.134	16.9733		26.9778	5.89055	37.8474	0.862013	0.001	0.477334		365.752	4.07057	802.325	325471	2.75397		11.3863		1.39257	3.60267
B1721A L 120 12/21/2017 3:39:53 PM (Run: 1)			244.965	169.073	21.9832	0.69019	1057.46		0.0242153	3.91703	17.32	3.19081	0.573116	5.43411	0.0719929	4.39867	0.804876	13.8903	4.39867	0.0577366	3.19081	1.21373e-16		483.611	18.7183	519.763	70.0283	460.028	20.1021	448.151	19.0431		13.7778	2.5817	37.8337	0.862516	0.001	0.47719		379.339	13.211	794.637	329743	3.48438		12.2175	0.220471	1.24481	2.76886
B1721A M 87 12/21/2017 2:28:21 PM (Run: 1)			416.255	122.591	33.5892	0.294509	1615.14		0.0204248	8.85302	17.4562	2.90609	0.568762	5.39822	0.0720077	4.54922	0.838275	13.8874	4.54922	0.0572863	2.90609	1.31797e-16		408.67	35.8164	502.585	63.9664	457.214	19.8726	448.24	19.6986		10.8131	1.96273	37.8153	0.863195	0.001	0.476995		182.728	2.41685	1009.97	386898	1.42795		8.10414	0.027413	0.984171	2.97523
B1721A L 122 12/21/2017 3:47:08 PM (Run: 1)			98.0819	68.9003	8.65936	0.702477	454.384		0.02304	6.2274	16.5161	3.46811	0.602571	5.05123	0.0721796	3.67248	0.721146	13.8543	3.67248	0.060547	3.46811	-2.62731e-16		460.403	28.3471	623.146	74.7984	478.864	19.2849	449.274	15.9377		27.9024	6.17926	37.846	0.862066	0.001	0.477319		280.456	9.08616	329.902	334788	0.869111		7.29331	0.0533993	1.02188	1.29591
B1721A M 77 12/21/2017 2:04:00 PM (Run: 1)			378.975	449.895	36.8834	1.18714	2445.39		0.0187872	4.86371	17.5397	2.33564	0.570282	4.1556	0.0725454	3.43713	0.819459	13.7845	3.43713	0.0570137	2.33564	-2.16482e-16		376.207	18.1284	492.099	51.502	458.197	15.3241	451.473	14.9868		8.25577	1.46762	37.8113	0.863342	0.001	0.476953		401.567	13.5384	1306.51	388417	4.70794	0.0222448	19.644	0.0996218	1.43026	3.12043
B1721A M 81 12/21/2017 2:18:03 PM (Run: 1)			398.706	278.487	35.6459	0.698476	157771		0.0199845	5.34238	17.8389	2.13738	0.56151	4.57754	0.0726483	4.04789	0.878397	13.7649	4.04789	0.0560571	2.13738	0		399.947	21.1567	454.628	47.4368	452.509	16.7138	452.091	17.6732		0.558003	0.0922946	37.8059	0.863541	0.001	0.476896		384.079	9.16408	984.325	387704	3.95436		15.2771	0.0487381	1.54926	2.94276
B1721A M 84 12/21/2017 2:23:12 PM (Run: 1)			97.8091	123.058	9.42914	1.25814	1140.2		0.0189985	6.31517	17.8147	6.77053	0.563731	8.15702	0.0728365	4.54939	0.554782	13.7294	4.54939	0.0561334	6.77053	0		380.399	23.7982	457.649	150.186	453.952	29.8587	453.222	19.9107		0.967401	0.160814	37.8383	0.862348	0.001	0.477238		205.096	11.8432	597.216	391623	1.17193	0.0496772	8.85665	0.257495	3.63464	4.07686
B1721A L 127 12/21/2017 3:55:45 PM (Run: 1)			97.8798	98.0861	9.31722	1.00211	1591.48		0.0222308	5.49857	16.8829	5.45598	0.596425	6.58089	0.0730302	3.67973	0.554633	13.693	3.67973	0.0592314	5.45598	-1.66794e-16		444.41	24.1695	575.602	118.612	474.963	24.9645	454.386	16.1445		21.059	4.33224	37.8361	0.862428	0.001	0.477215		198.953	10.3634	450.139	334745	0.807495		8.10916	0.254948	2.48842	4.14667
B1721A S 75 12/21/2017 2:00:32 PM (Run: 1)			104.864	86.3347	9.29619	0.823298	321.754		0.0192195	9.14656	17.8708	4.78362	0.564053	6.32027	0.0731077	4.13072	0.649383	13.6784	4.13072	0.0559571	4.78362	1.69612e-16		384.781	34.8613	450.64	106.242	454.161	23.1438	454.852	18.1411		-0.934703	-0.152111	37.8346	0.862484	0.001	0.477199		362.901	12.0468	1129.03	389484	1.43281		12.777	0.0831382	2.87	5.23
B1721A S 61 12/21/2017 1:29:04 PM (Run: 1)			164.747	97.9602	14.534	0.594609	909.446		0.0245162	5.52499	17.1463	3.10308	0.58867	5.35261	0.0732051	4.36134	0.810133	13.6602	4.36134	0.0583215	3.10308	1.24763e-16		489.549	26.7226	541.857	67.8469	470.018	20.1388	455.437	19.1777		15.949	3.10225	37.8274	0.862748	0.001	0.477124		234.723	8.68171	453.618	310066	1.15972		11.873	0.135903	1.65919	4.02522
B1721A L 119 12/21/2017 3:38:09 PM (Run: 1)			85.8544	53.2001	7.46025	0.619655	108.174		0.0220886	8.76699	17.982	4.40624	0.56521	6.16732	0.0737135	4.31519	0.695573	13.566	4.31519	0.0556112	4.40624	0		441.599	38.2951	436.84	98.0954	454.912	22.6133	458.489	19.0975		-4.95601	-0.786385	37.8301	0.862648	0.001	0.477152		266.12	10.4677	321.836	339887	1.16592		6.08867	0.110282	0.713815	1.92363
B1721A M 88 12/21/2017 2:30:05 PM (Run: 1)			257.009	357.721	26.3502	1.39186	894.402		0.0196857	4.88069	18.0576	3.33866	0.565149	6.10976	0.0740152	5.11689	0.833997	13.5107	5.11689	0.0553785	3.33866	0		394.025	19.0449	427.507	74.4486	454.873	22.4007	460.301	22.7318		-7.67099	-1.19333	37.8089	0.863432	0.001	0.476928		262.897	10.0847	1037.55	381155	2.2421	0.0491818	15.4905	0.45155	6.2681	8.3282
B1721A L 121 12/21/2017 3:45:25 PM (Run: 1)		z2	77.4989	41.8653	6.76765	0.540205	110.405		0.0242567	8.95943	17.2261	4.78598	0.597421	6.51132	0.074639	4.41494	0.674233	13.3978	4.41494	0.0580515	4.78598	-1.58025e-16		484.429	42.886	531.678	104.825	475.596	24.7264	464.044	19.7673		12.721	2.42895	37.8209	0.862989	0.001	0.477054		204.49	3.90007	549.206	327053	2.76796		7.84095		0.715998	2.49891
B1721A M 96 12/21/2017 2:50:59 PM (Run: 1)			123.963	82.7361	10.9398	0.667427	366.394		0.0203351	6.0954	17.9491	4.56728	0.574912	5.96702	0.0748416	3.83996	0.638758	13.3615	3.83996	0.055713	4.56728	1.91461e-16		406.893	24.5537	440.944	101.607	461.186	22.1173	465.259	17.2363		-5.51429	-0.883113	37.814	0.86324	0.001	0.476982		223.404	8.77099	407.057	375103	1.3666	0.0540722	9.10479	0.0746297	1.68621	1.4464
B1721A M 103 12/21/2017 3:06:50 PM (Run: 1)			171.024	198.437	16.6316	1.16029	2313.58		0.0190335	8.50686	18.2657	4.07371	0.565292	5.9254	0.0748872	4.30293	0.721893	13.3534	4.30293	0.0547475	4.07371	-1.92864e-16		381.093	32.1153	401.886	91.2473	454.965	21.7283	465.533	19.3253		-15.837	-2.32263	37.808	0.863464	0.001	0.476918		220.753	7.08625	653.737	375150	1.37298		10.5719	0.310543	3.48406	4.7028
B1721A M 113 12/21/2017 3:27:44 PM (Run: 1)			183.094	135.721	16.6757	0.741265	148.314		0.0211593	5.52709	18.613	3.67108	0.555528	4.79658	0.0749929	3.08712	0.636218	13.3346	3.08712	0.0537259	3.67108	-1.49542e-16		423.213	23.1482	359.561	82.8425	448.611	17.3936	466.167	13.8831		-29.6488	-3.91328	37.8046	0.863587	0.001	0.476883		254.659	9.86209	529.918	371156	2.31658		9.86771	0.065902	1.8662	1.45901
B1721A L 116 12/21/2017 3:32:59 PM (Run: 1)		z3	40.9555	28.7188	3.73092	0.701219	1638.05		0.0239464	10.5569	17.7147	7.83654	0.584806	9.12882	0.0751353	4.68229	0.510353	13.3093	4.68229	0.0564503	7.83654	3.62545e-16		478.305	49.9016	470.121	173.458	467.545	34.2042	467.02	21.0939		0.659623	0.112278	37.8187	0.863068	0.001	0.477032		161.478	7.6267	170.437	348098	0.463456		4.37335		0.527018	0.841623
B1721A M 106 12/21/2017 3:12:00 PM (Run: 1)			210.019	214.015	20.4535	1.01903	762.723		0.0210802	5.60837	18.0287	3.75547	0.574974	5.42244	0.0751816	3.91143	0.716182	13.3011	3.91143	0.0554671	3.75547	-1.1568e-16		421.647	23.4026	431.078	83.6907	461.227	20.1002	467.298	17.6313		-8.40229	-1.31636	37.8004	0.863746	0.001	0.476838		229.065	8.20245	699.071	375504	1.75652		12.2652	0.259935	2.94253	4.66477
B1721A L 117 12/21/2017 3:34:43 PM (Run: 1)		z4	79.3976	30.0116	6.75767	0.377991	332.846		0.0274859	9.5719	18.0843	5.62129	0.573795	6.98347	0.0752587	4.14366	0.58957	13.2875	4.14366	0.0552967	5.62129	1.43502e-16		548.051	51.7541	424.244	125.418	460.466	25.8529	467.76	18.6959		-10.2572	-1.58402	37.8132	0.86327	0.001	0.476974		196.895	4.32557	652.326	336719	2.50575		6.3154	0.0493182	0.344757	2.38224
B1721A M 111 12/21/2017 3:24:18 PM (Run: 1)			171.831	126.11	15.6105	0.73392	3818.84		0.0204756	4.83905	17.4946	3.80201	0.593885	5.84911	0.0753536	4.44486	0.755711	13.2708	4.44486	0.0571606	3.80201	2.00092e-16		409.676	19.6249	497.722	83.7574	473.346	22.1291	468.329	20.0784		5.90555	1.05982	37.8026	0.863661	0.001	0.476862		261.963	9.78586	566.209	371462	1.99993		8.99046	0.0881049	1.19757	1.70756
B1721A M 97 12/21/2017 2:52:42 PM (Run: 1)			122.207	84.0464	11.0708	0.687737	2310.64		0.0216353	7.89559	16.8913	3.80157	0.617267	5.45418	0.0756197	3.91103	0.711943	13.2241	3.91103	0.0592021	3.80157	0		432.632	33.7958	574.544	82.6598	488.133	21.1374	469.924	17.725		18.2093	3.73031	37.8054	0.863558	0.001	0.476892		261.393	5.54922	1238.01	370241	6.66801		15.6712	0.0453738	0.998541	5.23757
B1721A L 118 12/21/2017 3:36:26 PM (Run: 1)			75.1152	50.8846	6.89778	0.67742	218.72		0.0232089	6.80521	16.5425	3.87017	0.636312	5.79132	0.0763429	4.30827	0.739532	13.0988	4.30827	0.0604505	3.87017	2.00306e-16		463.741	31.1993	619.729	83.5166	500.02	22.8671	474.257	19.6988		23.4735	5.15241	37.8021	0.863682	0.001	0.476856		255.117	3.37746	596.409	333649	2.73791		8.71975		0.642679	1.83718
B1721A M 114 12/21/2017 3:29:28 PM (Run: 1)			80.3121	36.4991	6.93625	0.454466	2533.09		0.0217177	6.84579	16.0358	6.0878	0.658061	6.93207	0.0765341	3.31544	0.473514	13.0661	3.31544	0.0623606	6.0878	0		434.263	29.4117	686.527	129.925	513.428	27.9356	475.402	15.1945		30.7526	7.4062	37.7993	0.863783	0.001	0.476827		163.652	3.95742	738.447	373123	2.49623		6.07997		0.374068	1.50537
B1721A L 125 12/21/2017 3:52:19 PM (Run: 1)			78.5886	62.2369	7.61392	0.791932	123.453		0.0249797	6.36852	16.4299	4.25184	0.648364	6.22369	0.0772598	4.5449	0.726388	12.9433	4.5449	0.0608645	4.25184	0		498.69	31.3706	634.422	91.5293	507.471	24.8567	479.746	21.0124		24.3807	5.46345	37.7916	0.864071	0.001	0.476745		246.792	3.71224	568.41	337846	2.86456		9.89416		0.513029	3.87895
B1721A L 126 12/21/2017 3:54:02 PM (Run: 1)			43.4885	21.4858	4.03563	0.494056	145.865		0.0315505	21.5995	16.024	13.0242	0.667766	14.3842	0.0776056	6.10524	0.423195	12.8857	6.10524	0.0624065	13.0242	1.67361e-16		627.849	133.528	688.046	277.898	519.353	58.4796	481.815	28.3436		29.9735	7.22788	37.7916	0.86407	0.001	0.476745		141.469	6.16462	116.21	339164	0.399414		3.882		0.111516	0.467474
B1721A M 108 12/21/2017 3:15:27 PM (Run: 1)			163.523	163.664	16.0695	1.00086	181.923		0.0199989	6.62212	17.5042	3.58092	0.613047	6.67105	0.0778278	5.62849	0.840804	12.8489	5.62849	0.0571292	3.58092	-3.35312e-16		400.232	26.2432	496.52	78.9028	485.48	25.7437	483.144	26.1996		2.69402	0.481202	37.776	0.86465	0.001	0.476579		167.937	8.17808	732.78	373092	0.51995		13.6796	0.124226	2.58451	6.05342
B1721A M 94 12/21/2017 2:47:31 PM (Run: 1)			82.6525	77.0735	7.96751	0.932501	420.573		0.0204115	6.51827	18.0406	5.05361	0.595503	6.38164	0.0779171	3.89696	0.606255	12.8341	3.89696	0.0554306	5.05361	1.6971e-16		408.406	26.3538	429.62	112.648	474.376	24.1851	483.678	18.159		-12.5828	-1.961	37.7843	0.864339	0.001	0.476668		194.398	6.90586	343.535	363831	0.675356		6.28451	0.0325804	1.9466	2.24512
B1721A M 83 12/21/2017 2:21:29 PM (Run: 1)			167.462	75.7474	15.2536	0.452324	584.931		0.022878	8.70897	15.6677	6.97363	0.700533	7.94699	0.0796038	3.81094	0.475936	12.5622	3.81094	0.0638254	6.97363	2.54904e-16		457.203	39.3707	735.872	147.635	539.109	33.2412	493.757	18.1142		32.9017	8.41238	37.7543	0.865455	0.001	0.476349		182.954	9.11271	843.713	371634	1.42746	0.0656542	11.4449	0.0382849	0.977589	2.55989
B1721A M 110 12/21/2017 3:18:54 PM (Run: 1)			58.6451	46.2501	5.62225	0.788643	304.816		0.020662	11.5807	17.8694	8.06901	0.619556	9.20996	0.0802952	4.4401	0.479421	12.454	4.4401	0.0559615	8.06901	-1.86128e-16		413.367	47.3845	450.827	179.202	489.569	35.7744	497.885	21.2744		-10.4381	-1.6986	37.7606	0.865224	0.001	0.476415		174.429	2.83289	430.737	372462	1.9858		7.17895		0.383863	1.84156
B1721A L 124 12/21/2017 3:50:35 PM (Run: 1)			78.1377	28.72	7.09182	0.367557	540.298		0.0262353	8.67302	17.3869	5.99498	0.646484	6.79889	0.0815228	3.20705	0.46668	12.2665	3.20705	0.0575145	5.99498	1.73867e-16		523.435	44.8148	511.287	131.762	506.313	27.1062	505.206	15.5836		1.18941	0.218616	37.745	0.865806	0.001	0.476249		235.885	1.56487	361.577	333800	2.27592		5.46958	0.021327		0.765764
B1721A M 78 12/21/2017 2:05:43 PM (Run: 1)			130.027	106.117	13.3895	0.81612	5235.61		0.0233002	8.44368	17.9216	4.82403	0.64491	5.62512	0.0838253	2.89321	0.507626	11.9296	2.89321	0.0557985	4.82403	4.8296e-16		465.543	38.8598	444.359	107.255	505.341	22.3933	518.915	14.425		-16.7785	-2.68609	37.7125	0.867025	0.001	0.475902		180.745	8.74036	420.721	392492	0.495713		11.0266	0.091535	1.97491	3.05134
B1721A M 107 12/21/2017 3:13:43 PM (Run: 1)			229.777	579.322	65.4666	2.52123	11975.8		0.0443722	4.71749	13.6333	1.8795	1.63697	4.02018	0.161861	3.55378	0.876326	6.17816	3.55378	0.0733498	1.8795	-2.64889e-16		877.53	40.5116	1023.64	38.0325	984.547	25.3403	967.108	31.9151		5.52286	1.77124	36.7984	0.904277	0.001	0.465414		270.025	12.6459	2095	376753	2.79544	0.213439	58.5877	1.43169	17.1862	24.5426
DISCORDANT ANALYSES
B1721A S 52 12/21/2017 1:06:23 PM (Run: 1)			3696.6	1990.91	460.16	0.538578	11301		0.0260226	6.70188	17.2324	1.62794	0.191592	21.606	0.0239455	21.5446	0.996923	41.7616	21.5446	0.0580302	1.62794	-4.41665e-16		519.245	34.356	530.89	35.6604	177.987	35.2741	152.543	32.479		71.2665	14.2953	37.4283	0.878026	0.001	0.472789		203.114	5.40654	2980.28	300576	24.8277	4.00766	41.4315	1.98333	14.2362	7.88438
B1721A M 91 12/21/2017 2:42:21 PM (Run: 1)			3119.17	6813.34	481.937	2.18434	1524.18		0.0273965	10.2274	15.4309	3.7517	0.380429	31.9131	0.042576	31.6918	0.992958	23.4874	31.6918	0.064805	3.7517	0		546.292	55.1229	768.009	79.0139	327.354	89.3015	268.78	83.4299		65.003	17.8931	37.6048	0.871127	0.001	0.474737		1056.01	18.6991	12569	373061	29.4408	0.498691	538.674	1.7082	38.071	100.105
B1721A S 37 12/21/2017 12:26:13 PM (Run: 1)			3250.77	655.955	262.283	0.201785	2419.23		0.0304654	7.98598	15.6739	3.68154	0.368769	34.4901	0.0419208	34.2931	0.994195	23.8545	34.2931	0.0638004	3.68154	-7.52522e-16		606.577	47.7215	734.997	77.9526	318.741	94.3516	264.728	88.9447		63.9824	16.9456	37.8218	0.862953	0.001	0.477065		313.732	6.01129	3288.41	318634	10.1337	5.53175	39.6524	1.83049	16.0937	7.94676
B1721A S 21 12/21/2017 11:17:17 AM (Run: 1)			824.845	337.133	95.7993	0.408722	227.266		0.0673063	9.64407	7.7483	5.59166	1.30947	11.6194	0.0735871	10.1855	0.875674	13.5893	10.1855	0.129061	5.59166	-1.33089e-16		1316.58	122.925	2085.21	98.3651	849.895	66.8957	457.731	45.0054		78.0487	46.1427	37.7243	0.866582	0.001	0.476028		309.843	11.8276	1856.61	314348	2.66085	10.1759	87.0249	3.99512	26.0888	14.0719
B1721A S 43 12/21/2017 12:43:42 PM (Run: 1)			332.907	93.5107	30.8174	0.280891	497.475		0.0438069	16.0718	13.1887	10.2552	0.812308	13.0795	0.0777004	8.11811	0.619648	12.87	8.11811	0.0758222	10.2552	-3.27804e-16		866.585	136.332	1090.4	205.447	603.748	59.5265	482.382	37.731		55.7612	20.1021	37.7692	0.864901	0.001	0.476507		188.699	12.7345	623.962	306717	0.879562	0.288334	14.6775	0.191018	1.77732	2.40638
B1721A S 39 12/21/2017 12:29:40 PM (Run: 1)			349.686	220.227	48.5924	0.629786	128.229		0.0730063	11.2478	5.92677	4.69975	1.88006	9.1927	0.0808143	7.90051	0.857934	12.374	7.90051	0.168726	4.69975	1.8839e-16		1424.24	154.681	2545.04	78.759	1074.08	60.9317	500.982	38.0812		80.3154	53.3573	37.7121	0.867041	0.001	0.475897
B1721A S 17 12/21/2017 11:03:15 AM (Run: 1)			350.154	143.318	66.0686	0.409301	77.2119		0.165446	10.4195	4.33176	4.25396	3.11117	10.7801	0.0977431	9.90522	0.91783	10.2309	9.90522	0.230853	4.25396	1.69554e-16		3094.55	298.965	3057.97	68.0483	1435.45	82.8341	601.169	56.8549		80.3409	58.1199	37.4978	0.875282	0.001	0.473563
B1721A S 68 12/21/2017 1:41:06 PM (Run: 1)			340.156	65.4098	37.0787	0.192294	549.243		0.0823723	71.0739	12.5593	13.7548	0.983227	26.0765	0.0895605	22.1538	0.84938	11.1656	22.1538	0.0796226	13.7548	0		1599.9	1093.27	1187.64	271.644	695.259	131.269	552.937	117.39		53.4423	20.4703	37.6346	0.86998	0.001	0.475062		158.649	4.51425	793.5	287780	1.28279	0.910893	17.2479	0.152671	4.8079	5.09843
B1721A S 2 12/20/2017 6:39:18 PM (Run: 1)			250.884	136.689	23.8066	0.544831	302.257		0.0393369	9.22723	9.6072	7.86328	1.00631	11.3102	0.0701174	8.12959	0.673699	14.2618	8.12959	0.104089	7.86328	0		779.843	70.5874	1698.27	144.885	707.006	57.6016	436.863	34.3385		74.2759	38.2095	37.8629	0.861449	0.001	0.477496		415.378	4.39512	1310	356149	3.87945	5.38771	28.0278	1.85826	12.0253	6.74378
B1721A S 7 12/20/2017 6:47:53 PM (Run: 1)			293.06	87.7098	23.7274	0.299289	313.755		0.0468781	11.5579	10.9422	10.0409	0.80606	12.8971	0.0639691	8.09415	0.587888	15.6326	8.09415	0.0913894	10.0409	1.67639e-16		925.969	104.608	1454.73	191.002	600.241	58.4462	399.718	31.3712		72.5228	33.407	37.9235	0.859252	0.001	0.478129		155.75	15.214	432.862	389158	1.33933	3.36171	18.4476	0.992045	5.24178	3.4795
B1721A S 5 12/20/2017 6:44:27 PM (Run: 1)			352.539	154.697	23.0263	0.438807	0		0.0234521	11.039	14.7027	7.0962	0.511232	7.26721	0.0545147	1.56724	-0.148293	18.3437	1.56724	0.0680147	7.0962	3.01899e-16		468.545	51.1277	868.981	147.068	419.277	24.9623	342.18	5.22295		60.6229	18.3881	38.0385	0.85517	0.001	0.479313		227.834	6.99815	726.831	410030	0.382245	0.608727	32.9744	0.735513	9.06808	5.62558
B1721A S 4 12/20/2017 6:42:44 PM (Run: 1)			1292.93	318.622	89.0133	0.246435	4841.36		0.0307315	14.8214	15.974	8.3709	0.478101	9.54426	0.0553902	4.58486	0.38565	18.0537	4.58486	0.0626016	8.3709	-5.78201e-16		611.796	89.318	694.699	178.415	396.77	31.3464	347.53	15.5119		49.974	12.4101	37.9664	0.857717	0.001	0.478573		171.763	2.03324	795.538	389367	2.25441	0.1835	13.1465	0.0223954	0.602423	0.933074
B1721A S 60 12/21/2017 1:20:11 PM (Run: 1)			116.089	66.7026	9.36501	0.574583	449.49		0.0255062	12.5419	15.3658	9.23347	0.589593	9.94491	0.0657061	3.69381	0.368458	15.2193	3.69381	0.0650796	9.23347	3.93043e-16		509.07	63.0499	776.931	194.183	470.607	37.4539	410.234	14.6812		47.1981	12.8288	37.9159	0.859526	0.001	0.47805		244.245	12.036	375.829	324805	0.687693	0.172746	10.0663	0.11623	1.50464	2.40283
B1721A S 12 12/21/2017 10:54:39 AM (Run: 1)			1415.29	2013.69	146.486	1.42281	8080.83		0.0258211	6.86598	15.7267	2.87575	0.469071	6.74975	0.0535026	6.10649	0.902065	18.6907	6.10649	0.0635862	2.87575	0		515.275	34.9316	727.892	60.9606	390.547	21.8833	335.99	19.9917		53.8407	13.9695	37.9067	0.859859	0.001	0.477954		215.993	3.58708	839.285	303724	1.4591	0.341277	21.9571	0.497227	4.57318	6.13465
B1721A S 65 12/21/2017 1:35:57 PM (Run: 1)			681.671	705.738	59.244	1.03531	0		0.0242461	6.21221	15.4021	5.76035	0.518285	9.97073	0.057896	8.13842	0.814886	17.2724	8.13842	0.064926	5.76035	3.03883e-16		484.219	29.7232	771.958	121.24	424.005	34.5599	362.817	28.712		53.0004	14.4309	37.962	0.857874	0.001	0.478527		219.117	10.1636	539.555	341191	0.889794	12.0493	76.1862	5.41768	31.1161	12.125
B1721A S 57 12/21/2017 1:15:01 PM (Run: 1)			935.826	807.984	80.7957	0.863392	1632.35		0.0261686	13.6022	14.8422	12.3312	0.536516	14.6735	0.0577535	7.95311	0.541071	17.315	7.95311	0.0673757	12.3312	0		522.121	70.1104	849.399	256.353	436.125	52.0246	361.949	27.993		57.3877	17.008	37.9424	0.858576	0.001	0.478324		353.152	13.1658	2476.61	334574	3.61996	1.23238	65.8816	1.02682	17.4595	31.74
B1721A S 49 12/21/2017 12:54:02 PM (Run: 1)			1185.95	1689.07	122.603	1.42423	1687.44		0.0250471	6.23807	14.5387	12.8136	0.563238	13.8704	0.0593904	5.31029	0.38137	16.8378	5.31029	0.0687819	12.8136	2.22769e-16		500.02	30.8089	892.222	264.59	453.632	50.7441	371.917	19.1909		58.3157	18.0134	37.9	0.860102	0.001	0.477884		635.091	24.981	4554.57	307148	4.5037	1.24052	120.387	1.61184	23.1108	40.0177
B1721A S 36 12/21/2017 12:24:30 PM (Run: 1)			1303.22	1308.06	122.73	1.00372	982.337		0.0287313	4.3747	14.2402	8.36282	0.550047	9.57089	0.0568087	4.65458	0.483883	17.6029	4.65458	0.0702238	8.36282	1.96166e-16		572.536	24.6953	934.907	171.542	445.028	34.4856	356.188	16.1293		61.9012	19.9627	37.9268	0.859134	0.001	0.478163		774.292	30.4042	3838.55	312902	11.456	1.92806	179.9	2.29251	27.7722	34.456
B1721A S 64 12/21/2017 1:34:14 PM (Run: 1)			974.934	248.042	85.6385	0.254419	658.742		0.0421643	17.2253	13.5959	10.006	0.688798	11.2018	0.0679204	5.03595	0.447632	14.7231	5.03595	0.0735513	10.006	-1.49126e-16		834.754	140.86	1029.19	202.305	532.078	46.3908	423.614	20.6472		58.8402	20.3849	37.8014	0.863708	0.001	0.476849		262.976	4.24154	1326.55	304501	2.19355	0.0932912	16.7117	0.157198	2.28621	2.53482
B1721A S 48 12/21/2017 12:52:19 PM (Run: 1)			693.948	780.605	71.528	1.12488	801.173		0.0278139	7.7898	13.4592	8.94429	0.672192	10.5412	0.0656162	5.57831	0.527336	15.2402	5.57831	0.0742988	8.94429	1.45028e-16		554.502	42.6075	1049.58	180.286	522.045	43.0258	409.69	22.1427		60.9663	21.522	37.8595	0.861572	0.001	0.477461		381.298	20.4103	1921.47	310964	2.76269	3.88758	75.0475	2.44405	28.0564	31.6152
B1721A M 109 12/21/2017 3:17:10 PM (Run: 1)			223.78	111.579	22.0279	0.49861	819.596		0.0322252	9.37734	12.7025	7.08563	0.862404	8.00848	0.079451	3.73223	0.462373	12.5864	3.73223	0.0787245	7.08563	-2.58219e-16		641.066	59.1716	1165.21	140.392	631.434	37.6545	492.845	17.7085		57.7033	21.9483	37.749	0.865655	0.001	0.476292		213.129	12.4683	640.136	367270	0.984531	0.315688	17.5202	0.459472	7.46756	10.0793
B1721A S 59 12/21/2017 1:18:28 PM (Run: 1)			839.3	79.2878	59.157	0.094469	804.565		0.0609117	18.3236	13.6659	6.35939	0.596266	9.91369	0.0590987	7.60522	0.765696	16.9208	7.60522	0.0731747	6.35939	1.4994e-16		1195.12	212.64	1018.8	128.78	474.862	37.6011	370.142	27.3572		63.6687	22.0526	37.9354	0.858826	0.001	0.478252		138.37	7.20323	514.813	329172	0.877451	0.557152	18.7434	0.814014	4.29825	3.48741
B1721A S 6 12/20/2017 6:46:10 PM (Run: 1)			130.105	63.8133	10.9953	0.490476	132.268		0.0307643	14.5931	12.9688	14.1677	0.73394	15.1855	0.0690336	5.46583	0.309996	14.4857	5.46583	0.0771079	14.1677	-5.14003e-16		612.44	88.0335	1124	282.415	558.863	65.2656	430.331	22.7532		61.7143	22.9989	37.8871	0.860568	0.001	0.47775		175.571	6.36549	583.883	364814	0.59486	0.0778184	7.9735	0.110895	2.26117	2.40907
B1721A M 101 12/21/2017 3:03:22 PM (Run: 1)			946.526	1273.98	108.674	1.34596	595.231		0.0262862	7.65768	12.8311	1.88618	0.742769	4.82946	0.069122	4.44589	0.915483	14.4672	4.44589	0.0779356	1.88618	0		524.437	39.6432	1145.25	37.4812	564.02	20.8998	430.864	18.5296		62.3782	23.6084	37.7798	0.864506	0.001	0.47662		242.011	63.9008	1564.04	363229	1.88713	15.9355	227.491	15.5582	149.986	63.4596
B1721A S 31 12/21/2017 12:15:53 PM (Run: 1)			785.198	128.062	55.0742	0.163095	782.068		0.0422324	6.80055	13.1766	3.16747	0.610867	6.39077	0.058378	5.5506	0.865465	17.1297	5.5506	0.0758921	3.16747	2.03502e-16		836.075	55.6978	1092.22	63.4385	484.107	24.6077	365.754	19.7363		66.5129	24.4478	37.9532	0.858188	0.001	0.478437		93.6802	13.4247	771.582	326152	3.44678	18.3208	113.461	5.48807	28.2572	10.6792
B1721A M 90 12/21/2017 2:33:33 PM (Run: 1)			550.49	120.939	49.871	0.219694	549.809		0.0473307	11.2369	12.3835	5.61528	0.822275	7.18815	0.0738517	4.48755	0.62091	13.5407	4.48755	0.0807524	5.61528	1.41659e-16		934.705	102.641	1215.42	110.451	609.317	32.9344	459.319	19.895		62.2091	24.6174	37.7739	0.864727	0.001	0.476557		117.222	7.05388	1093.89	378637	1.0237	2.61903	27.2221	1.29312	14.8137	6.24512
B1721A S 32 12/21/2017 12:17:37 PM (Run: 1)			433.108	469.047	51.3196	1.08298	494.828		0.0263323	6.71204	11.6451	5.18667	1.00999	6.15935	0.0853017	3.32205	0.534032	11.7231	3.32205	0.0858729	5.18667	-2.00284e-16		525.345	34.8071	1335.34	100.296	708.867	31.4258	527.69	16.8318		60.4828	25.5586	37.6741	0.868477	0.001	0.475489		427.805	11.7781	2756.29	286058	2.1241	0.851562	40.6402	0.591717	7.76784	17.0334
B1721A M 79 12/21/2017 2:07:26 PM (Run: 1)			1722.7	436.936	142.305	0.253634	476.005		0.0352608	4.89795	12.9356	2.90115	0.59704	6.43773	0.0560131	5.74698	0.889749	17.853	5.74698	0.0773058	2.90115	0		700.419	33.7186	1129.06	57.7888	475.353	24.4371	351.334	19.6507		68.8828	26.09	37.8414	0.862233	0.001	0.477271		265.897	3.02443	2736.56	382652	4.41492	0.132724	13.8572	0.142883	2.23501	4.33844
B1721A S 30 12/21/2017 12:07:01 PM (Run: 1)			346.442	123.957	35.4969	0.357799	257.528		0.0449274	7.51764	11.6482	5.76577	0.977772	8.25221	0.0826028	5.90381	0.713188	12.1061	5.90381	0.0858503	5.76577	-2.01039e-16		888.271	65.3309	1334.8	111.504	692.462	41.4249	511.64	29.0386		61.6693	26.1129	37.7121	0.86704	0.001	0.475897		215.121	4.71577	992.747	299539	0.758773	4.32975	25.5713	1.57839	13.0897	7.35706
B1721A S 70 12/21/2017 1:44:33 PM (Run: 1)			304.262	82.4316	23.6437	0.270923	260.378		0.0457272	9.18936	12.0579	6.59185	0.718097	7.30121	0.0627993	3.1393	0.425206	15.9237	3.1393	0.0829329	6.59185	1.64896e-16		903.736	81.2183	1267.65	128.692	549.543	30.9856	392.627	11.9579		69.0271	28.5538	37.9354	0.858827	0.001	0.478252		94.5481	4.98743	526.616	337736	0.837649	0.638255	8.03172	0.392635	1.58837	2.66337
B1721A S 62 12/21/2017 1:30:47 PM (Run: 1)			1264.18	1240.08	126.028	0.980933	368.769		0.0314601	12.6967	12.1959	16.9944	0.666859	18.2413	0.0589855	6.62845	0.362473	16.9533	6.62845	0.081995	16.9944	0		626.08	78.2729	1245.39	332.839	518.801	74.1005	369.453	23.8005		70.3344	28.7872	37.8969	0.860214	0.001	0.477852		500.439	17.8026	2711.13	334152	6.95941	1.79418	94.2435	1.73535	13.5764	21.213
B1721A M 105 12/21/2017 3:10:17 PM (Run: 1)		z5	759.565	323.546	74.6105	0.425963	600.966		0.0408387	12.9125	11.4475	8.50611	0.865116	9.7402	0.0718263	4.74526	0.484816	13.9225	4.74526	0.0873554	8.50611	-3.64383e-16		809.029	102.403	1368.32	163.735	632.912	45.8739	447.149	20.4992		67.3214	29.3505	37.7723	0.864785	0.001	0.476541
B1721A S 74 12/21/2017 1:58:44 PM (Run: 1)			1458.98	272.011	115.92	0.186439	906.648		0.0541187	8.94171	12.0771	5.98378	0.655493	8.77173	0.0574155	6.41386	0.729255	17.4169	6.41386	0.0828014	5.98378	0		1065.28	92.7878	1264.54	116.873	511.854	35.266	359.889	22.4503		71.5399	29.6891	37.8917	0.860402	0.001	0.477798		239.141	10.8656	1606.32	328693	4.27391	2.57432	37.2423	1.94395	9.40639	6.45744
B1721A S 18 12/21/2017 11:04:58 AM (Run: 1)			511.863	160.635	45.1802	0.313824	833.416		0.0481912	5.91941	11.5869	6.70837	0.793781	8.64686	0.0667062	5.45581	0.628656	14.9911	5.45581	0.0863045	6.70837	-1.95959e-16		951.305	55.007	1345.01	129.548	593.314	38.8526	416.281	21.9937		69.0501	29.8381	37.8536	0.861788	0.001	0.477399		211.757	12.0536	934.874	315623	1.65845	22.0227	129.441	7.92614	45.9504	15.7641
B1721A M 80 12/21/2017 2:09:10 PM (Run: 1)			796.995	247.43	73.6917	0.310454	282.059		0.0424299	6.14129	11.3679	5.05445	0.851653	7.40279	0.0702172	5.40868	0.727898	14.2415	5.40868	0.0879667	5.05445	0		839.903	50.5239	1381.77	97.111	625.556	34.5723	437.464	22.876		68.3404	30.068	37.7892	0.864158	0.001	0.47672		160.34	9.57237	1360.18	386178	3.70104	0.835174	27.407	0.475487	3.69319	4.78363
B1721A S 51 12/21/2017 1:04:39 PM (Run: 1)			734.193	333.577	63.2997	0.454345	636.78		0.0364772	7.2327	11.5896	15.0507	0.752291	15.465	0.0632345	3.55555	0.227927	15.8142	3.55555	0.0862841	15.0507	2.6924e-16		724.153	51.4487	1344.56	290.668	569.553	67.4153	395.266	13.6317		70.6025	30.6006	37.8911	0.860424	0.001	0.477791		374.266	9.17177	1623.63	328905	4.23831	0.250661	41.4535	0.344805	5.47962	9.84453
B1721A M 95 12/21/2017 2:49:15 PM (Run: 1)			485.602	386.161	56.1722	0.79522	735.839		0.0358121	10.5341	9.72976	15.9454	1.12919	16.3689	0.0796834	3.69922	0.224185	12.5497	3.69922	0.102777	15.9454	-4.78133e-16		711.181	73.6139	1674.87	294.677	767.367	88.1457	494.233	17.5995		70.4912	35.5937	37.7177	0.866829	0.001	0.475958
B1721A S 35 12/21/2017 12:22:47 PM (Run: 1)			1847.49	2055.95	182.199	1.11283	346.799		0.0287689	9.20328	10.631	17.4895	0.674428	18.9422	0.0520008	7.27493	0.38327	19.2305	7.27493	0.0940642	17.4895	0		573.273	52.0187	1509.4	330.259	523.401	77.4692	326.793	23.1815		78.3494	37.5635	37.9288	0.859062	0.001	0.478184
B1721A S 33 12/21/2017 12:19:19 PM (Run: 1)			3249.13	4587.55	341.168	1.41193	457.056		0.0261594	2.03598	10.8043	4.75289	0.504443	10.158	0.0395281	8.97744	0.882589	25.2985	8.97744	0.0925561	4.75289	-1.31232e-16		521.94	10.4906	1478.82	90.1184	414.705	34.5838	249.907	22.0059		83.1009	39.7386	37.9122	0.85966	0.001	0.478011		502.732	47.9794	6334.81	292556	13.3289	7.33315	93.9456	2.53099	21.309	33.243
B1721A S 66 12/21/2017 1:37:40 PM (Run: 1)			394.318	196.367	40.7259	0.497991	174.308		0.0532114	5.76247	8.65026	12.7623	1.12214	12.9298	0.0704007	2.0743	0.156358	14.2044	2.0743	0.115603	12.7623	0		1047.88	58.8451	1889.3	229.687	764.002	69.4218	438.569	8.79467		76.7867	42.5958	37.8362	0.862425	0.001	0.477216		195.898	17.4083	1072.61	330568	2.43377	108.267	247.073	28.3202	146.993	27.8471
B1721A S 73 12/21/2017 1:56:54 PM (Run: 1)			417.116	330.455	47.0385	0.792239	158.676		0.0434807	8.50869	8.48965	3.98055	1.1595	6.13687	0.0713934	4.6708	0.757294	14.0069	4.6708	0.11779	3.98055	0		860.268	71.6616	1922.98	71.351	781.718	33.4575	444.545	20.064		76.8826	43.1323	37.8218	0.862955	0.001	0.477064		254.244	24.5359	1131.53	317016	1.99867	2.68684	61.4148	2.18694	20.7498	17.8222
B1721A S 3 12/20/2017 6:41:01 PM (Run: 1)			164.24	90.7364	17.8386	0.552463	141.57		0.0551603	12.4584	7.43443	4.06328	1.35775	6.25388	0.0732095	4.75403	0.620748	13.6594	4.75403	0.134509	4.06328	-1.73027e-16		1085.24	131.638	2157.66	70.9022	870.904	36.5681	455.463	20.9056		78.8908	47.7023	37.8357	0.862445	0.001	0.47721
B1721A S 9 12/21/2017 10:42:20 AM (Run: 1)			1164.66	250.445	137.006	0.215037	195.574		0.121297	8.25107	7.17304	5.96261	1.47946	6.96877	0.0769673	3.60708	0.51329	12.9925	3.60708	0.139411	5.96261	-1.72446e-16		2314.02	180.407	2219.91	103.336	922.011	42.2214	477.995	16.618		78.4678	48.1573	37.7029	0.867385	0.001	0.475799
B1721A S 14 12/21/2017 10:58:05 AM (Run: 1)			541.046	516.551	78.264	0.954727	167.845		0.0574357	19.0552	7.15534	9.77665	1.47544	10.5743	0.0765686	4.0291	0.378478	13.0602	4.0291	0.139756	9.77665	-1.85648e-16		1128.78	209.196	2224.18	169.358	920.362	63.9959	475.609	18.4729		78.6165	48.3238	37.7208	0.866714	0.001	0.47599		222.38	23.5059	1196.74	307910	4.57808	4.62069	97.8521	2.37951	20.1623	12.4023
B1721A S 41 12/21/2017 12:40:15 PM (Run: 1)			498.197	87.4461	45.3063	0.175525	154.948		0.113318	19.5743	7.67131	11.0986	1.14855	12.7329	0.0639025	6.24076	0.488757	15.6488	6.24076	0.130356	11.0986	2.01812e-16		2169.66	402.696	2102.75	194.856	776.558	69.1133	399.315	24.1642		81.0099	48.5788	37.9057	0.859894	0.001	0.477944		166.203	32.9455	948.089	330169	2.33037	13.3538	139.07	11.7029	99.2569	33.657
B1721A S 22 12/21/2017 11:53:13 AM (Run: 1)			466.997	95.9228	46.8867	0.205403	119.758		0.117421	18.793	7.22523	17.5395	1.28651	17.9697	0.0674163	3.90877	0.215972	14.8332	3.90877	0.138404	17.5395	8.24106e-16		2244.02	399.151	2207.33	304.389	839.75	102.663	420.571	15.9144		80.9466	49.9172	37.8574	0.861651	0.001	0.477438		240.415	3.71718	788.581	334949	1.18936		6.88532	0.017489	0.522461	1.22023
B1721A S 56 12/21/2017 1:13:18 PM (Run: 1)			2780.32	3417.79	341.741	1.22928	218.21		0.039178	8.12597	7.85715	7.01608	0.852408	9.45015	0.0485748	6.33087	0.6681	20.5868	6.33087	0.127273	7.01608	0		776.753	61.9213	2060.63	123.768	625.97	44.1549	305.766	18.9057		85.1616	51.1533	37.8654	0.861356	0.001	0.477523		496.82	17.5091	6334.75	329802	17.0014	0.758559	220.666	0.833154	22.1593	38.5229
B1721A S 29 12/21/2017 12:05:17 PM (Run: 1)			378.926	319.692	70.9262	0.84368	84.4411		0.0770905	11.5564	5.273	10.6502	2.69342	11.2743	0.103005	3.69884	0.325471	9.70823	3.69884	0.189645	10.6502	-1.79777e-16		1501.02	167.18	2739.09	175.207	1326.65	83.4821	631.998	22.2673		76.9268	52.3614	37.4481	0.877244	0.001	0.473009
B1721A S 8 12/21/2017 10:40:37 AM (Run: 1)			546.967	228.146	80.3751	0.417111	140.203		0.110824	7.2003	5.68534	3.60671	1.98244	6.92615	0.0817438	5.91297	0.851068	12.2333	5.91297	0.175891	3.60671	-1.74558e-16		2124.34	145.195	2614.51	60.0346	1109.55	46.7466	506.523	28.8041		80.6265	54.3488	37.642	0.8697	0.001	0.475142
B1721A S 71 12/21/2017 1:53:26 PM (Run: 1)			351.001	106.065	44.4583	0.302177	84.2639		0.125325	5.42626	4.75007	5.84962	2.1779	6.4728	0.0750302	2.77113	0.422031	13.328	2.77113	0.210523	5.84962	-2.14258e-16		2386.49	122.144	2909.57	94.7677	1174.01	45.0422	466.39	12.4678		83.9705	60.2736	37.7838	0.86436	0.001	0.476662		161.71	54.228	574.233	320584	0.989706	10.3008	83.2458	5.4193	35.5537	11.9585
Dec 21st, 2017 Experiment 1a
Isotope ratio and apparent age errors include systematic calibration errors of 2.88% (207Pb/206Pb) and 19.44% (206Pb/238U) (all 2-sigma).
Trace element concentrations were deleted from analyses known to have intersected inclusions of other minerals based on P and Ti.
Ablation used a laser spot size of 25 microns, and a laser firing repetition rate of 10 Hz.
Activity of TiO2 for Ti-in-Zircon temperature calculation is 0.8.
Dec 21st, 2017 Experiment 1b
Isotope ratio and apparent age errors include systematic calibration errors of 0.47% (207Pb/206Pb), 0.710895202151844% (206Pb/238U) (all 1-sigma).
Trace element concentrations were deleted from analyses known to have intersected inclusions of other minerals based on P and Ti.
Ablation used a laser spot size of 25 microns, and a laser firing repetition rate of 10 Hz.
Activity of TiO2 for Ti-in-Zircon temperature calculation is 0.8.
IGNEOUS SAMPLES
B1725 Granite, Dashwoods Pond (47.99138° N, 58.53042° W)
B1725 S 188 10/14/2017 12:28:01 AM (Run: 1)			222.118	251.21	21.7667	1.13098	335.345		0.0228223	4.38023	18.8562	4.43769	0.514165	7.39116	0.0703161	5.91068	0.796312	14.2215	5.91068	0.053033	4.43769	1.32042e-16		456.102	19.7546	330.183	100.665	421.246	25.4842	438.06	25.0322		-32.6717	-3.99147	37.8394	0.862306	0.001	0.47725		282.34	16.3857	917.231	568565	1.13897	0.0726434	23.6373	0.191859	4.80356	6.99876
B1725 XL 137 10/13/2017 10:05:40 PM (Run: 1)			142.443	118.701	12.2119	0.833318	504.829		0.020325	6.67772	18.6065	6.35958	0.487312	7.57184	0.0657615	4.10957	0.538552	15.2065	4.10957	0.0537446	6.35958	0		406.693	26.8864	360.328	143.493	403.077	25.1905	410.569	16.3465		-13.9433	-1.8587	37.8774	0.860921	0.001	0.477648		254.243	21.0739	611.704	660078	1.02267		18.2536	0.0919019	2.09425	3.68447
B1725 M 142 10/13/2017 10:41:48 PM (Run: 1)			178.969	197.976	17.3732	1.1062	4775.76		0.0224596	4.14711	18.5994	5.24728	0.523667	6.24854	0.0706404	3.39269	0.536115	14.1562	3.39269	0.0537651	5.24728	1.9364e-16		448.935	18.4126	361.206	118.377	427.598	21.8059	440.013	14.4302		-21.8178	-2.90338	37.8395	0.862304	0.001	0.477251		235.035	16.5419	818.614	558473	0.948806		20.9543	0.229766	4.71521	7.66786
B1725 M 146 10/13/2017 10:48:36 PM (Run: 1)			453.584	645.346	51.0169	1.42277	809.741		0.024846	2.69185	18.5296	2.71823	0.541654	4.85988	0.0727926	4.02861	0.82153	13.7377	4.02861	0.0539677	2.71823	1.63068e-16		496.054	13.1905	369.688	61.2305	439.515	17.3377	452.958	17.6216		-22.5244	-3.05869	37.7858	0.864285	0.001	0.476683		235.641	19.1331	1431.79	546147	0.987727	0.0780014	34.4171	0.768812	9.2337	14.2639
B1725 S 207 10/14/2017 1:14:21 AM (Run: 1)			345.084	528.6	34.5222	1.5318	521.923		0.0215832	4.77513	18.4537	3.66251	0.48427	6.42714	0.0648141	5.28149	0.817381	15.4287	5.28149	0.0541897	3.66251	0		431.601	20.391	378.975	82.3647	400.998	21.2923	404.836	20.7239		-6.82396	-0.957169	37.8978	0.860181	0.001	0.477861		312.351	25.9347	1461.15	588869	1.74729	0.116142	32.4517	0.753696	12.5908	15.9843
B1725 M 147 10/13/2017 10:50:17 PM (Run: 1)			147.758	117.888	14.4793	0.797846	28530.5		0.0273918	6.60672	18.2954	4.9266	0.562661	6.66709	0.07466	4.49208	0.668914	13.3941	4.49208	0.0546585	4.9266	3.10459e-16		546.2	35.6027	398.301	110.417	453.257	24.3752	464.17	20.1179		-16.5375	-2.4076	37.7972	0.863864	0.001	0.476804
B1725 M 159 10/13/2017 11:24:39 PM (Run: 1)			169.993	188.514	17.5412	1.10895	973.623		0.025651	7.39565	18.2929	5.44801	0.551452	7.70425	0.0731628	5.44745	0.70358	13.6682	5.44745	0.0546659	5.44801	2.3191e-16		511.925	37.3847	398.623	122.096	445.947	27.8055	455.182	23.9407		-14.1886	-2.07086	37.8125	0.863296	0.001	0.476966		209.357	18.5333	695.197	560023	0.667406	0.0289337	19.2106	0.172301	4.00175	5.57163
B1725 M 148 10/13/2017 10:51:59 PM (Run: 1)			211.679	284.795	22.3826	1.34541	678.001		0.0240407	3.10008	18.2817	2.9928	0.538687	4.88505	0.0714251	3.86094	0.782647	14.0007	3.86094	0.0546996	2.9928	1.49776e-16		480.165	14.7101	399.925	67.0588	437.558	17.3654	444.736	16.5921		-11.2047	-1.6403	37.8274	0.862749	0.001	0.477123		222.062	31.2673	950.997	555607	0.833721	0.103832	29.6846	0.667596	10.1629	13.2871
B1725 S 210 10/14/2017 1:26:31 AM (Run: 1)			184.47	225.651	17.4933	1.22324	1367.84		0.0210595	5.68663	18.0648	5.41775	0.516611	6.68577	0.0676853	3.9176	0.580299	14.7743	3.9176	0.0553564	5.41775	1.6185e-16		421.238	23.7063	426.668	120.825	422.885	23.1244	422.195	16.0099		1.04832	0.163025	37.8755	0.860989	0.001	0.477629		285.063	30.1497	799.165	595540	1.02133		25.2223	0.365315	4.86032	9.15035
B1725 S 202 10/14/2017 1:05:52 AM (Run: 1)			264.169	209.426	22.4664	0.792772	6410.3		0.0227379	3.73094	17.9829	5.14782	0.499226	7.59696	0.0651111	5.58693	0.731924	15.3584	5.58693	0.0556085	5.14782	-2.409e-16		454.436	16.7655	436.774	114.604	411.178	25.6862	406.634	22.0166		6.90071	1.10519	37.8983	0.860161	0.001	0.477867		228.305	11.647	575.844	576509	1.62202		27.9832	0.0382889	1.00373	2.8481
B1725 M 164 10/13/2017 11:33:08 PM (Run: 1)			436.822	74.1999	36.1263	0.169863	4240.1		0.0278543	7.36654	17.9499	3.33419	0.564493	5.63003	0.0734885	4.53656	0.800035	13.6076	4.53656	0.0557105	3.33419	1.18027e-16		555.296	40.3493	440.854	74.1753	454.446	20.6265	457.139	20.0202		-3.69393	-0.592481	37.7779	0.864578	0.001	0.4766		626.592	3.917	1406.07	538243	2.58511	0.0376865	5.96653	0.102053	1.08088	3.29236
B1725 M 167 10/13/2017 11:38:13 PM (Run: 1)			220.97	292.685	22.9921	1.32455	3374.15		0.0235676	4.81153	17.9224	4.44676	0.545222	7.27563	0.0708708	5.75857	0.787981	14.1102	5.75857	0.0557962	4.44676	1.35048e-16		470.825	22.392	444.263	98.8685	441.862	26.0665	441.4	24.5676		0.644433	0.104499	37.8344	0.862492	0.001	0.477197		258.136	36.4986	1018.88	550178	0.945099	0.201313	29.0904	1.05809	11.8445	14.7754
B1725 M 154 10/13/2017 11:09:11 PM (Run: 1)			186.321	272.002	19.875	1.45986	1152.71		0.0234655	4.31676	17.8393	3.96987	0.546485	6.02203	0.0707056	4.52824	0.746591	14.1431	4.52824	0.0560561	3.96987	1.91663e-16		468.809	20.0045	454.61	88.1064	442.691	21.6075	440.405	19.2766		3.12455	0.516414	37.8392	0.862316	0.001	0.477247		320.122	41.8726	927.859	564093	0.836777	0.189759	28.0202	1.04464	12.8438	14.55
B1725 XL 132 10/13/2017 9:57:11 PM (Run: 1)			373.711	572.855	38.5742	1.53288	536.846		0.0209837	5.02815	17.7445	3.02583	0.52093	4.86369	0.0670412	3.80787	0.775876	14.9162	3.80787	0.0563555	3.02583	-3.09364e-16		419.737	20.8874	466.403	67.018	425.772	16.9148	418.305	15.4227		10.3125	1.75377	37.8544	0.861759	0.001	0.477407		295.785	29.3334	1791.63	652841	1.56721	0.134805	30.8535	0.936583	11.13	12.637
B1725 S 206 10/14/2017 1:12:40 AM (Run: 1)			213.911	189.383	17.8767	0.885338	287.561		0.0213438	7.3223	17.7162	5.92049	0.492	7.68763	0.0632171	4.90382	0.633952	15.8185	4.90382	0.0564455	5.92049	-1.185e-16		426.865	30.9286	469.968	131.049	406.273	25.7406	395.161	18.796		15.9175	2.73509	37.9248	0.859205	0.001	0.478142		429.591	19.8414	479.895	617735	1.63733	3.98077	36.1581	1.5714	8.63725	6.03863
B1725 M 161 10/13/2017 11:28:03 PM (Run: 1)			415.639	207.142	36.6521	0.49837	800.639		0.0247994	4.28385	17.6856	3.62212	0.559629	5.39122	0.0717827	3.99318	0.733872	13.9309	3.99318	0.0565431	3.62212	-1.22785e-16		495.135	20.9532	473.74	80.1245	451.285	19.6425	446.887	17.2405		5.66839	0.974675	37.8021	0.86368	0.001	0.476856		235.69	4.51036	518.184	548159	2.43626	0.0489698	12.4446	0.0194411	1.00587	0.551332
B1725 M 180 10/14/2017 12:14:20 AM (Run: 1)			345.969	373.839	33.5134	1.08056	1104.31		0.0232977	4.71703	17.6779	3.78935	0.535805	5.84374	0.0686967	4.44861	0.755581	14.5567	4.44861	0.0565679	3.78935	0		465.494	21.7066	474.761	83.8071	435.655	20.701	428.299	18.4342		9.78641	1.68854	37.8475	0.862011	0.001	0.477335		366.638	20.4802	1246.82	546448	1.23452	2.53273	24.2269	0.930946	7.26985	8.79114
B1725 M 144 10/13/2017 10:45:12 PM (Run: 1)			131.827	111.059	12.3415	0.842456	666.248		0.024506	7.67337	17.635	5.78811	0.559621	7.09657	0.0715762	4.10597	0.573603	13.9711	4.10597	0.0567054	5.78811	1.44228e-16		489.348	37.0985	480.118	127.895	451.28	25.8555	445.645	17.6799		7.18015	1.24865	37.8335	0.862523	0.001	0.477188		234.475	16.5454	506.183	561414	0.861422		16.9592	0.0791456	1.62538	2.89831
B1725 M 178 10/14/2017 12:03:53 AM (Run: 1)			263.98	152.295	21.4106	0.576918	442.401		0.0232671	5.34318	17.602	5.39364	0.512705	6.75543	0.0654527	4.0675	0.596742	15.2782	4.0675	0.0568118	5.39364	-3.16913e-16		464.89	24.5564	484.264	119.093	420.266	23.2486	408.701	16.1079		15.6037	2.75191	37.8919	0.860396	0.001	0.477799		331.578	17.9816	563.519	552789	2.02363	0.662319	18.7665	0.276426	3.1395	4.31296
B1725 M 166 10/13/2017 11:36:32 PM (Run: 1)			186.315	158.74	17.4307	0.852001	125.309		0.0239429	4.93537	17.5896	4.9484	0.55887	6.30767	0.0712962	3.91154	0.614172	14.026	3.91154	0.0568517	4.9484	1.78203e-16		478.236	23.3256	485.761	109.237	450.791	22.9615	443.96	16.7812		8.60525	1.51522	37.8316	0.862592	0.001	0.477168		216.993	16.4664	411.026	542610	0.896301		19.0266	0.0405993	1.33307	2.10279
B1725 M 153 10/13/2017 11:07:29 PM (Run: 1)			179.682	260.41	19.6849	1.44928	499.63		0.0246371	6.61183	17.5071	4.04532	0.567332	6.49405	0.0720359	5.08016	0.777855	13.882	5.08016	0.0571198	4.04532	0		491.933	32.1331	496.173	89.1402	456.287	23.8683	448.41	22.0057		9.62636	1.72647	37.8243	0.862864	0.001	0.47709		320.888	39.8765	906.355	553767	0.923161	0.152293	26.2537	1.10844	13.1545	14.7631
B1725 XL 133 10/13/2017 9:58:53 PM (Run: 1)			303.648	361.936	28.5487	1.19196	1349.57		0.0203954	3.27696	17.4718	2.87498	0.520386	5.20677	0.0659418	4.34108	0.827967	15.1649	4.34108	0.0572352	2.87498	1.42315e-16		408.087	13.2388	500.605	63.3036	425.409	18.0955	411.66	17.3118		17.7675	3.23205	37.8698	0.861195	0.001	0.477569		345.5	21.4673	892.785	635711	1.41554	0.0206053	31.8033	0.134469	3.42713	5.32009
B1725 S 236 10/14/2017 2:24:48 AM (Run: 1)			1695.93	1620.23	150.567	0.955364	5746.95		0.0221881	4.05819	17.4361	1.78418	0.437145	6.35429	0.0552807	6.09866	0.955956	18.0895	6.09866	0.0573523	1.78418	-1.88758e-16		443.566	17.8047	505.128	39.2546	368.237	19.6255	346.861	20.5948		31.332	5.80502	37.8933	0.860342	0.001	0.477815		399.177	13.7391	1485.2	582467	6.61115	0.112029	67.6284	0.464972	6.33338	10.5709
B1725 M 175 10/13/2017 11:58:47 PM (Run: 1)			283.063	285.03	25.7762	1.00695	3264.25		0.0232821	4.73847	17.4262	5.36578	0.517471	6.99167	0.0654013	4.48238	0.636402	15.2902	4.48238	0.057385	5.36578	2.88861e-16		465.186	21.791	506.361	118.031	423.46	24.209	408.39	17.7378		19.348	3.5588	37.893	0.860355	0.001	0.477811		289.788	32.9285	579.232	585164	2.01971		29.8248	0.184042	3.31374	5.68129
B1725 S 223 10/14/2017 1:55:39 AM (Run: 1)			217.953	225.961	20.5024	1.03674	2125.39		0.022842	4.76266	17.3659	3.76447	0.544208	5.28739	0.0685425	3.71285	0.694661	14.5895	3.71285	0.0575842	3.76447	0		456.492	21.4974	514.002	82.6982	441.195	18.9204	427.369	15.353		16.8546	3.13382	37.8626	0.861458	0.001	0.477494		1371.43	17.3119	748.039	572711	1.17791	21.929	69.7042	6.42927	28.4051	9.04718
B1725 S 231 10/14/2017 2:16:19 AM (Run: 1)			325.098	276.108	27.2231	0.849308	773.158		0.0222851	7.26322	17.364	4.72006	0.496852	6.37379	0.0625712	4.28325	0.66659	15.9818	4.28325	0.0575906	4.72006	-1.72106e-16		445.485	32.0026	514.23	103.687	409.569	21.4821	391.243	16.2595		23.9167	4.47441	37.9241	0.859232	0.001	0.478135		380.395	18.938	1057.83	621081	1.67453	0.0337268	28.4648	0.33722	5.88857	9.2497
B1725 M 170 10/13/2017 11:50:19 PM (Run: 1)			3244.12	1161.94	239.94	0.358169	0		0.0242663	3.20021	17.3174	1.87765	0.325637	3.44152	0.0408992	2.88418	0.823227	24.4504	2.88418	0.0577454	1.87765	0		484.618	15.3244	520.116	41.2057	286.229	8.58399	258.404	7.30544		50.318	9.7213	37.9191	0.85941	0.001	0.478083		310.661	7.28652	2102.56	581636	28.8621	6.24364	83.2733	3.45907	15.7597	12.5874
B1725 S 228 10/14/2017 2:04:08 AM (Run: 1)			432.426	614.356	43.66	1.42072	1214.58		0.0229413	2.7059	17.2746	2.92576	0.519082	4.56577	0.0650342	3.50517	0.758451	15.3765	3.50517	0.0578885	2.92576	0		458.453	12.2657	525.548	64.1474	424.538	15.8416	406.169	13.7977		22.7152	4.32678	37.885	0.860643	0.001	0.477728		401.248	22.0295	1650.21	548608	1.87637	0.731839	38.8189	0.760042	11.1118	14.363
B1725 M 182 10/14/2017 12:17:43 AM (Run: 1)			456.073	351.994	36.4139	0.771792	479.935		0.0167867	8.50838	17.2539	5.69803	0.504661	6.72133	0.0631517	3.56492	0.524225	15.8349	3.56492	0.057958	5.69803	-1.75094e-16		336.478	28.3919	528.201	124.872	414.853	22.89	394.764	13.6508		25.2625	4.8423	37.9015	0.860048	0.001	0.477899		407.825	20.8239	1004.94	574080	11.1784	1.71944	30.8861	0.773796	7.26696	6.08829
B1725 S 222 10/14/2017 1:53:58 AM (Run: 1)			153.035	119.085	13.7083	0.778156	535.322		0.0237994	3.89567	17.2207	4.74829	0.557425	7.65531	0.0696204	6.0048	0.781173	14.3636	6.0048	0.0580696	4.74829	-1.20193e-16		475.402	18.304	532.381	103.986	449.849	27.821	433.868	25.1955		18.5043	3.55251	37.8556	0.861714	0.001	0.47742		175.687	15.4146	377.226	594625	1.11487		18.8373	0.0459471	1.00577	1.75269
B1725 S 232 10/14/2017 2:18:00 AM (Run: 1)			286.005	310.868	27.5823	1.08693	345.413		0.0236554	5.00729	17.1661	2.82862	0.549495	5.76608	0.0684124	5.0246	0.8663	14.6172	5.0246	0.0582543	2.82862	0		472.559	23.3879	539.365	61.8713	444.666	20.7627	426.584	20.7403		20.91	4.06647	37.8594	0.861577	0.001	0.477459		325.218	21.3312	934.79	581086	1.74132	0.265161	29.4485	0.276939	3.6821	6.9346
B1725 XL 134 10/13/2017 10:00:35 PM (Run: 1)			248.486	292.322	22.7471	1.17641	1978.22		0.0188856	7.07143	17.1131	7.36321	0.528476	7.65933	0.0655922	2.10914	0.267295	15.2457	2.10914	0.0584349	7.36321	-4.5687e-16		378.159	26.4927	546.139	160.872	430.798	26.8898	409.545	8.36921		25.0109	4.93341	37.8749	0.86101	0.001	0.477622		207.659	35.2274	544.693	643944	4.61846	0.394032	31.061	0.306741	3.55267	4.26225
B1725 S 194 10/14/2017 12:45:14 AM (Run: 1)			169.396	170.494	16.2885	1.00648	320.298		0.0239583	7.75623	17.0402	6.05334	0.570038	7.62677	0.0704495	4.63947	0.60413	14.1946	4.63947	0.0586847	6.05334	1.22191e-16		478.54	36.6807	555.439	132.046	458.039	28.1167	438.863	19.6833		20.9881	4.1866	37.8453	0.862093	0.001	0.477311		600.903	15.8842	586.529	582947	1.16032	7.92362	32.6322	1.7989	11.2864	5.89205
B1725 M 152 10/13/2017 11:05:47 PM (Run: 1)			184.262	201.317	18.098	1.09256	574.63		0.0240671	5.26246	16.9905	4.13908	0.568155	5.99536	0.070012	4.33733	0.717836	14.2833	4.33733	0.0588563	4.13908	1.91999e-16		480.687	24.9975	561.772	90.1937	456.821	22.0558	436.228	18.2947		22.3478	4.50781	37.8467	0.862041	0.001	0.477326		266.141	34.9182	606.625	548100	0.603988	0.0647486	20.9795	0.397821	5.72185	5.40845
B1725 M 162 10/13/2017 11:29:45 PM (Run: 1)		z2	272.938	347.936	29.7442	1.27478	585.294		0.0250974	4.16291	16.988	4.66045	0.60092	6.86963	0.0740387	5.04699	0.730451	13.5065	5.04699	0.058865	4.66045	1.48321e-16		501.011	20.6003	562.134	101.547	477.818	26.1825	460.442	22.4279		18.0904	3.63651	37.7912	0.864083	0.001	0.476741		257.341	31.6654	933.453	539217	1.79718	0.24739	24.3453	0.751764	9.43509	9.60033
B1725 S 233 10/14/2017 2:19:43 AM (Run: 1)			7458.62	1480.21	617.249	0.198456	4764.7		0.0266045	6.77487	16.9381	1.70959	0.402385	13.1742	0.0494318	13.0628	0.990685	20.2299	13.0628	0.0590384	1.70959	9.4177e-16		530.706	35.4867	568.536	37.21	343.376	38.3821	311.032	39.6649		45.2924	9.41952	37.786	0.864277	0.001	0.476686
B1725 XL 135 10/13/2017 10:02:17 PM (Run: 1)			197.05	312.177	20.4679	1.58425	453.651		0.0185256	9.60213	16.9324	4.84102	0.575312	6.28515	0.0706515	4.00845	0.632589	14.154	4.00845	0.0590583	4.84102	-3.64687e-16		371.016	35.3004	569.22	105.358	461.444	23.3068	440.079	17.0517		22.6872	4.63004	37.8183	0.863082	0.001	0.477028		264.664	33.3619	617.6	643693	4.49556	0.177329	28.9871	0.305836	3.76775	5.25791
B1725 S 199 10/14/2017 1:00:47 AM (Run: 1)			178.311	156.791	16.9796	0.879308	557.205		0.0259755	3.52819	16.8903	5.07936	0.576862	6.66467	0.0706658	4.31485	0.642269	14.1511	4.31485	0.0592054	5.07936	0		518.318	18.0548	574.651	110.442	462.443	24.7564	440.166	18.3586		23.4029	4.81731	37.8419	0.862216	0.001	0.477276		278.711	7.41266	1017.81	581436	2.12771	0.0529809	26.0685	0.19956	3.02423	6.92516
B1725 S 189 10/14/2017 12:36:45 AM (Run: 1)			752.336	1289.55	82.3837	1.71406	3175.79		0.022767	5.07407	16.884	3.42936	0.524668	6.48832	0.0642479	5.50797	0.844765	15.5647	5.50797	0.0592276	3.42936	0		455.011	22.8296	575.472	74.5553	428.265	22.671	401.408	21.4351		30.2472	6.27112	37.8628	0.861452	0.001	0.477496		413.158	24.5853	2762.75	570465	6.03522	0.43607	41.1742	1.01308	12.0066	14.5945
B1725 S 191 10/14/2017 12:40:08 AM (Run: 1)		z1	260.383	290.779	26.1502	1.11674	534.335		0.0238813	4.36667	16.8638	3.62985	0.582965	6.09546	0.0713012	4.89681	0.798395	14.025	4.89681	0.0592986	3.62985	0		477.019	20.586	578.087	78.8789	466.365	22.7933	443.99	21.0095		23.1967	4.79773	37.8269	0.862768	0.001	0.477118		264.155	17.591	1193.49	588061	4.91335	1.74214	34.7647	1.02884	7.62478	10.9272
B1725 M 151 10/13/2017 11:04:05 PM (Run: 1)			112.128	113.546	10.7724	1.01265	317.025		0.0236813	5.50567	16.8536	7.46257	0.578863	8.75184	0.0707567	4.57218	0.51878	14.1329	4.57218	0.0593344	7.46257	-2.00292e-16		473.07	25.7432	579.416	162.129	463.73	32.5807	440.713	19.4768		23.9384	4.96355	37.8452	0.862096	0.001	0.477311		263.587	28.6702	492.829	560845	0.977118	0.0107485	15.1452	0.120113	1.67115	3.27178
B1725 S 205 10/14/2017 1:10:58 AM (Run: 1)			625.184	1029.46	65.1552	1.64665	1852.43		0.0217941	3.65951	16.7674	2.26855	0.524528	5.14289	0.0637871	4.61552	0.891211	15.6771	4.61552	0.0596396	2.26855	0		435.774	15.7765	590.554	49.1932	428.172	17.9668	398.616	17.8409		32.5013	6.90278	37.8867	0.860581	0.001	0.477746		451.267	30.9802	2380.95	582137	7.86733	0.457412	44.5606	1.30005	11.4589	16.7039
B1725 M 145 10/13/2017 10:46:54 PM (Run: 1)			361.22	665.065	42.896	1.84116	488.279		0.0241269	5.90362	16.7595	3.30623	0.581656	6.51864	0.0707011	5.61797	0.857865	14.1441	5.61797	0.0596677	3.30623	-1.89769e-16		481.866	28.1111	591.534	71.6847	465.525	24.3412	440.378	23.9142		25.5532	5.40189	37.8209	0.862988	0.001	0.477055		154.19	7.76347	804.11	558710	1.14468	0.326793	47.5247	1.10837	16.1499	16.8227
B1725 M 187 10/14/2017 12:26:12 AM (Run: 1)			275.077	212.223	23.9775	0.771505	663.152		0.0239911	8.41946	16.7299	7.59314	0.544176	8.35824	0.0660285	3.49347	0.412905	15.145	3.49347	0.0597732	7.59314	2.62816e-16		479.186	39.8704	595.382	164.525	441.174	29.908	412.184	13.9489		30.7698	6.57111	37.8832	0.860708	0.001	0.477709		241.017	15.9487	675.169	563283	2.00816	0.164142	24.7851	0.177722	2.94248	5.66807
B1725 S 217 10/14/2017 1:38:23 AM (Run: 1)			201.282	217.713	19.2643	1.08163	11647		0.0233949	4.82059	16.6903	4.26199	0.564979	6.10246	0.0683905	4.36754	0.710139	14.6219	4.36754	0.059915	4.26199	-1.85368e-16		467.415	22.2736	600.476	92.2696	454.762	22.3696	426.451	18.0227		28.9811	6.22536	37.8642	0.861403	0.001	0.47751		1583.85	16.3258	828.955	590581	1.14513	26.0318	68.9397	6.88756	29.666	10.0756
B1725 S 200 10/14/2017 1:02:29 AM (Run: 1)			365.561	68.425	27.9236	0.187178	6950.3		0.0189562	8.13776	16.6697	2.77318	0.575704	5.90316	0.0696028	5.21122	0.877967	14.3672	5.21122	0.0599889	2.77318	0		379.558	30.5993	603.151	60.0106	461.697	21.8998	433.762	21.8606		28.084	6.05041	37.8375	0.862377	0.001	0.47723		302.78	4.03006	511.52	585620	1.99426	0.119925	6.45935	0.127539	0.885015	0.643908
B1725 M 149 10/13/2017 11:00:42 PM (Run: 1)			147.73	149.112	13.2976	1.00935	0		0.022932	5.6185	16.488	6.65006	0.546198	7.44821	0.0653155	3.35448	0.44454	15.3103	3.35448	0.0606502	6.65006	0		458.271	25.4582	626.87	143.333	442.503	26.7157	407.871	13.2581		34.9353	7.82631	37.9035	0.859973	0.001	0.477921		237.025	18.9473	646.759	585584	0.8916		17.9915	0.0923204	2.92329	5.59497
B1725 M 163 10/13/2017 11:31:27 PM (Run: 1)			154.387	153.497	15.7147	0.994233	427.046		0.0261436	6.42727	16.1274	7.82866	0.630894	8.62909	0.0737936	3.62951	0.415929	13.5513	3.62951	0.0620064	7.82866	2.41852e-16		521.629	33.0976	674.35	167.413	496.652	33.8942	458.97	16.0792		31.9389	7.5872	37.8067	0.863511	0.001	0.476905
B1725 S 219 10/14/2017 1:48:53 AM (Run: 1)			7320.75	1597.3	721.404	0.218188	8723.15		0.0337041	6.24736	16.061	4.05766	0.638835	5.23763	0.0744148	3.31182	0.623769	13.4382	3.31182	0.0622628	4.05766	1.52488e-16		670.004	41.1714	683.115	86.6489	501.585	20.7309	462.699	14.7867		32.2663	7.75266	37.6398	0.869782	0.001	0.475118
B1725 M 176 10/14/2017 12:00:29 AM (Run: 1)			225.793	71.0125	21.3347	0.314502	611.496		0.0316593	7.50004	15.3076	5.5984	0.732306	7.57043	0.0813016	5.09601	0.669326	12.2999	5.09601	0.0653269	5.5984	0		629.981	46.5201	784.897	117.586	557.906	32.4951	503.887	24.7002		35.8022	9.68239	37.7145	0.866949	0.001	0.475923		423.81	10.8913	674.873	559560	2.74643	1.7486	19.855	0.813637	4.96531	3.07136
Inherited Cores
B1725 M 156 10/13/2017 11:12:34 PM (Run: 1)			106.468	42.5255	19.0865	0.399419	700.157		0.0548164	6.07424	14.2383	4.71111	1.46025	5.78493	0.150795	3.35722	0.572813	6.63153	3.35722	0.070233	4.71111	0		1078.66	63.8026	935.194	96.6313	914.114	34.864	905.417	28.3587		3.18404	0.951402	36.9532	0.897618	0.001	0.467287		355.456	23.4605	1123.2	569311	5.09919	0.0562144	18.5128	0.289695	5.07137	8.85895
B1725 M 169 10/13/2017 11:48:37 PM (Run: 1)			153.743	67.7502	31.0666	0.440671	971.216		0.0555826	5.27035	13.6536	2.56512	1.68966	4.57948	0.167318	3.79365	0.819933	5.97665	3.79365	0.073241	2.56512	0		1093.33	56.0917	1020.64	51.9298	1004.63	29.2111	997.317	35.0533		2.28562	0.728279	36.7524	0.90628	0.001	0.464849		299.321	21.5335	967.113	549175	9.25327		25.7296	0.0454988	2.86921	5.93883
B1725 S 213 10/14/2017 1:31:36 AM (Run: 1)			152.105	97.6137	30.8417	0.64175	1164.06		0.0539657	4.22842	13.3692	2.96261	1.63728	5.19747	0.158755	4.27044	0.814958	6.29902	4.27044	0.0747986	2.96261	1.3835e-16		1062.35	43.7605	1063.08	59.5949	984.664	32.7634	949.854	37.7161		10.6509	3.53523	36.8505	0.902022	0.001	0.466049		183.085	4.94738	563.676	590127	3.06484		35.9545	0.106611	2.11815	3.02406
B1725 M 155 10/13/2017 11:10:52 PM (Run: 1)			40.3548	24.4741	9.01154	0.606472	287.015		0.0569836	9.01196	13.319	5.2355	1.89151	7.02415	0.182717	4.68276	0.662224	5.47296	4.68276	0.0750807	5.2355	0		1120.14	98.2004	1070.67	105.195	1078.11	46.656	1081.8	46.6356		-1.03943	-0.342033	36.6432	0.911073	0.001	0.463495		213.595	19.0068	609.202	555184	0.93433	0.0445053	5.50802	0.255775	3.98404	5.15696
B1725 M 158 10/13/2017 11:15:58 PM (Run: 1)			125.574	62.0676	34.4616	0.494272	62864.5		0.0781346	4.49582	11.4163	2.37402	2.63226	4.63123	0.217949	3.97647	0.850679	4.58823	3.97647	0.0875938	2.37402	0		1520.61	65.8554	1373.59	45.664	1309.7	34.0783	1271.03	45.8714		7.46692	2.95259	36.2054	0.930775	0.001	0.457857		284.139	3.5699	2025.38	553283	2.8304	0.0303085	10.3034	0.389943	6.66455	15.0664
B1725 S 195 10/14/2017 12:46:56 AM (Run: 1)			63.2831	62.502	20.7682	0.987656	679.729		0.0744052	4.05501	10.7614	3.76064	3.07989	5.3633	0.240382	3.82396	0.705765	4.16005	3.82396	0.092925	3.76064	4.79004e-16		1450.57	56.7596	1486.36	71.2323	1427.7	41.1102	1388.68	47.7724		6.57157	2.73298	36.0365	0.93854	0.001	0.455593		451.324	6.6713	1476.39	589806	1.8643		36.4233	0.257541	4.51906	9.09497
DISCORDANT ANALYSES
B1725 M 150 10/13/2017 11:02:24 PM (Run: 1)			451.992	696.771	52.745	1.54155	1494.98		0.0254269	6.53757	15.4967	5.40535	0.646502	6.68972	0.0726619	3.94138	0.583641	13.7624	3.94138	0.06453	5.40535	0		507.508	32.7656	759.043	114.006	506.324	26.6714	452.173	17.2112		40.4285	10.6949	37.7901	0.864124	0.001	0.47673		393.528	33.3473	1753.6	553333	3.25292	0.456817	31.8034	0.829063	10.4557	11.7236
B1725 S 211 10/14/2017 1:28:13 AM (Run: 1)			350.544	291.567	28.0075	0.831756	1219.35		0.0222086	6.85606	16.1377	5.7103	0.503305	7.25867	0.0589076	4.48116	0.612795	16.9757	4.48116	0.0619668	5.7103	-1.36325e-16		443.971	30.107	672.99	122.14	413.937	24.6758	368.978	16.0702		45.1733	10.8613	37.9643	0.857791	0.001	0.478551		312.585	15.4552	883.269	621034	1.27124	1.1518	28.2164	0.524695	3.91848	5.8959
B1725 M 177 10/14/2017 12:02:11 AM (Run: 1)			772.831	156.898	109.824	0.203017	13409		0.0452133	5.95005	13.5791	1.63606	1.11822	5.1685	0.110128	4.90272	0.94276	9.08035	4.90272	0.0736425	1.63606	-4.97945e-16		893.8	52.0229	1031.67	33.0666	762.123	27.7045	673.491	31.3531		34.7181	11.6296	37.2104	0.886843	0.001	0.470311		123.979	7.46936	749.408	566262	9.48379	0.313702	51.9366	0.272337	1.41992	2.07097
B1725 S 240 10/14/2017 2:35:14 AM (Run: 1)			6627.07	1627.92	539.237	0.245648	3948.77		0.0269247	7.45982	15.5815	6.56007	0.577249	8.97977	0.0652334	6.13203	0.680189	15.3296	6.13203	0.0641788	6.56007	0		537.008	39.5323	747.502	138.621	462.692	33.3701	407.374	24.2074		45.5019	11.9555	37.8197	0.86303	0.001	0.477043		4644.27	12.2416	16974.5	502536	35.1738	2.98031	44.5576	1.375	13.0087	13.6371
B1725 S 193 10/14/2017 12:43:32 AM (Run: 1)			6312.42	1418.08	493.516	0.224649	4337.48		0.0273287	5.97091	16.9588	1.3903	0.299665	16.8613	0.0368579	16.8038	0.996072	27.1312	16.8038	0.0589663	1.3903	5.61369e-16		544.958	32.1042	565.875	30.2741	266.139	39.4752	233.327	38.5069		58.767	12.3286	37.8455	0.862086	0.001	0.477313		3754.63	7.65373	11376.1	546133	30.3099	4.68211	35.0242	1.19228	6.9399	14.768
B1725 M 174 10/13/2017 11:57:05 PM (Run: 1)			534.898	657.276	55.0426	1.22879	1057.75		0.0249685	2.95434	15.3296	2.9116	0.605791	5.39153	0.0673524	4.53775	0.835623	14.8473	4.53775	0.0652332	2.9116	4.06024e-16		498.469	14.5464	781.867	61.1841	480.902	20.6526	420.185	18.4588		46.2588	12.6258	37.8482	0.861987	0.001	0.477342		272.283	32.194	1255.63	563921	2.13544	0.254557	36.391	1.16607	13.3658	13.3609
B1725 S 238 10/14/2017 2:28:11 AM (Run: 1)			599.583	766.273	58.6036	1.27801	768.115		0.0229993	3.13311	15.4448	4.93575	0.566515	6.37419	0.0634589	4.03344	0.627028	15.7582	4.03344	0.0647467	4.93575	3.61029e-16		459.601	14.2373	766.109	103.983	455.758	23.4062	396.627	15.5155		48.2284	12.9743	37.8902	0.860457	0.001	0.477781		667.89	36.5161	1513.87	575935	5.28862	13.7315	75.3846	4.1355	24.7702	16.4257
B1725 M 171 10/13/2017 11:52:00 PM (Run: 1)			2736.23	872.151	197.525	0.318742	2113.66		0.0239603	7.13746	16.3497	3.61556	0.385031	8.20365	0.0456567	7.36394	0.895205	21.9026	7.36394	0.0611633	3.61556	-1.77785e-16		478.579	33.7572	644.997	77.6939	330.733	23.1565	287.801	20.7273		55.3795	12.9811	37.9294	0.859042	0.001	0.47819		1758.93	6.07126	4883.65	585384	14.4843	2.27421	66.4415	1.76561	10.3393	10.7455
B1725 M 165 10/13/2017 11:34:50 PM (Run: 1)			6084.39	6255.65	534.989	1.02815	16783		0.0225915	5.84519	17.9121	1.2223	0.110492	13.2285	0.0143542	13.1719	0.99488	69.6662	13.1719	0.0558282	1.2223	2.35511e-16		451.541	26.1008	445.533	27.1703	106.416	13.3647	91.875	12.0159		79.3786	13.6641	37.9241	0.859231	0.001	0.478135		837.287	9.27022	4410.31	507823	54.2466	8.50611	161.755	3.71656	20.9428	23.436
B1725 XL 138 10/13/2017 10:07:22 PM (Run: 1)			498.262	844.894	44.8073	1.69568	1901.45		0.012143	3.64048	15.2111	3.65987	0.585092	5.04214	0.064548	3.46823	0.68039	15.4923	3.46823	0.0657416	3.65987	-1.41054e-16		243.957	8.82784	798.146	76.7079	467.729	18.898	403.225	13.5564		49.4798	13.7907	37.88	0.860825	0.001	0.477676		253.786	51.4207	884.433	638389	28.4397	2.82732	74.6607	2.24932	13.9772	11.9101
B1725 M 139 10/13/2017 10:36:43 PM (Run: 1)			238.93	145.699	20.5592	0.609799	2078.25		0.0258891	9.20318	15.0688	5.11188	0.616822	6.20349	0.0674119	3.51452	0.559893	14.8342	3.51452	0.0663623	5.11188	0		516.615	46.9425	817.852	106.802	487.853	24.0305	420.545	14.3083		48.5794	13.7969	37.8704	0.861175	0.001	0.477575		215.925	20.2821	508.423	562654	8.23893	0.713745	26.0593	0.54662	2.70936	3.46806
B1725 S 221 10/14/2017 1:52:16 AM (Run: 1)			189.102	196.045	17.4584	1.03672	1320.32		0.0228611	4.48072	15.0179	5.61738	0.610858	6.91796	0.0665347	4.03772	0.578352	15.0298	4.03772	0.0665872	5.61738	1.51464e-16		456.869	20.2414	824.881	117.235	484.101	26.6373	415.244	16.2378		49.6601	14.2236	37.8884	0.86052	0.001	0.477764		1158.62	13.4139	605.911	588895	0.994292	12.22	49.3009	4.13682	23.424	6.81885
B1725 S 234 10/14/2017 2:21:24 AM (Run: 1)			4913.54	2092.84	464.503	0.425932	0		0.0296648	13.3402	14.7989	8.04449	0.659233	8.77689	0.0707568	3.51	0.395112	14.1329	3.51	0.0675724	8.04449	0		590.868	77.6819	855.498	167.072	514.145	35.4081	440.713	14.9521		48.4846	14.2822	37.7449	0.86581	0.001	0.476248		3009.74	27.471	9524.32	461140	71.6016	285.911	550.917	50.1883	185.177	43.0307
B1725 S 212 10/14/2017 1:29:54 AM (Run: 1)			3811.25	2658.65	340.399	0.697581	4832.17		0.0234962	2.70965	16.8	2.21331	0.258154	7.89948	0.0314547	7.58307	0.957471	31.7918	7.58307	0.0595239	2.21331	2.31588e-16		469.415	12.5729	586.293	48.0308	233.178	16.4578	199.646	14.9073		65.9477	14.3803	37.8362	0.862425	0.001	0.477216		1994.15	13.1935	8363.56	539220	24.3614	7.45048	156.22	6.05873	43.1267	33.8358
B1725 S 218 10/14/2017 1:40:07 AM (Run: 1)			212.08	207.114	20.3399	0.976585	266.954		0.0259205	5.37761	14.7631	2.82177	0.636995	5.10784	0.0682043	4.25766	0.826737	14.6618	4.25766	0.0677365	2.82177	0		517.235	27.462	860.507	58.5583	500.444	20.1816	425.328	17.5246		50.5724	15.0099	37.8678	0.861272	0.001	0.477547		1145.38	18.4267	801.174	588069	1.62617	21.0248	62.3225	5.80277	28.474	9.10324
B1725 M 143 10/13/2017 10:43:30 PM (Run: 1)			8446.91	1330.35	608.61	0.157495	129853		0.0263102	2.55003	18.3048	1.02736	0.0179648	84.0327	0.00238498	84.0265	0.999905	419.29	84.0265	0.0546305	1.02736	-2.77774e-16		524.911	13.2131	397.156	23.0304	18.0792	15.058	15.3563	12.888		96.1334	15.0611	37.8878	0.860541	0.001	0.477757		2797.55	3.99918	8777.46	488262	93.394	0.643746	39.4096	0.387635	3.68302	8.70846
B1725 S 198 10/14/2017 12:52:01 AM (Run: 1)			11508.6	3657.18	688.992	0.317778	0		0.020597	3.03538	17.5418	2.1164	0.090474	22.3749	0.0115106	22.2746	0.995219	86.8767	22.2746	0.0570067	2.1164	3.30284e-16		412.081	12.3816	491.822	46.6702	87.9449	18.8495	73.7781	16.3401		84.999	16.1087	38.0512	0.854728	0.001	0.479441
B1725 M 172 10/13/2017 11:53:42 PM (Run: 1)			5870.23	5912.55	490.98	1.00721	110455		0.0220701	6.83545	17.1202	3.11379	0.149766	15.6149	0.0185961	15.3013	0.9793	53.7748	15.3013	0.0584105	3.11379	0		441.232	29.8334	545.182	68.0427	141.705	20.6525	118.777	18.008		78.2134	16.1803	37.9622	0.857866	0.001	0.47853
B1725 S 235 10/14/2017 2:23:06 AM (Run: 1)			8471.28	1691.49	494.777	0.199673	9625.13		0.0199456	11.6577	17.2568	2.33512	0.110844	24.4383	0.013873	24.3264	0.995176	72.0827	24.3264	0.0579483	2.33512	0		399.176	46.0782	527.818	51.1776	106.737	24.7604	88.8162	21.4577		83.173	16.7896	38.0395	0.855138	0.001	0.479322
B1725 M 181 10/14/2017 12:16:01 AM (Run: 1)			8399.1	1373.1	555.388	0.163482	111716		0.0244569	4.63429	18.1466	0.876299	-0.0181218	111.013	-0.00238504	-111.009	-0.999957	-419.28	-111.009	0.0551069	0.876299	0		488.379	22.3616	416.591	19.5773	-18.5694	-20.8041	-15.3933	17.1085		103.695	17.1038	37.9522	0.858225	0.001	0.478426		4550.01	7.4511	12351.7	547231	30.7168	15.3873	64.1213	7.28876	34.945	25.7828
B1725 S 224 10/14/2017 1:57:21 AM (Run: 1)			7753.9	1686.67	514.828	0.217525	54387.9		0.0256567	6.97961	17.185	1.78045	0.109002	20.7189	0.0135857	20.6423	0.995954	73.6068	20.6423	0.0581902	1.78045	2.0446e-16		512.036	35.2892	536.935	38.9607	105.052	20.6775	86.9895	17.836		83.7989	17.1936	37.9687	0.857636	0.001	0.478596		3754.39	5.98284	11902.6	537504	28.9083	31.3677	98.9636	7.74767	30.2201	18.8303
B1725 S 209 10/14/2017 1:24:49 AM (Run: 1)			8923.76	1866.12	517.342	0.209118	18976		0.0216798	4.52394	17.0628	1.61584	0.123301	14.0738	0.0152586	13.9808	0.992634	65.5366	13.9808	0.058607	1.61584	-2.60145e-16		433.513	19.4031	552.545	35.265	118.06	15.686	97.6206	13.5453		82.3325	17.3129	38.0508	0.854743	0.001	0.479437
B1725 S 201 10/14/2017 1:04:11 AM (Run: 1)			9579.82	1655.56	557.592	0.172817	15010.1		0.0213329	4.50852	17.3593	1.90686	0.0747327	29.6342	0.00940897	29.5728	0.997758	106.282	29.5728	0.0576059	1.90686	0		426.648	19.0339	514.812	41.8846	73.1806	20.9234	60.3706	17.7699		88.2733	17.5047	38.0382	0.855182	0.001	0.479309
B1725 S 216 10/14/2017 1:36:42 AM (Run: 1)			3726.46	863.097	273.695	0.231613	2034.41		0.0246968	2.40215	15.7631	2.33431	0.317631	10.859	0.0363131	10.6051	0.975334	27.5382	10.6051	0.0634392	2.33431	-2.51691e-16		493.11	11.7019	722.986	49.5227	280.079	26.5796	229.939	23.9556		68.1959	17.9018	37.896	0.860244	0.001	0.477843		1897.1	18.0813	6413.17	586772	53.6142	5.55638	64.4189	3.6318	21.6896	16.8835
B1725 M 173 10/13/2017 11:55:24 PM (Run: 1)			221.636	233.138	22.9658	1.05189	857.968		0.0273326	4.16365	13.8356	4.34343	0.714592	5.71777	0.0717058	3.71854	0.643421	13.9459	3.71854	0.0722774	4.34343	0		545.035	22.3901	993.786	88.2905	547.469	24.1966	446.424	16.0387		55.0784	18.4568	37.8247	0.862849	0.001	0.477094		293.472	26.7624	840.281	557959	8.80801	4.38916	29.0158	0.895935	6.48277	6.61426
B1725 S 230 10/14/2017 2:14:37 AM (Run: 1)			964.243	384.202	92.1027	0.398449	464.897		0.0293226	7.31081	13.5095	5.86821	0.797191	6.1593	0.078109	1.87112	0.290947	12.8026	1.87112	0.0740218	5.86821	0		584.15	42.0948	1042.06	118.416	595.243	27.7414	484.826	8.73893		53.4742	18.5499	37.7294	0.86639	0.001	0.476083		1300.05	21.7659	2998.22	543697	12.1558	1.94933	28.4042	0.818363	6.73785	12.1266
B1725 S 214 10/14/2017 1:33:18 AM (Run: 1)			10929	1825.7	672.258	0.167051	0		0.0228479	4.96532	17.858	1.42741	-0.0439772	55.4529	-0.00569587	-55.4345	-0.99962	-175.566	-55.4345	0.0559972	1.42741	0		456.609	22.4179	452.281	31.6922	-45.6654	-25.9008	-36.8229	20.471		108.142	19.3635	38.0019	0.856457	0.001	0.478938		4590.76	5.69263	14373.9	588851	54.0254	3.09543	29.5599	0.686366	5.37207	14.8341
B1725 M 183 10/14/2017 12:19:25 AM (Run: 1)			201.471	228.013	20.7168	1.13174	230.616		0.0256563	5.00557	13.6611	7.81876	0.714591	9.02204	0.0708017	4.50159	0.495316	14.124	4.50159	0.0732003	7.81876	0		512.028	25.308	1019.48	158.318	547.469	38.1796	440.984	19.1875		56.7442	19.4505	37.837	0.862396	0.001	0.477225		218.382	22.175	821.299	560597	2.22303	0.982807	27.3086	0.927839	6.59894	7.75188
B1725 S 203 10/14/2017 1:07:34 AM (Run: 1)			4574.6	1992.94	346.852	0.435655	2707.26		0.0240573	2.83435	15.5014	2.51852	0.308187	11.1156	0.0346484	10.8266	0.972762	28.8614	10.8266	0.0645104	2.51852	0		480.493	13.4583	758.411	53.1242	272.775	26.5894	219.576	23.3722		71.0479	19.503	37.9229	0.859273	0.001	0.478123		1094.55	68.3137	4251.16	594044	98.5598	4.87368	112.788	2.69225	15.4878	18.3644
B1725 M 179 10/14/2017 12:12:38 AM (Run: 1)			617.287	117.545	57.9022	0.190422	850.332		0.0384154	6.19086	13.2571	1.60323	0.811428	4.36906	0.0780187	4.06428	0.921927	12.8174	4.06428	0.075431	1.60323	-2.81006e-16		761.915	46.2912	1080.02	32.168	603.255	19.8722	484.286	18.9616		55.1594	19.7212	37.7021	0.867415	0.001	0.475791		398.337	16.1925	923.292	544306	8.28878	3.88104	20.1126	2.26862	10.5505	6.29217
B1725 S 197 10/14/2017 12:50:20 AM (Run: 1)			9063.73	1861.28	602.141	0.205355	5833.27		0.0249007	5.1555	17.1733	1.2504	0.0265952	114.178	0.00331249	114.171	0.999929	301.887	114.171	0.05823	1.2504	-1.30601e-15		497.132	25.317	538.45	27.3547	26.6515	30.0343	21.3184	24.2993		96.0408	20.0103	37.9631	0.857835	0.001	0.478539		2114.25	9.51298	8053.88	553012	82.5202	14.374	90.6952	8.75264	46.1103	29.4411
B1725 S 208 10/14/2017 1:16:03 AM (Run: 1)			11101.8	2643.17	742.419	0.238084	20340.1		0.0230568	2.94975	17.6664	1.09469	-0.0423694	50.3586	-0.00542873	-50.3467	-0.999705	-184.205	-50.3467	0.0566047	1.09469	0		460.736	13.4369	476.155	24.2053	-43.9591	-22.6234	-35.0912	17.7154		107.37	20.1732	37.9614	0.857897	0.001	0.478521		2767.5	16.4261	10773.7	557988	156.688	14.6692	91.0297	5.83043	31.5732	28.0116
B1725 M 168 10/13/2017 11:39:55 PM (Run: 1)			204.397	254.113	19.882	1.24323	1890.29		0.0197052	6.81503	13.2897	5.60803	0.723195	6.82049	0.069706	3.88189	0.563602	14.346	3.88189	0.0752462	5.60803	1.58453e-16		394.411	26.6186	1075.08	112.607	552.552	29.0648	434.384	16.3067		59.595	21.3858	37.8495	0.861937	0.001	0.477356
B1725 S 215 10/14/2017 1:35:00 AM (Run: 1)			10796.8	2415.56	751.965	0.223729	945159		0.0243938	3.7598	17.7243	1.09273	-0.0970482	24.1823	-0.0124754	-24.1576	-0.998725	-80.1576	-24.1576	0.0564197	1.09273	1.31097e-15		487.134	18.0963	468.931	24.1919	-103.656	-26.3907	-80.9276	19.6734		117.258	21.9271	37.9302	0.859013	0.001	0.478198		2455.17	4.47691	8683.86	536342	82.7066	0.87794	38.9574	0.257673	2.93126	9.86715
B1725 M 141 10/13/2017 10:40:07 PM (Run: 1)			178.572	158.678	20.6133	0.888594	209.334		0.0338282	6.26794	12.1537	11.4566	0.920545	11.8419	0.0811436	2.99651	0.248956	12.3238	2.99651	0.0822792	11.4566	-4.02426e-16		672.43	41.4541	1252.18	224.159	662.648	57.6333	502.945	14.4979		59.8345	24.1008	37.7198	0.866748	0.001	0.475981		364.147	14.4152	548.236	531819	1.43688	3.30539	25.9036	0.906487	4.57399	3.69252
B1725 S 226 10/14/2017 2:00:44 AM (Run: 1)			13952.7	2839.03	920.408	0.203476	24106.9		0.023163	3.29982	17.5577	0.899194	-0.14557	12.4557	-0.018537	-12.4232	-0.996434	-53.9461	-12.4232	0.0569551	0.899194	4.97137e-16		462.835	15.0992	489.809	19.8357	-159.741	-21.5474	-120.619	15.1258		124.626	24.4912	37.963	0.857837	0.001	0.478538		2243.72	9.50516	10239	564688	125.173	6.17314	149.493	2.09081	14.0854	20.9833
B1725 S 220 10/14/2017 1:50:34 AM (Run: 1)			18710.6	5744	1157.92	0.306992	0		0.021658	4.11841	17.7201	1.11808	-0.191591	9.97156	-0.0246229	-9.90868	-0.992194	-40.6126	-9.90868	0.0564332	1.11808	0		433.082	17.6464	469.464	24.7507	-215.959	-23.9959	-160.716	16.125		134.234	25.5802	38.0295	0.855486	0.001	0.479221		3288.54	6.30076	14435.9	618165	120.979	0.161633	62.1838	0.240633	4.57546	19.4904
B1725 S 225 10/14/2017 1:59:02 AM (Run: 1)			947.81	570.038	98.6984	0.601426	544.682		0.0291164	7.84002	11.6082	8.22652	0.955089	8.88026	0.0804096	3.34414	0.371593	12.4363	3.34414	0.086146	8.22652	-2.56165e-16		580.099	44.8334	1341.46	158.945	680.749	44.0487	498.567	16.0443		62.8339	26.762	37.7098	0.867125	0.001	0.475873		912.164	44.7221	2759.74	554309	17.4257	3.50327	51.9568	2.20599	10.2723	13.076
B1725 S 190 10/14/2017 12:38:27 AM (Run: 1)			11130.6	4017.36	910.19	0.36093	2227.3		0.028811	4.76188	15.3526	3.84158	-0.135451	13.4726	-0.0150822	-12.9133	-0.957635	-66.3035	-12.9133	0.0651354	3.84158	-1.59097e-16		574.102	26.9534	778.734	80.7665	-147.786	-21.4325	-97.9665	12.7473		112.58	33.7107	37.8573	0.861652	0.001	0.477438		2932.17	71.2464	9817.46	485679	96.4999	20.4787	124.608	11.1109	59.8402	32.2136
B1725 S 229 10/14/2017 2:12:55 AM (Run: 1)			1809.83	1784.57	182.261	0.98604	622.776		0.0303871	10.3462	11.0281	3.02379	0.702772	4.46412	0.0562101	3.28406	0.725561	17.7904	3.28406	0.0906774	3.02379	4.12829e-16		605.041	61.671	1439.84	57.6362	540.445	18.7079	352.536	11.2666		75.5156	34.7694	37.8823	0.860741	0.001	0.4777		713.142	50.2233	3634.38	594936	30.3443	4.92606	150.257	2.381	17.6535	20.2902
B1725 M 185 10/14/2017 12:22:48 AM (Run: 1)			553.166	580.982	48.2314	1.05029	0		0.0222431	8.55281	10.6986	5.08903	0.7467	5.8073	0.0579391	2.7976	0.472641	17.2595	2.7976	0.0934702	5.08903	0		444.654	37.6152	1497.42	96.2515	566.308	25.2076	363.08	9.87677		75.753	35.8865	37.9581	0.858013	0.001	0.478487		310.944	45.609	1455.08	614184	62.3517	12.3127	144.137	6.17167	30.5088	18.3112
B1725 S 227 10/14/2017 2:02:26 AM (Run: 1)			355.199	338.442	39.4134	0.952825	424.647		0.033397	3.08937	9.95639	4.26778	1.00695	5.67135	0.0727122	3.73501	0.651583	13.7529	3.73501	0.100438	4.26778	2.2044e-16		663.998	20.1801	1632.21	79.3023	707.331	28.8926	452.475	16.3205		72.2783	36.0306	37.8004	0.863745	0.001	0.476838		272.333	14.8841	717.067	580275	3.09565	1.8558	38.627	0.631536	4.0489	4.81868
B1725 M 184 10/14/2017 12:21:07 AM (Run: 1)			247.393	764.488	28.1959	3.09017	343.588		0.0123007	4.27545	9.92434	5.81837	0.981443	7.42997	0.0706424	4.62072	0.617599	14.1558	4.62072	0.100762	5.81837	2.58172e-16		247.106	10.5006	1638.21	108.03	694.345	37.3681	440.025	19.6539		73.1399	36.6274	37.8341	0.862502	0.001	0.477194		317.038	77.0764	1316.27	543784	54.6906	4.43886	53.6811	3.45265	25.3639	23.3788
B1725 S 239 10/14/2017 2:33:33 AM (Run: 1)			4125.2	1164.05	438.826	0.282181	356.127		0.0569832	9.88006	9.17685	5.73678	1.23185	11.7502	0.0819881	10.2546	0.87149	12.1969	10.2546	0.10897	5.73678	2.39904e-16		1120.13	107.659	1782.25	104.6	815.182	65.8518	507.979	50.0915		71.4979	37.6852	37.6906	0.867852	0.001	0.475666		3389.76	206.074	8079.77	358723	33.8648	24.4901	110.108	13.3686	110.67	52.232
B1725 M 160 10/13/2017 11:26:21 PM (Run: 1)			228.1	315.48	26.7999	1.38308	579.221		0.0293704	2.41439	9.39267	5.31238	1.04283	6.13565	0.0710398	3.06998	0.492572	14.0766	3.06998	0.106466	5.31238	0		585.089	13.9238	1739.76	97.3744	725.326	31.8033	442.417	13.1265		74.5702	39.0043	37.8287	0.862701	0.001	0.477137		265.401	37.522	950.398	540019	6.93594	1.1427	33.6594	0.891769	7.39478	9.98356
B1725 S 192 10/14/2017 12:41:50 AM (Run: 1)			20207.6	4115.16	1521.26	0.203644	15849.5		0.0252163	3.36124	17.5505	1.60272	-0.485176	5.12264	-0.0617572	-4.86546	-0.943857	-16.1924	-4.86546	0.0569784	1.60272	-4.89587e-16		503.355	16.71	490.7	35.3499	-674.144	-49.019	-410.937	20.645		183.745	39.0432	37.8648	0.861378	0.001	0.477517
B1725 S 196 10/14/2017 12:48:38 AM (Run: 1)			140.468	104.053	14.7745	0.740759	1394.96		0.03676	5.47527	8.60188	7.52215	1.16212	9.4202	0.0725007	5.67076	0.599206	13.793	5.67076	0.116254	7.52215	3.20886e-16		729.669	39.2388	1899.4	135.214	782.95	51.4116	451.204	24.7118		76.2449	42.3713	37.8245	0.862854	0.001	0.477093		274.669	37.2005	664.967	636140	27.4738	2.01645	27.7655	1.06486	4.21914	6.13633
B1725 S 237 10/14/2017 2:26:29 AM (Run: 1)			277.606	225.203	30.4304	0.811233	12951.7		0.0412931	7.64119	7.59954	3.78951	1.25276	7.19632	0.0690487	6.11773	0.846762	14.4825	6.11773	0.131587	3.78951	0		817.85	61.246	2119.26	66.4074	824.652	40.6344	430.422	25.4722		79.69	47.8056	37.8543	0.861761	0.001	0.477407		438.115	17.242	630.923	644197	4.85345	26.2318	65.5499	5.82647	28.2728	12.0467
B1725 XL 136 10/13/2017 10:03:59 PM (Run: 1)			223.02	136.459	43.0266	0.611867	3121.05		0.0306954	9.96795	12.2988	3.19233	1.78545	5.41107	0.159261	4.36907	0.801915	6.279	4.36907	0.0813088	3.19233	0		611.088	60.0013	1228.93	62.6694	1040.17	35.2181	952.669	38.6933		22.48	8.41209	36.8002	0.904199	0.001	0.465436		212.188	26.7721	612.503	635802	17.9871	0.642654	15.0482	0.352649	2.64283	2.55272
B1725 M 186 10/14/2017 12:24:30 AM (Run: 1)			446.158	160.847	135.255	0.360516	3702.79		0.082395	4.12218	10.6138	1.75358	2.81673	5.56557	0.216829	5.28209	0.944038	4.61194	5.28209	0.0942167	1.75358	-4.42064e-16		1600.32	63.4241	1512.45	33.1002	1360	41.7055	1265.1	60.6752		16.3544	6.97818	35.8628	0.946603	0.001	0.453212		280.772	7.60131	1296	543984	1.64466		8.21692	0.0506214	1.52748	5.08335
B1725 M 157 10/13/2017 11:14:16 PM (Run: 1)			139.377	52.0564	24.6583	0.373492	919.413		0.0518801	6.56555	13.0418	2.7533	1.5709	4.83106	0.148589	3.9697	0.814079	6.72999	3.9697	0.0766763	2.7533	-4.80132e-16		1022.31	65.4512	1112.77	54.9758	958.781	29.9734	893.047	33.1052		19.7454	6.85593	36.9612	0.897278	0.001	0.467383		233.186	17.0172	625.588	543536	4.56136	1.3535	12.4865	0.624495	4.48663	3.76046
B1725 S 204 10/14/2017 1:09:16 AM (Run: 1)			335.732	130.279	53.6283	0.388045	2965		0.0459614	11.2847	13.5749	3.91427	1.33181	5.3218	0.131122	3.60556	0.669782	7.62647	3.60556	0.0736653	3.91427	1.26866e-16		908.263	100.226	1032.31	79.1034	859.667	30.8629	794.264	26.9437		23.0598	7.60787	37.1174	0.890693	0.001	0.469231		283.17	13.2264	753.237	604200	2.669	0.0404503	20.4532	0.0535296	1.82793	4.97721
Oct 13th, 2017 Experiment 1
Isotope ratio and date errors do NOT include systematic calibration errors of 0.51% (207Pb/206Pb) and 1.19% (206Pb/238U) (all 2-sigma).
Trace element concentrations were deleted from analyses known to have intersected inclusions of other minerals based on P and Ti.
Ablation used a laser spot size of 25 microns, and a laser firing repetition rate of 10 Hz.
Activity of TiO2 for Ti-in-Zircon temperature calculation is 0.8.
Oct 13th, 2017 Experiment 2
Isotope ratio and date errors include systematic calibration errors of 0.54% (207Pb/206Pb) and 1.06% (206Pb/238U) (all 2-sigma).
Trace element concentrations were deleted from analyses known to have intersected inclusions of other minerals based on P and Ti.
Ablation used a laser spot size of 25 microns, and a laser firing repetition rate of 10 Hz.
Activity of TiO2 for Ti-in-Zircon temperature calculation is 0.8.
B1728 Tonalite, Cormack's Lake (48.2845° N, 57.8050° W)
Metamorphic Domains
B1728 S 404 12/22/2017 3:37:54 AM (Run: 1)		m	396.604	41.0188	28.0845	0.103425	824.206		0.0348297	11.8806	16.0438	3.77846	0.550764	6.27365	0.0640873	5.00819	0.795885	15.6037	5.00819	0.0623294	3.77846	1.8534e-16		692.002	80.8227	685.423	80.6551	445.497	22.624	400.434	19.4443		41.5785	10.1152	37.9009	0.860067	0.001	0.477894		813.621	4.46996	1578.88	347660	2.1025		3.5751		0.260413	2.41535
B1728 M 31 1/1/2018 10:32:27 PM (Run: 1)		m	589.026	58.4178	47.2009	0.0991769	1242.81		0.0480037	12.512	15.5395	2.34759	0.628338	5.66742	0.0708157	5.15834	0.910174	14.1212	5.15834	0.0643521	2.34759	-2.93378e-16		947.689	115.838	753.201	49.5611	495.06	22.2057	441.068	21.9909		41.4408	10.9061	495.846	21.9609	433.568	203.412		976.164	2.23432	1613.5	430930	2.11722	0.0790437	4.57283	0.14924	1.86764	4.88013
B1728 L 414 12/22/2017 3:58:48 AM (Run: 1)		m	13586.7	227.649	979.679	0.0167552	743.489		0.197801	26.0198	13.98	4.34855	0.628467	5.10988	0.0637218	2.68346	0.519604	15.6932	2.68346	0.0715308	4.34855	3.06734e-16		3648.03	868.479	972.605	88.6833	495.14	20.0237	398.22	10.3627		59.0563	19.5743	37.8901	0.860461	0.001	0.47778
B1728 S 358 12/22/2017 2:01:02 AM (Run: 1)		m	377.537	6.40969	29.5684	0.0169776	1113.11		0.0444798	23.401	17.7524	3.57155	0.580012	5.22864	0.0746781	3.81874	0.726654	13.3908	3.81874	0.0563303	3.57155	1.28062e-16		879.611	201.423	465.439	79.1174	464.469	19.4893	464.278	17.1062		0.249381	0.0410724	37.7829	0.864393	0.001	0.476652		1300.97		710.184	320633	0.436451		0.496661	0.00918899	0.813377	2.27618
B1728 L 411 12/22/2017 3:53:39 AM (Run: 1)		m	109.162	0.424887	8.06086	0.00389226	1800.09		0.210385	58.4712	16.9417	5.72224	0.585961	6.95345	0.0719988	3.9505	0.565371	13.8891	3.9505	0.0590258	5.72224	1.50514e-16		3859.27	2054.21	568.065	124.558	468.285	26.0859	448.186	17.1041		21.103	4.29192	37.8347	0.862479	0.001	0.477201		68.9918	0.811048	877.05	385398	2.37125		0.0434399
B1728 S 372 12/22/2017 2:32:08 AM (Run: 1)		m	218.837	39.8084	15.1398	0.181909	5019.59		0.0241191	14.4605	18.1562	4.23609	0.482809	7.54529	0.0635769	6.24395	0.825954	15.729	6.24395	0.0550775	4.23609	0		481.712	68.8346	415.342	94.6609	399.998	24.9457	397.342	24.0607		4.33369	0.663998	37.9226	0.859287	0.001	0.478119		1096.22	0.335098	1664.08	325100	0.874252		4.72401	0.0159286	0.292834	2.20183
Non-metamorphic Domains
B1728 L 409 12/22/2017 3:50:13 AM (Run: 1)			220.926	112.032	18.9879	0.5071	1062.63		0.0202742	6.02875	17.8781	3.13844	0.570403	5.08394	0.0739607	3.99957	0.782978	13.5207	3.99957	0.0559345	3.13844	-1.37108e-16		405.686	24.214	449.747	69.7138	458.275	18.75	459.974	17.756		-2.27379	-0.370559	37.8034	0.863634	0.001	0.47687		829.473	3.48219	3977.11	385121	2.06763		9.08612	0.0270636	1.21561	8.05816
B1728 L 410 12/22/2017 3:51:56 AM (Run: 1)			300.932	121.649	25.9553	0.40424	3138.46		0.023512	6.39293	16.3461	4.42831	0.62449	5.92583	0.074035	3.9377	0.661246	13.5071	3.9377	0.0611768	4.42831	-1.99024e-16		469.727	29.6831	645.487	95.1507	492.658	23.1306	460.419	17.4977		28.671	6.54371	37.7957	0.863918	0.001	0.476788		1038.79	3.86738	5647.63	390579	4.07995		16.154	0.0602728	1.88425	10.1065
B1728 L 413 12/22/2017 3:57:04 AM (Run: 1)			155.699	53.8263	13.1752	0.345707	567.476		0.0235234	10.1829	17.263	7.40183	0.59951	8.28959	0.0750604	3.73231	0.447784	13.3226	3.73231	0.0579275	7.40183	4.95482e-16		469.952	47.3024	526.989	162.248	476.923	31.548	466.571	16.7986		11.4648	2.17058	37.7959	0.863909	0.001	0.476791		930	2.8373	3983.05	381711	2.01581		7.71384	0.0664564	1.72051	7.25237
B1728 M 24 1/1/2018 10:13:38 PM (Run: 1)			171.407	74.0781	14.5026	0.432177	262.326		0.0219379	4.95606	18.0466	3.95091	0.543859	5.55879	0.0711838	3.9103	0.703444	14.0481	3.9103	0.055412	3.95091	1.1498e-16		438.619	21.504	428.915	88.0772	440.966	19.8833	443.284	16.7512		-3.35009	-0.525677	440.93	17.0287	443.596	1027.22		606.147	3.5	3093.77	510419	1.08824		6.80417	0.0441	0.985507	4.67238
B1728 M 26 1/1/2018 10:17:01 PM (Run: 1)			126.386	44.3088	11.1105	0.350582	214.131		0.0251149	10.451	17.9127	5.70395	0.576692	6.8106	0.0749212	3.72145	0.54642	13.3474	3.72145	0.0558262	5.70395	0		501.356	51.7521	445.47	126.793	462.334	25.2937	465.737	16.7209		-4.54942	-0.736067	462.282	17.0709	463.831	819.367		595.911	2.2119	2768.62	467529	1.08905	12.5428	41.3462	9.52901	48.5801	24.0283
B1728 M 27 1/1/2018 10:18:42 PM (Run: 1)			142.901	32.0674	11.6883	0.224402	428.401		0.0245794	8.19904	18.5565	4.94906	0.537782	6.70687	0.072377	4.52646	0.6749	13.8165	4.52646	0.0538895	4.94906	3.17182e-16		490.795	39.7558	366.462	111.543	436.961	23.8156	450.461	19.6938		-22.9217	-3.08945	436.754	20.0922	449.103	514.784		545.674	3.27926	1621.43	473196	2.02653		4.42272		0.27353	2.47262
B1728 M 30 1/1/2018 10:23:46 PM (Run: 1)			183.589	66.8024	16.4203	0.363869	3520.85		0.0284873	8.43593	17.5305	3.73818	0.588372	6.24736	0.0748076	5.00554	0.801226	13.3676	5.00554	0.0570434	3.73818	-1.89866e-16		567.742	47.2279	493.219	82.4142	469.828	23.4978	465.055	22.4587		5.71014	1.0158	469.899	22.782	459.332	789.144		573.646	3.6574	2624.86	431017	1.80825		8.55774	0.0137927	0.906184	5.69643
B1728 M 33 1/1/2018 10:35:50 PM (Run: 1)			181.706	66.244	15.7853	0.364567	602.536		0.026142	10.2402	17.5889	3.34277	0.573671	4.82628	0.0731812	3.48121	0.721304	13.6647	3.48121	0.0568541	3.34277	0		521.597	52.7291	485.875	73.7902	460.386	17.8645	455.293	15.3029		6.29419	1.10621	460.462	15.5298	451.588	803.7		629.655	3.47485	2708.82	458231	1.47249		6.56389		0.696197	4.5524
B1728 M 34 1/1/2018 10:37:31 PM (Run: 1)			126.635	39.7824	10.7295	0.314151	479.244		0.0240278	10.159	17.7246	5.24829	0.568319	6.65956	0.073058	4.09941	0.615567	13.6878	4.09941	0.0564187	5.24829	1.65128e-16		479.91	48.1799	468.91	116.191	456.927	24.5038	454.553	17.9922		3.06181	0.519564	456.963	18.3032	453.342	712.234		533.637	3.68163	2240.07	457239	0.858633		5.65264	0.0292016	1.00496	4.81875
B1728 M 37 1/1/2018 10:42:35 PM (Run: 1)			147.086	48.8804	13.4007	0.332326	669.833		0.0301557	7.40413	15.992	6.75477	0.657969	9.1495	0.0763145	6.17142	0.674509	13.1037	6.17142	0.0625313	6.75477	1.70449e-16		600.503	43.808	692.316	144.025	513.371	36.8686	474.087	28.2079		31.5216	7.65222	513.935	28.419	467.687	637.052		584.186	3.33295	3015.24	473991	1.25436		6.63311	0.0612705	0.265811	6.35368
B1728 M 38 1/1/2018 10:44:16 PM (Run: 1)			161.34	0.771728	11.9375	0.00478325	498.846		0.0572414	42.9312	17.1221	2.98474	0.56086	6.0474	0.0696484	5.2595	0.869713	14.3578	5.2595	0.0584039	2.98474	-2.26313e-16		1125.07	469.81	544.953	65.2247	452.086	22.0642	434.037	22.0766		20.3534	3.99242	452.359	22.2712	433.548	24.327		88.0727	2.62228	1422.01	493500	4.95147		0.0517139			0.199754
B1728 M 39 1/1/2018 10:45:57 PM (Run: 1)			183.49	80.3156	15.5129	0.43771	438.386		0.0205759	9.02085	17.7358	3.7497	0.555891	5.22626	0.0715056	3.64054	0.696587	13.9849	3.64054	0.056383	3.7497	2.60254e-16		411.661	36.7597	467.46	83.0367	448.848	18.9597	445.22	15.6614		4.75766	0.808341	448.903	15.8986	447.494	425.027		890.708	4.37187	3490.83	519052	1.70923	3.09681	14.1357	1.20241	9.01557	9.69052
B1728 M 40 1/1/2018 10:47:40 PM (Run: 1)			159.091	33.5119	12.5653	0.210646	1028.37		0.0290889	7.64215	17.851	4.17601	0.53287	5.95866	0.0689892	4.25047	0.713327	14.495	4.25047	0.0560194	4.17601	0		579.56	43.6618	453.144	92.7054	433.712	21.0326	430.063	17.6833		5.09356	0.841376	433.768	17.936	425.319	389.41		873.153	2.23228	1492.08	420396	1.12889	0.0618462	5.958	0.583743	12.9714	27.8675
B1728 M 41 1/1/2018 10:56:22 PM (Run: 1)			162.831	47.5928	13.5264	0.292284	1118.77		0.0262431	10.115	18.1118	3.13926	0.543961	6.3978	0.0714544	5.57466	0.871341	13.9949	5.57466	0.0552125	3.13926	2.03009e-16		523.589	52.2811	420.818	70.0834	441.033	22.8871	444.912	23.9658		-5.72552	-0.8796	440.973	24.3346	441.419	492.734		596.841	3.48034	2985.3	429765	1.23643		6.48598	0.031187	1.73027	6.37225
B1728 M 45 1/1/2018 11:03:07 PM (Run: 1)			158.206	37.2855	13.1386	0.235677	435.575		0.0301098	8.89817	17.2611	3.66929	0.573466	5.12535	0.0717917	3.57848	0.698192	13.9292	3.57848	0.0579338	3.66929	0		599.6	52.5699	527.253	80.4263	460.253	18.9672	446.941	15.4518		15.2322	2.89238	460.454	15.6466	441.514	528.392		597.119	2.75075	1968.82	421563	1.56766		5.00184		0.670628	3.08599
B1728 M 51 1/1/2018 11:20:15 PM (Run: 1)			175.509	54.4465	15.1329	0.310221	439.093		0.0264843	5.58191	17.4028	4.13637	0.584455	6.92598	0.0737682	5.55515	0.802074	13.556	5.55515	0.0574619	4.13637	-1.54613e-16		528.338	29.1093	509.333	90.9406	467.32	25.9407	458.818	24.6021		9.91779	1.81933	467.447	24.9249	455.541	668.047		559.304	4.72029	3296.41	420768	1.25253		5.46441		2.19393	8.77001
B1728 M 58 1/1/2018 11:32:04 PM (Run: 1)			181.745	53.6235	15.3249	0.295048	581.327		0.0257377	7.99226	17.5872	2.53147	0.569161	4.92333	0.0725991	4.22266	0.857684	13.7743	4.22266	0.0568594	2.53147	0		513.632	40.5336	486.079	55.879	457.472	18.1324	451.796	18.4246		7.0531	1.24072	457.557	18.6662	449.028	388.253		708.531	3.05851	3075.46	422479	1.74774		7.99046	0.0300839	1.1765	6.24726
B1728 S 363 12/22/2017 2:09:36 AM (Run: 1)			288.061	39.5972	20.5819	0.137461	5661.98		0.0254707	8.11208	17.1713	4.88082	0.527343	8.78378	0.0656744	7.30291	0.830255	15.2266	7.30291	0.0582366	4.88082	-1.94896e-16		508.37	40.7251	538.711	106.771	430.045	30.7942	410.042	29.0125		23.8846	4.65125	37.8899	0.860465	0.001	0.477779		899.401	3.06649	2361.86	342541	2.32624		5.19191		0.771764	3.05416
B1728 S 367 12/22/2017 2:23:31 AM (Run: 1)			553.839	300.21	49.1561	0.542052	1625.74		0.0258237	5.62508	16.4754	4.41896	0.586774	7.38123	0.070114	5.9123	0.799294	14.2625	5.9123	0.0606967	4.41896	-1.36692e-16		515.326	28.6211	628.48	95.2208	468.805	27.715	436.842	24.9718		30.4923	6.81799	37.817	0.86313	0.001	0.477014		1361.35	4.50634	6453.3	313503	5.28247		20.3662	0.0798942	2.44103	15.545
B1728 S 368 12/22/2017 2:25:14 AM (Run: 1)			244.197	39.7048	19.0084	0.162593	464.197		0.0286336	16.9718	16.8684	3.26858	0.581581	6.54555	0.0711512	5.67103	0.864398	14.0546	5.67103	0.0592825	3.26858	0		570.615	95.4893	577.501	71.0351	465.477	24.4396	443.087	24.2835		23.2751	4.81001	37.8332	0.862536	0.001	0.477184		753.56	2.66015	2126.57	329694	2.40237	12.6026	20.6058	4.02237	28.5954	10.2476
B1728 S 369 12/22/2017 2:26:58 AM (Run: 1)			162.7	0.222735	12.0567	0.00136899	362.853		1.11417	68.8642	18.1418	4.44656	0.542894	7.24592	0.0714323	5.72115	0.787779	13.9993	5.72115	0.0551213	4.44656	1.34483e-16		15132	7335.28	417.165	99.3302	440.331	25.8882	444.779	24.5885		-6.61957	-1.0102	37.8367	0.862408	0.001	0.477221		77.1088	3.31347	1148.43	317130	8.58982		0.00391025
B1728 S 377 12/22/2017 2:44:17 AM (Run: 1)			140.069	43.3501	11.4932	0.309491	291.345		0.0269315	9.54166	18.0138	4.01702	0.556698	6.70967	0.0727319	5.37431	0.798915	13.7491	5.37431	0.0555129	4.01702	-3.16049e-16		537.143	50.5773	432.964	89.4879	449.375	24.3639	452.594	23.4896		-4.5339	-0.716226	37.8244	0.862858	0.001	0.477092		938.41	2.58746	3037.67	345274	0.69361	0.155236	5.34057	0.794952	5.33471	17.9187
B1728 S 384 12/22/2017 2:56:17 AM (Run: 1)			125.693	39.6725	10.6864	0.31563	3048.01		0.0263551	10.2977	17.0738	4.0547	0.609207	7.66184	0.0754389	6.50102	0.846993	13.2558	6.50102	0.0585691	4.0547	0		525.795	53.4468	551.106	88.5146	483.06	29.4521	468.84	29.3974		14.9274	2.94374	37.7941	0.863977	0.001	0.476772		1650.15	3.66055	2953.9	319512	0.748535	8.45229	24.4928	3.92377	27.3911	15.8345
B1728 S 387 12/22/2017 3:05:05 AM (Run: 1)			164.023	55.1274	13.8362	0.336094	323.713		0.0258882	7.66783	17.3901	4.37998	0.588811	7.22322	0.0742638	5.74374	0.793373	13.4655	5.74374	0.0575039	4.37998	0		516.598	39.1099	510.893	96.2729	470.108	27.1809	461.792	25.5964		9.61073	1.76884	37.8047	0.863584	0.001	0.476884		787.513	3.83218	2935.06	324682	1.38466		6.8198	0.0130749	1.03361	4.7104
B1728 S 389 12/22/2017 3:08:31 AM (Run: 1)			82.0666	17.0451	6.66023	0.207699	1303.38		0.0250341	19.5041	17.526	7.79574	0.591396	10.021	0.0751727	6.29657	0.627149	13.3027	6.29657	0.057058	7.79574	-1.38368e-16		499.763	96.2793	493.807	171.851	471.759	37.813	467.244	28.3795		5.37907	0.956894	37.8011	0.863719	0.001	0.476845		979.928	3.19192	2077.08	344171	0.526949		1.70597		0.762185	3.44232
B1728 S 391 12/22/2017 3:11:56 AM (Run: 1)			302.007	118.321	25.3239	0.391782	0		0.0273038	8.11411	17.369	4.60388	0.562023	6.04732	0.070799	3.92101	0.645223	14.1245	3.92101	0.0575739	4.60388	0		544.468	43.589	513.57	101.148	452.842	22.0932	440.968	16.7123		14.1368	2.62224	37.8322	0.862572	0.001	0.477174		1819.03	2.20097	6359.36	334738	1.41077	5.60932	22.3012	2.41497	26.9108	29.5402
B1728 S 394 12/22/2017 3:17:05 AM (Run: 1)			158.787	54.9385	12.7234	0.345988	514.684		0.0255798	9.84518	16.8114	4.1085	0.572242	6.88514	0.0697722	5.52497	0.800473	14.3324	5.52497	0.0594834	4.1085	-1.50913e-16		510.52	49.6322	584.805	89.1809	459.463	25.445	434.783	23.2295		25.6533	5.3715	37.8542	0.861765	0.001	0.477406		881.914	2.95175	3200.85	337310	1.13375	2.17033	11.2037	1.95045	14.4616	17.7133
B1728 S 398 12/22/2017 3:27:38 AM (Run: 1)			136.248	33.7307	10.6628	0.247569	418.336		0.0273567	15.8757	16.5517	6.97777	0.582944	9.27126	0.0699792	6.10466	0.657119	14.29	6.10466	0.0604167	6.97777	-1.60693e-16		545.509	85.4451	618.52	150.608	466.352	34.6681	436.03	25.7379		29.5043	6.50186	37.8526	0.861824	0.001	0.477389		859.112	2.52204	2573.97	334429	0.838923	0.0920278	4.01286	0.0623136	0.519539	6.23656
B1728 S 399 12/22/2017 3:29:21 AM (Run: 1)			251.692	46.4207	19.6888	0.184434	769.484		0.0287847	11.1741	16.8418	3.63457	0.577085	6.22677	0.0704899	5.05594	0.809574	14.1864	5.05594	0.0593761	3.63457	1.8878e-16		573.584	63.1917	580.94	78.943	462.586	23.1354	439.106	21.4617		24.4145	5.07584	37.8362	0.862426	0.001	0.477216		677.365	3.57151	2239.06	333112	2.20541		5.17323		0.640217	4.02839
B1728 S 401 12/22/2017 3:32:47 AM (Run: 1)			155.635	51.9391	12.6657	0.333724	2130.61		0.0255544	8.73091	16.8309	4.48702	0.584712	6.85004	0.0713755	5.17588	0.75347	14.0104	5.17588	0.0594144	4.48702	1.47384e-16		510.021	43.9723	582.318	97.4366	467.485	25.6634	444.437	22.2285		23.678	4.93024	37.8369	0.862399	0.001	0.477223		706.506	2.95612	3307.35	349203	1.02622	0.10635	5.65281	0.0370737	1.53263	7.55116
B1728 S 403 12/22/2017 3:36:12 AM (Run: 1)			145.445	55.2508	11.8924	0.379875	437.107		0.0283464	11.2591	16.8416	6.56775	0.569587	8.35058	0.0695733	5.15721	0.615835	14.3733	5.15721	0.0593767	6.56775	-2.02074e-16		564.972	62.7299	580.926	142.654	457.747	30.7696	433.585	21.6255		25.3632	5.27867	37.8572	0.861655	0.001	0.477437		657.185	3.02018	3635.46	335451	0.787323		5.3187	0.0414405	2.28555	8.58608
B1728 S 405 12/22/2017 3:39:37 AM (Run: 1)			306.731	125.122	27.4934	0.407921	697.587		0.0275014	5.69699	17.7282	3.27991	0.589871	6.16253	0.0758438	5.21717	0.844247	13.185	5.21717	0.0564074	3.27991	-2.03195e-16		548.357	30.8199	468.435	72.6204	470.786	23.2158	471.267	23.7096		-0.604442	-0.102242	37.7736	0.864738	0.001	0.476554		1183.2	3.25664	5368.15	328913	2.3598		11.309	0.114219	3.28817	15.9147
B1728 S 406 12/22/2017 3:41:20 AM (Run: 1)			146.574	39.4183	11.7427	0.268931	376.497		0.023411	7.0868	16.307	6.48411	0.61138	8.20879	0.0723077	5.03395	0.611409	13.8298	5.03395	0.0613233	6.48411	0		467.733	32.7667	650.586	139.208	484.43	31.6244	450.044	21.8823		30.8249	7.09825	37.8278	0.862735	0.001	0.477127		820.762	2.32217	2904.49	327724	0.73116		3.87471	0.0873699	2.3201	6.53804
DISCORDANT ANALYSES
B1728 S 393 12/22/2017 3:15:23 AM (Run: 1)			281.581	93.8151	22.9255	0.333172	774.792		0.0276027	5.46784	15.5447	4.06795	0.616442	6.29231	0.0694983	4.80052	0.760431	14.3888	4.80052	0.0643305	4.06795	-1.77626e-16		550.349	29.6862	752.5	85.8899	487.615	24.3653	433.133	20.1095		42.4408	11.1733	37.8475	0.862011	0.001	0.477335		907.451	2.56119	3108.75	318080	2.12159	0.221982	6.86115	0.36848	6.96218	12.9706
B1728 S 359 12/22/2017 2:02:46 AM (Run: 1)			231.435	75.0507	22.6298	0.324284	2687.68		0.0266691	11.2111	14.6562	3.80881	0.812301	5.76008	0.086345	4.32105	0.747207	11.5814	4.32105	0.0682305	3.80881	0		531.977	58.8622	875.568	78.8546	603.744	26.2147	533.885	22.14		39.0242	11.571	37.6674	0.86873	0.001	0.475417		1113.59	4.79703	4234.09	334831	2.34293	0.0225836	5.02826	0.0628283	1.5866	6.71132
B1728 M 43 1/1/2018 10:59:44 PM (Run: 1)			172.052	47.827	14.3757	0.27798	478.095		0.0332943	9.50306	15.2302	5.8179	0.631191	7.507	0.0697214	4.74416	0.631965	14.3428	4.74416	0.0656589	5.8179	-3.86149e-16		661.99	61.8903	795.547	121.987	496.838	29.4953	434.477	19.933		45.3864	12.5515	497.743	19.9378	424.837	344.083		654.742	3.48783	2540.77	435566	1.08324	0.323192	7.89762	0.171465	2.43272	5.24933
B1728 M 55 1/1/2018 11:27:00 PM (Run: 1)			175.659	30.7027	13.8046	0.174786	262.344		0.0452757	28.0652	15.1458	11.6103	0.603532	12.4862	0.0662965	4.59399	0.367927	15.0837	4.59399	0.066025	11.6103	-2.66432e-16		895.007	245.705	807.161	242.992	479.473	47.7179	413.805	18.4129		48.7333	13.6959	480.44	18.6815	401.059	398.099		797.679	4.24716	1889.45	425535	0.868013		5.11665	0.052494	1.23657	5.27644
B1728 M 25 1/1/2018 10:15:20 PM (Run: 1)			161.379	52.3516	13.205	0.324401	387.15		0.027132	12.4919	15.0104	8.68505	0.628878	10.0142	0.0684634	4.98541	0.497833	14.6063	4.98541	0.0666203	8.68505	0		541.089	66.6957	825.894	181.229	495.396	39.2576	426.892	20.5929		48.3116	13.8283	496.391	20.6635	421.215	768.446		615.524	4.01201	3717.33	511384	0.815821	0.0470449	4.92595	0.0403671	2.08382	7.88372
B1728 M 59 1/1/2018 11:33:45 PM (Run: 1)			335.949	130.826	27.5212	0.389422	899.324		0.0315534	14.1286	14.7923	7.00443	0.607955	8.32115	0.0652237	4.49217	0.539849	15.3318	4.49217	0.0676028	7.00443	0		627.907	87.3504	856.381	145.455	482.27	31.9456	407.316	17.7312		52.4375	15.5419	483.37	17.7043	393.938	573.171		811.845	3.98678	3619.73	462792	2.72525	16.5064	78.3845	14.3192	109.204	46.6611
B1728 S 380 12/22/2017 2:49:26 AM (Run: 1)			167.682	75.4301	15.4508	0.44984	434.828		0.0330612	8.95652	14.2108	6.58679	0.726606	7.6124	0.0748885	3.81612	0.498737	13.3532	3.81612	0.0703692	6.58679	-2.72497e-16		657.429	57.9354	939.155	135.022	554.559	32.528	465.54	17.1393		50.4299	16.0522	37.7972	0.863863	0.001	0.476804		1051.61	2.79929	3827.26	318579	1.16915	29.2547	88.6943	26.8098	140.103	89.4649
B1728 S 386 12/22/2017 2:59:43 AM (Run: 1)			94.9077	0.0627495	6.66633	0.000661164	259.478		1.23345	66.7933	14.4668	6.85854	0.647189	8.79336	0.067905	5.50306	0.624274	14.7265	5.50306	0.0691239	6.85854	-1.80027e-16		16241.4	7455.75	902.411	141.4	506.748	35.081	423.522	22.5575		53.0678	16.4236	37.8815	0.860772	0.001	0.477691		103.506	0.967033	1006.77	325787	7.81077		0.0211508
B1728 M 49 1/1/2018 11:09:52 PM (Run: 1)			250.464	252.7	25.6266	1.00893	1084.42		0.0298829	12.8186	14.1041	4.05464	0.658783	6.81631	0.0673885	5.47922	0.803841	14.8393	5.47922	0.0709014	4.05464	0		595.149	75.1776	954.559	82.9192	513.869	27.4873	420.403	22.2998		55.9584	18.1887	515.203	22.0156	390.092	1843.9		3476.74	5.14441	6960.93	428047	1.33945	442.409	1432.84	369.149	2791.65	1322.19
B1728 M 36 1/1/2018 10:40:54 PM (Run: 1)			148.038	50.9846	13.6221	0.344402	1058.29		0.033911	9.15339	13.7355	5.38892	0.751725	7.86153	0.0748862	5.72392	0.728092	13.3536	5.72392	0.0728041	5.38892	-1.15177e-16		674.049	60.6808	1008.5	109.299	569.225	34.2555	465.527	25.707		53.8397	18.2174	570.636	25.4232	454.526	715.642		652.563	3.97132	3559.2	488034	0.953404		5.38654	0.0263523	1.85141	8.39369
B1728 S 366 12/22/2017 2:14:44 AM (Run: 1)			100.521	24.505	8.35859	0.243781	2108.23		0.0417374	15.5057	13.7102	5.09271	0.713261	6.91203	0.0709234	4.67337	0.673832	14.0997	4.67337	0.0729386	5.09271	0		826.473	125.565	1012.23	103.233	546.681	29.2187	441.717	19.9517		56.3621	19.2002	37.8456	0.86208	0.001	0.477315		882.725	2.78213	2352.08	329603	0.687187		2.754		0.775779	3.03935
B1728 M 54 1/1/2018 11:25:19 PM (Run: 1)			147.842	43.5364	13.2696	0.294479	341.35		0.0386986	12.9867	13.6082	3.55267	0.739595	6.55669	0.0729952	5.51078	0.840482	13.6995	5.51078	0.073485	3.55267	-1.81464e-16		767.426	97.7953	1027.36	71.8495	562.169	28.3048	454.175	24.1673		55.7921	19.2102	563.647	23.805	440.087	679.198		479.275	4.5757	3016.7	440380	1.01663	0.193116	6.11762	0.12658	1.99989	7.62757
B1728 M 52 1/1/2018 11:21:56 PM (Run: 1)			249.954	86.3342	25.2469	0.3454	263822		0.0445059	11.0588	13.1797	3.15449	0.832682	7.94955	0.0795944	7.29689	0.917899	12.5637	7.29689	0.0758745	3.15449	-1.54345e-16		880.117	95.2416	1091.78	63.182	615.099	36.6745	493.701	34.6799		54.7802	19.7363	616.687	34.0954	473.238	626.646		664.92	4.47837	3181.39	435643	1.85886	0.0253005	9.09894	0.0765389	1.55389	7.09561
B1728 M 48 1/1/2018 11:08:11 PM (Run: 1)			402.212	123.26	34.0459	0.306456	974.646		0.0402545	11.4012	13.7627	4.1301	0.675362	6.69153	0.0674122	5.26487	0.786796	14.8341	5.26487	0.0726603	4.1301	0		797.68	89.1737	1004.51	83.8173	523.967	27.3894	420.546	21.4344		58.1341	19.7382	525.429	21.1062	402.736	659.263		1103.03	3.79027	3893.57	419271	3.80514	260.112	580.205	90.1183	551.2	221.139
B1728 S 381 12/22/2017 2:51:08 AM (Run: 1)			180.998	64.7203	20.5382	0.357575	373.754		0.0522046	17.8444	11.8463	10.94	1.05318	11.3848	0.0904864	3.15118	0.274709	11.0514	3.15118	0.0844149	10.94	0		1028.55	178.946	1302.14	212.539	730.457	59.2967	558.413	16.856		57.1158	23.5529	37.6217	0.870476	0.001	0.474921		1856.02	2.23762	4408.01	316484	1.50846	2.07469	12.2276	1.423	8.01573	17.9245
B1728 S 390 12/22/2017 3:10:14 AM (Run: 1)			302.387	115.86	27.8908	0.383152	987.034		0.0382414	8.65701	12.3963	6.55038	0.818695	8.37192	0.0736057	5.2136	0.621029	13.5859	5.2136	0.0806695	6.55038	2.02931e-16		758.528	64.449	1213.41	128.88	607.32	38.2664	457.843	23.0421		62.2683	24.6127	37.8018	0.863692	0.001	0.476853
B1728 S 388 12/22/2017 3:06:49 AM (Run: 1)			173.173	49.7953	16.1892	0.287547	3817.22		0.0464742	10.1909	12.0335	7.34996	0.87815	8.91026	0.0766409	5.03695	0.563628	13.0479	5.03695	0.0831011	7.34996	-1.85251e-16		918.17	91.4763	1271.6	143.412	639.983	42.3018	476.041	23.114		62.5637	25.6165	37.7765	0.864628	0.001	0.476585		824.767	2.82096	2784.68	327958	1.95352		5.79053	0.0439942	1.11263	4.89538
B1728 S 374 12/22/2017 2:35:34 AM (Run: 1)			174.87	55.0482	18.3597	0.314795	681.756		0.0679906	35.3739	11.7083	19.9412	0.939646	21.3245	0.0797915	7.55523	0.353837	12.5327	7.55523	0.0854096	19.9412	-3.64144e-16		1329.53	455.173	1324.84	386.183	672.697	104.894	494.878	35.99		62.6461	26.4337	37.7415	0.865937	0.001	0.476212		738.603	3.64224	2470.81	320412	1.51123	0.0442084	5.78328	0.0354776	1.94115	4.97784
B1728 M 29 1/1/2018 10:22:05 PM (Run: 1)			196.217	70.5545	19.0181	0.359573	1104.85		0.0453756	10.4823	11.8907	2.80908	0.862186	5.52893	0.0743546	4.76215	0.861316	13.4491	4.76215	0.0840992	2.80908	0		896.94	91.9644	1294.87	54.6298	631.316	25.9925	462.338	21.2462		64.2947	26.766	633.486	20.5721	438.171	532.75		657.915	5.87401	3092.16	424956	1.27791	0.441431	7.33296	0.123101	2.80895	6.11356
B1728 L 412 12/22/2017 3:55:22 AM (Run: 1)			179.697	75.9553	17.8134	0.422685	207.141		0.0398413	6.53934	11.6976	6.93233	0.924395	7.79326	0.0784248	3.56057	0.45414	12.7511	3.56057	0.0854876	6.93233	1.39133e-16		789.65	50.6422	1326.63	134.217	664.682	38.0113	486.714	16.6917		63.312	26.775	37.7553	0.865419	0.001	0.47636
B1728 S 376 12/22/2017 2:38:59 AM (Run: 1)			309.987	134.554	32.7339	0.434062	305.11		0.0483278	10.7512	11.4222	4.14997	0.961517	6.16275	0.0796534	4.55601	0.736633	12.5544	4.55601	0.0875491	4.14997	-1.83549e-16		953.939	100.177	1372.62	79.8343	684.082	30.6739	494.054	21.6682		64.0066	27.7786	37.7323	0.866282	0.001	0.476113		1470.6	3.69156	5378.22	325445	2.74136	20.2637	80.9669	16.5852	120.266	66.3286
B1728 M 32 1/1/2018 10:34:09 PM (Run: 1)			328.502	124.306	29.3063	0.378403	1177.56		0.0423238	14.0011	11.9822	9.63975	0.777397	11.0309	0.067558	5.36235	0.486123	14.8021	5.36235	0.0834574	9.63975	1.37458e-16		837.846	114.909	1279.94	187.867	583.998	48.9889	421.427	21.8755		67.0746	27.8376	586.172	21.4835	396.842	839.475		943.831	11.9391	6236.35	457726	1.73268	0.22066	13.5365	0.644653	8.48115	21.6986
B1728 S 392 12/22/2017 3:13:39 AM (Run: 1)			188.231	68.2917	20.4147	0.362809	1694.04		0.0495429	7.98357	11.0828	7.05902	1.06813	8.46924	0.0858558	4.67955	0.55064	11.6474	4.67955	0.0902302	7.05902	0		977.352	76.1712	1430.39	134.726	737.822	44.414	530.981	23.8517		62.8786	28.0339	37.6725	0.868536	0.001	0.475472		800.417	4.19156	2850.21	322979	1.65195	0.0728095	6.85437	0.121535	1.46295	6.14874
B1728 S 385 12/22/2017 2:58:00 AM (Run: 1)			156.814	49.1002	15.7755	0.313112	421.428		0.0535418	10.4231	11.1603	7.67404	0.985818	9.96273	0.0797941	6.35334	0.63653	12.5322	6.35334	0.0896034	7.67404	-1.40525e-16		1054.22	107.066	1417.1	146.727	696.584	50.2187	494.894	30.2657		65.0771	28.9542	37.7423	0.865908	0.001	0.47622		1190.56	11.4858	3363.92	333412	0.755664	0.114375	5.6256	0.183573	4.99339	16.601
B1728 S 360 12/22/2017 2:04:28 AM (Run: 1)			501.296	118.294	57.2088	0.235976	484.213		0.080949	16.5469	10.5866	7.33732	1.13592	10.7823	0.0872175	7.90073	0.731884	11.4656	7.90073	0.0944591	7.33732	1.2201e-16		1573.3	250.459	1517.3	138.407	770.573	58.2243	539.06	40.8576		64.4724	30.0442	37.6286	0.87021	0.001	0.474997		1375.33	4.19595	4833.36	310329	2.42368	0.121449	8.76547	0.132014	4.09311	10.5477
B1728 S 357 12/22/2017 1:59:20 AM (Run: 1)			123.276	31.2885	13.1887	0.253808	209.873		0.0741985	15.6634	10.0679	7.75047	1.14433	9.93808	0.0835583	6.22058	0.62474	11.9677	6.22058	0.0993256	7.75047	0		1446.68	218.68	1611.49	144.402	774.563	53.8508	517.327	30.9233		67.8977	33.2104	37.7048	0.867314	0.001	0.475819		719.09	5.53427	2355.49	324213	0.495472		2.71913	0.0556353	0.723272	4.13726
B1728 S 356 12/22/2017 1:50:31 AM (Run: 1)			158.55	50.9427	16.5708	0.321303	1714.77		0.0717094	25.8639	10.348	27.291	1.02699	28.4593	0.0770761	8.0706	0.283263	12.9742	8.0706	0.0966372	27.291	0		1399.79	349.788	1560.2	511.886	717.42	146.409	478.646	37.2304		69.3214	33.2822	37.7728	0.864766	0.001	0.476546		662.414	3.75464	2633.17	319571	0.840182		6.42617	0.0365653	0.72024	5.27298
B1728 S 365 12/22/2017 2:13:01 AM (Run: 1)			321.084	111.654	34.6532	0.34774	226.522		0.0727472	24.6498	10.1773	22.5679	1.03432	24.1685	0.0763463	8.64888	0.357504	13.0982	8.64888	0.0982576	22.5679	5.7398e-16		1419.35	337.866	1591.31	421.578	721.086	124.771	474.277	39.547		70.1959	34.2274	37.762	0.865172	0.001	0.47643		1449.25	5.26545	5690.5	325499	2.42963		12.4929	0.129132	5.24608	16.4198
B1728 M 50 1/1/2018 11:11:33 PM (Run: 1)			355.929	33.7976	34.9008	0.0949561	509.314		0.149169	21.803	10.0953	3.98823	1.0425	5.25193	0.07633	3.41713	0.650644	13.101	3.41713	0.099056	3.98823	-1.30343e-16		2810.28	572.035	1606.43	74.3549	725.162	27.2185	474.179	15.6218		70.4824	34.6106	728.122	14.914	439.637	105.365		501.773	19.7378	1472.16	420187	1.32677	0.108663	4.44393	0.179965	2.09877	3.74578
B1728 L 408 12/22/2017 3:48:31 AM (Run: 1)			124.248	42.5397	11.5241	0.342377	159.389		0.0487187	8.99665	9.81648	7.18269	1.01058	9.38057	0.071949	6.03357	0.64186	13.8987	6.03357	0.10187	7.18269	-4.71969e-16		961.473	84.4753	1658.46	133.016	709.167	47.8749	447.887	26.1062		72.9938	36.8432	37.8338	0.862515	0.001	0.47719		641.358	3.27126	2552.01	407251	1.08502		4.37487	0.0427474	0.408247	4.29477
B1728 S 373 12/22/2017 2:33:51 AM (Run: 1)			363.682	157.283	35.4391	0.432473	319.786		0.0477072	5.31509	9.63421	3.71897	1.01341	6.4687	0.0708108	5.29277	0.816042	14.1221	5.29277	0.103797	3.71897	3.54758e-16		941.97	48.9178	1693.09	68.5691	710.595	33.0598	441.038	22.5625		73.9506	37.9339	37.8274	0.86275	0.001	0.477123
B1728 S 379 12/22/2017 2:47:43 AM (Run: 1)			225.783	82.9755	24.9605	0.367501	283.447		0.0674551	11.3227	9.15899	5.56963	1.20041	6.98842	0.0797401	4.22104	0.601478	12.5407	4.22104	0.109182	5.56963	0		1319.4	144.62	1785.81	101.507	800.777	38.7111	494.571	20.0953		72.3054	38.2385	37.7379	0.866071	0.001	0.476174
B1728 S 361 12/22/2017 2:06:11 AM (Run: 1)			531.476	172.901	58.4284	0.325322	268.362		0.0740459	19.1328	9.18436	8.99008	1.14795	11.3419	0.0764664	6.91504	0.608746	13.0776	6.91504	0.108881	8.99008	1.15718e-16		1443.81	266.605	1780.78	163.946	776.275	61.5482	474.996	31.6652		73.3265	38.8108	37.7368	0.866114	0.001	0.476161		1209.59	5.40738	5989.76	319519	5.59221	0.0192109	20.9954	0.26486	5.17152	13.0017
B1728 M 53 1/1/2018 11:23:37 PM (Run: 1)			301.97	92.2892	30.9444	0.305624	282.862		0.0664905	11.0826	9.21614	3.9723	1.10877	5.55737	0.0741124	3.88655	0.69935	13.493	3.88655	0.108505	3.9723	0		1301.12	139.655	1774.46	72.4972	757.584	29.6697	460.884	17.2872		74.0268	39.164	760.977	16.2249	421.039	404.721		1397.44	8.87314	4843.77	434620	2.16939	4.09875	22.5325	5.13428	48.63	84.182
B1728 M 46 1/1/2018 11:04:48 PM (Run: 1)			160.986	47.0331	17.9253	0.292156	162.477		0.0803546	10.1412	8.628	7.16212	1.25837	8.31887	0.078744	4.23174	0.508691	12.6994	4.23174	0.115902	7.16212	2.34439e-16		1562.18	152.456	1893.95	128.825	827.175	47.066	488.621	19.913		74.201	40.9289	830.814	18.9285	439.947	673.671		592.473	113.582	3031.94	422265	1.29184	0.198314	6.59395	0.163839	2.92104	7.67905
B1728 S 378 12/22/2017 2:46:00 AM (Run: 1)			139.412	46.1439	15.179	0.33099	627.745		0.0687654	12.9423	8.41775	6.68831	1.31146	7.26899	0.080066	2.84688	0.388047	12.4897	2.84688	0.118797	6.68831	3.58754e-16		1344.19	168.31	1938.21	119.672	850.766	41.8767	496.517	13.6046		74.3826	41.6389	37.7419	0.865921	0.001	0.476216		648.929	4.24511	2303.58	323291	1.18329		5.67947		0.862603	3.80377
B1728 S 407 12/22/2017 3:46:46 AM (Run: 1)			541.086	48.8453	75.9969	0.0902726	252.733		0.30644	8.55166	7.132	3.77282	1.93872	6.15272	0.100282	4.86023	0.787398	9.97184	4.86023	0.140213	3.77282	-1.91115e-16		5402.82	405.432	2229.85	65.3153	1094.56	41.2149	616.063	28.5558		72.372	43.7157	37.4906	0.875568	0.001	0.473482
B1728 S 383 12/22/2017 2:54:34 AM (Run: 1)			208.896	46.13	20.4199	0.220827	387.082		0.0965195	11.7709	8.28633	10.5642	1.17242	14.0122	0.07046	9.20542	0.656379	14.1925	9.20542	0.120681	10.5642	-1.41456e-16		1862.37	209.421	1966.31	188.399	787.774	76.7846	438.926	39.0601		77.6777	44.2827	37.8434	0.86216	0.001	0.477292		654.314	5.6942	2220.8	342461	2.40352	0.065582	6.57596	0.122041	2.88466	6.33569
B1728 M 57 1/1/2018 11:30:23 PM (Run: 1)			391.75	51.0824	40.3654	0.130395	220.277		0.138724	9.8722	7.94912	16.739	1.30883	17.1657	0.075457	3.8034	0.22157	13.2526	3.8034	0.1258	16.739	8.92852e-16		2625.73	243.086	2040.08	295.979	849.611	98.8055	468.949	17.2027		77.0132	44.8042	853.612	19.422	425.058	287.406		799.282	20.0538	2132.96	418096	2.3955	0.197742	7.43745	0.131108	2.20747	6.73707
B1728 M 42 1/1/2018 10:58:03 PM (Run: 1)			497.065	222.457	57.8832	0.447541	187.073		0.0659774	6.85505	7.77419	4.50663	1.36592	6.30229	0.0770158	4.40559	0.699045	12.9843	4.40559	0.128631	4.50663	0		1291.4	85.7571	2079.34	79.331	874.415	36.9449	478.286	20.3086		76.9981	45.3022	878.489	18.5799	420.695	792.704		2200.44	6.4471	8203.29	413644	4.8893	92.8511	300.37	65.6225	358.955	349.449
B1728 S 395 12/22/2017 3:18:49 AM (Run: 1)			395.478	196.737	36.2572	0.497466	256.963		0.0462795	10.4704	8.42501	7.10828	1.02232	9.80039	0.0624676	6.74685	0.687289	16.0083	6.74685	0.118694	7.10828	1.4556e-16		914.409	93.609	1936.67	127.209	715.077	50.3048	390.615	25.5716		79.8306	45.3744	37.923	0.85927	0.001	0.478124
B1728 S 375 12/22/2017 2:37:16 AM (Run: 1)			152.434	40.011	18.9252	0.262481	209.218		0.107418	17.3208	7.00145	8.32313	1.71445	11.24	0.0870587	7.55405	0.671191	11.4865	7.55405	0.142828	8.32313	0		2062.27	339.584	2261.78	143.595	1013.95	72.0842	538.118	38.9993		76.2082	46.9286	37.6614	0.86896	0.001	0.475351		957.496	2.43976	3181.25	315865	0.917729	0.0277868	5.22068	0.153908	1.65933	8.50701
B1728 M 47 1/1/2018 11:06:29 PM (Run: 1)			184.231	35.1813	22.1051	0.190963	327.728		0.150824	17.3125	6.77478	6.90165	1.61707	9.67753	0.0794554	6.78394	0.700999	12.5857	6.78394	0.147606	6.90165	0		2839.37	458.599	2318.37	118.358	976.856	60.7167	492.872	32.1899		78.7406	49.5451	981.392	28.7662	422.08	435.999		465.323	10.2458	2166.24	432862	1.52558	0.334516	7.37203	0.191356	3.78111	6.02415
B1728 M 44 1/1/2018 11:01:26 PM (Run: 1)			221.512	88.6373	29.2743	0.400146	230.824		0.081685	4.89177	6.27749	2.17837	1.88458	5.07	0.0858022	4.57817	0.902991	11.6547	4.57817	0.159299	2.17837	0		1587.06	74.6656	2448.23	36.8595	1075.67	33.6333	530.663	23.3216		78.3247	50.667	1080.35	20.263	464.354	953.444		766.09	18.532	3016.77	432866	1.92224	0.0519721	8.8508	0.105361	2.29951	6.29674
B1728 S 371 12/22/2017 2:30:25 AM (Run: 1)			130.109	39.1432	16.2382	0.300849	2740.45		0.098663	12.6723	6.27203	13.472	1.88344	15.466	0.0856758	7.59615	0.49052	11.6719	7.59615	0.159438	13.472	-1.32975e-16		1901.84	230.015	2449.7	227.923	1075.27	102.577	529.912	38.6429		78.3683	50.7184	37.6835	0.868121	0.001	0.47559		574.782	5.20017	2573.14	319299	0.768708		4.43716		0.779024	4.19688
B1728 S 382 12/22/2017 2:52:51 AM (Run: 1)			102.657	23.3695	13.0289	0.227645	1503.07		0.146374	14.2402	6.28474	6.04492	1.8445	10.4425	0.0840744	8.51499	0.814576	11.8942	8.51499	0.159116	6.04492	-2.65158e-16		2761.06	367.508	2446.28	102.305	1061.47	68.7555	520.397	42.5703		78.727	50.9738	37.6984	0.867557	0.001	0.47575		1000.97	1.22084	2511.73	327606	0.728794		2.25299		1.13919	5.69967
B1728 M 56 1/1/2018 11:28:41 PM (Run: 1)			375.352	137.465	56.9438	0.36623	100.697		0.128527	6.94412	5.45264	6.31698	2.23589	6.89465	0.0884209	2.76259	0.400687	11.3095	2.76259	0.183397	6.31698	0		2443.91	159.85	2683.83	104.458	1192.37	48.3725	546.192	14.4675		79.6488	54.1927	1197.36	14.204	435.297	771.54		2110.67	2.88479	6246.59	407388	2.45349	0.449642	19.1677	1.13355	16.6821	24.7304
B1728 S 370 12/22/2017 2:28:41 AM (Run: 1)			142.554	54.579	22.6383	0.382866	88.5684		0.136105	13.6645	4.87811	7.29531	2.59603	8.2214	0.0918458	3.79077	0.458706	10.8878	3.79077	0.204997	7.29531	-2.47695e-16		2579.18	330.872	2866.4	118.64	1299.52	60.2646	566.444	20.5563		80.2384	56.4112	37.6089	0.870968	0.001	0.474782		1190.08	2.80996	3845.58	317494	0.68418	22.303	76.5537	20.5835	136.364	152.793
B1728 S 362 12/22/2017 2:07:54 AM (Run: 1)			947.879	12.7677	123.75	0.0134698	68.5545		2.73254	28.9138	5.22881	8.87675	2.15672	9.84838	0.0817893	4.26541	0.431349	12.2265	4.26541	0.191248	8.87675	-5.417e-16		26621.2	4278.39	2752.93	145.845	1167.22	68.3207	506.794	20.789		81.5908	56.5811	37.722	0.866667	0.001	0.476004		840.499	17.3774	2181.82	356766	7.19469	0.767191	6.71553	0.691286	10.2407	20.7203
B1728 M 35 1/1/2018 10:39:13 PM (Run: 1)			319.686	172.642	59.6382	0.540037	79.0538		0.127405	9.66915	4.09122	11.3578	3.18888	12.1505	0.0946214	4.31664	0.355265	10.5684	4.31664	0.244426	11.3578	-2.89854e-16		2423.81	220.855	3149.02	180.33	1454.47	93.921	582.811	24.0541		81.4923	59.9296	1459.79	26.3692	420.395	1286.48		1280.31	122.281	6985.87	483386	2.61317	8.34351	27.4082	4.50796	61.9494	82.2813
Jan 1st, 2018
Isotope ratio and date errors include systematic calibration errors of 0.31% (207Pb/206Pb) and 1.30% (206Pb/238U) (all 2-sigma).
Trace element concentrations were deleted from analyses known to have intersected inclusions of other minerals based on P and Ti.
Ablation used a laser spot size of 25 microns, and a laser firing repetition rate of 10 Hz.
Activity of TiO2 for Ti-in-Zircon temperature calculation is 0.8.
Dec 21st, 2017 Experiment 3
Isotope ratio and date errors include systematic calibration errors of 0.38% (207Pb/206Pb) and 1.35% (206Pb/238U) (all 2-sigma).
Trace element concentrations were deleted from analyses known to have intersected inclusions of other minerals based on P and Ti.
Ablation used a laser spot size of 25 microns, and a laser firing repetition rate of 10 Hz.
Activity of TiO2 for Ti-in-Zircon temperature calculation is 0.8.
CP1802 Granite, Little Codroy Pond ( 47.83277° N, 59.07770° W)
CP1802 S 41 8/22/2019 4:45:23 PM (Run: 1)			478.68	899.627	48.1533	1.87939	2524.99		0.0200494	2.83448	17.4023	3.21441	0.468407	4.21089	0.0591194	2.72014	0.619273	16.9149	2.72014	0.0574636	3.21441	2.04455e-16		401.233	11.2607	509.403	70.6697	390.088	13.639	370.268	9.78801		27.3133	5.08099	392.463	9.8676	361.631	5196.85		419.047	13.244	2442.99	492945	4.23424	0.115103	114.27	1.36643	23.4638	34.4448
CP1802 S 38 8/22/2019 4:32:37 PM (Run: 1)			337.392	521.344	31.9886	1.54522	262.498		0.0204083	2.50496	17.1521	4.492	0.476674	5.12445	0.0592978	2.46617	0.457026	16.864	2.46617	0.0583018	4.492	-4.85042e-16		408.343	10.1262	541.133	98.226	395.789	16.7963	371.353	8.89941		31.3749	6.17378	398.888	9.00601	364.371	4137.15		455.948	11.2052	1681.51	509135	2.01292		75.7965	0.680517	14.5914	21.2373
CP1802 S 42 8/22/2019 4:47:10 PM (Run: 1)			181.603	339.115	18.1681	1.86734	118.804		0.0194051	3.79901	18.2048	7.4927	0.453247	7.92255	0.0598437	2.57415	0.309919	16.7102	2.57415	0.0549307	7.4927	1.86172e-16		388.461	14.6168	409.389	167.607	379.55	25.0894	374.675	9.36977		8.47946	1.28454	383.007	9.6449	374.845	4932.38		278.898	13.0265	1183.34	497214	1.40875	0.0496613	45.0922	0.595426	12.1472	17.9009
CP1802 S 37 8/22/2019 4:30:49 PM (Run: 1)			457.606	771.126	45.539	1.68513	649.274		0.0211611	3.04779	17.4312	4.25913	0.474618	5.56606	0.0600025	3.58341	0.628443	16.666	3.58341	0.0573685	4.25913	-1.17145e-16		423.248	12.7656	505.732	93.6981	394.373	18.1904	375.641	13.0761		25.7233	4.74998	396.786	13.1901	363.134	4375.84		542.463	24.2937	2327.3	506920	3.02439	0.016396	86.0581	0.594433	10.9955	20.2871
CP1802 S 35 8/22/2019 4:27:14 PM (Run: 1)			318.765	293.621	26.1655	0.921121	186.214		0.0194163	4.72364	17.4144	4.5704	0.476557	5.47424	0.0601898	3.0131	0.531844	16.6141	3.0131	0.0574236	4.5704	-3.90338e-16		388.684	18.1846	507.838	100.51	395.708	17.9398	376.78	11.0274		25.8071	4.78338	398.845	11.1486	378.596	2260.28		326.357	10.1426	1155.86	515152	2.84682	1.69636	57.33	0.592398	5.28195	8.0593
CP1802 S 43 8/22/2019 4:48:57 PM (Run: 1)			460.715	518.041	40.6332	1.12443	430.926		0.0208602	3.11378	17.1831	3.73345	0.48771	5.05417	0.0607803	3.40676	0.656291	16.4527	3.40676	0.0581966	3.73345	1.4058e-16		417.291	12.8603	537.158	81.6949	403.349	16.8238	380.369	12.5834		29.1886	5.69719	405.891	12.6734	375.985	2769.95		276.334	14.37	1782.79	510784	4.2925		83.7509	0.254695	5.23142	10.7895
CP1802 S 46 8/22/2019 4:54:20 PM (Run: 1)			320.902	596.555	33.4777	1.859	279.634		0.0211988	3.6062	17.4851	3.47861	0.480059	4.69421	0.0608781	3.15196	0.650805	16.4263	3.15196	0.0571916	3.47861	0		423.996	15.1309	498.959	76.6153	398.113	15.4599	380.963	11.6599		23.6483	4.30782	401.216	11.7632	369.216	3989.61
CP1802 S 53 8/22/2019 5:14:16 PM (Run: 1)			266.818	401.749	25.5905	1.5057	415.977		0.0205151	4.69187	17.6851	4.38185	0.475246	4.80358	0.0609572	1.96819	0.377503	16.405	1.96819	0.0565447	4.38185	-2.07941e-16		410.459	19.064	473.855	96.926	394.806	15.7126	381.444	7.28976		19.502	3.38439	398.135	7.43119	377.773	3112.1		459.448	11.0128	1389.42	481872	1.84927	0.0837246	58.5333	0.727817	14.4248	22.4146
CP1802 S 48 8/22/2019 4:57:55 PM (Run: 1)			623.752	755.505	56.9071	1.21123	842.813		0.0212634	2.90693	16.8224	3.2949	0.504484	4.22065	0.0615509	2.63772	0.597519	16.2467	2.63772	0.0594445	3.2949	2.05233e-16		425.273	12.2332	583.417	71.5362	414.733	14.3704	385.051	9.85916		34.0008	7.15706	416.597	9.92348	378.242	2733.38		300.7	13.8796	1902.92	497044	4.63251	2.09484	98.6164	1.45419	13.6797	19.0239
CP1802 S 56 8/22/2019 5:19:40 PM (Run: 1)			193.283	221.432	17.9582	1.14564	131.669		0.0236703	5.02481	17.3478	6.0493	0.489304	6.51335	0.0615632	2.41446	0.351335	16.2435	2.41446	0.0576443	6.0493	-2.45786e-16		472.854	23.4842	516.245	132.843	404.436	21.7285	385.125	9.0264		25.3988	4.77473	408.219	9.22202	372.098	2746.97		421.709	8.81925	900.651	493026	0.957151		40.145	0.279758	4.7341	9.03914
CP1802 S 54 8/22/2019 5:16:04 PM (Run: 1)			210.645	241.972	19.1151	1.14872	737.497		0.021805	4.45114	17.9021	4.22279	0.474339	4.95057	0.0615874	2.58382	0.498108	16.2371	2.58382	0.0558593	4.22279	-1.64483e-16		435.989	19.1986	446.817	93.8456	394.181	16.1725	385.272	9.6631		13.7741	2.26029	397.676	9.80772	379.637	3086.6		304.376	12.1251	1009.87	503580	1.78876		46.2447	0.185817	5.75317	7.21308
CP1802 S 40 8/22/2019 4:36:12 PM (Run: 1)			392.176	681.208	39.6983	1.73699	149.983		0.020585	3.22081	18.334	3.94073	0.46344	4.56633	0.061624	2.30695	0.47615	16.2274	2.30695	0.0545435	3.94073	0		411.842	13.1304	393.561	88.3958	386.648	14.6831	385.494	8.63249		2.04962	0.2983	389.054	8.78488	380.243	4747.22		393.621	13.9682	2083.22	492540	3.28863	0.142812	98.8479	0.914764	15.861	28.7362
CP1802 S 47 8/22/2019 4:56:08 PM (Run: 1)			343.251	538.726	34.1976	1.56948	293.804		0.0215501	2.88745	17.1912	3.16602	0.494751	3.49067	0.0616867	1.47007	0.361606	16.2109	1.47007	0.0581692	3.16602	1.92384e-16		430.948	12.3117	536.114	69.2913	408.143	11.7316	385.875	5.50618		28.0237	5.45579	411.217	5.59864	376.366	3174.88		351.458	17.6199	1777.75	497893	3.31445	0.0152858	81.9352	0.406741	7.40013	15.2569
CP1802 S 55 8/22/2019 5:17:52 PM (Run: 1)			398.002	631.838	40.1811	1.58752	347.844		0.0221064	3.23775	18.3116	3.38456	0.466647	4.46502	0.0619747	2.91225	0.628815	16.1356	2.91225	0.0546101	3.38456	1.81607e-16		441.951	14.1539	396.288	75.8842	388.87	14.425	387.623	10.9559		2.18642	0.320689	391.369	11.1096	374.921	4665.64		301.911	14.9711	2008.6	480599	3.19259	0.178859	58.72	1.21055	18.8689	25.3172
CP1802 S 44 8/22/2019 4:50:45 PM (Run: 1)			481.232	1170.58	56.4663	2.43246	193.204		0.0210017	3.6159	16.7104	3.6507	0.512677	4.07376	0.062134	1.80775	0.402244	16.0942	1.80775	0.0598429	3.6507	-2.70794e-16		420.093	15.0333	597.925	79.0672	420.248	14.0192	388.591	6.81721		35.0101	7.53293	422.817	6.90741	374.694	8407.17		615.441	16.1701	3188.64	481808	4.42876	0.318745	154.91	3.05754	50.7061	67.4336
CP1802 M 1 8/19/2019 6:41:26 PM (Run: 1)			194.633	89.5106	14.8501	0.459894	163.352		0.0251101	8.82351	19.0275	13.7359	0.450919	14.2759	0.0622269	3.88928	0.267946	16.0702	3.88928	0.0525556	13.7359	-5.25946e-16		501.262	43.6849	309.662	312.725	377.923	45.0494	389.154	14.6875		-25.6704	-2.97187	374.146	15.2921	376.41	909.386		122.389	11.2583	380.106	397789	1.56569		20.0782	0.109812	1.11082	3.18891
CP1802 S 49 8/22/2019 4:59:43 PM (Run: 1)			280.748	575.978	30.912	2.05159	1433.69		0.0210722	4.73019	16.1569	4.46506	0.532481	5.78857	0.0623968	3.68385	0.622081	16.0265	3.68385	0.0618929	4.46506	0		421.489	19.7308	670.421	95.5463	433.455	20.4226	390.185	13.9475		41.8	9.98259	437.387	13.9836	381.773	3872.44
CP1802 S 50 8/22/2019 5:01:30 PM (Run: 1)			553.851	636.41	49.7955	1.14906	631.537		0.0204626	2.92333	17.3337	3.20097	0.496693	3.88547	0.0624421	2.20242	0.53116	16.0148	2.20242	0.0576911	3.20097	1.26653e-16		409.419	11.8483	518.036	70.272	409.461	13.0927	390.46	8.34433		24.6267	4.64043	411.542	8.43765	389.044	2892.46		248.301	15.8361	1977.72	494775	4.44152		98.056	0.278259	6.60306	12.3074
CP1802 S 39 8/22/2019 4:34:24 PM (Run: 1)			366.491	653.047	38.2406	1.78189	225.833		0.0207656	3.62038	17.4963	3.50237	0.4981	4.29327	0.0632066	2.48306	0.549642	15.8211	2.48306	0.0571548	3.50237	0		415.419	14.8862	497.516	77.1584	410.415	14.4942	395.097	9.51592		20.5861	3.73235	413.278	9.63026	391.976	5190.99		279.142	12.4345	2100.03	514327	2.3995	0.117123	85.7237	1.59178	28.4697	35.9971
CP1802 M 9 8/19/2019 6:57:03 PM (Run: 1)			253.817	185.535	21.4632	0.730982	1179.72		0.0242225	5.21073	17.103	5.57611	0.514439	6.28864	0.0638122	2.90757	0.448779	15.671	2.90757	0.0584694	5.57611	2.16898e-16		483.753	24.9078	547.384	121.804	421.429	21.6904	398.768	11.2431		27.1503	5.37733	418.271	11.4113	384.156	1713.38		150.552	8.96326	736.806	376146	2.95558	1.05768	51.5016	1.22672	11.3511	9.15053
CP1802 M 2 8/19/2019 6:43:23 PM (Run: 1)			189.208	149.936	16.3315	0.792442	37.2918		0.0235661	4.79249	17.2066	6.1624	0.518121	7.09136	0.0646584	3.50886	0.484793	15.4659	3.50886	0.0581172	6.1624	-1.62439e-16		470.796	22.3021	534.164	134.914	423.896	24.5745	403.894	13.7372		24.3876	4.71855	420.276	13.9345	390.087	1814.34		268.07	7.68141	629.048	393558	1.10952		35.4462	0.164996	3.98721	5.78419
CP1802 S 57 8/22/2019 5:21:28 PM (Run: 1)			3608.3	5636.95	445.634	1.56222	1677.94		0.0283237	2.26801	15.9744	2.25428	0.676379	2.7034	0.0783634	1.49217	0.476514	12.7611	1.49217	0.0626002	2.25428	-1.25657e-16		564.526	12.6264	694.704	48.0457	524.583	11.0753	486.347	6.99013		29.9923	7.28898	505.23	7.07968	434.123	4261.08		496.51	11.3708	3396.99	473144	39.0532		195.281	0.408403	11.5201	35.7818
DISCORDANT ANALYSES
CP1802 S 51 8/22/2019 5:10:41 PM (Run: 1)			136.382	117.848	11.9692	0.864096	127.47		0.023588	6.79752	15.6484	7.98361	0.551804	8.45454	0.062626	2.78228	0.316126	15.9678	2.78228	0.0639042	7.98361	0		471.228	31.6613	738.486	168.945	446.178	30.5259	391.576	10.5704		46.9759	12.2378	451.064	10.7958	384.933	2064.09		238.707	7.25889	577.534	497714	1.00053	0.121156	25.4515	0.355112	4.47637	5.70025
CP1802 M 8 8/19/2019 6:55:06 PM (Run: 1)			105.461	77.7009	8.88937	0.736775	21.5874		0.0262345	19.677	15.5384	9.99221	0.548816	14.5981	0.0618487	10.6424	0.727428	16.1685	10.6424	0.0643568	9.99221	2.63747e-16		523.419	101.671	753.409	210.938	444.221	52.5235	386.859	39.9601		48.6522	12.9129	440.346	39.8416	364.706	1745.22		274.5	7.72891	441.745	417076	1.02145		22.94	0.279572	3.47779	4.37429
CP1802 M 6 8/19/2019 6:51:12 PM (Run: 1)			112.089	70.7337	9.51781	0.631052	86.9097		0.029279	8.78198	14.1859	6.26073	0.6111	7.36511	0.0628738	3.87919	0.517997	15.9049	3.87919	0.0704923	6.26073	2.88788e-16		583.293	50.4926	942.748	128.266	484.254	28.3661	393.079	14.7927		58.305	18.8279	480.607	14.707	368.169	1062.56		324.876	13.5463	334.397	376832	1.33572	4.45787	30.1246	0.880262	6.71593	2.45735
CP1802 S 52 8/22/2019 5:12:29 PM (Run: 1)			221.776	313.166	32.2851	1.41209	64.8266		0.0441044	37.9026	11.1476	23.6006	0.936331	27.5423	0.0757023	14.1983	0.514729	13.2096	14.1983	0.0897055	23.6006	-1.71289e-16		872.346	323.608	1419.28	451.108	670.96	135.232	470.419	64.4126		66.8551	29.8886	678.208	62.8163	370.968	1170.54		493.817	11.9021	1270.04	471860	2.01791	0.692134	60.4624	0.582336	9.26286	14.8801
CP1802 S 36 8/22/2019 4:29:02 PM (Run: 1)			350.749	342.846	34.5603	0.977467	3128.47		0.0286333	4.81548	11.2601	11.6445	0.786972	12.0528	0.064269	3.11077	0.249925	15.5596	3.11077	0.0888089	11.6445	0		570.609	27.0933	1400.03	223.167	589.453	53.8965	401.535	12.1098		71.3195	31.88	595.571	12.602	376.898	1783.93		323.42	9.70634	1015.02	489433	1.57229	1.82864	45.0058	1.63619	12.9204	15.2564
CP1802 M 3 8/19/2019 6:45:20 PM (Run: 1)			1076.49	851.268	87.6001	0.790778	221.774		0.0317592	6.51387	8.77297	7.66627	0.790332	10.8559	0.0502869	7.6863	0.705044	19.8859	7.6863	0.113986	7.66627	0		631.938	40.5268	1863.92	138.393	591.36	48.66	316.283	23.7237		83.0313	46.516	596.918	21.8592	275.521	1730.84		234.178	31.7444	1900.23	393390	9.95452	17.4529	206.18	24.7675	161.404	101.861
CP1802 M 7 8/19/2019 6:53:09 PM (Run: 1)			713.377	269.432	79.4461	0.377684	2412.44		0.0756358	5.22308	6.6239	3.76613	1.49587	4.46031	0.0718631	2.3897	0.512458	13.9154	2.3897	0.150968	3.76613	1.97584e-16		1473.71	74.2338	2356.92	64.326	928.706	27.1436	447.37	10.3283		81.0188	51.8286	934.047	9.50269	386.531	617.006		43.606	3.48387	740.881	390495	4.49518	0.759373	27.3158	0.308365	2.52709	2.59171
CP1802 S 59 8/22/2019 5:25:03 PM (Run: 1)			533.691	992.298	82.9543	1.85931	129.307		0.0370282	3.11564	5.54337	3.05297	1.81714	3.63625	0.0730569	1.97526	0.500868	13.688	1.97526	0.180396	3.05297	1.47884e-16		734.895	22.4854	2656.52	50.6142	1051.65	23.8157	454.546	8.66925		82.8894	56.778	1059.53	7.89123	351.88	3760.7		496.66	15.2242	2189.02	477634	3.98142	6.80448	134.074	6.46481	54.7632	44.0365
CP1802 S 45 8/22/2019 4:52:33 PM (Run: 1)			665.238	805.907	90.6916	1.21146	104.552		0.0456805	7.72123	4.97771	4.775	1.8628	5.38877	0.0672505	2.49763	0.44078	14.8698	2.49763	0.200895	4.775	0		902.834	68.1759	2833.48	77.8817	1067.98	35.6037	419.569	10.1455		85.1924	60.7138	1075.4	9.50038	315.211	3339.09		778.138	20.8496	2107.17	460243	5.37963	23.7006	179.91	20.8547	151.275	100.131
Aug 19th, 2019 Experiment 1
Isotope ratio and apparent age errors include systematic calibration errors of 0.70% (207Pb/206Pb) and 0.85% (206Pb/238U) (all 2-sigma).
Trace element concentrations were deleted from analyses known to have intersected inclusions of other minerals based on P and Ti.
Ablation used a laser spot size of 25 microns, and a laser firing repetition rate of 10 Hz.
Activity of TiO2 for Ti-in-Zircon temperature calculation is 0.8.
Aug 22nd, 2019 Experiment 1
Isotope ratio and apparent age errors include systematic calibration errors of 0.70% (207Pb/206Pb) and 0.85% (206Pb/238U) (all 2-sigma).
Trace element concentrations were deleted from analyses known to have intersected inclusions of other minerals based on P and Ti.
Ablation used a laser spot size of 25 microns, and a laser firing repetition rate of 10 Hz.
Activity of TiO2 for Ti-in-Zircon temperature calculation is 0.8.
NOTES:
z number (in bold, eg. z1) refers to the zircon fraction analyzed by CA-ID-TIMS for a given crystal of a given sample.
For notes on metamorphic zircon domains: m = metamorphic; dp = dark, planar CL texture; bfir = bright, fir tree zonation CL texture; c = metamorphic core; wg = whole metamorphic grain
[truncated: 42 more columns]

## Sheet: Info
This Supplemental Material accompanies Hodgin, E.B., Macdonald, F.A., Karabinos, P., Crowley, J.L., and Reusch, D.N., 2022, A reevaluation of the tectonic history
of the Dashwoods terrane using in situ and isotope-dilution U-Pb geochronology, western Newfoundland, in Kuiper, Y.D., Murphy, J.B., Nance, R.D., Strachan, R.A.,
and Thompson, M.D., eds., New Developments in the Appalachian-Caledonian-Variscan Orogen: Geological Society of America Special Paper 554, p. 1–22, https://doi.org/10.1130/2021.2554(10).
