# Supplementary material
Source: publisher figshare collection journal article supplement (https://gsapubs.figshare.com/articles/dataset/_/18730850)
Supplement: Supplementary file 4 [file 1]

**Table S2. CA-ID-TIMS U-Th-Pb isotopic data**

|        |          | Compositional Parameters |                     |                    |                 |                 |                   | Radiogenic Isotope Ratios |                   |                   |                   |           |                   |                   | Isotopic Ages     |                   |                   |                   |                   |                  |       |
|--------|----------|--------------------------|---------------------|--------------------|-----------------|-----------------|-------------------|---------------------------|-------------------|-------------------|-------------------|-----------|-------------------|-------------------|-------------------|-------------------|-------------------|-------------------|-------------------|------------------|-------|
|        |          | Th                       | <sup>206</sup> Pb*  | mol %              | Pb*             | Pb <sub>c</sub> | <sup>206</sup> Pb | <sup>208</sup> Pb         | <sup>207</sup> Pb | <sup>207</sup> Pb | <sup>206</sup> Pb | corr.     | <sup>207</sup> Pb | <sup>207</sup> Pb | <sup>206</sup> Pb | ±                 | <sup>207</sup> Pb | <sup>207</sup> Pb | <sup>206</sup> Pb | ±                |       |
| sample | LA-ICPMS | U                        | 10 <sup>-13</sup> m | <sup>206</sup> Pb* | Pb <sub>c</sub> | (pg)            | <sup>204</sup> Pb | <sup>206</sup> Pb         | <sup>206</sup> Pb | % err             | <sup>235</sup> U  | % err     | <sup>238</sup> U  | % err             | coef.             | <sup>206</sup> Pb | ±                 | <sup>235</sup> U  | ±                 | <sup>238</sup> U | ±     |
| (a)    | spot #   | (b)                      | (c)                 | (c)                | (c)             | (c)             | (d)               | (e)                       | (e)               | (f)               | (e)               | (f)       | (e)               | (f)               |                   | (g)               | (f)               | (g)               | (f)               | (g)              | (f)   |
| B1559  |          |                          |                     |                    |                 |                 |                   |                           |                   |                   |                   |           |                   |                   |                   |                   |                   |                   |                   |                  |       |
| z1b    | S33      | 0.893                    | 0.0083              | 56.99%             | 0               | 0.52            | 42                | 0.278                     | 0.062311          | ####              | 0.82190           | 162.91484 | 0.095666          | 2.028             | 0.116             | 684.78            | 3473              | 609.11            | 746.25            | 588.96           | 11.41 |
| z2     | S21      | 0.419                    | 0.8270              | 99.77%             | 128             | 0.16            | 7867              | 0.132                     | 0.056121          | 0.187             | 0.56519           | 0.22009   | 0.073042          | 0.081             | 0.560             | 457.14            | 4.15              | 454.90            | 0.81              | 454.46           | 0.36  |
| z3     | S20      | 0.429                    | 1.1997              | 99.80%             | 150             | 0.20            | 9142              | 0.134                     | 0.05643           | 0.089             | 0.58156           | 0.14887   | 0.074741          | 0.071             | 0.914             | 469.44            | 1.96              | 465.46            | 0.56              | 464.66           | 0.32  |
| z5a    | S25      | 0.365                    | 0.8045              | 99.58%             | 69              | 0.28            | 4300              | 0.115                     | 0.05648           | 0.170             | 0.57732           | 0.23825   | 0.074136          | 0.122             | 0.735             | 471.24            | 3.76              | 462.74            | 0.89              | 461.03           | 0.54  |
| z5b    | S25      | 0.392                    | 0.6826              | 99.63%             | 80              | 0.21            | 4935              | 0.123                     | 0.05629           | 0.126             | 0.57391           | 0.18099   | 0.073942          | 0.072             | 0.849             | 463.92            | 2.79              | 460.54            | 0.67              | 459.86           | 0.32  |
| z6     | S30      | 0.288                    | 0.1685              | 98.58%             | 20              | 0.20            | 1273              | 0.090                     | 0.05639           | 0.512             | 0.57795           | 0.57991   | 0.074338          | 0.153             | 0.552             | 467.65            | 11.33             | 463.15            | 2.16              | 462.24           | 0.68  |
| B1725  |          |                          |                     |                    |                 |                 |                   |                           |                   |                   |                   |           |                   |                   |                   |                   |                   |                   |                   |                  |       |
| z1a    | S191     | 1.027                    | 0.1399              | 97.57%             | 14              | 0.29            | 741               | 0.322                     | 0.05579           | 0.848             | 0.54548           | 0.89707   | 0.070916          | 0.166             | 0.377             | 443.91            | 18.86             | 442.03            | 3.21              | 441.67           | 0.71  |
| z1b    | S191     | 0.888                    | 0.0725              | 84.78%             | 2               | 1.08            | 118               | 0.279                     | 0.05638           | 2.322             | 0.55256           | 2.46767   | 0.071078          | 0.329             | 0.496             | 467.45            | 51.42             | 446.67            | 8.92              | 442.65           | 1.41  |
| z2     | M162     | 0.875                    | 0.6735              | 99.47%             | 62              | 0.30            | 3420              | 0.275                     | 0.05580           | 0.147             | 0.54549           | 0.19871   | 0.070906          | 0.073             | 0.796             | 444.27            | 3.28              | 442.04            | 0.71              | 441.61           | 0.31  |
| B1721A |          |                          |                     |                    |                 |                 |                   |                           |                   |                   |                   |           |                   |                   |                   |                   |                   |                   |                   |                  |       |
| z2     | L121     | 0.703                    | 0.0639              | 78.98%             | 1               | 1.42            | 85                | 0.220                     | 0.05724           | 3.978             | 0.58610           | 4.13452   | 0.074260          | 0.365             | 0.466             | 500.85            | 87.58             | 468.37            | 15.51             | 461.77           | 1.63  |
| z3     | L116     | 0.849                    | 1.3545              | 99.81%             | 177             | 0.21            | 9703              | 0.266                     | 0.05592           | 0.085             | 0.55419           | 0.14587   | 0.071877          | 0.070             | 0.923             | 449.20            | 1.90              | 447.74            | 0.53              | 447.45           | 0.30  |
| z4     | L117     | 0.348                    | 2.2264              | 99.47%             | 54              | 0.98            | 3410              | 0.109                     | 0.05607           | 0.112             | 0.56789           | 0.16854   | 0.073452          | 0.075             | 0.851             | 455.26            | 2.48              | 456.65            | 0.62              | 456.92           | 0.33  |
| z5     | M105     | 0.399                    | 0.8503              | 99.79%             | 138             | 0.15            | 8525              | 0.125                     | 0.05581           | 0.094             | 0.55178           | 0.15641   | 0.071707          | 0.072             | 0.930             | 444.76            | 2.08              | 446.16            | 0.56              | 446.43           | 0.31  |
| NLJP02 |          |                          |                     |                    |                 |                 |                   |                           |                   |                   |                   |           |                   |                   |                   |                   |                   |                   |                   |                  |       |
| z1a    | S250     | 0.280                    | 1.338               | 0.994              | 49.48           | 0.64            | 3100              | 0.088                     | 0.05644           | 0.106             | 0.58193           | 0.16485   | 0.074775          | 0.072             | 0.890             | 469.87            | 2.35              | 465.70            | 0.62              | 464.86           | 0.32  |
| z1b    | S250     | 0.262                    | 0.560               | 0.986              | 19.14           | 0.69            | 1215              | 0.082                     | 0.05651           | 0.214             | 0.58536           | 0.26675   | 0.075122          | 0.089             | 0.701             | 472.61            | 4.74              | 467.90            | 1.00              | 466.94           | 0.40  |
| z1c    | S250     | 0.235                    | 0.090               | 0.962              | 7.12            | 0.29            | 472               | 0.074                     | 0.05561           | 1.035             | 0.57622           | 1.12163   | 0.075150          | 0.203             | 0.500             | 436.86            | 23.04             | 462.03            | 4.16              | 467.11           | 0.91  |
| z1d    | S250     | 0.243                    | 0.198               | 0.980              | 13.49           | 0.34            | 874               | 0.076                     | 0.05584           | 0.414             | 0.57849           | 0.46795   | 0.075137          | 0.111             | 0.574             | 445.99            | 9.20              | 463.49            | 1.74              | 467.03           | 0.50  |
| z2a    | S261     | 0.179                    | 0.583               | 0.981              | 13.92           | 0.96            | 907               | 0.056                     | 0.05626           | 0.271             | 0.57596           | 0.32210   | 0.074254          | 0.086             | 0.683             | 462.50            | 6.01              | 461.86            | 1.20              | 461.73           | 0.38  |
| z2b    | S261     | 0.19                     | 0.134               | 0.985              | 18.51           | 0.17            | 1222              | 0.060                     | 0.05640           | 0.466             | 0.57710           | 0.52759   | 0.074206          | 0.133             | 0.564             | 468.3             | 10.3              | 462.6             | 1.96              | 461.45           | 0.59  |
| z2c    | S261     | 0.124                    | 0.078               | 0.960              | 6.47            | 0.27            | 445               | 0.039                     | 0.05516           | 1.346             | 0.56327           | 1.57822   | 0.074064          | 0.665             | 0.534             | 418.6             | 30.1              | 453.65            | 5.77              | 460.59           | 2.96  |

(a) z1, z2 etc. are labels for single zircon grains or fragments annealed and chemically abraded after Mattinson (2005).

(b) Model Th/U ratio iteratively calculated from the radiogenic <sup>208</sup>Pb/<sup>206</sup>Pb ratio and <sup>206</sup>Pb/<sup>238</sup>U age.

(c) Pb\* and Pb<sub>c</sub> represent radiogenic and common Pb, respectively; mol % <sup>206</sup>Pb\* with respect to radiogenic, blank and initial common Pb.

(d) Measured ratio corrected for spike and fractionation only. Fractionation estimated at 0.18 +/- 0.03 ‰/a.m.u. for Daly analyses, based on analysis of NBS-981 and NBS-982.

(e) Corrected for fractionation, spike, and common Pb; up to 1 pg of common Pb was assumed to be procedural blank: <sup>206</sup>Pb/<sup>204</sup>Pb = 18.042 ± 0.61%; <sup>207</sup>Pb/<sup>204</sup>Pb = 15.537 ± 0.52%; <sup>208</sup>Pb/<sup>204</sup>Pb = 37.686 ± 0.63% (all uncertainties 1-sigma).

Excess over blank was assigned to initial common Pb, using the Stacey and Kramers (1975) two-stage Pb isotope evolution model at the nominal sample age.

(f) Errors are 2-sigma, propagated using the algorithms of Schmitz and Schoene (2007).

(g) Calculations are based on the decay constants of Jaffey et al. (1971) and Hiess et al. (2012). <sup>206</sup>Pb/<sup>238</sup>U and <sup>207</sup>Pb/<sup>206</sup>Pb ages corrected for initial disequilibrium in <sup>230</sup>Th/<sup>238</sup>U using Th/U [magma] = 3.
